# Supplementary material for: Pangenome analysis of nine Soybean Cyst Nematode genomes reveal hidden variation contributing to diversity and adaptation
Source: Research Square preprint supplement (doi:10.21203/rs.3.rs-7716171/v1), 2025-10-16
Supplement: Supplementary file 1 [file 6fe786525d4f352a88e53d7f.xlsx]

## Sheet: S0
Table S0: Description of SCN Inbred Populations used for Sequencing							1	2	3	4	5	6	7
SCN Population	Soybean Host	Description	Date	HG type1	Race1	Pickett	Peking (PI 548402)	PI 88788	PI 90763	PI 437654	PI 209332	PI 89772	Cloud (PI 548316)
PA3	Williams 82	PA3, inbred population developed by Prakash Arelli from a field population collected from Ames Plantation near Grand junction in Tennessee by Lawrence Young in 1987 (Colgrove and Niblack, 2008), maintained by mass selection on the susceptible soybean cv. Williams 82.	2019-02-08	7	3	3	2	3	1	0	6	0	12
TN7	PI 88788	TN7, inbred population developed by Terry Niblack from TN1 (gene pool isolated originally prepared by Victor Dropkin maintained on ‘Essex’ soybean) in 1996 by single cyst descent on PI 88788 (Colgrove and Niblack, 2008), maintained by mass selection on resistant PI 88788.	2017-10-30	2.5.7	1	5	1	95	0	0	75	0	70
			2018-10-03	2.5.7	1	4	2	106	0	0	116	0	84
MM26	Williams 82/Lee 74	MM26, SCN inbred population developed by Melissa Mitchum from an HG type 1.2.5.7, ‘race 2’ field population isolated from Missouri, USA, in 2016) (Meinhardt et al., 2021), maintained by mass selection on the susceptible soybean cv. Williams 82.	2019-03-13	1.2.5.7	2	43	14	35	0	0	39	1	51
TN22	PI 88788	TN22, inbred population developed by Terry Niblack from TN2 (isolate from a potato field inbred by mass selection on ‘Tiny Tim’ tomato) in 1999 by mass selection on PI 88788 (Colgrove and Niblack, 2008), maintained by mass selection on resistant PI 88788.	2017-10-09	1.2.5.7	2	82	24	117	0	0	87	1	109
			2018-09-17	1.2.5.7	2	72	27	113	1	0	114	0	101
TN8	PI 90763	TN8, inbred population developed by Terry Niblack from TN1 in 1996 by single cyst descent on PI 90763 (Colgrove and Niblack, 2008), maintained by mass selection on resistant PI 90763.	2017-11-02	1.2.3.6.7	4	109	75	22	75	0	8	96	39
			2018-10-04	1.2.3.5.6.7	4	79	77	10	75	0	11	67	39
OP50	Macon	OP50, inbred population developed by Charlie Opperman from a North Carolina field population (Dong and Opperman, 1997) by mass selection on PI 90763, then maintained by mass selection on susceptible soybean cv. Macon.	2017-11-06	1.2.3.5.6.7	4	118	109	42	88	0	49	89	44
			2018-09-10	1.2.3.5.6.7	4	73	63	29	38	0	30	46	33
TN20	PI 437654	TN20, developed by Terry Niblack in 1999 by single-cyst descent from LY1, a synthetic isolate, selected for reproduction on PI 437654 by Laurence Young in 1998 (Colgrove and Niblack, 2008), maintained by mass selection on resistant PI 437654.	2017-10-30	1.2.3.4.5.6.7	4	128	65	51	83	98	92	85	97
			2018-10-02	1.2.3.4.5.6.7	4	82	52	55	62	94	87	47	62
1HG type and race determined at the time of collection of eggs for this sequencing project.

## Sheet: S1
Table S1: Accession list of outgroup species
Species	Accession	Bioproject	GenBank	Link
H. glycines	TN10	PRJNA603076	-	https://www.ncbi.nlm.nih.gov/bioproject/?term=PRJNA603076
H. glycines	X12	PRJNA535374	GCA_015680885.1	https://www.ncbi.nlm.nih.gov/bioproject/?term=PRJNA535374
G. pallida	D383	PRJNA764088	GCA_020449905.1	https://www.ncbi.nlm.nih.gov/bioproject/?term=PRJNA764088
G. rostochiensis	L22	PRJNA695196	GCA_018350325.1	https://www.ncbi.nlm.nih.gov/bioproject/?term=PRJNA695196
C. elegans	Bristol N2	PRJNA13758	GCA_000002985.3	https://www.ncbi.nlm.nih.gov/bioproject/?term=PRJNA13758
H. glycines	TN7	PRJNA508846	GCA_046862275.1	https://www.ncbi.nlm.nih.gov/bioproject/508846
H. glycines	TN8	PRJNA508847	GCA_046862775.1	https://www.ncbi.nlm.nih.gov/bioproject/508847
H. glycines	TN20	PRJNA508848	GCA_046862005.1	https://www.ncbi.nlm.nih.gov/bioproject/508848
H. glycines	TN22	PRJNA508849	GCA_046862185.1	https://www.ncbi.nlm.nih.gov/bioproject/508849
H. glycines	MM26	PRJNA852516	GCA_040805935.1	https://www.ncbi.nlm.nih.gov/bioproject/852516
H. glycines	OP50	PRJNA508850	GCA_049307805.1	https://www.ncbi.nlm.nih.gov/bioproject/508850
H. glycines	PA3	PRJNA852521	GCA_040805705.1	https://www.ncbi.nlm.nih.gov/bioproject/852521

## Sheet: S2
Table S2: Genome sequencing statistics of nine SCN accessions
	Sequencing Depth = Total Bases Sequenced/Genome Size (120 Mb)
Assembly	ONT	ONT Ultralong	PacBio Hifi	Pacbio CLR	Illumina HiC	Illumina Chicago
TN7	47x	-	-	-	88x	87x
TN8	68x	-	-	-	79x	74x
TN20	30x	-	-	-	77x	65x
TN22	74x	-	-	-	73x	65x
OP50	44x	-	-	-	75x	84x
MM26	-	9x	89x	-	80x	67x
PA3	-	-	88x	69x	72x	58x

## Sheet: S3
Table S3: Gene annotation statistics of nine SCN accessions
Assembly	Avg_CDS_Length	Avg_Num_Introns	Avg_Seq_Length	% Protein Annotation	BUSCO (-protein)	BUSCO (-genome)
TN7	1339.55	0.512547	3653.76	0.7062	0.941	0.928
TN8	1381.4	0.502608	3711.96	0.7115	0.958	0.93
TN20	1302.63	0.418387	3277.93	0.6907	0.963	0.931
TN22	1373.52	0.511204	3824.38	0.7066	0.938	0.919
OP50	1420.18	0.448852	3806.31	0.7305	0.96	0.936
MM26	1221.75	0.701107	3189.72	0.67	0.953	0.933
PA3	1241.59	0.503233	3217.24	0.6726	0.945	0.928
TN10	1264.38	0.748516	3160.21	0.6607	0.955	0.926
X12	1247.45	0.585319	3146.69	0.6707	0.879	0.854

## Sheet: S4
Table S4: Ortholog gene counts within the SCN pangenome
Orthogroup	MM26	OP50	PA3	TN10	TN20	TN22	TN7	TN8	X12	Total
OG0000000	27	9	20	33	33	26	18	13	28	207
OG0000001	42	15	18	19	10	21	7	11	17	160
OG0000002	16	27	14	1	25	23	17	12	21	156
OG0000003	37	20	11	8	16	5	8	25	20	150
OG0000004	24	7	15	17	23	10	14	21	16	147
OG0000005	20	8	17	7	18	12	6	8	11	107
OG0000006	17	10	11	1	13	13	6	10	15	96
OG0000007	19	2	17	8	3	8	10	9	18	94
OG0000008	9	16	11	10	7	9	6	11	14	93
OG0000009	12	4	15	12	16	9	5	9	11	93
OG0000010	7	2	12	11	14	15	9	6	16	92
OG0000011	27	5	18	4	9	3	4	2	19	91
OG0000012	13	5	10	28	14	10	4	2	4	90
OG0000013	16	0	12	15	16	10	11	2	7	89
OG0000014	19	7	8	18	6	3	6	5	15	87
OG0000015	18	9	14	5	8	14	1	8	7	84
OG0000016	7	4	10	12	10	10	11	14	5	83
OG0000017	28	0	0	0	0	43	0	0	5	76
OG0000018	12	13	10	4	7	12	1	2	14	75
OG0000019	10	7	8	12	13	4	10	8	3	75
OG0000020	16	3	11	3	20	1	6	4	10	74
OG0000021	22	1	10	3	4	4	9	1	19	73
OG0000022	15	12	12	1	4	8	4	8	7	71
OG0000023	13	3	9	5	6	8	8	3	16	71
OG0000024	9	1	3	8	12	16	0	12	9	70
OG0000025	7	6	7	12	4	7	6	8	12	69
OG0000026	6	23	4	15	8	4	5	2	2	69
OG0000027	13	4	5	6	10	5	10	4	10	67
OG0000028	3	0	1	0	0	0	0	40	22	66
OG0000029	16	3	4	14	5	9	8	1	4	64
OG0000030	6	3	0	10	22	12	4	2	5	64
OG0000031	9	2	4	17	7	8	6	4	6	63
OG0000032	11	1	4	8	13	11	4	6	5	63
OG0000033	9	20	10	5	10	3	2	1	2	62
OG0000034	2	10	7	9	5	6	12	4	7	62
OG0000035	8	2	8	11	10	5	7	4	7	62
OG0000036	13	4	10	9	5	7	3	4	6	61
OG0000037	29	2	1	3	5	1	9	8	1	59
OG0000038	8	5	5	9	2	7	8	8	6	58
OG0000039	10	3	11	2	15	7	6	3	1	58
OG0000040	7	3	9	4	12	6	6	4	7	58
OG0000041	8	6	7	3	6	5	6	7	9	57
OG0000042	11	5	5	5	6	4	4	4	12	56
OG0000043	7	6	6	2	7	6	7	4	11	56
OG0000044	2	11	8	5	6	7	6	3	8	56
OG0000045	5	12	3	2	1	5	3	3	21	55
OG0000046	5	10	6	2	6	3	8	7	8	55
OG0000047	8	7	8	8	7	5	3	8	1	55
OG0000048	8	3	9	6	3	8	6	6	5	54
OG0000049	6	7	6	6	6	6	6	6	5	54
OG0000050	7	5	5	4	3	8	6	8	8	54
OG0000051	6	3	5	8	10	10	3	3	6	54
OG0000052	6	4	7	2	4	5	9	6	11	54
OG0000053	9	4	7	1	6	2	6	8	10	53
OG0000054	37	5	0	1	3	0	6	0	1	53
OG0000055	14	4	7	4	9	5	5	1	4	53
OG0000056	8	8	4	7	8	8	4	5	1	53
OG0000057	14	10	3	1	3	4	8	2	8	53
OG0000058	8	0	5	9	6	7	5	7	6	53
OG0000059	7	6	8	11	9	4	3	2	3	53
OG0000060	35	1	5	0	1	3	3	2	2	52
OG0000061	18	3	9	2	5	2	2	3	8	52
OG0000062	7	5	6	5	6	5	3	9	6	52
OG0000063	10	5	9	3	8	6	6	4	1	52
OG0000064	6	7	4	7	7	9	8	2	2	52
OG0000065	7	8	6	5	4	6	6	6	4	52
OG0000066	5	0	0	44	1	0	0	0	2	52
OG0000067	10	3	2	2	8	3	8	3	12	51
OG0000068	11	2	6	6	10	1	10	4	1	51
OG0000069	9	2	7	3	4	7	7	6	6	51
OG0000070	4	5	10	1	3	9	5	9	5	51
OG0000071	2	3	1	0	1	36	1	3	4	51
OG0000072	25	3	7	1	3	6	0	4	1	50
OG0000073	9	0	6	17	1	2	8	2	5	50
OG0000074	7	3	7	1	6	5	8	7	6	50
OG0000075	5	6	11	5	8	6	3	4	2	50
OG0000076	8	2	8	3	6	8	7	4	4	50
OG0000077	9	5	7	3	2	6	6	2	9	49
OG0000078	14	2	5	4	1	5	2	9	7	49
OG0000079	6	1	3	1	8	9	8	7	6	49
OG0000080	17	5	5	1	3	1	0	5	12	49
OG0000081	6	4	2	4	13	8	4	1	7	49
OG0000082	7	7	6	1	4	8	7	4	5	49
OG0000083	13	2	7	4	2	1	4	3	13	49
OG0000084	8	2	5	0	4	12	5	8	5	49
OG0000085	10	4	9	5	6	7	1	2	5	49
OG0000086	6	6	3	5	6	7	7	6	3	49
OG0000087	11	4	5	0	4	4	4	7	9	48
OG0000088	16	3	4	1	4	1	4	4	11	48
OG0000089	9	4	2	3	7	5	8	7	3	48
OG0000090	6	5	6	2	9	5	3	6	6	48
OG0000091	13	3	5	1	5	0	6	2	13	48
OG0000092	6	4	6	4	6	5	5	6	6	48
OG0000093	8	0	0	0	4	3	27	1	5	48
OG0000094	7	4	5	10	6	5	2	6	3	48
OG0000095	22	1	0	3	0	0	1	1	19	47
OG0000096	8	0	0	3	9	8	16	2	1	47
OG0000097	10	5	4	7	5	5	4	3	4	47
OG0000098	6	7	3	5	9	5	4	5	3	47
OG0000099	10	4	5	4	4	4	3	5	7	46
OG0000100	16	4	6	1	4	3	1	4	7	46
OG0000101	10	3	5	2	7	8	4	0	7	46
OG0000102	9	4	2	0	7	8	5	5	6	46
OG0000103	7	6	7	4	7	3	5	2	5	46
OG0000104	7	1	6	8	3	5	3	6	7	46
OG0000105	5	3	7	8	4	6	3	4	6	46
OG0000106	7	4	5	3	3	6	7	6	5	46
OG0000107	11	3	4	6	2	4	6	7	2	45
OG0000108	15	1	4	4	9	3	3	2	4	45
OG0000109	5	1	7	8	8	4	4	4	4	45
OG0000110	10	1	5	4	4	7	5	3	6	45
OG0000111	4	4	7	5	7	6	3	5	4	45
OG0000112	8	2	4	3	3	7	3	4	11	45
OG0000113	11	2	2	3	6	4	3	4	9	44
OG0000114	7	7	6	4	1	3	5	5	6	44
OG0000115	6	4	5	6	4	7	5	5	2	44
OG0000116	0	0	0	0	43	0	0	0	1	44
OG0000117	4	7	4	4	6	4	6	3	5	43
OG0000118	4	3	9	1	5	7	4	6	4	43
OG0000119	3	4	5	4	5	4	5	5	8	43
OG0000120	5	5	6	3	5	6	5	6	2	43
OG0000121	7	5	3	9	3	1	4	5	6	43
OG0000122	6	3	5	1	7	4	6	4	6	42
OG0000123	7	4	0	0	7	7	3	11	3	42
OG0000124	7	10	2	2	3	6	3	4	5	42
OG0000125	6	5	6	7	6	4	3	2	3	42
OG0000126	8	4	5	0	8	2	4	5	6	42
OG0000127	13	0	7	2	0	3	2	15	0	42
OG0000128	3	9	6	0	5	8	4	4	3	42
OG0000129	5	3	7	5	6	6	4	3	3	42
OG0000130	4	6	5	5	7	4	3	5	3	42
OG0000131	4	2	4	7	5	5	5	6	4	42
OG0000132	7	3	3	4	4	4	6	5	6	42
OG0000133	9	6	9	4	5	1	2	5	0	41
OG0000134	8	3	2	4	9	4	3	6	2	41
OG0000135	3	9	7	3	1	2	2	4	10	41
OG0000136	4	4	2	6	8	7	4	5	1	41
OG0000137	7	7	8	4	4	3	5	1	2	41
OG0000138	4	7	7	9	3	2	2	3	4	41
OG0000139	7	2	6	4	4	2	4	3	9	41
OG0000140	4	5	6	0	5	5	9	3	3	40
OG0000141	3	6	6	4	4	2	4	6	5	40
OG0000142	9	3	4	6	4	4	4	5	1	40
OG0000143	7	3	4	7	3	8	2	1	5	40
OG0000144	5	4	6	4	7	3	8	0	3	40
OG0000145	4	4	3	8	5	3	5	4	4	40
OG0000146	9	4	3	4	6	6	3	1	4	40
OG0000147	3	3	4	1	8	7	2	3	9	40
OG0000148	6	4	3	3	4	5	4	4	7	40
OG0000149	6	2	5	5	7	5	4	2	4	40
OG0000150	3	3	6	6	5	1	4	5	7	40
OG0000151	5	1	7	7	5	2	6	3	4	40
OG0000152	7	3	6	4	2	5	5	5	3	40
OG0000153	6	4	4	5	4	5	4	4	4	40
OG0000154	6	4	2	10	3	3	3	6	3	40
OG0000155	3	2	5	6	8	6	3	3	4	40
OG0000156	9	4	11	1	6	1	2	1	5	40
OG0000157	6	3	5	3	2	5	4	3	8	39
OG0000158	9	3	4	4	2	5	4	4	4	39
OG0000159	6	2	4	2	2	7	3	6	7	39
OG0000160	4	6	4	2	4	4	4	4	7	39
OG0000161	6	3	7	4	6	4	5	3	1	39
OG0000162	7	3	4	7	5	2	5	2	4	39
OG0000163	6	3	6	4	6	1	4	4	5	39
OG0000164	7	4	7	3	3	4	4	3	4	39
OG0000165	4	3	4	5	7	6	3	3	4	39
OG0000166	4	3	6	3	3	3	5	3	9	39
OG0000167	5	6	5	1	4	5	5	4	4	39
OG0000168	10	3	3	2	4	4	6	4	2	38
OG0000169	6	2	2	4	7	5	3	4	5	38
OG0000170	3	10	4	4	2	8	1	5	1	38
OG0000171	2	0	4	2	2	1	14	8	5	38
OG0000172	4	7	2	6	6	3	2	1	7	38
OG0000173	8	1	4	0	3	3	6	5	8	38
OG0000174	5	4	3	2	5	3	7	5	4	38
OG0000175	4	3	3	6	6	4	2	4	6	38
OG0000176	3	4	6	4	5	4	4	4	4	38
OG0000177	4	3	5	3	3	5	5	5	5	38
OG0000178	4	4	3	5	7	4	2	2	7	38
OG0000179	1	1	1	0	1	14	2	2	16	38
OG0000180	5	3	4	4	4	4	4	4	6	38
OG0000181	7	1	7	5	3	7	4	2	2	38
OG0000182	5	3	3	5	2	3	4	2	10	37
OG0000183	8	2	6	6	3	3	2	2	5	37
OG0000184	6	4	3	2	4	7	3	2	6	37
OG0000185	6	2	4	4	2	7	6	2	4	37
OG0000186	7	3	3	2	5	4	4	7	2	37
OG0000187	4	5	5	1	3	8	3	5	3	37
OG0000188	5	3	4	4	4	5	5	4	3	37
OG0000189	4	2	5	6	3	4	5	4	4	37
OG0000190	4	3	2	2	6	7	3	6	4	37
OG0000191	3	0	34	0	0	0	0	0	0	37
OG0000192	2	2	4	6	4	3	6	4	6	37
OG0000193	11	2	3	2	5	2	2	3	6	36
OG0000194	13	1	3	2	4	1	1	3	8	36
OG0000195	13	0	6	2	5	1	3	3	3	36
OG0000196	9	0	4	6	3	2	3	3	6	36
OG0000197	2	15	3	7	2	2	1	3	1	36
OG0000198	3	2	3	3	5	3	3	6	8	36
OG0000199	5	5	6	6	6	5	1	1	1	36
OG0000200	5	5	6	3	2	4	4	4	3	36
OG0000201	3	4	5	2	3	4	5	4	6	36
OG0000202	5	3	3	7	7	2	3	3	3	36
OG0000203	4	4	4	3	3	3	5	4	6	36
OG0000204	2	6	7	4	4	5	2	2	4	36
OG0000205	4	4	4	2	5	4	5	5	3	36
OG0000206	7	1	2	4	7	5	5	1	3	35
OG0000207	6	2	4	2	2	1	5	6	7	35
OG0000208	7	4	3	2	4	3	3	3	6	35
OG0000209	4	6	4	0	3	5	4	2	7	35
OG0000210	5	4	2	3	5	5	4	1	6	35
OG0000211	4	3	5	3	4	3	5	6	2	35
OG0000212	4	4	3	1	3	4	4	7	5	35
OG0000213	4	2	5	3	7	3	4	4	3	35
OG0000214	5	3	6	1	4	2	3	5	6	35
OG0000215	3	3	7	4	6	4	4	0	4	35
OG0000216	5	2	3	10	3	3	2	4	3	35
OG0000217	4	2	4	1	2	4	4	4	10	35
OG0000218	3	1	3	0	0	8	6	12	2	35
OG0000219	0	4	3	3	8	5	2	7	3	35
OG0000220	6	5	5	2	4	1	4	4	3	34
OG0000221	11	4	3	0	3	1	1	4	7	34
OG0000222	4	4	5	5	5	5	2	3	1	34
OG0000223	6	2	4	1	4	3	5	3	6	34
OG0000224	7	5	5	3	3	3	3	2	3	34
OG0000225	3	4	5	2	4	4	5	3	4	34
OG0000226	5	4	4	3	2	2	6	2	6	34
OG0000227	2	6	5	2	3	6	3	3	4	34
OG0000228	4	5	5	4	3	4	4	4	1	34
OG0000229	1	3	6	4	4	2	9	2	3	34
OG0000230	7	1	11	0	2	0	5	7	1	34
OG0000231	7	0	2	4	5	5	1	5	4	33
OG0000232	6	5	2	3	6	4	4	2	1	33
OG0000233	7	4	1	3	6	1	4	6	1	33
OG0000234	7	6	3	2	4	1	3	3	4	33
OG0000235	7	6	1	0	2	6	4	4	3	33
OG0000236	4	7	6	5	1	1	1	1	7	33
OG0000237	5	2	2	3	4	4	4	2	7	33
OG0000238	8	2	6	0	3	1	1	1	11	33
OG0000239	5	1	3	3	3	4	3	7	4	33
OG0000240	5	2	4	6	5	5	1	3	2	33
OG0000241	5	4	3	1	8	3	2	5	2	33
OG0000242	5	8	4	4	4	1	1	1	5	33
OG0000243	6	2	4	4	4	2	4	3	4	33
OG0000244	7	3	7	0	1	2	2	2	9	33
OG0000245	5	3	5	3	5	2	3	3	4	33
OG0000246	5	1	4	6	3	5	4	1	4	33
OG0000247	3	3	10	0	6	3	4	2	2	33
OG0000248	4	4	5	3	5	1	3	4	4	33
OG0000249	1	6	3	1	4	7	2	3	6	33
OG0000250	4	3	4	3	2	3	4	5	5	33
OG0000251	4	2	2	2	9	6	4	1	3	33
OG0000252	2	0	8	1	3	4	3	3	9	33
OG0000253	2	3	4	4	3	3	3	3	8	33
OG0000254	5	5	5	1	3	3	4	4	2	32
OG0000255	7	1	3	0	5	1	5	3	7	32
OG0000256	4	1	4	1	4	3	5	3	7	32
OG0000257	7	2	3	1	3	3	5	3	5	32
OG0000258	3	2	8	2	6	3	5	1	2	32
OG0000259	7	3	2	1	7	4	2	4	2	32
OG0000260	5	1	2	3	4	4	4	1	8	32
OG0000261	2	3	8	1	1	1	5	8	3	32
OG0000262	3	4	2	1	2	4	4	7	5	32
OG0000263	7	1	3	10	3	3	1	1	3	32
OG0000264	5	2	3	6	3	5	3	2	3	32
OG0000265	6	0	8	2	5	3	2	3	3	32
OG0000266	3	2	2	7	3	3	4	2	6	32
OG0000267	5	1	3	4	3	4	2	3	7	32
OG0000268	1	6	10	5	4	1	0	3	2	32
OG0000269	1	2	6	4	3	3	5	4	4	32
OG0000270	3	3	3	1	6	6	3	4	3	32
OG0000271	7	3	8	3	8	0	2	1	0	32
OG0000272	4	3	6	1	1	3	3	7	4	32
OG0000273	7	1	4	2	3	4	3	2	6	32
OG0000274	3	1	4	4	3	3	4	5	5	32
OG0000275	5	2	5	1	1	1	2	1	14	32
OG0000276	6	3	2	1	2	3	2	8	5	32
OG0000277	2	4	3	4	4	3	3	2	7	32
OG0000278	3	5	1	4	3	5	1	6	3	31
OG0000279	3	5	4	2	4	4	3	5	1	31
OG0000280	6	3	2	2	3	4	4	3	4	31
OG0000281	5	2	5	3	2	3	3	3	5	31
OG0000282	4	4	2	0	5	1	2	4	9	31
OG0000283	5	2	5	3	4	3	3	3	3	31
OG0000284	2	5	3	3	4	3	5	3	3	31
OG0000285	5	6	2	3	3	2	2	3	5	31
OG0000286	5	1	2	5	4	4	3	4	3	31
OG0000287	7	1	1	3	3	6	3	2	5	31
OG0000288	5	1	4	3	5	3	6	1	3	31
OG0000289	5	2	3	4	4	2	5	3	3	31
OG0000290	7	2	2	3	3	3	2	6	3	31
OG0000291	4	9	3	1	8	1	1	2	2	31
OG0000292	3	2	4	2	6	6	3	1	4	31
OG0000293	4	0	4	4	3	4	4	3	5	31
OG0000294	2	2	13	1	3	2	4	2	2	31
OG0000295	4	5	5	3	3	2	3	3	3	31
OG0000296	4	4	5	1	2	3	3	2	7	31
OG0000297	4	7	7	0	5	2	2	2	2	31
OG0000298	7	4	5	0	1	4	4	3	3	31
OG0000299	5	3	5	2	2	4	3	4	3	31
OG0000300	2	1	11	4	1	0	2	1	9	31
OG0000301	6	1	3	4	2	5	4	5	1	31
OG0000302	3	2	5	1	6	2	2	6	3	30
OG0000303	3	0	5	1	5	3	2	5	6	30
OG0000304	5	4	4	4	0	1	2	2	8	30
OG0000305	8	2	3	2	1	3	1	6	4	30
OG0000306	4	0	12	4	1	1	1	5	2	30
OG0000307	2	2	2	4	9	4	1	1	5	30
OG0000308	5	3	5	1	2	4	5	3	2	30
OG0000309	5	1	5	1	4	4	3	2	5	30
OG0000310	6	7	3	0	4	3	4	0	3	30
OG0000311	4	2	8	0	4	6	1	2	3	30
OG0000312	9	1	2	0	3	0	5	6	4	30
OG0000313	5	4	2	1	4	3	3	4	4	30
OG0000314	10	1	4	4	3	2	2	4	0	30
OG0000315	6	3	5	0	3	4	3	4	2	30
OG0000316	8	10	3	0	1	2	1	1	4	30
OG0000317	5	5	6	0	0	3	1	3	7	30
OG0000318	5	4	3	3	3	3	4	2	3	30
OG0000319	2	5	1	1	5	5	8	1	2	30
OG0000320	3	3	3	6	3	3	2	4	3	30
OG0000321	4	3	4	4	3	3	3	3	3	30
OG0000322	3	2	2	3	6	3	3	6	2	30
OG0000323	4	2	3	3	2	3	6	3	4	30
OG0000324	5	2	3	2	0	5	6	3	4	30
OG0000325	4	3	4	1	5	2	3	3	5	30
OG0000326	3	1	11	1	1	1	9	2	1	30
OG0000327	4	2	2	2	4	5	4	4	3	30
OG0000328	3	5	2	5	3	4	3	3	2	30
OG0000329	7	1	6	0	2	1	3	6	4	30
OG0000330	3	1	4	5	2	2	4	3	6	30
OG0000331	4	2	3	2	3	3	4	4	5	30
OG0000332	5	4	3	2	3	3	3	4	3	30
OG0000333	5	3	4	1	4	4	4	2	3	30
OG0000334	2	3	4	4	5	2	1	2	7	30
OG0000335	4	4	3	3	3	3	3	4	3	30
OG0000336	3	3	4	2	7	4	4	3	0	30
OG0000337	3	3	3	2	2	5	2	6	4	30
OG0000338	6	3	4	1	1	3	3	5	3	29
OG0000339	6	4	3	4	1	4	1	2	4	29
OG0000340	6	2	1	0	4	5	3	5	3	29
OG0000341	8	2	1	4	3	2	4	3	2	29
OG0000342	3	2	14	1	2	4	1	0	2	29
OG0000343	4	1	5	3	2	4	3	5	2	29
OG0000344	5	1	3	3	3	4	3	3	4	29
OG0000345	5	6	2	3	4	2	2	2	3	29
OG0000346	4	5	2	2	2	2	2	4	6	29
OG0000347	5	1	3	3	2	5	4	4	2	29
OG0000348	2	1	2	5	1	3	5	3	7	29
OG0000349	3	5	4	0	5	3	4	3	2	29
OG0000350	4	1	5	4	4	1	5	3	2	29
OG0000351	3	4	6	0	1	3	4	4	4	29
OG0000352	4	6	7	1	0	3	1	5	2	29
OG0000353	2	1	3	3	3	5	4	4	4	29
OG0000354	3	5	3	1	4	3	2	4	4	29
OG0000355	3	7	2	4	2	3	3	2	3	29
OG0000356	2	1	3	0	4	4	5	8	2	29
OG0000357	6	1	4	2	2	5	4	2	3	29
OG0000358	5	1	4	2	5	3	4	3	2	29
OG0000359	3	2	4	3	2	3	4	4	4	29
OG0000360	6	3	7	1	4	3	3	2	0	29
OG0000361	5	4	4	3	4	1	2	1	4	28
OG0000362	5	7	2	2	1	4	2	0	5	28
OG0000363	3	5	2	3	2	3	3	2	5	28
OG0000364	6	5	5	3	3	0	1	1	4	28
OG0000365	7	1	4	2	3	1	3	2	5	28
OG0000366	1	1	10	1	2	3	6	2	2	28
OG0000367	4	3	2	5	3	4	2	2	3	28
OG0000368	1	3	4	3	2	3	5	5	2	28
OG0000369	4	4	3	4	3	1	4	2	3	28
OG0000370	5	3	1	4	3	3	1	3	5	28
OG0000371	5	1	1	5	5	3	3	3	2	28
OG0000372	3	1	3	3	2	4	3	3	6	28
OG0000373	2	5	4	3	2	1	3	3	5	28
OG0000374	4	5	3	0	4	2	5	4	1	28
OG0000375	2	1	3	6	1	4	3	6	2	28
OG0000376	3	2	3	6	4	2	3	3	2	28
OG0000377	3	3	3	4	3	3	3	3	3	28
OG0000378	1	3	4	2	6	3	3	3	3	28
OG0000379	2	0	4	3	3	2	5	6	3	28
OG0000380	3	1	6	0	4	6	2	0	6	28
OG0000381	3	3	3	4	5	2	2	2	4	28
OG0000382	1	1	3	8	3	3	3	3	3	28
OG0000383	2	1	6	7	3	2	2	2	3	28
OG0000384	3	4	3	5	4	2	4	0	3	28
OG0000385	6	5	2	0	2	1	0	3	8	27
OG0000386	12	2	1	1	0	1	2	5	3	27
OG0000387	6	3	5	3	2	2	3	2	1	27
OG0000388	5	3	6	5	3	0	1	2	2	27
OG0000389	5	1	3	3	4	1	4	3	3	27
OG0000390	4	3	4	2	3	4	2	1	4	27
OG0000391	4	3	3	1	3	3	3	3	4	27
OG0000392	5	1	3	2	5	4	3	3	1	27
OG0000393	7	3	4	1	2	1	1	1	7	27
OG0000394	7	3	2	2	3	4	2	3	1	27
OG0000395	6	1	4	0	2	1	1	4	8	27
OG0000396	3	1	3	5	4	3	3	4	1	27
OG0000397	4	3	3	3	3	3	2	2	4	27
OG0000398	3	2	3	3	4	4	4	1	3	27
OG0000399	3	4	3	2	4	3	3	2	3	27
OG0000400	5	4	2	2	5	3	3	2	1	27
OG0000401	3	3	2	0	4	3	2	4	6	27
OG0000402	5	2	2	3	3	3	2	3	4	27
OG0000403	3	4	3	2	3	3	3	3	3	27
OG0000404	2	6	3	2	3	1	2	3	5	27
OG0000405	3	4	3	3	3	3	3	3	2	27
OG0000406	5	5	2	3	3	2	2	2	3	27
OG0000407	3	4	3	3	3	3	3	3	2	27
OG0000408	5	1	1	4	1	5	3	1	6	27
OG0000409	6	2	1	3	0	4	1	3	7	27
OG0000410	4	1	4	1	4	2	4	2	5	27
OG0000411	2	3	3	2	4	3	4	2	4	27
OG0000412	5	1	3	4	3	3	3	1	4	27
OG0000413	3	3	3	4	2	3	6	3	0	27
OG0000414	5	2	7	2	2	3	2	2	2	27
OG0000415	3	2	2	1	5	3	3	3	5	27
OG0000416	1	3	6	0	2	1	8	2	4	27
OG0000417	2	2	5	0	2	4	1	3	8	27
OG0000418	4	3	2	5	4	1	2	2	4	27
OG0000419	3	6	2	3	2	1	1	3	6	27
OG0000420	2	1	5	5	2	2	3	4	3	27
OG0000421	5	2	6	1	3	1	5	2	2	27
OG0000422	4	1	4	4	4	2	3	3	2	27
OG0000423	3	3	3	3	3	3	3	3	3	27
OG0000424	9	1	2	1	3	4	1	1	4	26
OG0000425	4	3	3	3	2	3	2	4	2	26
OG0000426	2	3	6	2	4	1	3	1	4	26
OG0000427	2	3	3	4	3	3	4	2	2	26
OG0000428	4	2	3	3	3	3	4	2	2	26
OG0000429	3	4	6	3	1	1	2	1	5	26
OG0000430	4	2	4	6	3	2	3	1	1	26
OG0000431	4	7	8	0	1	4	1	1	0	26
OG0000432	4	3	4	1	2	5	2	2	3	26
OG0000433	4	2	4	2	2	4	2	4	2	26
OG0000434	4	3	1	6	1	1	3	4	3	26
OG0000435	2	3	3	4	3	2	5	2	2	26
OG0000436	5	1	5	1	2	2	5	2	3	26
OG0000437	5	2	1	4	1	4	2	1	6	26
OG0000438	4	2	3	3	4	3	2	3	2	26
OG0000439	1	5	2	1	4	4	3	3	3	26
OG0000440	4	1	3	0	2	3	5	4	4	26
OG0000441	4	1	3	2	2	3	3	3	5	26
OG0000442	2	3	1	5	5	2	2	3	3	26
OG0000443	3	5	3	2	4	2	2	2	3	26
OG0000444	3	4	3	1	3	3	3	3	3	26
OG0000445	6	1	4	0	4	2	3	5	1	26
OG0000446	2	6	4	1	2	3	2	4	2	26
OG0000447	3	1	3	3	2	3	3	3	5	26
OG0000448	4	1	4	4	3	2	4	2	2	26
OG0000449	2	1	5	2	4	4	3	0	5	26
OG0000450	3	2	1	4	2	4	3	5	2	26
OG0000451	1	0	5	4	4	2	1	2	7	26
OG0000452	2	3	2	4	2	4	2	5	2	26
OG0000453	5	3	2	2	3	4	1	1	4	25
OG0000454	5	2	2	2	3	1	2	4	4	25
OG0000455	3	0	2	6	2	4	2	4	2	25
OG0000456	3	2	7	0	1	3	4	1	4	25
OG0000457	7	0	4	5	0	2	3	4	0	25
OG0000458	3	2	2	3	2	4	3	3	3	25
OG0000459	7	1	0	4	0	4	1	3	5	25
OG0000460	5	3	1	3	3	2	3	2	3	25
OG0000461	6	3	2	0	3	6	1	2	2	25
OG0000462	4	2	1	0	1	2	4	8	3	25
OG0000463	1	8	1	6	3	2	2	1	1	25
OG0000464	3	3	5	3	4	4	3	0	0	25
OG0000465	3	2	3	3	3	2	4	3	2	25
OG0000466	2	0	3	2	4	3	3	3	5	25
OG0000467	4	1	4	2	4	3	4	1	2	25
OG0000468	3	8	1	3	1	1	1	3	4	25
OG0000469	6	3	4	2	2	2	2	2	2	25
OG0000470	2	3	2	5	3	1	2	2	5	25
OG0000471	5	2	5	1	3	2	3	2	2	25
OG0000472	3	2	3	4	3	2	3	2	3	25
OG0000473	3	2	3	6	2	2	2	2	3	25
OG0000474	5	3	5	3	1	2	3	2	1	25
OG0000475	2	2	2	7	4	2	2	2	2	25
OG0000476	4	3	2	2	2	3	3	4	2	25
OG0000477	2	1	4	3	5	1	2	4	3	25
OG0000478	3	1	3	2	3	3	3	4	3	25
OG0000479	3	1	4	2	3	4	1	4	3	25
OG0000480	4	2	4	3	2	2	2	4	2	25
OG0000481	4	3	3	1	3	3	3	2	3	25
OG0000482	1	2	2	2	4	2	3	4	5	25
OG0000483	1	1	2	5	1	2	6	3	4	25
OG0000484	2	3	3	3	3	3	3	2	3	25
OG0000485	3	2	3	2	2	2	2	3	6	25
OG0000486	6	4	4	0	1	3	3	2	2	25
OG0000487	2	3	4	3	2	2	3	3	3	25
OG0000488	9	2	2	0	4	1	5	2	0	25
OG0000489	2	3	4	3	3	2	4	2	2	25
OG0000490	3	3	2	2	2	2	3	2	6	25
OG0000491	3	3	2	2	3	1	2	2	7	25
OG0000492	1	0	3	0	5	3	2	4	7	25
OG0000493	1	6	1	1	4	2	4	4	2	25
OG0000494	0	3	4	2	3	6	2	1	4	25
OG0000495	3	3	3	4	1	2	3	3	2	24
OG0000496	12	1	3	0	1	1	2	2	2	24
OG0000497	4	5	6	0	4	1	0	3	1	24
OG0000498	5	0	1	1	2	3	2	1	9	24
OG0000499	4	2	3	2	3	1	3	2	4	24
OG0000500	4	1	2	2	3	2	5	2	3	24
OG0000501	3	2	3	1	3	3	3	4	2	24
OG0000502	3	0	1	5	1	2	3	8	1	24
OG0000503	3	1	4	4	3	2	3	0	4	24
OG0000504	4	0	1	1	3	4	1	7	3	24
OG0000505	4	1	2	2	2	4	3	3	3	24
OG0000506	6	1	1	1	2	5	2	1	5	24
OG0000507	4	3	3	1	3	3	3	3	1	24
OG0000508	2	0	2	4	3	3	3	3	4	24
OG0000509	4	2	1	2	2	1	2	3	7	24
OG0000510	3	3	3	2	2	3	3	2	3	24
OG0000511	2	2	4	1	8	2	1	2	2	24
OG0000512	3	3	3	2	4	2	2	3	2	24
OG0000513	4	2	5	1	5	2	2	2	1	24
OG0000514	6	2	3	0	3	3	3	1	3	24
OG0000515	2	5	3	0	2	5	1	4	2	24
OG0000516	3	1	2	4	3	3	1	2	5	24
OG0000517	4	2	4	1	2	4	3	3	1	24
OG0000518	2	3	3	4	2	2	2	4	2	24
OG0000519	3	4	1	2	4	2	2	3	3	24
OG0000520	2	1	2	4	3	5	4	2	1	24
OG0000521	2	4	2	4	1	3	3	1	4	24
OG0000522	3	4	4	0	3	0	3	3	4	24
OG0000523	4	1	4	2	2	2	5	3	1	24
OG0000524	4	2	3	2	1	3	2	2	5	24
OG0000525	5	1	5	1	2	2	3	3	2	24
OG0000526	3	3	3	0	3	3	1	4	4	24
OG0000527	4	1	4	3	2	2	3	2	3	24
OG0000528	3	4	3	3	1	3	4	2	1	24
OG0000529	4	5	2	2	3	2	3	2	1	24
OG0000530	3	2	3	3	2	4	3	1	3	24
OG0000531	3	6	2	4	4	1	1	1	2	24
OG0000532	2	3	1	3	3	2	3	4	3	24
OG0000533	3	2	3	2	2	3	3	4	2	24
OG0000534	4	1	4	2	3	3	4	3	0	24
OG0000535	3	3	4	1	1	3	1	5	3	24
OG0000536	2	1	2	3	4	4	3	3	2	24
OG0000537	3	3	2	1	3	1	3	3	5	24
OG0000538	3	4	3	3	4	2	2	3	0	24
OG0000539	1	3	1	3	10	1	1	4	0	24
OG0000540	5	1	4	2	0	3	5	1	3	24
OG0000541	1	2	2	4	3	2	3	4	3	24
OG0000542	3	2	3	3	3	3	3	2	2	24
OG0000543	2	3	3	5	2	1	3	2	2	23
OG0000544	5	3	0	3	4	3	1	2	2	23
OG0000545	6	2	2	1	1	2	2	2	5	23
OG0000546	9	2	4	1	2	3	0	2	0	23
OG0000547	6	2	3	1	2	1	3	2	3	23
OG0000548	6	1	4	2	3	3	3	0	1	23
OG0000549	4	1	2	3	2	3	2	4	2	23
OG0000550	4	1	3	1	2	4	2	1	5	23
OG0000551	6	2	0	0	4	3	2	4	2	23
OG0000552	4	1	5	2	2	1	4	1	3	23
OG0000553	2	2	4	1	5	2	2	2	3	23
OG0000554	6	2	2	2	4	1	2	2	2	23
OG0000555	4	2	3	4	2	1	3	0	4	23
OG0000556	4	1	3	5	2	2	2	1	3	23
OG0000557	3	4	4	1	2	2	2	2	3	23
OG0000558	3	3	2	3	2	3	2	2	3	23
OG0000559	3	2	2	4	1	3	2	3	3	23
OG0000560	9	0	2	1	5	2	0	1	3	23
OG0000561	1	0	11	6	4	0	1	0	0	23
OG0000562	4	0	4	1	6	1	0	5	2	23
OG0000563	4	2	3	3	2	3	3	1	2	23
OG0000564	3	2	4	1	2	2	4	3	2	23
OG0000565	4	1	2	3	2	2	2	2	5	23
OG0000566	5	1	1	1	5	3	4	3	0	23
OG0000567	3	3	1	6	2	4	1	1	2	23
OG0000568	3	1	4	2	2	1	4	4	2	23
OG0000569	3	1	2	3	5	2	2	0	5	23
OG0000570	5	2	2	2	4	2	2	2	2	23
OG0000571	4	1	2	0	1	6	2	4	3	23
OG0000572	7	0	3	2	4	3	2	2	0	23
OG0000573	2	2	4	3	3	1	3	1	4	23
OG0000574	4	0	2	2	4	4	4	3	0	23
OG0000575	2	3	0	4	2	4	2	2	4	23
OG0000576	3	3	1	1	5	3	1	6	0	23
OG0000577	2	2	3	4	4	5	1	0	2	23
OG0000578	3	4	2	2	1	3	1	3	4	23
OG0000579	2	4	3	2	2	4	1	4	1	23
OG0000580	2	2	2	2	2	4	2	5	2	23
OG0000581	4	5	1	2	5	4	0	1	1	23
OG0000582	3	4	2	3	6	1	1	1	2	23
OG0000583	7	1	2	1	3	2	3	3	1	23
OG0000584	4	2	3	2	2	3	3	2	2	23
OG0000585	2	3	1	3	3	3	3	2	3	23
OG0000586	5	1	3	3	1	3	4	1	2	23
OG0000587	2	2	1	2	4	2	2	2	6	23
OG0000588	2	2	2	3	2	2	2	2	6	23
OG0000589	3	2	3	2	2	3	2	3	3	23
OG0000590	3	2	2	1	2	3	5	2	3	23
OG0000591	6	1	3	2	5	2	2	1	1	23
OG0000592	4	0	2	2	7	1	1	5	1	23
OG0000593	3	2	2	1	4	3	3	2	3	23
OG0000594	2	2	2	2	3	2	5	3	2	23
OG0000595	3	1	6	1	2	2	2	3	3	23
OG0000596	5	1	3	2	3	2	1	4	2	23
OG0000597	4	3	2	3	2	2	2	2	3	23
OG0000598	5	1	5	0	5	1	2	3	1	23
OG0000599	1	1	2	3	5	2	2	5	2	23
OG0000600	4	2	2	2	2	2	2	3	4	23
OG0000601	3	4	4	4	4	0	1	1	2	23
OG0000602	4	1	4	2	3	3	2	2	2	23
OG0000603	3	3	3	1	1	4	3	3	2	23
OG0000604	3	2	2	2	2	2	4	2	4	23
OG0000605	2	1	3	1	5	2	5	3	1	23
OG0000606	4	3	3	2	2	2	3	2	2	23
OG0000607	1	4	2	1	8	2	0	3	2	23
OG0000608	1	4	2	2	2	1	3	4	4	23
OG0000609	1	0	2	5	1	6	2	3	3	23
OG0000610	3	2	3	3	2	3	2	3	2	23
OG0000611	1	3	5	3	1	1	5	3	1	23
OG0000612	22	0	0	0	0	0	0	0	0	22
OG0000613	4	2	3	3	3	3	2	1	1	22
OG0000614	5	3	3	0	3	2	2	2	2	22
OG0000615	5	2	3	0	3	2	5	1	1	22
OG0000616	5	1	4	2	3	2	2	0	3	22
OG0000617	9	4	3	0	2	0	1	0	3	22
OG0000618	2	1	6	2	0	5	3	1	2	22
OG0000619	15	1	3	1	0	0	0	0	2	22
OG0000620	4	1	3	0	4	3	3	1	3	22
OG0000621	4	2	2	1	2	3	2	2	4	22
OG0000622	2	5	2	2	1	2	2	1	5	22
OG0000623	5	1	2	0	2	2	2	1	7	22
OG0000624	4	2	2	1	2	4	2	2	3	22
OG0000625	6	2	5	0	4	1	0	1	3	22
OG0000626	4	1	2	2	3	2	2	1	5	22
OG0000627	4	1	0	0	4	3	2	2	6	22
OG0000628	5	2	2	2	2	2	2	2	3	22
OG0000629	4	3	2	3	2	3	3	1	1	22
OG0000630	2	1	1	4	4	1	1	3	5	22
OG0000631	2	1	2	3	2	2	3	2	5	22
OG0000632	1	3	0	4	4	2	5	1	2	22
OG0000633	6	2	2	3	2	3	1	1	2	22
OG0000634	5	1	2	2	4	1	1	4	2	22
OG0000635	3	5	2	0	2	3	0	2	5	22
OG0000636	4	2	2	3	2	2	3	2	2	22
OG0000637	1	2	1	9	1	2	1	3	2	22
OG0000638	4	2	2	2	4	1	2	2	3	22
OG0000639	4	0	2	1	1	5	2	7	0	22
OG0000640	5	1	3	1	1	1	1	3	6	22
OG0000641	4	2	3	0	2	3	3	5	0	22
OG0000642	2	2	3	2	2	3	3	3	2	22
OG0000643	3	3	3	3	3	3	2	1	1	22
OG0000644	2	2	3	0	4	2	1	3	5	22
OG0000645	4	2	2	3	1	3	2	2	3	22
OG0000646	4	3	2	1	3	3	2	2	2	22
OG0000647	4	2	2	2	2	3	2	2	3	22
OG0000648	2	2	2	2	2	3	3	3	3	22
OG0000649	1	2	4	3	0	3	4	2	3	22
OG0000650	4	1	2	2	2	2	4	2	3	22
OG0000651	1	20	0	0	0	0	0	0	1	22
OG0000652	4	0	7	3	2	3	2	0	1	22
OG0000653	1	2	3	1	3	3	3	3	3	22
OG0000654	2	3	3	2	2	2	3	2	3	22
OG0000655	3	2	1	4	2	2	4	1	3	22
OG0000656	2	2	0	4	3	3	2	1	5	22
OG0000657	2	3	2	2	2	3	2	3	3	22
OG0000658	3	0	5	1	1	3	2	3	4	22
OG0000659	3	4	1	3	2	4	2	1	2	22
OG0000660	1	1	5	2	1	4	1	3	4	22
OG0000661	5	2	2	3	1	2	3	1	3	22
OG0000662	3	3	2	2	3	2	2	3	2	22
OG0000663	3	1	2	2	2	3	2	2	5	22
OG0000664	4	3	1	0	5	2	2	2	3	22
OG0000665	2	2	2	3	2	2	4	3	2	22
OG0000666	4	2	2	2	3	2	3	2	2	22
OG0000667	2	4	2	3	1	1	2	1	6	22
OG0000668	2	4	1	0	3	2	2	4	4	22
OG0000669	3	2	3	3	2	2	3	3	1	22
OG0000670	2	2	2	1	3	3	2	3	4	22
OG0000671	1	3	1	1	1	2	3	3	7	22
OG0000672	2	1	4	2	1	2	4	4	2	22
OG0000673	2	4	2	2	3	2	3	2	2	22
OG0000674	4	2	2	2	3	2	2	4	1	22
OG0000675	3	2	2	4	3	1	3	3	1	22
OG0000676	2	1	2	5	2	3	3	3	1	22
OG0000677	3	3	3	2	3	3	2	1	2	22
OG0000678	4	1	3	2	5	2	3	2	0	22
OG0000679	4	2	2	3	2	2	2	2	3	22
OG0000680	2	5	3	2	2	2	2	2	2	22
OG0000681	5	2	2	1	2	2	4	3	1	22
OG0000682	2	3	2	2	2	2	2	3	4	22
OG0000683	0	2	5	0	1	5	2	2	5	22
OG0000684	0	1	1	1	1	2	11	5	0	22
OG0000685	0	3	0	3	6	6	1	0	3	22
OG0000686	6	3	4	0	1	2	1	2	2	21
OG0000687	5	0	3	4	2	2	2	2	1	21
OG0000688	3	2	3	1	2	2	4	4	0	21
OG0000689	4	3	1	2	1	1	2	0	7	21
OG0000690	10	2	1	4	1	1	0	1	1	21
OG0000691	5	1	4	2	1	0	2	4	2	21
OG0000692	4	1	3	2	4	1	4	1	1	21
OG0000693	3	1	1	2	0	4	0	3	7	21
OG0000694	4	0	2	2	1	7	1	2	2	21
OG0000695	3	1	2	3	0	0	2	5	5	21
OG0000696	5	3	3	2	2	2	0	3	1	21
OG0000697	3	2	2	4	2	2	2	2	2	21
OG0000698	4	1	3	4	3	1	2	1	2	21
OG0000699	3	4	2	1	2	2	2	3	2	21
OG0000700	2	0	7	5	1	4	2	0	0	21
OG0000701	4	2	3	3	3	1	2	1	2	21
OG0000702	6	2	2	4	2	1	2	2	0	21
OG0000703	3	2	2	2	3	3	2	2	2	21
OG0000704	3	2	3	3	2	3	2	1	2	21
OG0000705	5	1	2	2	2	4	1	1	3	21
OG0000706	4	0	3	1	3	2	4	2	2	21
OG0000707	4	2	3	1	3	2	3	1	2	21
OG0000708	5	1	3	2	1	3	2	1	3	21
OG0000709	3	2	2	3	2	2	2	2	3	21
OG0000710	1	2	1	5	1	2	1	1	7	21
OG0000711	5	2	3	1	0	2	4	1	3	21
OG0000712	6	3	1	3	0	1	2	3	2	21
OG0000713	4	3	3	1	1	2	3	1	3	21
OG0000714	1	1	2	3	1	4	2	3	4	21
OG0000715	2	1	2	2	2	3	3	3	3	21
OG0000716	2	3	1	0	3	2	2	2	6	21
OG0000717	3	3	2	3	1	2	2	3	2	21
OG0000718	4	3	2	3	0	2	0	2	5	21
OG0000719	7	2	3	0	2	0	4	0	3	21
OG0000720	3	3	3	3	1	1	3	0	4	21
OG0000721	3	4	2	3	3	1	1	1	3	21
OG0000722	4	3	2	2	2	3	2	3	0	21
OG0000723	2	1	3	3	2	3	3	2	2	21
OG0000724	2	1	3	4	0	2	3	2	4	21
OG0000725	2	6	4	0	4	1	1	1	2	21
OG0000726	2	0	4	3	3	2	3	2	2	21
OG0000727	4	3	2	1	1	4	1	1	4	21
OG0000728	4	2	0	2	2	3	2	4	2	21
OG0000729	3	3	2	2	2	2	2	2	3	21
OG0000730	3	2	3	2	2	4	2	2	1	21
OG0000731	2	5	2	0	3	3	1	2	3	21
OG0000732	3	2	4	2	2	2	2	1	3	21
OG0000733	2	1	4	2	3	2	2	2	3	21
OG0000734	2	2	4	1	2	2	2	2	4	21
OG0000735	1	2	2	2	2	5	3	3	1	21
OG0000736	1	3	1	1	3	2	1	2	7	21
OG0000737	2	1	2	2	1	4	2	3	4	21
OG0000738	4	1	3	1	3	1	3	1	4	21
OG0000739	4	2	2	3	2	2	2	2	2	21
OG0000740	2	2	2	0	2	2	2	2	7	21
OG0000741	3	2	4	2	3	2	2	2	1	21
OG0000742	3	0	3	2	3	3	2	4	1	21
OG0000743	3	1	2	1	2	3	3	3	3	21
OG0000744	3	1	1	3	4	2	2	3	2	21
OG0000745	1	3	2	1	10	1	0	1	2	21
OG0000746	3	1	1	2	6	2	3	1	2	21
OG0000747	4	2	2	2	2	2	2	2	3	21
OG0000748	4	0	4	1	1	1	3	3	4	21
OG0000749	1	5	2	0	2	4	1	4	2	21
OG0000750	5	1	4	1	3	2	2	1	2	21
OG0000751	3	1	4	1	3	2	3	3	1	21
OG0000752	3	3	3	3	3	1	1	1	3	21
OG0000753	3	7	1	1	1	2	1	2	3	21
OG0000754	4	1	3	1	2	3	2	2	3	21
OG0000755	2	7	2	3	2	1	1	1	2	21
OG0000756	3	2	3	3	3	1	3	3	0	21
OG0000757	2	1	2	2	2	2	2	1	7	21
OG0000758	3	1	3	2	3	2	2	4	1	21
OG0000759	1	1	3	3	4	3	2	1	3	21
OG0000760	2	1	2	1	2	2	2	2	7	21
OG0000761	1	1	2	2	2	2	2	2	7	21
OG0000762	0	5	2	2	5	0	0	3	4	21
OG0000763	0	2	1	2	0	4	6	3	3	21
OG0000764	10	1	5	0	0	1	2	0	1	20
OG0000765	2	3	3	4	1	2	2	2	1	20
OG0000766	2	3	4	0	0	1	2	3	5	20
OG0000767	8	1	1	0	1	4	1	2	2	20
OG0000768	3	3	2	3	1	2	3	3	0	20
OG0000769	1	1	4	0	3	1	3	2	5	20
OG0000770	4	2	5	1	0	0	3	0	5	20
OG0000771	4	3	1	1	4	1	3	3	0	20
OG0000772	3	2	1	2	2	2	2	2	4	20
OG0000773	13	0	1	2	0	0	0	2	2	20
OG0000774	6	2	3	1	1	2	2	3	0	20
OG0000775	2	1	3	2	2	1	2	3	4	20
OG0000776	5	1	0	6	3	1	1	2	1	20
OG0000777	2	1	2	1	2	1	3	2	6	20
OG0000778	5	0	2	3	1	4	1	2	2	20
OG0000779	2	1	4	2	2	4	3	1	1	20
OG0000780	4	2	2	1	2	2	3	2	2	20
OG0000781	4	1	3	1	3	1	3	2	2	20
OG0000782	5	1	2	2	0	3	2	3	2	20
OG0000783	3	3	2	0	2	2	5	2	1	20
OG0000784	4	0	2	3	0	3	3	1	4	20
OG0000785	2	0	3	4	1	3	3	3	1	20
OG0000786	7	1	3	1	5	0	0	1	2	20
OG0000787	4	1	3	3	3	2	1	2	1	20
OG0000788	4	1	1	3	3	1	2	1	4	20
OG0000789	5	0	2	3	3	2	3	2	0	20
OG0000790	3	2	3	2	1	1	3	1	4	20
OG0000791	3	1	2	1	2	3	1	3	4	20
OG0000792	4	1	2	1	2	2	2	2	4	20
OG0000793	5	0	2	1	2	2	1	5	2	20
OG0000794	1	1	3	1	3	1	3	3	4	20
OG0000795	4	1	3	1	2	3	2	3	1	20
OG0000796	2	6	2	2	2	1	1	3	1	20
OG0000797	2	4	1	3	2	2	3	2	1	20
OG0000798	2	1	4	2	2	2	1	2	4	20
OG0000799	3	1	2	4	2	2	2	0	4	20
OG0000800	2	1	2	2	2	2	2	4	3	20
OG0000801	3	1	4	1	2	1	2	3	3	20
OG0000802	2	3	2	2	2	2	2	2	3	20
OG0000803	2	2	2	5	2	2	2	3	0	20
OG0000804	2	2	2	3	3	2	2	2	2	20
OG0000805	2	3	2	2	2	2	2	2	3	20
OG0000806	4	2	4	2	1	3	2	2	0	20
OG0000807	5	1	3	2	4	1	1	1	2	20
OG0000808	3	1	4	2	1	1	3	1	4	20
OG0000809	2	2	1	2	2	5	1	4	1	20
OG0000810	2	1	1	10	1	1	1	1	2	20
OG0000811	3	1	3	0	3	2	3	2	3	20
OG0000812	3	2	3	4	1	2	2	2	1	20
OG0000813	3	0	2	0	3	3	2	4	3	20
OG0000814	4	3	1	0	3	2	2	1	4	20
OG0000815	2	1	1	1	2	4	2	5	2	20
OG0000816	2	1	3	4	2	1	2	3	2	20
OG0000817	4	0	1	2	3	2	4	3	1	20
OG0000818	3	1	1	3	3	1	2	4	2	20
OG0000819	3	2	4	1	3	0	5	1	1	20
OG0000820	4	2	2	1	3	1	2	0	5	20
OG0000821	3	2	1	2	2	4	3	1	2	20
OG0000822	3	3	3	1	2	2	2	1	3	20
OG0000823	1	2	4	2	2	3	2	2	2	20
OG0000824	4	2	1	3	1	2	1	2	4	20
OG0000825	2	3	1	1	4	2	4	2	1	20
OG0000826	3	1	2	4	1	3	1	3	2	20
OG0000827	3	0	3	3	2	4	2	2	1	20
OG0000828	3	3	2	3	2	2	1	2	2	20
OG0000829	3	3	1	1	2	2	2	1	5	20
OG0000830	3	2	2	2	2	2	2	2	3	20
OG0000831	2	2	2	2	2	2	2	3	3	20
OG0000832	1	1	3	3	3	3	2	2	2	20
OG0000833	2	3	2	4	2	3	2	2	0	20
OG0000834	2	2	1	5	3	1	1	3	2	20
OG0000835	2	2	4	2	4	1	1	1	3	20
OG0000836	5	1	2	2	2	2	2	3	1	20
OG0000837	6	0	8	0	0	0	1	5	0	20
OG0000838	4	1	2	2	3	2	2	2	2	20
OG0000839	3	0	0	2	5	3	3	3	1	20
OG0000840	2	2	2	2	2	2	2	2	4	20
OG0000841	4	3	4	0	2	2	2	2	1	20
OG0000842	3	0	1	2	3	2	2	3	4	20
OG0000843	1	4	4	0	2	5	2	2	0	20
OG0000844	3	2	2	4	1	3	3	1	1	20
OG0000845	4	1	1	3	4	1	2	0	4	20
OG0000846	1	2	3	1	2	2	6	1	2	20
OG0000847	3	2	2	2	2	2	2	2	3	20
OG0000848	4	1	1	4	2	2	2	3	1	20
OG0000849	2	0	4	1	3	3	3	3	1	20
OG0000850	2	3	2	4	2	2	2	2	1	20
OG0000851	2	2	2	2	2	2	2	2	4	20
OG0000852	4	1	2	3	2	2	2	2	2	20
OG0000853	3	2	3	1	2	3	2	3	1	20
OG0000854	2	3	4	2	2	2	1	3	1	20
OG0000855	3	3	3	3	1	2	2	0	3	20
OG0000856	4	2	3	1	3	1	2	2	2	20
OG0000857	2	2	3	3	1	3	2	2	2	20
OG0000858	1	3	3	2	5	3	2	0	1	20
OG0000859	3	3	3	1	3	2	2	2	1	20
OG0000860	3	3	3	3	2	1	2	2	1	20
OG0000861	2	4	1	2	2	3	2	3	1	20
OG0000862	2	1	2	4	2	2	3	2	2	20
OG0000863	3	1	2	1	2	4	2	3	2	20
OG0000864	3	4	2	2	1	2	2	2	2	20
OG0000865	2	3	2	1	2	2	2	3	3	20
OG0000866	2	3	2	2	2	2	1	3	3	20
OG0000867	2	2	2	4	2	3	1	2	2	20
OG0000868	2	2	3	2	3	2	2	2	2	20
OG0000869	1	2	2	1	0	4	1	5	4	20
OG0000870	2	0	2	1	2	5	3	2	3	20
OG0000871	4	0	3	1	2	1	1	3	4	19
OG0000872	5	1	2	1	2	1	3	2	2	19
OG0000873	5	3	2	1	1	2	2	1	2	19
OG0000874	2	2	2	1	2	3	2	5	0	19
OG0000875	3	1	3	2	3	3	3	0	1	19
OG0000876	4	0	4	1	1	2	4	3	0	19
OG0000877	6	0	3	3	1	1	3	1	1	19
OG0000878	5	3	1	0	1	4	2	1	2	19
OG0000879	5	0	3	1	3	0	3	1	3	19
OG0000880	2	1	3	2	2	2	2	1	4	19
OG0000881	2	3	1	1	1	3	1	2	5	19
OG0000882	2	1	1	5	2	3	1	3	1	19
OG0000883	7	2	0	1	1	4	0	1	3	19
OG0000884	5	2	2	1	2	1	2	2	2	19
OG0000885	3	2	2	3	0	2	2	2	3	19
OG0000886	4	1	1	0	2	0	3	3	5	19
OG0000887	4	1	3	3	2	1	3	1	1	19
OG0000888	4	3	1	1	3	2	3	1	1	19
OG0000889	5	1	2	1	2	0	3	2	3	19
OG0000890	3	2	2	0	2	5	0	1	4	19
OG0000891	3	2	2	0	2	5	0	1	4	19
OG0000892	3	0	3	1	3	4	1	3	1	19
OG0000893	3	0	2	2	2	4	1	3	2	19
OG0000894	3	2	1	2	1	2	1	3	4	19
OG0000895	2	7	2	3	1	0	1	1	2	19
OG0000896	4	3	1	6	1	1	1	1	1	19
OG0000897	3	1	3	1	1	1	5	1	3	19
OG0000898	7	0	1	2	1	4	3	0	1	19
OG0000899	3	0	3	2	2	2	2	2	3	19
OG0000900	5	1	2	2	1	1	2	1	4	19
OG0000901	3	3	1	1	1	3	3	1	3	19
OG0000902	3	1	4	1	3	3	2	1	1	19
OG0000903	3	2	3	1	1	2	2	2	3	19
OG0000904	4	2	1	1	2	3	1	2	3	19
OG0000905	2	3	2	2	1	2	3	2	2	19
OG0000906	2	2	2	2	3	2	2	2	2	19
OG0000907	1	3	3	0	2	3	4	1	2	19
OG0000908	2	3	4	2	2	1	3	1	1	19
OG0000909	4	1	2	0	4	2	3	2	1	19
OG0000910	3	3	2	4	2	2	2	1	0	19
OG0000911	2	2	2	2	3	2	2	2	2	19
OG0000912	4	1	2	2	4	2	2	1	1	19
OG0000913	3	2	2	2	2	2	2	2	2	19
OG0000914	1	2	1	3	3	2	2	2	3	19
OG0000915	2	1	2	2	2	4	1	2	3	19
OG0000916	2	2	3	2	2	1	3	3	1	19
OG0000917	1	1	2	0	3	3	2	2	5	19
OG0000918	2	2	2	2	2	2	2	2	3	19
OG0000919	1	2	1	3	2	2	3	1	4	19
OG0000920	2	3	2	3	2	2	2	1	2	19
OG0000921	2	3	2	2	2	2	2	2	2	19
OG0000922	1	1	2	2	2	7	2	1	1	19
OG0000923	2	1	4	3	3	3	1	1	1	19
OG0000924	2	3	1	2	2	2	3	1	3	19
OG0000925	3	2	2	2	2	2	2	2	2	19
OG0000926	1	1	3	3	2	2	3	3	1	19
OG0000927	3	2	4	5	3	0	1	0	1	19
OG0000928	3	3	1	1	3	3	1	2	2	19
OG0000929	3	1	1	7	1	2	1	1	2	19
OG0000930	4	2	2	2	2	1	2	2	2	19
OG0000931	2	4	3	3	3	1	1	1	1	19
OG0000932	2	1	3	4	1	2	2	2	2	19
OG0000933	2	1	2	3	2	4	2	2	1	19
OG0000934	2	2	2	2	2	2	2	2	3	19
OG0000935	2	3	2	2	2	2	2	2	2	19
OG0000936	2	2	2	2	2	2	2	2	3	19
OG0000937	1	4	2	0	3	4	2	0	3	19
OG0000938	2	1	2	2	2	2	2	2	4	19
OG0000939	3	1	3	1	2	2	1	1	5	19
OG0000940	1	2	2	2	2	3	2	1	4	19
OG0000941	3	1	2	1	3	2	2	2	3	19
OG0000942	1	0	2	3	0	2	2	1	8	19
OG0000943	1	1	1	2	2	3	4	2	3	19
OG0000944	2	3	2	1	2	2	2	3	2	19
OG0000945	4	0	3	2	2	1	2	2	3	19
OG0000946	2	2	2	2	3	2	2	1	3	19
OG0000947	3	3	2	2	2	2	2	2	1	19
OG0000948	2	1	1	0	2	4	2	4	3	19
OG0000949	3	2	2	3	2	2	2	2	1	19
OG0000950	3	1	3	3	3	4	0	1	1	19
OG0000951	1	2	3	2	2	1	3	1	4	19
OG0000952	3	1	2	3	1	1	2	3	3	19
OG0000953	2	3	2	2	3	2	2	2	1	19
OG0000954	3	2	3	1	1	1	3	3	2	19
OG0000955	2	1	3	3	2	1	1	3	3	19
OG0000956	2	2	2	2	3	2	2	2	2	19
OG0000957	2	1	2	4	2	2	2	2	2	19
OG0000958	2	2	2	2	4	2	1	2	2	19
OG0000959	2	2	4	4	2	1	0	1	3	19
OG0000960	3	0	5	3	1	1	1	1	4	19
OG0000961	1	2	2	4	2	2	2	3	1	19
OG0000962	3	2	2	2	2	2	2	2	2	19
OG0000963	3	1	2	3	3	2	1	3	1	19
OG0000964	1	1	3	3	5	1	3	2	0	19
OG0000965	3	3	2	3	2	2	2	2	0	19
OG0000966	3	2	3	1	2	2	2	2	2	19
OG0000967	2	3	2	2	2	2	2	2	2	19
OG0000968	2	2	2	2	2	2	2	2	3	19
OG0000969	2	3	3	2	2	2	2	1	2	19
OG0000970	2	2	2	2	2	2	2	2	3	19
OG0000971	2	3	1	0	2	1	2	2	6	19
OG0000972	2	2	2	2	2	3	2	2	2	19
OG0000973	4	1	4	1	2	2	1	1	3	19
OG0000974	2	2	2	2	1	2	2	2	4	19
OG0000975	2	1	2	6	1	1	0	2	4	19
OG0000976	3	1	3	1	3	2	3	2	1	19
OG0000977	3	2	1	2	2	2	2	2	3	19
OG0000978	2	3	2	1	2	2	5	1	1	19
OG0000979	2	2	2	2	2	2	2	2	3	19
OG0000980	2	2	2	1	2	1	2	4	3	19
OG0000981	2	2	3	3	1	2	2	2	2	19
OG0000982	2	1	2	2	2	3	2	3	2	19
OG0000983	2	3	2	1	2	2	2	2	3	19
OG0000984	2	2	2	4	2	1	1	2	3	19
OG0000985	1	4	3	1	1	4	2	2	1	19
OG0000986	2	2	2	4	2	2	2	1	2	19
OG0000987	3	2	3	3	1	3	1	2	1	19
OG0000988	3	1	2	1	2	2	2	2	4	19
OG0000989	2	0	2	3	1	1	7	1	2	19
OG0000990	4	0	3	3	1	2	3	1	2	19
OG0000991	2	0	2	3	2	3	2	1	4	19
OG0000992	2	2	2	2	2	2	2	2	3	19
OG0000993	2	1	2	2	2	3	2	2	3	19
OG0000994	3	1	3	1	3	2	2	3	1	19
OG0000995	3	1	2	2	3	1	3	2	2	19
OG0000996	2	1	4	1	1	3	3	2	2	19
OG0000997	2	4	2	2	0	1	3	2	3	19
OG0000998	2	3	4	2	2	1	2	2	1	19
OG0000999	4	1	1	3	2	1	1	2	4	19
OG0001000	2	1	2	2	2	1	3	2	4	19
OG0001001	1	2	1	3	1	1	5	4	1	19
OG0001002	3	1	3	3	0	1	2	1	5	19
OG0001003	2	3	2	2	2	2	3	2	1	19
OG0001004	2	3	2	2	2	2	2	2	2	19
OG0001005	3	3	2	0	2	2	2	2	3	19
OG0001006	3	1	2	3	1	2	2	1	4	19
OG0001007	3	2	3	3	1	3	1	2	1	19
OG0001008	2	2	4	3	2	1	1	2	2	19
OG0001009	0	5	3	0	2	1	2	2	4	19
OG0001010	0	0	0	5	0	5	3	4	2	19
OG0001011	6	0	2	1	3	2	1	1	2	18
OG0001012	4	1	3	2	1	1	3	3	0	18
OG0001013	4	2	2	1	2	2	2	1	2	18
OG0001014	9	0	4	2	3	0	0	0	0	18
OG0001015	2	1	3	3	2	3	1	2	1	18
OG0001016	3	0	2	3	1	1	2	2	4	18
OG0001017	4	1	3	1	3	1	1	1	3	18
OG0001018	2	2	2	2	1	2	1	4	2	18
OG0001019	5	1	3	1	0	2	1	4	1	18
OG0001020	2	0	4	1	3	3	2	3	0	18
OG0001021	4	2	1	1	2	1	1	1	5	18
OG0001022	2	3	2	0	1	1	3	0	6	18
OG0001023	3	1	1	1	1	2	3	5	1	18
OG0001024	2	0	3	3	2	2	4	1	1	18
OG0001025	1	1	4	0	2	2	1	1	6	18
OG0001026	3	2	1	1	1	1	1	2	6	18
OG0001027	3	2	1	2	3	2	1	2	2	18
OG0001028	3	2	0	2	4	1	1	1	4	18
OG0001029	2	2	2	1	2	3	1	2	3	18
OG0001030	3	1	1	1	5	1	2	1	3	18
OG0001031	4	1	2	0	1	3	3	2	2	18
OG0001032	3	2	1	2	2	2	2	2	2	18
OG0001033	3	8	1	0	1	2	0	0	3	18
OG0001034	4	1	2	1	2	2	2	2	2	18
OG0001035	3	1	3	1	3	0	2	2	3	18
OG0001036	4	3	1	1	3	1	2	1	2	18
OG0001037	7	0	0	0	3	0	1	2	5	18
OG0001038	7	1	1	1	1	0	1	3	3	18
OG0001039	4	1	2	1	2	3	2	2	1	18
OG0001040	2	1	3	2	3	2	2	1	2	18
OG0001041	4	0	2	1	3	2	2	2	2	18
OG0001042	5	2	2	0	2	1	3	1	2	18
OG0001043	3	1	2	1	2	3	2	3	1	18
OG0001044	5	1	3	2	3	1	2	1	0	18
OG0001045	3	1	3	1	1	1	1	4	3	18
OG0001046	2	2	2	3	2	1	2	1	3	18
OG0001047	2	2	1	4	1	1	3	2	2	18
OG0001048	2	2	2	2	2	2	2	2	2	18
OG0001049	5	1	2	1	2	1	2	1	3	18
OG0001050	2	2	3	2	2	2	2	2	1	18
OG0001051	2	2	2	2	2	2	2	2	2	18
OG0001052	1	2	2	3	2	2	2	2	2	18
OG0001053	2	2	2	3	2	1	2	2	2	18
OG0001054	3	4	0	5	3	1	1	1	0	18
OG0001055	2	2	2	2	2	2	2	2	2	18
OG0001056	3	1	2	2	2	1	2	2	3	18
OG0001057	1	2	1	3	1	1	1	3	5	18
OG0001058	3	3	1	2	1	2	2	2	2	18
OG0001059	2	2	2	2	2	2	2	2	2	18
OG0001060	2	2	1	2	2	2	1	6	0	18
OG0001061	3	1	2	1	2	3	3	1	2	18
OG0001062	3	2	3	3	1	1	1	2	2	18
OG0001063	2	1	1	0	5	4	2	3	0	18
OG0001064	3	2	3	0	3	1	2	1	3	18
OG0001065	3	1	2	3	3	2	2	1	1	18
OG0001066	2	1	3	2	5	2	2	1	0	18
OG0001067	1	1	2	2	2	2	2	2	4	18
OG0001068	3	2	1	0	3	3	3	1	2	18
OG0001069	4	1	1	3	1	2	2	0	4	18
OG0001070	2	2	2	2	2	2	3	2	1	18
OG0001071	2	2	2	4	2	1	1	2	2	18
OG0001072	2	1	2	2	5	2	1	1	2	18
OG0001073	2	2	2	2	2	2	2	2	2	18
OG0001074	2	2	2	1	2	2	2	2	3	18
OG0001075	3	1	2	3	2	2	2	2	1	18
OG0001076	3	2	2	1	1	2	2	2	3	18
OG0001077	2	2	2	2	2	2	2	2	2	18
OG0001078	2	0	1	3	2	2	2	3	3	18
OG0001079	5	2	3	0	2	3	0	3	0	18
OG0001080	1	2	2	3	2	2	2	1	3	18
OG0001081	2	1	1	5	3	1	4	0	1	18
OG0001082	1	1	3	0	2	3	2	2	4	18
OG0001083	2	3	3	0	2	1	2	2	3	18
OG0001084	2	2	2	2	2	2	2	2	2	18
OG0001085	3	0	2	4	1	2	1	2	3	18
OG0001086	4	1	1	0	3	3	3	2	1	18
OG0001087	2	2	2	2	2	2	2	2	2	18
OG0001088	2	2	2	1	2	2	2	2	3	18
OG0001089	2	1	2	1	2	4	2	2	2	18
OG0001090	2	2	3	1	2	2	2	2	2	18
OG0001091	5	0	3	1	1	3	2	0	3	18
OG0001092	3	3	3	1	1	2	2	1	2	18
OG0001093	1	2	0	0	1	1	1	2	10	18
OG0001094	2	2	2	2	2	2	2	2	2	18
OG0001095	2	2	2	1	2	1	2	2	4	18
OG0001096	3	1	1	0	2	2	2	2	5	18
OG0001097	2	1	2	2	2	2	2	2	3	18
OG0001098	1	2	2	0	2	2	2	1	6	18
OG0001099	2	1	4	0	2	3	2	3	1	18
OG0001100	3	1	5	1	1	0	4	2	1	18
OG0001101	1	1	3	0	2	4	2	3	2	18
OG0001102	2	0	3	0	2	2	3	2	4	18
OG0001103	1	2	3	2	1	3	3	1	2	18
OG0001104	2	1	2	2	2	2	2	2	3	18
OG0001105	3	1	2	1	3	2	3	2	1	18
OG0001106	2	1	2	2	2	2	2	2	3	18
OG0001107	2	1	2	3	2	3	2	2	1	18
OG0001108	4	2	1	2	1	2	2	2	2	18
OG0001109	1	3	1	3	2	2	1	3	2	18
OG0001110	2	2	3	2	2	2	2	2	1	18
OG0001111	2	2	2	2	2	2	2	2	2	18
OG0001112	2	2	2	2	2	2	2	2	2	18
OG0001113	3	1	2	1	2	3	2	2	2	18
OG0001114	2	2	2	3	2	2	1	2	2	18
OG0001115	1	2	3	3	2	1	2	2	2	18
OG0001116	1	2	1	0	4	1	1	1	7	18
OG0001117	2	2	1	2	2	3	2	2	2	18
OG0001118	1	1	2	3	1	2	2	1	5	18
OG0001119	2	3	2	2	4	1	1	1	2	18
OG0001120	1	4	1	3	2	1	1	1	4	18
OG0001121	3	1	1	3	3	1	3	1	2	18
OG0001122	3	2	0	2	3	1	2	2	3	18
OG0001123	4	1	4	1	3	0	2	2	1	18
OG0001124	2	2	2	2	2	2	2	2	2	18
OG0001125	2	2	2	2	2	2	2	2	2	18
OG0001126	2	2	2	2	2	2	2	2	2	18
OG0001127	2	1	1	0	4	1	2	2	5	18
OG0001128	2	2	2	2	2	2	2	2	2	18
OG0001129	1	3	1	2	1	3	2	2	3	18
OG0001130	2	2	2	2	3	3	1	2	1	18
OG0001131	2	1	1	3	3	2	2	2	2	18
OG0001132	2	2	2	2	1	0	3	3	3	18
OG0001133	2	1	1	4	1	4	1	2	2	18
OG0001134	2	2	2	2	2	2	2	2	2	18
OG0001135	2	2	2	2	2	2	2	2	2	18
OG0001136	2	2	2	2	2	2	2	2	2	18
OG0001137	3	2	2	2	1	2	2	3	1	18
OG0001138	2	1	3	1	1	2	4	1	3	18
OG0001139	2	1	2	1	3	2	2	3	2	18
OG0001140	4	1	1	2	2	2	1	1	4	18
OG0001141	2	1	2	3	3	2	2	2	1	18
OG0001142	1	2	2	2	2	2	2	2	3	18
OG0001143	2	2	2	2	2	2	2	2	2	18
OG0001144	5	0	0	2	4	4	0	2	1	18
OG0001145	1	1	1	6	2	1	1	1	4	18
OG0001146	2	2	2	1	2	2	2	3	2	18
OG0001147	2	2	2	2	2	2	2	2	2	18
OG0001148	2	1	3	0	3	2	1	2	4	18
OG0001149	2	2	2	2	2	2	2	2	2	18
OG0001150	2	1	2	2	3	2	3	2	1	18
OG0001151	2	2	2	2	2	2	2	2	2	18
OG0001152	2	1	3	3	1	2	1	4	1	18
OG0001153	1	2	2	1	3	2	1	2	4	18
OG0001154	2	2	2	2	2	2	2	1	3	18
OG0001155	2	3	1	3	2	4	1	2	0	18
OG0001156	2	2	2	2	2	2	2	1	3	18
OG0001157	2	2	2	2	2	2	2	2	2	18
OG0001158	2	2	2	2	2	2	2	2	2	18
OG0001159	0	1	6	2	3	1	1	3	1	18
OG0001160	0	3	3	2	3	0	1	6	0	18
OG0001161	0	1	2	0	6	5	2	0	2	18
OG0001162	0	3	1	1	3	1	3	4	2	18
OG0001163	0	1	0	2	4	9	0	1	1	18
OG0001164	1	1	4	0	2	3	1	1	4	17
OG0001165	3	2	2	2	2	1	2	1	2	17
OG0001166	2	1	2	2	1	2	2	2	3	17
OG0001167	5	4	3	0	2	0	1	2	0	17
OG0001168	2	3	1	2	2	3	1	2	1	17
OG0001169	4	6	3	0	0	3	0	0	1	17
OG0001170	2	3	3	0	3	4	0	0	2	17
OG0001171	3	2	2	2	1	1	2	2	2	17
OG0001172	2	2	2	2	2	1	2	2	2	17
OG0001173	2	1	1	4	2	1	3	1	2	17
OG0001174	4	3	2	1	2	1	2	2	0	17
OG0001175	4	1	2	0	2	2	2	1	3	17
OG0001176	4	1	4	0	0	1	3	2	2	17
OG0001177	3	3	1	1	1	1	1	2	4	17
OG0001178	5	0	3	1	1	2	3	2	0	17
OG0001179	5	2	1	3	1	3	1	0	1	17
OG0001180	2	2	1	2	0	4	3	2	1	17
OG0001181	3	0	2	3	2	2	2	2	1	17
OG0001182	4	1	2	1	2	2	1	1	3	17
OG0001183	4	0	3	3	0	0	5	2	0	17
OG0001184	3	1	2	2	1	2	2	1	3	17
OG0001185	3	0	4	0	3	2	2	2	1	17
OG0001186	2	3	2	0	3	1	0	3	3	17
OG0001187	2	1	5	0	1	2	4	0	2	17
OG0001188	2	3	3	0	4	2	1	2	0	17
OG0001189	3	5	0	1	0	1	1	2	4	17
OG0001190	4	2	1	0	4	1	1	1	3	17
OG0001191	4	1	2	1	2	2	2	2	1	17
OG0001192	1	1	1	0	1	1	3	1	8	17
OG0001193	2	1	3	3	1	2	2	1	2	17
OG0001194	2	0	1	3	3	2	3	3	0	17
OG0001195	2	1	1	3	3	2	2	3	0	17
OG0001196	5	0	3	1	1	2	1	1	3	17
OG0001197	5	1	1	0	3	0	2	1	4	17
OG0001198	2	2	1	2	1	2	1	1	5	17
OG0001199	3	1	2	2	2	2	3	2	0	17
OG0001200	1	2	2	2	2	3	2	2	1	17
OG0001201	2	2	2	2	2	2	2	2	1	17
OG0001202	1	2	5	2	2	1	1	1	2	17
OG0001203	2	2	2	2	2	1	2	2	2	17
OG0001204	3	2	3	1	2	1	2	1	2	17
OG0001205	1	2	3	0	2	2	2	2	3	17
OG0001206	2	2	2	3	2	2	2	2	0	17
OG0001207	2	1	2	2	3	2	2	2	1	17
OG0001208	2	2	2	1	2	2	2	2	2	17
OG0001209	2	1	3	1	1	3	2	1	3	17
OG0001210	3	3	1	3	2	0	3	0	2	17
OG0001211	2	2	2	2	2	2	3	1	1	17
OG0001212	1	1	2	1	4	2	1	3	2	17
OG0001213	3	2	2	2	2	2	2	1	1	17
OG0001214	1	2	2	2	2	2	2	2	2	17
OG0001215	1	2	2	1	1	2	3	3	2	17
OG0001216	2	1	2	2	2	3	2	2	1	17
OG0001217	3	0	2	3	3	1	2	1	2	17
OG0001218	2	1	2	2	2	2	2	2	2	17
OG0001219	1	2	2	4	2	2	2	1	1	17
OG0001220	2	1	2	1	3	3	1	1	3	17
OG0001221	1	1	2	2	1	2	2	2	4	17
OG0001222	1	3	1	4	0	0	2	1	5	17
OG0001223	2	1	1	1	2	2	2	1	5	17
OG0001224	1	3	2	2	1	1	2	0	5	17
OG0001225	3	1	3	2	3	1	2	1	1	17
OG0001226	2	2	2	2	2	2	2	2	1	17
OG0001227	2	2	2	2	2	2	3	2	0	17
OG0001228	3	1	1	2	3	3	1	2	1	17
OG0001229	4	2	1	1	4	1	1	2	1	17
OG0001230	2	1	2	3	2	1	2	1	3	17
OG0001231	1	2	2	1	3	2	2	2	2	17
OG0001232	2	2	2	2	1	1	2	2	3	17
OG0001233	2	2	1	2	2	2	2	2	2	17
OG0001234	2	2	2	2	2	2	2	2	1	17
OG0001235	2	2	2	2	2	2	2	2	1	17
OG0001236	2	0	2	2	4	2	2	2	1	17
OG0001237	2	3	3	2	1	2	2	2	0	17
OG0001238	2	0	5	1	1	0	2	4	2	17
OG0001239	3	1	2	2	2	2	2	2	1	17
OG0001240	1	2	1	2	2	1	1	4	3	17
OG0001241	2	2	2	0	2	3	2	2	2	17
OG0001242	1	3	2	1	2	1	2	2	3	17
OG0001243	2	1	2	3	2	1	2	2	2	17
OG0001244	2	2	2	3	3	1	1	1	2	17
OG0001245	2	1	2	2	2	2	2	3	1	17
OG0001246	3	2	2	1	2	1	2	2	2	17
OG0001247	3	2	0	2	2	2	2	2	2	17
OG0001248	2	3	1	3	1	1	1	2	3	17
OG0001249	3	1	2	2	1	3	1	2	2	17
OG0001250	2	2	2	1	2	2	2	2	2	17
OG0001251	2	4	1	3	2	1	2	1	1	17
OG0001252	2	2	2	2	2	1	2	2	2	17
OG0001253	2	2	2	1	2	2	2	2	2	17
OG0001254	2	1	2	2	2	3	1	2	2	17
OG0001255	2	1	3	1	2	3	1	3	1	17
OG0001256	1	1	2	1	2	2	2	4	2	17
OG0001257	1	1	3	2	1	3	1	3	2	17
OG0001258	2	2	2	3	1	1	2	1	3	17
OG0001259	2	0	2	3	6	1	1	1	1	17
OG0001260	3	1	2	2	2	2	3	1	1	17
OG0001261	2	1	2	3	1	1	3	3	1	17
OG0001262	2	2	2	2	1	2	1	2	3	17
OG0001263	3	1	2	3	2	1	2	2	1	17
OG0001264	3	2	2	2	2	2	2	2	0	17
OG0001265	3	2	3	0	2	2	2	3	0	17
OG0001266	3	1	4	1	1	2	3	1	1	17
OG0001267	3	0	2	1	2	3	1	3	2	17
OG0001268	2	1	2	2	2	2	2	2	2	17
OG0001269	1	1	1	2	2	2	2	2	4	17
OG0001270	3	0	3	2	2	1	2	2	2	17
OG0001271	2	1	4	2	1	3	2	1	1	17
OG0001272	2	2	1	2	2	1	2	1	4	17
OG0001273	4	1	3	1	1	1	1	4	1	17
OG0001274	3	1	2	3	2	2	1	1	2	17
OG0001275	2	1	2	4	1	3	0	3	1	17
OG0001276	2	4	3	0	2	1	2	1	2	17
OG0001277	2	2	2	2	2	2	2	2	1	17
OG0001278	2	2	1	2	2	1	2	3	2	17
OG0001279	2	2	2	2	2	2	2	2	1	17
OG0001280	2	3	2	1	3	2	2	0	2	17
OG0001281	2	2	2	2	2	2	2	2	1	17
OG0001282	2	4	1	0	2	2	2	2	2	17
OG0001283	1	2	2	2	2	2	2	2	2	17
OG0001284	1	2	2	3	2	2	3	0	2	17
OG0001285	2	2	2	2	2	2	2	2	1	17
OG0001286	1	0	5	1	4	3	3	0	0	17
OG0001287	2	1	3	1	4	2	2	2	0	17
OG0001288	2	2	2	2	3	1	2	1	2	17
OG0001289	2	2	1	1	2	2	3	2	2	17
OG0001290	2	2	2	1	2	2	3	2	1	17
OG0001291	3	0	3	1	2	2	2	3	1	17
OG0001292	2	2	2	2	1	2	2	2	2	17
OG0001293	2	2	3	1	2	1	1	3	2	17
OG0001294	1	3	3	4	1	2	1	1	1	17
OG0001295	2	3	2	2	2	2	2	2	0	17
OG0001296	2	1	2	1	2	2	2	2	3	17
OG0001297	2	1	2	2	2	2	2	2	2	17
OG0001298	2	2	2	2	2	1	2	2	2	17
OG0001299	3	1	1	1	2	2	2	2	3	17
OG0001300	3	2	2	2	1	1	2	0	4	17
OG0001301	2	1	4	1	1	3	1	3	1	17
OG0001302	2	3	2	2	3	2	1	1	1	17
OG0001303	2	2	2	2	2	1	2	1	3	17
OG0001304	2	0	3	3	2	2	2	1	2	17
OG0001305	3	1	3	2	2	2	1	2	1	17
OG0001306	2	1	2	3	2	2	2	1	2	17
OG0001307	2	1	2	2	2	3	2	2	1	17
OG0001308	1	1	2	2	4	1	2	1	3	17
OG0001309	2	2	0	2	2	1	3	2	3	17
OG0001310	3	1	1	3	3	2	2	2	0	17
OG0001311	2	2	2	2	1	2	2	2	2	17
OG0001312	2	2	3	1	2	2	2	1	2	17
OG0001313	2	2	3	1	2	2	2	1	2	17
OG0001314	1	2	2	2	1	3	2	2	2	17
OG0001315	2	1	2	2	2	0	4	3	1	17
OG0001316	2	1	2	3	2	2	1	2	2	17
OG0001317	1	1	2	4	2	3	2	1	1	17
OG0001318	2	1	2	2	3	2	2	2	1	17
OG0001319	1	1	2	2	2	2	2	2	3	17
OG0001320	2	2	2	2	2	2	2	2	1	17
OG0001321	2	1	1	2	2	1	2	2	4	17
OG0001322	2	1	2	4	2	2	1	2	1	17
OG0001323	2	2	1	5	1	2	1	1	2	17
OG0001324	1	4	2	2	2	1	2	1	2	17
OG0001325	3	1	2	1	3	2	2	2	1	17
OG0001326	3	1	2	0	3	2	1	2	3	17
OG0001327	2	1	4	3	2	1	2	1	1	17
OG0001328	2	1	2	2	2	2	2	2	2	17
OG0001329	1	3	3	0	2	2	1	2	3	17
OG0001330	3	3	2	2	2	2	1	1	1	17
OG0001331	1	2	2	3	1	2	2	2	2	17
OG0001332	0	2	2	3	2	2	2	2	2	17
OG0001333	0	2	4	1	3	2	2	2	1	17
OG0001334	0	2	2	2	2	3	2	2	2	17
OG0001335	0	1	8	0	3	1	0	0	4	17
OG0001336	0	0	8	1	3	3	1	0	1	17
OG0001337	4	3	1	2	2	1	2	1	0	16
OG0001338	5	1	2	2	2	0	0	0	4	16
OG0001339	5	0	1	3	2	0	0	2	3	16
OG0001340	6	0	1	1	1	1	2	1	3	16
OG0001341	2	2	2	2	2	1	1	2	2	16
OG0001342	4	2	1	3	1	1	1	2	1	16
OG0001343	2	2	2	1	2	2	2	2	1	16
OG0001344	3	2	1	1	2	2	2	2	1	16
OG0001345	5	1	1	1	2	1	2	2	1	16
OG0001346	4	0	2	3	3	1	0	1	2	16
OG0001347	3	0	1	3	0	2	2	3	2	16
OG0001348	3	1	2	0	1	2	1	4	2	16
OG0001349	2	3	0	0	0	5	4	1	1	16
OG0001350	2	1	1	3	1	1	2	2	3	16
OG0001351	4	5	0	0	1	0	1	3	2	16
OG0001352	1	3	2	3	6	0	0	0	1	16
OG0001353	6	0	1	4	1	3	0	1	0	16
OG0001354	2	2	3	2	1	1	2	1	2	16
OG0001355	4	1	1	2	1	0	2	2	3	16
OG0001356	4	1	1	2	2	2	2	1	1	16
OG0001357	3	0	1	1	0	0	2	4	5	16
OG0001358	2	1	2	1	2	2	2	3	1	16
OG0001359	3	1	2	2	2	2	2	2	0	16
OG0001360	4	1	1	1	2	1	1	1	4	16
OG0001361	6	1	1	0	2	1	2	1	2	16
OG0001362	5	1	2	2	1	1	1	1	2	16
OG0001363	1	1	1	3	3	2	2	2	1	16
OG0001364	3	0	2	0	0	3	4	4	0	16
OG0001365	1	5	0	1	3	0	4	1	1	16
OG0001366	3	0	1	1	3	3	2	1	2	16
OG0001367	5	0	2	1	2	2	1	2	1	16
OG0001368	4	2	1	0	0	0	0	4	5	16
OG0001369	3	1	2	1	2	2	2	2	1	16
OG0001370	4	2	4	0	4	0	0	0	2	16
OG0001371	3	2	2	1	0	0	0	7	1	16
OG0001372	3	2	1	1	3	2	1	2	1	16
OG0001373	1	0	3	1	1	2	2	2	4	16
OG0001374	2	1	1	1	2	3	1	3	2	16
OG0001375	3	1	3	2	1	2	1	2	1	16
OG0001376	1	2	1	1	2	1	1	1	6	16
OG0001377	2	2	2	2	1	2	2	1	2	16
OG0001378	3	1	2	2	2	1	2	1	2	16
OG0001379	3	0	5	0	3	0	2	1	2	16
OG0001380	2	2	2	1	2	2	2	2	1	16
OG0001381	3	1	1	1	1	2	2	2	3	16
OG0001382	3	1	2	1	1	3	1	2	2	16
OG0001383	1	2	1	2	1	2	1	2	4	16
OG0001384	2	1	2	2	1	2	2	1	3	16
OG0001385	2	1	1	3	2	2	2	2	1	16
OG0001386	2	1	2	2	2	2	2	2	1	16
OG0001387	2	2	4	2	1	1	1	1	2	16
OG0001388	2	2	1	2	2	2	2	2	1	16
OG0001389	2	1	2	1	2	1	2	1	4	16
OG0001390	2	1	2	2	1	2	2	2	2	16
OG0001391	2	1	2	2	2	2	2	2	1	16
OG0001392	1	1	1	0	3	1	3	1	5	16
OG0001393	2	2	2	1	2	2	2	2	1	16
OG0001394	2	1	2	2	2	2	2	2	1	16
OG0001395	2	3	2	1	2	1	2	1	2	16
OG0001396	3	1	2	2	2	1	2	2	1	16
OG0001397	3	2	2	2	1	1	2	1	2	16
OG0001398	1	0	1	1	0	1	0	12	0	16
OG0001399	2	2	2	1	2	2	2	1	2	16
OG0001400	1	2	3	2	1	1	2	1	3	16
OG0001401	2	1	2	2	1	2	2	2	2	16
OG0001402	1	1	2	2	2	2	2	2	2	16
OG0001403	2	1	1	1	1	3	2	2	3	16
OG0001404	1	1	1	2	1	2	1	2	5	16
OG0001405	2	2	2	2	3	1	2	1	1	16
OG0001406	2	1	1	2	2	2	3	2	1	16
OG0001407	2	2	2	1	1	2	1	2	3	16
OG0001408	2	1	2	2	3	1	2	1	2	16
OG0001409	3	1	2	0	1	3	3	1	2	16
OG0001410	2	1	1	4	1	4	1	1	1	16
OG0001411	2	2	2	1	2	2	2	1	2	16
OG0001412	2	1	2	2	2	2	2	1	2	16
OG0001413	2	2	2	2	2	1	1	0	4	16
OG0001414	2	1	2	2	1	2	2	2	2	16
OG0001415	2	1	2	1	2	1	2	1	4	16
OG0001416	1	2	2	2	2	1	2	1	3	16
OG0001417	2	1	2	0	1	3	1	2	4	16
OG0001418	2	1	2	2	1	3	1	2	2	16
OG0001419	2	2	2	2	2	1	2	1	2	16
OG0001420	2	2	2	1	2	2	2	2	1	16
OG0001421	3	0	2	1	3	1	2	1	3	16
OG0001422	2	1	2	4	2	1	1	1	2	16
OG0001423	3	1	2	2	0	0	3	0	5	16
OG0001424	1	3	1	1	2	1	2	1	4	16
OG0001425	2	1	2	1	6	1	0	1	2	16
OG0001426	2	1	1	1	3	3	2	3	0	16
OG0001427	2	1	3	2	2	2	2	1	1	16
OG0001428	1	1	3	1	2	3	2	1	2	16
OG0001429	2	1	3	2	2	3	0	2	1	16
OG0001430	3	1	2	1	2	2	2	2	1	16
OG0001431	5	1	5	0	2	2	1	0	0	16
OG0001432	4	2	4	1	0	1	0	2	2	16
OG0001433	2	2	2	2	2	2	2	2	0	16
OG0001434	2	4	0	1	1	2	1	1	4	16
OG0001435	2	3	1	2	1	1	3	0	3	16
OG0001436	3	1	1	1	1	2	2	3	2	16
OG0001437	1	1	2	2	2	1	3	2	2	16
OG0001438	1	1	2	3	2	1	2	2	2	16
OG0001439	1	2	1	0	2	1	2	2	5	16
OG0001440	4	1	1	2	3	3	2	0	0	16
OG0001441	3	4	1	2	3	2	0	1	0	16
OG0001442	2	1	2	4	1	1	3	1	1	16
OG0001443	2	0	2	0	3	3	2	2	2	16
OG0001444	2	2	2	1	2	2	1	1	3	16
OG0001445	1	1	2	3	1	2	2	2	2	16
OG0001446	2	1	2	1	2	1	3	2	2	16
OG0001447	3	1	3	2	2	1	3	0	1	16
OG0001448	1	5	2	0	1	0	2	0	5	16
OG0001449	2	2	2	2	2	1	1	2	2	16
OG0001450	2	1	2	1	3	1	3	1	2	16
OG0001451	3	2	2	2	2	1	1	1	2	16
OG0001452	2	4	1	2	0	2	2	2	1	16
OG0001453	3	1	2	1	1	2	3	1	2	16
OG0001454	3	2	4	0	2	1	3	0	1	16
OG0001455	2	0	2	3	2	2	2	2	1	16
OG0001456	2	2	0	1	2	2	1	3	3	16
OG0001457	1	1	2	1	1	2	2	2	4	16
OG0001458	1	4	2	1	1	2	2	1	2	16
OG0001459	2	3	3	0	0	2	2	1	3	16
OG0001460	2	1	2	1	2	2	2	1	3	16
OG0001461	4	1	1	2	1	1	2	1	3	16
OG0001462	1	1	2	2	0	3	1	4	2	16
OG0001463	3	2	2	2	2	0	1	2	2	16
OG0001464	3	2	2	1	2	1	1	3	1	16
OG0001465	1	2	4	1	1	2	2	2	1	16
OG0001466	2	1	3	1	2	2	1	2	2	16
OG0001467	2	1	1	1	1	1	2	2	5	16
OG0001468	4	1	2	2	0	2	1	2	2	16
OG0001469	2	1	2	2	1	1	1	2	4	16
OG0001470	2	3	2	2	2	1	1	2	1	16
OG0001471	2	1	2	2	2	1	2	1	3	16
OG0001472	2	2	1	2	2	1	2	2	2	16
OG0001473	2	1	2	2	2	2	3	1	1	16
OG0001474	2	1	2	2	2	2	3	1	1	16
OG0001475	2	2	2	2	2	2	1	2	1	16
OG0001476	2	0	2	3	2	2	1	1	3	16
OG0001477	2	2	2	2	2	1	2	1	2	16
OG0001478	3	1	3	2	1	2	1	2	1	16
OG0001479	1	1	1	1	2	2	1	4	3	16
OG0001480	1	1	4	1	3	1	1	1	3	16
OG0001481	2	2	2	1	2	2	1	1	3	16
OG0001482	1	1	1	3	1	1	1	1	6	16
OG0001483	1	2	1	2	2	1	2	2	3	16
OG0001484	3	1	2	0	2	3	2	2	1	16
OG0001485	3	1	2	2	1	2	2	2	1	16
OG0001486	1	1	1	4	2	1	1	1	4	16
OG0001487	3	2	2	2	1	2	1	2	1	16
OG0001488	2	1	2	2	2	2	2	2	1	16
OG0001489	2	2	2	3	1	1	0	3	2	16
OG0001490	2	1	1	2	2	2	2	2	2	16
OG0001491	3	0	3	1	3	1	1	2	2	16
OG0001492	3	1	2	0	3	1	3	1	2	16
OG0001493	2	1	4	1	2	2	1	1	2	16
OG0001494	1	1	2	1	1	3	1	4	2	16
OG0001495	2	2	2	0	2	2	2	2	2	16
OG0001496	1	2	1	2	2	2	1	2	3	16
OG0001497	2	0	3	1	2	2	2	1	3	16
OG0001498	2	2	3	1	3	0	3	1	1	16
OG0001499	3	1	2	0	2	3	1	3	1	16
OG0001500	3	3	1	1	1	1	2	1	3	16
OG0001501	2	1	5	0	2	1	2	1	2	16
OG0001502	1	0	0	2	4	1	1	2	5	16
OG0001503	2	1	2	2	2	1	2	2	2	16
OG0001504	2	3	1	3	1	2	1	1	2	16
OG0001505	2	2	2	2	1	2	2	2	1	16
OG0001506	2	2	2	2	2	2	1	2	1	16
OG0001507	2	3	2	2	1	1	2	2	1	16
OG0001508	1	4	1	2	1	2	2	1	2	16
OG0001509	1	5	2	0	1	1	2	3	1	16
OG0001510	3	1	1	1	3	2	1	1	3	16
OG0001511	2	2	1	2	2	2	1	1	3	16
OG0001512	1	1	2	2	2	2	2	2	2	16
OG0001513	2	1	0	2	3	2	1	2	3	16
OG0001514	2	1	2	0	2	2	2	3	2	16
OG0001515	1	2	2	2	1	2	2	2	2	16
OG0001516	2	2	2	2	2	1	1	1	3	16
OG0001517	3	1	3	1	1	2	2	2	1	16
OG0001518	4	0	4	0	2	1	0	3	2	16
OG0001519	4	2	1	1	2	2	1	2	1	16
OG0001520	2	0	3	2	2	2	1	3	1	16
OG0001521	0	1	0	2	2	0	1	2	8	16
OG0001522	0	1	1	0	1	3	1	1	8	16
OG0001523	0	1	0	1	0	4	6	3	1	16
OG0001524	0	2	2	1	2	2	2	2	3	16
OG0001525	0	1	2	1	4	3	2	1	2	16
OG0001526	0	0	2	2	1	5	1	0	5	16
OG0001527	5	1	1	2	1	1	2	1	1	15
OG0001528	2	1	1	2	3	1	2	1	2	15
OG0001529	3	1	1	2	3	2	1	1	1	15
OG0001530	3	0	2	1	2	2	1	0	4	15
OG0001531	3	1	1	0	2	3	1	3	1	15
OG0001532	5	0	2	1	2	2	1	1	1	15
OG0001533	8	0	2	1	1	1	2	0	0	15
OG0001534	3	2	1	2	1	2	1	1	2	15
OG0001535	2	1	1	3	2	1	1	1	3	15
OG0001536	7	0	3	0	0	0	0	0	5	15
OG0001537	3	1	2	0	2	3	2	1	1	15
OG0001538	5	0	2	0	3	0	3	1	1	15
OG0001539	3	3	1	2	1	0	1	0	4	15
OG0001540	2	0	0	2	1	6	1	1	2	15
OG0001541	3	0	1	1	0	2	3	1	4	15
OG0001542	4	2	1	1	1	1	3	1	1	15
OG0001543	2	1	1	3	2	1	1	2	2	15
OG0001544	4	1	1	0	2	2	1	1	3	15
OG0001545	5	1	1	2	1	0	1	1	3	15
OG0001546	1	2	2	2	2	2	2	1	1	15
OG0001547	4	1	2	0	2	1	2	1	2	15
OG0001548	3	1	1	3	1	1	0	2	3	15
OG0001549	2	0	1	3	1	2	2	2	2	15
OG0001550	4	1	1	0	2	3	1	1	2	15
OG0001551	2	0	3	2	2	0	1	2	3	15
OG0001552	2	1	3	2	2	1	2	1	1	15
OG0001553	4	0	0	8	0	1	0	2	0	15
OG0001554	3	2	2	1	2	2	1	1	1	15
OG0001555	4	0	1	1	2	2	2	2	1	15
OG0001556	5	1	3	1	3	1	0	0	1	15
OG0001557	1	1	3	3	1	2	2	1	1	15
OG0001558	3	1	2	0	3	1	3	0	2	15
OG0001559	2	3	1	1	1	1	2	1	3	15
OG0001560	3	1	2	1	3	1	1	1	2	15
OG0001561	3	5	1	2	2	0	0	1	1	15
OG0001562	6	1	3	0	2	0	1	1	1	15
OG0001563	3	1	1	2	2	1	2	2	1	15
OG0001564	2	1	1	1	1	1	1	1	6	15
OG0001565	3	1	2	1	2	1	2	1	2	15
OG0001566	2	2	2	1	1	2	1	2	2	15
OG0001567	4	1	2	2	1	1	1	2	1	15
OG0001568	3	3	3	2	1	1	0	1	1	15
OG0001569	4	1	2	1	2	1	2	1	1	15
OG0001570	4	1	1	1	2	2	2	2	0	15
OG0001571	3	0	1	3	2	0	2	0	4	15
OG0001572	3	1	3	1	2	1	2	1	1	15
OG0001573	3	1	2	2	1	0	2	2	2	15
OG0001574	3	2	1	2	2	1	1	1	2	15
OG0001575	5	3	1	2	1	0	2	1	0	15
OG0001576	4	3	2	1	1	0	1	2	1	15
OG0001577	2	1	2	2	1	2	1	1	3	15
OG0001578	6	1	4	0	0	1	1	0	2	15
OG0001579	4	3	2	0	2	2	0	2	0	15
OG0001580	4	0	2	2	2	2	1	1	1	15
OG0001581	2	2	2	2	2	1	2	2	0	15
OG0001582	2	2	2	1	2	2	2	2	0	15
OG0001583	3	1	1	4	2	0	2	2	0	15
OG0001584	1	0	2	2	1	3	2	2	2	15
OG0001585	1	3	1	1	2	1	1	2	3	15
OG0001586	2	0	3	2	1	3	1	1	2	15
OG0001587	2	2	1	2	1	2	1	3	1	15
OG0001588	2	1	2	2	1	1	2	3	1	15
OG0001589	2	1	1	1	2	1	2	2	3	15
OG0001590	1	2	1	5	2	1	1	1	1	15
OG0001591	3	0	0	0	1	4	3	2	2	15
OG0001592	2	2	2	2	2	1	0	1	3	15
OG0001593	1	1	1	2	2	1	3	3	1	15
OG0001594	1	2	1	2	2	2	1	1	3	15
OG0001595	2	2	1	1	2	1	2	2	2	15
OG0001596	2	1	2	2	1	1	2	2	2	15
OG0001597	1	3	2	1	1	1	2	1	3	15
OG0001598	3	1	1	4	1	1	1	1	2	15
OG0001599	1	1	2	1	1	2	2	2	3	15
OG0001600	1	1	2	2	2	1	1	1	4	15
OG0001601	2	2	2	2	2	1	1	1	2	15
OG0001602	2	1	2	2	3	1	1	2	1	15
OG0001603	2	2	1	2	2	2	1	1	2	15
OG0001604	2	2	2	2	1	1	1	2	2	15
OG0001605	2	2	1	2	1	2	1	1	3	15
OG0001606	2	2	2	0	2	1	2	2	2	15
OG0001607	3	0	1	2	2	1	3	1	2	15
OG0001608	1	2	2	2	2	1	2	2	1	15
OG0001609	2	1	2	2	1	1	2	2	2	15
OG0001610	2	1	2	2	1	3	2	1	1	15
OG0001611	5	0	2	0	3	1	0	2	2	15
OG0001612	2	1	2	0	2	2	2	2	2	15
OG0001613	3	1	2	2	2	2	1	2	0	15
OG0001614	3	1	1	4	2	1	0	2	1	15
OG0001615	2	1	1	2	1	2	2	2	2	15
OG0001616	3	1	2	2	2	1	1	1	2	15
OG0001617	2	1	2	2	1	1	2	1	3	15
OG0001618	2	1	2	2	2	2	1	1	2	15
OG0001619	1	2	4	1	1	2	1	2	1	15
OG0001620	1	1	2	2	2	1	1	1	4	15
OG0001621	2	2	1	0	2	4	1	1	2	15
OG0001622	2	1	1	2	3	1	1	2	2	15
OG0001623	1	1	2	2	1	3	1	0	4	15
OG0001624	2	3	0	2	1	3	1	0	3	15
OG0001625	2	1	2	3	1	2	1	1	2	15
OG0001626	2	0	3	1	0	4	4	0	1	15
OG0001627	3	0	2	2	1	1	2	3	1	15
OG0001628	1	1	3	0	2	2	3	1	2	15
OG0001629	3	0	1	1	2	1	2	0	5	15
OG0001630	2	1	2	0	2	2	2	1	3	15
OG0001631	1	3	2	3	0	1	2	2	1	15
OG0001632	1	3	2	2	1	3	2	1	0	15
OG0001633	1	2	2	2	2	2	1	1	2	15
OG0001634	2	1	0	2	2	3	1	2	2	15
OG0001635	3	1	1	2	2	1	2	2	1	15
OG0001636	1	2	1	2	3	0	2	3	1	15
OG0001637	2	1	3	1	2	1	2	1	2	15
OG0001638	2	2	1	1	1	2	2	1	3	15
OG0001639	1	1	2	4	2	2	1	1	1	15
OG0001640	1	1	2	4	2	1	2	2	0	15
OG0001641	2	2	2	2	1	3	0	1	2	15
OG0001642	3	1	2	2	2	1	1	1	2	15
OG0001643	2	1	1	6	2	1	0	0	2	15
OG0001644	3	1	2	1	2	2	1	2	1	15
OG0001645	2	1	1	4	1	1	1	1	3	15
OG0001646	2	1	2	1	2	1	2	2	2	15
OG0001647	2	2	2	1	3	1	2	1	1	15
OG0001648	3	1	1	2	2	2	1	1	2	15
OG0001649	1	2	2	2	2	1	2	2	1	15
OG0001650	3	2	1	2	1	1	1	2	2	15
OG0001651	1	4	1	0	3	5	0	0	1	15
OG0001652	2	3	2	1	2	2	1	1	1	15
OG0001653	3	1	2	1	1	2	2	2	1	15
OG0001654	2	1	2	1	1	1	2	2	3	15
OG0001655	2	2	1	2	1	1	1	1	4	15
OG0001656	2	0	2	1	2	2	2	2	2	15
OG0001657	1	1	1	3	2	1	2	2	2	15
OG0001658	1	1	1	2	3	1	2	3	1	15
OG0001659	2	1	2	0	2	2	2	2	2	15
OG0001660	2	2	2	2	2	1	2	1	1	15
OG0001661	2	1	2	2	2	2	2	1	1	15
OG0001662	2	2	2	1	1	2	1	3	1	15
OG0001663	1	1	4	0	1	1	5	1	1	15
OG0001664	2	1	4	2	1	2	0	1	2	15
OG0001665	3	1	2	1	2	2	1	1	2	15
OG0001666	3	1	0	4	1	1	2	2	1	15
OG0001667	1	0	4	0	5	2	0	0	3	15
OG0001668	1	2	2	1	2	2	1	2	2	15
OG0001669	3	1	1	2	1	3	1	1	2	15
OG0001670	2	2	1	2	3	2	1	1	1	15
OG0001671	1	2	2	2	2	0	2	2	2	15
OG0001672	1	2	2	2	1	1	2	2	2	15
OG0001673	1	3	0	1	5	0	0	3	2	15
OG0001674	1	1	3	1	2	2	2	1	2	15
OG0001675	1	1	1	2	1	1	1	1	6	15
OG0001676	2	1	2	1	2	1	1	4	1	15
OG0001677	1	0	4	2	1	1	2	1	3	15
OG0001678	2	1	2	2	2	1	1	1	3	15
OG0001679	2	1	2	1	2	1	3	2	1	15
OG0001680	2	1	1	2	2	1	1	1	4	15
OG0001681	1	2	2	1	2	2	2	2	1	15
OG0001682	1	1	1	2	1	1	2	2	4	15
OG0001683	1	1	2	2	2	1	1	1	4	15
OG0001684	2	1	1	2	2	0	1	2	4	15
OG0001685	1	2	1	1	2	1	1	1	5	15
OG0001686	2	0	1	3	4	2	0	1	2	15
OG0001687	3	1	1	1	1	2	2	3	1	15
OG0001688	3	0	4	0	2	1	3	1	1	15
OG0001689	2	1	1	3	3	2	1	1	1	15
OG0001690	4	1	1	1	3	1	1	2	1	15
OG0001691	2	2	1	0	2	1	2	3	2	15
OG0001692	4	2	1	0	2	2	1	1	2	15
OG0001693	2	3	2	1	2	1	1	1	2	15
OG0001694	3	0	2	2	1	2	0	1	4	15
OG0001695	2	2	2	3	1	3	0	2	0	15
OG0001696	3	0	3	3	2	0	1	2	1	15
OG0001697	2	2	1	2	1	2	1	3	1	15
OG0001698	2	2	1	2	1	2	2	2	1	15
OG0001699	1	1	1	2	1	1	1	3	4	15
OG0001700	2	1	2	0	2	2	2	2	2	15
OG0001701	2	2	2	2	2	1	1	2	1	15
OG0001702	1	1	1	2	1	2	2	3	2	15
OG0001703	2	1	2	2	2	1	1	1	3	15
OG0001704	1	1	1	1	2	1	1	1	6	15
OG0001705	2	3	1	1	3	1	1	2	1	15
OG0001706	6	1	1	1	1	1	1	2	1	15
OG0001707	3	0	3	1	2	2	2	2	0	15
OG0001708	2	2	1	1	2	2	1	2	2	15
OG0001709	3	1	1	2	1	1	3	1	2	15
OG0001710	5	1	2	0	1	2	1	2	1	15
OG0001711	1	2	2	2	2	2	2	2	0	15
OG0001712	1	2	2	2	2	2	1	2	1	15
OG0001713	3	1	1	2	2	1	2	2	1	15
OG0001714	1	2	3	2	1	1	2	3	0	15
OG0001715	2	0	2	0	5	3	1	1	1	15
OG0001716	1	1	2	1	1	2	1	1	5	15
OG0001717	2	0	3	1	2	1	3	1	2	15
OG0001718	1	1	2	0	1	1	1	4	4	15
OG0001719	2	1	3	2	2	1	2	1	1	15
OG0001720	3	0	2	1	2	2	2	2	1	15
OG0001721	3	1	1	2	3	1	1	0	3	15
OG0001722	3	0	3	2	1	2	1	1	2	15
OG0001723	1	2	2	3	1	2	1	1	2	15
OG0001724	2	4	2	1	2	1	1	1	1	15
OG0001725	2	0	1	3	2	2	3	2	0	15
OG0001726	2	2	2	3	1	1	2	2	0	15
OG0001727	2	2	1	2	2	2	2	2	0	15
OG0001728	2	2	2	1	2	2	2	2	0	15
OG0001729	2	2	2	2	2	1	1	2	1	15
OG0001730	2	2	2	2	2	1	1	1	2	15
OG0001731	1	2	1	2	1	2	2	2	2	15
OG0001732	2	2	2	1	2	1	2	2	1	15
OG0001733	2	1	2	1	2	2	2	2	1	15
OG0001734	2	1	1	1	2	2	2	2	2	15
OG0001735	2	1	1	1	2	2	2	1	3	15
OG0001736	2	1	2	2	2	1	2	1	2	15
OG0001737	4	2	2	2	2	1	1	1	0	15
OG0001738	2	1	0	5	2	1	1	1	2	15
OG0001739	2	0	1	2	2	4	0	3	1	15
OG0001740	2	2	2	2	1	0	2	2	2	15
OG0001741	2	2	2	1	2	2	2	2	0	15
OG0001742	2	2	2	0	2	2	2	1	2	15
OG0001743	3	1	2	1	1	2	2	1	2	15
OG0001744	2	1	2	1	2	2	1	2	2	15
OG0001745	2	1	1	1	2	1	2	2	3	15
OG0001746	2	1	2	3	1	1	2	2	1	15
OG0001747	2	1	2	0	2	1	2	2	3	15
OG0001748	2	1	2	2	2	2	2	1	1	15
OG0001749	2	1	1	3	2	2	2	1	1	15
OG0001750	2	1	1	2	2	2	1	2	2	15
OG0001751	1	1	1	1	1	2	1	3	4	15
OG0001752	2	2	1	2	3	1	1	1	2	15
OG0001753	1	2	1	2	2	1	2	1	3	15
OG0001754	2	1	1	2	1	1	2	3	2	15
OG0001755	2	2	0	2	2	1	2	1	3	15
OG0001756	2	1	2	2	2	1	2	2	1	15
OG0001757	2	1	2	0	1	2	2	2	3	15
OG0001758	2	2	2	2	2	1	1	1	2	15
OG0001759	1	1	1	2	2	3	1	3	1	15
OG0001760	0	4	2	2	0	2	1	2	2	15
OG0001761	0	1	1	3	4	1	2	0	3	15
OG0001762	0	1	6	1	2	1	3	0	1	15
OG0001763	0	1	4	3	1	1	3	2	0	15
OG0001764	0	1	1	2	2	2	2	2	3	15
OG0001765	0	1	0	2	0	6	4	1	1	15
OG0001766	0	1	3	4	4	1	0	2	0	15
OG0001767	0	0	0	1	0	0	13	1	0	15
OG0001768	0	0	0	0	0	0	0	0	15	15
OG0001769	2	0	3	0	4	1	0	2	2	14
OG0001770	2	2	2	2	1	1	2	1	1	14
OG0001771	4	2	1	1	2	2	1	1	0	14
OG0001772	3	0	2	2	2	0	1	2	2	14
OG0001773	3	1	1	1	2	2	1	1	2	14
OG0001774	3	1	1	1	1	1	1	1	4	14
OG0001775	6	0	0	2	0	2	2	2	0	14
OG0001776	1	2	3	0	1	4	0	0	3	14
OG0001777	3	2	1	1	2	2	1	1	1	14
OG0001778	5	2	1	1	3	2	0	0	0	14
OG0001779	3	2	1	1	1	1	2	1	2	14
OG0001780	5	0	1	1	1	4	0	0	2	14
OG0001781	3	1	3	1	0	2	2	1	1	14
OG0001782	2	0	0	0	0	4	5	1	2	14
OG0001783	2	1	1	3	1	1	1	3	1	14
OG0001784	2	1	2	2	1	2	1	1	2	14
OG0001785	4	1	2	3	0	1	1	2	0	14
OG0001786	5	1	1	3	2	1	0	0	1	14
OG0001787	2	1	2	1	1	1	3	1	2	14
OG0001788	4	1	2	2	1	0	0	1	3	14
OG0001789	2	0	1	1	2	4	2	1	1	14
OG0001790	4	0	0	3	0	1	6	0	0	14
OG0001791	2	1	1	1	1	1	2	1	4	14
OG0001792	4	0	1	2	0	1	2	1	3	14
OG0001793	6	0	2	2	0	0	4	0	0	14
OG0001794	5	0	0	0	2	0	3	3	1	14
OG0001795	2	0	1	2	2	1	1	2	3	14
OG0001796	2	1	1	2	1	2	2	2	1	14
OG0001797	4	1	1	1	1	1	1	1	3	14
OG0001798	2	2	1	0	1	2	1	2	3	14
OG0001799	3	2	1	1	1	1	1	1	3	14
OG0001800	3	1	1	2	1	3	1	1	1	14
OG0001801	3	1	2	3	1	1	1	1	1	14
OG0001802	2	1	2	2	2	1	0	1	3	14
OG0001803	4	2	1	2	1	1	1	1	1	14
OG0001804	3	1	1	0	2	2	3	2	0	14
OG0001805	1	1	2	2	3	1	0	2	2	14
OG0001806	2	3	0	1	1	1	2	1	3	14
OG0001807	2	2	2	1	2	3	1	0	1	14
OG0001808	2	1	2	1	2	1	2	2	1	14
OG0001809	5	0	2	0	1	0	3	3	0	14
OG0001810	1	1	0	2	2	2	3	2	1	14
OG0001811	2	1	2	2	2	1	1	1	2	14
OG0001812	2	1	2	2	2	1	1	1	2	14
OG0001813	1	0	1	2	1	3	3	3	0	14
OG0001814	2	1	3	2	1	1	1	2	1	14
OG0001815	1	1	1	1	1	1	4	1	3	14
OG0001816	1	1	1	1	1	1	1	1	6	14
OG0001817	2	1	2	1	1	1	1	1	4	14
OG0001818	2	1	1	1	1	1	1	1	5	14
OG0001819	2	1	1	2	2	2	2	1	1	14
OG0001820	1	0	2	2	2	1	1	1	4	14
OG0001821	2	1	2	1	2	2	2	1	1	14
OG0001822	1	1	2	2	2	2	2	1	1	14
OG0001823	2	0	2	1	2	2	2	2	1	14
OG0001824	2	2	1	1	2	0	1	3	2	14
OG0001825	5	0	1	1	1	1	2	1	2	14
OG0001826	2	2	2	2	1	2	1	1	1	14
OG0001827	1	1	2	0	1	3	3	2	1	14
OG0001828	1	1	1	2	2	1	1	2	3	14
OG0001829	1	1	2	2	1	1	2	2	2	14
OG0001830	2	0	0	2	2	3	2	0	3	14
OG0001831	2	2	2	0	1	2	3	1	1	14
OG0001832	1	0	3	0	1	2	1	1	5	14
OG0001833	2	2	2	1	1	2	2	1	1	14
OG0001834	2	2	2	1	2	1	1	2	1	14
OG0001835	3	0	2	3	1	0	2	1	2	14
OG0001836	3	0	2	3	1	2	1	1	1	14
OG0001837	1	1	2	3	1	2	1	1	2	14
OG0001838	1	2	1	2	1	1	1	3	2	14
OG0001839	2	1	2	2	1	1	2	2	1	14
OG0001840	2	0	2	1	1	2	2	1	3	14
OG0001841	1	1	2	2	1	1	2	2	2	14
OG0001842	2	1	1	3	2	1	1	1	2	14
OG0001843	1	2	1	1	0	2	2	2	3	14
OG0001844	2	1	1	2	3	2	2	1	0	14
OG0001845	3	1	2	1	2	2	2	0	1	14
OG0001846	2	2	1	1	1	2	2	1	2	14
OG0001847	4	1	1	3	2	1	1	0	1	14
OG0001848	1	0	1	1	1	3	3	3	1	14
OG0001849	2	0	2	1	2	1	2	2	2	14
OG0001850	1	0	2	3	1	3	1	2	1	14
OG0001851	2	1	2	1	2	2	1	2	1	14
OG0001852	1	2	3	2	2	0	2	1	1	14
OG0001853	4	2	2	0	1	2	0	1	2	14
OG0001854	2	0	2	1	2	2	1	1	3	14
OG0001855	4	0	1	1	1	4	1	0	2	14
OG0001856	1	3	2	1	1	1	2	2	1	14
OG0001857	5	1	2	1	0	1	1	1	2	14
OG0001858	1	0	3	2	3	1	2	2	0	14
OG0001859	2	1	1	2	2	2	1	2	1	14
OG0001860	2	1	1	2	2	1	2	1	2	14
OG0001861	2	0	1	1	4	2	1	2	1	14
OG0001862	2	1	1	3	1	1	1	1	3	14
OG0001863	2	5	0	3	1	1	2	0	0	14
OG0001864	2	1	1	2	1	1	2	1	3	14
OG0001865	1	4	2	2	0	2	3	0	0	14
OG0001866	1	6	1	1	0	2	1	0	2	14
OG0001867	3	2	1	0	1	2	2	1	2	14
OG0001868	1	4	1	2	1	1	0	3	1	14
OG0001869	3	1	2	1	1	0	1	1	4	14
OG0001870	2	1	1	1	2	2	2	1	2	14
OG0001871	1	3	1	2	1	2	1	1	2	14
OG0001872	2	1	2	2	2	1	1	1	2	14
OG0001873	2	1	1	2	2	1	2	2	1	14
OG0001874	3	1	1	1	2	2	1	2	1	14
OG0001875	2	1	2	1	2	1	2	1	2	14
OG0001876	2	2	2	1	2	1	2	1	1	14
OG0001877	2	2	1	1	2	1	2	2	1	14
OG0001878	2	2	2	0	2	3	1	1	1	14
OG0001879	1	1	1	2	2	2	1	2	2	14
OG0001880	2	2	0	1	1	2	2	1	3	14
OG0001881	2	3	2	1	1	2	1	1	1	14
OG0001882	2	0	2	2	1	1	3	1	2	14
OG0001883	3	0	2	3	1	1	1	1	2	14
OG0001884	2	1	2	0	2	1	2	2	2	14
OG0001885	1	3	1	0	1	3	1	2	2	14
OG0001886	2	2	1	2	1	2	1	1	2	14
OG0001887	2	1	2	2	2	1	1	1	2	14
OG0001888	1	0	2	3	2	2	1	1	2	14
OG0001889	1	1	2	4	2	1	1	1	1	14
OG0001890	2	2	1	1	2	1	2	2	1	14
OG0001891	2	1	2	1	2	1	1	1	3	14
OG0001892	2	2	0	1	3	2	2	1	1	14
OG0001893	2	0	2	0	2	2	2	2	2	14
OG0001894	2	2	4	0	2	2	1	0	1	14
OG0001895	4	2	1	0	1	1	2	1	2	14
OG0001896	2	0	2	1	0	2	3	2	2	14
OG0001897	1	1	1	1	2	1	3	2	2	14
OG0001898	2	2	1	2	1	2	1	1	2	14
OG0001899	2	2	2	2	2	1	2	1	0	14
OG0001900	2	2	2	2	2	1	1	1	1	14
OG0001901	2	1	2	2	2	1	1	1	2	14
OG0001902	2	1	2	2	2	1	1	1	2	14
OG0001903	1	1	2	2	2	1	0	2	3	14
OG0001904	1	1	2	1	2	1	1	1	4	14
OG0001905	2	1	2	1	1	2	2	2	1	14
OG0001906	3	1	2	2	1	1	1	2	1	14
OG0001907	1	1	2	2	1	2	1	2	2	14
OG0001908	2	1	1	2	1	1	1	1	4	14
OG0001909	2	1	2	1	2	1	2	2	1	14
OG0001910	2	6	3	1	0	0	1	1	0	14
OG0001911	2	0	1	3	1	2	3	2	0	14
OG0001912	1	2	1	1	2	2	1	1	3	14
OG0001913	1	1	2	2	1	1	2	2	2	14
OG0001914	2	0	3	2	2	0	1	1	3	14
OG0001915	2	1	3	2	2	1	1	1	1	14
OG0001916	1	1	1	2	1	2	2	2	2	14
OG0001917	2	1	2	2	2	2	1	1	1	14
OG0001918	2	1	2	3	1	2	1	1	1	14
OG0001919	2	4	0	0	0	4	0	4	0	14
OG0001920	1	1	1	2	2	2	1	2	2	14
OG0001921	3	0	1	2	1	1	1	5	0	14
OG0001922	2	1	2	2	2	1	2	2	0	14
OG0001923	1	1	3	3	3	2	1	0	0	14
OG0001924	2	1	2	2	1	1	1	2	2	14
OG0001925	2	0	1	1	2	2	2	1	3	14
OG0001926	2	1	2	2	2	1	1	1	2	14
OG0001927	2	1	1	2	2	1	1	2	2	14
OG0001928	2	1	1	2	1	1	2	2	2	14
OG0001929	2	0	3	1	2	2	2	1	1	14
OG0001930	1	1	2	2	1	1	2	2	2	14
OG0001931	2	1	1	2	2	1	2	1	2	14
OG0001932	2	2	2	1	1	1	1	1	3	14
OG0001933	2	1	2	2	1	2	0	1	3	14
OG0001934	3	1	3	1	1	1	1	2	1	14
OG0001935	2	2	2	0	2	2	2	2	0	14
OG0001936	1	2	2	2	1	1	1	1	3	14
OG0001937	3	2	2	1	1	2	1	1	1	14
OG0001938	3	1	1	2	3	1	1	1	1	14
OG0001939	2	2	2	2	2	1	1	1	1	14
OG0001940	2	1	2	0	2	2	2	2	1	14
OG0001941	2	1	0	3	2	3	1	1	1	14
OG0001942	2	1	2	2	2	2	2	1	0	14
OG0001943	2	1	1	2	3	2	2	1	0	14
OG0001944	1	1	1	1	1	2	1	2	4	14
OG0001945	2	0	2	2	1	1	2	2	2	14
OG0001946	3	0	3	1	4	1	1	1	0	14
OG0001947	2	1	2	0	2	2	2	2	1	14
OG0001948	2	1	2	1	1	2	2	2	1	14
OG0001949	1	2	1	1	0	3	2	3	1	14
OG0001950	1	4	1	2	1	1	1	2	1	14
OG0001951	2	0	3	3	1	3	0	2	0	14
OG0001952	2	1	1	1	2	1	2	2	2	14
OG0001953	1	2	2	2	2	1	1	1	2	14
OG0001954	1	1	2	3	1	1	2	2	1	14
OG0001955	2	1	2	2	2	1	1	1	2	14
OG0001956	1	2	2	2	2	1	1	1	2	14
OG0001957	1	3	1	1	2	1	1	1	3	14
OG0001958	3	1	1	1	2	2	1	1	2	14
OG0001959	3	0	2	0	3	3	2	0	1	14
OG0001960	2	0	2	1	1	2	2	2	2	14
OG0001961	1	1	2	2	1	1	1	3	2	14
OG0001962	1	1	1	5	1	1	1	1	2	14
OG0001963	4	1	2	2	2	0	0	0	3	14
OG0001964	2	2	1	2	2	1	1	1	2	14
OG0001965	1	2	2	3	1	1	1	0	3	14
OG0001966	1	5	0	1	1	1	1	1	3	14
OG0001967	3	0	4	1	2	1	2	0	1	14
OG0001968	1	1	1	0	9	0	0	0	2	14
OG0001969	3	0	0	4	1	2	1	3	0	14
OG0001970	3	2	2	1	2	0	1	2	1	14
OG0001971	1	1	2	0	2	2	2	2	2	14
OG0001972	2	1	1	2	1	1	1	2	3	14
OG0001973	5	0	9	0	0	0	0	0	0	14
OG0001974	1	2	1	2	2	1	1	2	2	14
OG0001975	2	0	2	2	1	2	2	1	2	14
OG0001976	2	1	1	3	2	1	1	1	2	14
OG0001977	2	1	1	3	2	1	1	1	2	14
OG0001978	1	0	3	0	2	2	3	2	1	14
OG0001979	2	2	1	1	2	1	2	2	1	14
OG0001980	1	1	1	2	2	1	1	3	2	14
OG0001981	2	2	2	2	2	1	1	1	1	14
OG0001982	1	4	2	1	1	1	2	1	1	14
OG0001983	3	2	1	2	3	1	1	1	0	14
OG0001984	4	1	2	2	2	1	1	1	0	14
OG0001985	2	3	1	2	2	1	1	1	1	14
OG0001986	4	2	1	1	2	1	2	1	0	14
OG0001987	1	1	1	2	1	1	1	4	2	14
OG0001988	1	1	2	2	2	2	2	2	0	14
OG0001989	1	3	1	1	2	2	1	1	2	14
OG0001990	2	0	3	1	1	1	1	3	2	14
OG0001991	1	2	1	2	2	2	2	1	1	14
OG0001992	2	1	2	2	2	1	1	1	2	14
OG0001993	1	1	1	2	1	2	2	2	2	14
OG0001994	2	1	2	2	2	1	2	1	1	14
OG0001995	1	1	2	1	2	2	2	2	1	14
OG0001996	1	0	2	3	3	1	2	1	1	14
OG0001997	2	0	2	1	0	3	4	2	0	14
[truncated: 17,953 more rows]

## Sheet: S5
Table S5: The core SCN genome. List of 3,373 Single-copy orthologs across 9 SCN accessions
Orthogroup	Gene ID 1	Gene ID 2	Gene ID 3	Gene ID 4	Gene ID 5	Gene ID 6	Gene ID 7	Gene ID 8	Gene ID 9
OG0005322	OG0011430Hg_Un_47_MM26_1988	OG0011430Hg_chrom3_OP50_14276	OG0011430Hg_chrom3_PA3_17951	OG0011430Hg_chrom3_TN10_15858	OG0011430Hg_chrom3_TN20_14974	OG0011430Hg_chrom3_TN22_17703	OG0011430Hg_chrom3_TN7_17776	OG0011430Hg_chrom3_TN8_17006	OG0011430chr3X12_12095
OG0005330	OG0004399Hg_Un_73_MM26_3011	OG0004399Hg_chrom1_OP50_4132	OG0004399Hg_chrom1_PA3_5190	OG0004399Hg_chrom1_TN20_4439	OG0004399Hg_chrom1_TN22_4979	OG0004399Hg_chrom1_TN7_4879	OG0004399Hg_chrom1_TN8_493	OG0004399Hg_chrom2_TN10_3385	OG0004399chr4X12_18710
OG0005346	OG0012730Hg_Un_304_MM26_1452	OG0012730Hg_chrom1_TN10_8259	OG0012730Hg_chrom2_OP50_6717	OG0012730Hg_chrom2_PA3_12250	OG0012730Hg_chrom2_TN20_6402	OG0012730Hg_chrom2_TN22_12453	OG0012730Hg_chrom2_TN7_12436	OG0012730Hg_chrom2_TN8_6037	OG0012730chr9X12_45845
OG0005348	OG0006498Hg_Un_318_MM26_1507	OG0006498Hg_chrom1_PA3_1215	OG0006498Hg_chrom1_TN20_1089	OG0006498Hg_chrom1_TN22_1223	OG0006498Hg_chrom1_TN8_1188	OG0006498Hg_chrom2_TN10_896	OG0006498Hg_chrom2_TN7_9228	OG0006498Hg_chrom3_OP50_11614	OG0006498chr4X12_22246
OG0005370	OG0016171Hg_chrom4_OP50_15595	OG0016171Hg_chrom4_TN10_26557	OG0016171Hg_chrom4_TN20_16700	OG0016171Hg_chrom4_TN22_19898	OG0016171Hg_chrom4_TN7_19976	OG0016171Hg_chrom4_TN8_19002	OG0016171chr1X12_2615	OG0024358Hg_Un_711_MM26_2873	OG0024358Hg_chrom4_PA3_20164
OG0005387	OG0005460Hg_chrom6_TN8_32981	OG0013710Hg_chrom6_PA3_33989	OG0013710Hg_chrom6_TN10_37563	OG0023980Hg_chrom6_OP50_27470	OG0023980Hg_chrom6_TN20_28342	OG0023980Hg_chrom6_TN22_33740	OG0023980Hg_chrom6_TN7_34055	OG0023980chr5X12_26426	OG0029157Hg_Un_814_MM26_3465
OG0005394	Hg_chrom4_TN22_20164	OG0005017Hg_Un_934_MM26_3996	OG0005017Hg_chrom4_OP50_15810	OG0005017Hg_chrom4_PA3_20513	OG0005017Hg_chrom4_TN10_25983	OG0005017Hg_chrom4_TN20_16928	OG0005017Hg_chrom4_TN7_20409	OG0005017Hg_chrom4_TN8_19308	OG0005017chr1X12_2897
OG0005396	OG0014347Hg_Un_1032_MM26_104	OG0014347Hg_chrom2_OP50_5205	OG0014347Hg_chrom2_PA3_10533	OG0014347Hg_chrom2_TN10_1115	OG0014347Hg_chrom2_TN20_10495	OG0014347Hg_chrom2_TN22_10575	OG0014347Hg_chrom2_TN7_10610	OG0014347Hg_chrom2_TN8_10457	OG0014347chr9X12_47595
OG0005405	OG0011497Hg_chrom1_MM26_4658	OG0011497Hg_chrom1_OP50_1144	OG0011497Hg_chrom1_PA3_1309	OG0011497Hg_chrom1_TN20_1179	OG0011497Hg_chrom1_TN22_1327	OG0011497Hg_chrom1_TN7_1178	OG0011497Hg_chrom1_TN8_129	OG0011497Hg_chrom2_TN10_793	OG0011497chr4X12_22396
OG0005406	OG0004440Hg_chrom1_OP50_1137	OG0004440Hg_chrom1_PA3_1302	OG0004440Hg_chrom1_TN20_1172	OG0004440Hg_chrom1_TN7_1171	OG0004440Hg_chrom1_TN8_1280	OG0004440Hg_chrom2_TN10_782	OG0004440chr4X12_22380	OG0008404Hg_chrom1_MM26_4663	OG0024262Hg_chrom1_TN22_1318
OG0005407	OG0014359Hg_chrom1_MM26_4669	OG0014359Hg_chrom1_OP50_1135	OG0014359Hg_chrom1_PA3_1298	OG0014359Hg_chrom1_TN20_1171	OG0014359Hg_chrom1_TN22_1313	OG0014359Hg_chrom1_TN7_1168	OG0014359Hg_chrom1_TN8_1277	OG0014359Hg_chrom2_TN10_781	OG0014359chr4X12_22374
OG0005409	OG0010397Hg_chrom1_TN7_115	OG0010397chr4X12_22365	OG0016409Hg_chrom1_MM26_4678	OG0016409Hg_chrom1_OP50_1131	OG0016409Hg_chrom1_PA3_1285	OG0016409Hg_chrom1_TN20_1164	OG0016409Hg_chrom1_TN22_1305	OG0016409Hg_chrom1_TN8_1267	OG0016409Hg_chrom2_TN10_776
OG0005411	OG0011499Hg_chrom1_MM26_4723	OG0011499Hg_chrom1_PA3_1248	OG0011499Hg_chrom1_TN20_1124	OG0016119Hg_chrom1_TN22_1264	OG0016119Hg_chrom1_TN7_1116	OG0016119Hg_chrom1_TN8_1227	OG0016119Hg_chrom2_TN10_852	OG0016119chr4X12_22307	OG0038761Hg_chrom1_OP50_1087
OG0005412	OG0005029Hg_chrom1_MM26_4725	OG0005029Hg_chrom1_OP50_1085	OG0005029Hg_chrom1_PA3_1247	OG0005029Hg_chrom1_TN20_1123	OG0005029Hg_chrom1_TN22_1263	OG0005029Hg_chrom1_TN7_1113	OG0005029Hg_chrom1_TN8_1225	OG0005029Hg_chrom2_TN10_854	OG0005029chr4X12_22306
OG0005413	OG0010398Hg_chrom1_MM26_4728	OG0010398Hg_chrom1_OP50_1084	OG0010398Hg_chrom1_PA3_1245	OG0010398Hg_chrom1_TN20_1120	OG0010398Hg_chrom1_TN22_1259	OG0010398Hg_chrom1_TN7_1111	OG0010398Hg_chrom1_TN8_1223	OG0010398Hg_chrom2_TN10_856	OG0010398chr4X12_22303
OG0005414	OG0009348Hg_chrom1_MM26_4730	OG0009348Hg_chrom1_OP50_1083	OG0009348Hg_chrom1_PA3_1244	OG0009348Hg_chrom1_TN20_1118	OG0009348Hg_chrom1_TN22_1258	OG0009348Hg_chrom1_TN7_111	OG0009348Hg_chrom1_TN8_1221	OG0009348Hg_chrom2_TN10_857	OG0009348chr4X12_22300
OG0005415	OG0005031Hg_chrom1_MM26_4749	OG0005031Hg_chrom1_OP50_1065	OG0005031Hg_chrom1_PA3_1224	OG0005031Hg_chrom1_TN20_1098	OG0005031Hg_chrom1_TN22_1233	OG0005031Hg_chrom1_TN7_1088	OG0005031Hg_chrom1_TN8_1198	OG0005031Hg_chrom2_TN10_886	OG0005031chr4X12_22260
OG0005416	Hg_chrom1_TN7_1086	OG0001758Hg_chrom1_TN22_1230	OG0001758Hg_chrom1_TN8_1194	OG0001758chr4X12_22256	OG0016412Hg_chrom1_PA3_1223	OG0016412Hg_chrom1_TN20_1097	OG0016412Hg_chrom2_TN10_888	OG0037204Hg_chrom1_MM26_4753	OG0037204Hg_chrom1_OP50_1063
OG0005417	OG0001569Hg_chrom1_MM26_4775	OG0001569Hg_chrom1_OP50_1043	OG0001569Hg_chrom1_PA3_1199	OG0001569Hg_chrom1_TN20_1075	OG0001569Hg_chrom1_TN22_1204	OG0001569Hg_chrom1_TN7_1070	OG0001569Hg_chrom1_TN8_1170	OG0001569Hg_chrom2_TN10_907	OG0001569chr4X12_22233
OG0005418	OG0006540Hg_chrom1_MM26_4792	OG0006540Hg_chrom1_OP50_1030	OG0006540Hg_chrom1_PA3_1173	OG0006540Hg_chrom1_TN20_1057	OG0006540Hg_chrom1_TN22_1184	OG0006540Hg_chrom1_TN7_1044	OG0006540Hg_chrom2_TN10_933	OG0006540chr4X12_22199	OG0026649Hg_chrom1_TN8_1156
OG0005419	OG0003904Hg_chrom1_MM26_4795	OG0003904Hg_chrom1_OP50_1028	OG0003904Hg_chrom1_PA3_1170	OG0003904Hg_chrom1_TN20_1055	OG0003904Hg_chrom1_TN22_1182	OG0003904Hg_chrom1_TN7_1042	OG0003904Hg_chrom1_TN8_1152	OG0003904Hg_chrom2_TN10_938	OG0003904chr4X12_22197
OG0005420	OG0006541Hg_chrom1_MM26_4799	OG0006541Hg_chrom1_OP50_1025	OG0006541Hg_chrom1_PA3_1166	OG0006541Hg_chrom1_TN20_1050	OG0006541Hg_chrom1_TN22_1179	OG0006541Hg_chrom1_TN7_104	OG0006541Hg_chrom1_TN8_1149	OG0006541Hg_chrom2_TN10_941	OG0006541chr4X12_22194
OG0005423	OG0001382Hg_chrom1_MM26_4943	OG0001382Hg_chrom1_OP50_1540	OG0001382Hg_chrom1_PA3_1971	OG0001382Hg_chrom1_TN20_1695	OG0001382Hg_chrom1_TN22_2065	OG0001382Hg_chrom1_TN7_1766	OG0001382Hg_chrom1_TN8_1911	OG0001382Hg_chrom2_TN10_6785	OG0001382chr4X12_22021
OG0005424	OG0003476Hg_chrom1_MM26_4951	OG0003476Hg_chrom1_OP50_1534	OG0003476Hg_chrom1_PA3_1966	OG0003476Hg_chrom1_TN20_1691	OG0003476Hg_chrom1_TN22_2060	OG0003476Hg_chrom1_TN7_1763	OG0003476Hg_chrom1_TN8_1908	OG0003476Hg_chrom2_TN10_6790	OG0003476chr4X12_22023
OG0005425	OG0011504Hg_chrom1_MM26_4963	OG0011504Hg_chrom1_OP50_1549	OG0011504Hg_chrom1_PA3_1981	OG0011504Hg_chrom1_TN22_2071	OG0011504Hg_chrom1_TN7_1773	OG0011504Hg_chrom1_TN8_1919	OG0011504Hg_chrom2_TN10_6779	OG0011504chr4X12_22013	OG0016416Hg_chrom1_TN20_1704
OG0005426	Hg_chrom2_TN10_6777	OG0014374Hg_chrom1_MM26_4964	OG0014374Hg_chrom1_OP50_1551	OG0014374Hg_chrom1_PA3_1982	OG0014374Hg_chrom1_TN20_1705	OG0014374Hg_chrom1_TN22_2073	OG0014374Hg_chrom1_TN7_1775	OG0014374Hg_chrom1_TN8_1920	OG0014374chr4X12_22012
OG0005427	OG0005035Hg_chrom1_MM26_4975	OG0005035Hg_chrom1_OP50_1557	OG0005035Hg_chrom1_TN20_1752	OG0005035Hg_chrom1_TN22_2095	OG0005035Hg_chrom1_TN7_1796	OG0005035Hg_chrom1_TN8_1934	OG0005035Hg_chrom2_TN10_671	OG0005035chr4X12_21957	OG0027963Hg_chrom1_PA3_2000
OG0005428	OG0014376Hg_chrom1_MM26_4980	OG0014376Hg_chrom1_PA3_2002	OG0014376Hg_chrom1_TN20_1754	OG0014376Hg_chrom1_TN7_1799	OG0014376Hg_chrom1_TN8_1938	OG0014376Hg_chrom2_TN10_6707	OG0014376chr4X12_21956	OG0019328Hg_chrom1_OP50_1562	OG0019328Hg_chrom1_TN22_2099
OG0005429	OG0014377Hg_chrom1_MM26_4982	OG0014377Hg_chrom1_OP50_1564	OG0014377Hg_chrom1_PA3_2003	OG0014377Hg_chrom1_TN20_1756	OG0014377Hg_chrom1_TN22_2100	OG0014377Hg_chrom1_TN7_1800	OG0014377Hg_chrom1_TN8_194	OG0014377Hg_chrom2_TN10_6706	OG0014377chr4X12_21952
OG0005430	OG0016417Hg_chrom1_MM26_4999	OG0016417Hg_chrom1_OP50_1576	OG0016417Hg_chrom1_PA3_2022	OG0016417Hg_chrom1_TN20_1769	OG0016417Hg_chrom1_TN22_2120	OG0016417Hg_chrom1_TN7_1820	OG0016417Hg_chrom1_TN8_1949	OG0016417Hg_chrom2_TN10_6687	OG0016417chr4X12_21938
OG0005431	OG0012801Hg_chrom1_MM26_5002	OG0012801Hg_chrom1_OP50_1582	OG0012801Hg_chrom1_TN20_1772	OG0012801Hg_chrom1_TN8_1952	OG0012801Hg_chrom2_TN10_6683	OG0012801chr4X12_21933	OG0034633Hg_chrom1_PA3_2027	OG0034633Hg_chrom1_TN22_2123	OG0034633Hg_chrom1_TN7_1823
OG0005432	OG0006544Hg_chrom1_MM26_5007	OG0006544Hg_chrom1_OP50_1584	OG0006544Hg_chrom1_PA3_2032	OG0006544Hg_chrom1_TN20_1773	OG0006544Hg_chrom1_TN8_1966	OG0006544Hg_chrom2_TN10_668	OG0036128Hg_chrom1_TN22_2126	OG0036128Hg_chrom1_TN7_1826	chr4X12_21927
OG0005433	OG0014382Hg_chrom1_MM26_5009	OG0014382Hg_chrom1_OP50_1587	OG0014382Hg_chrom1_PA3_2034	OG0014382Hg_chrom1_TN20_1775	OG0014382Hg_chrom1_TN22_2129	OG0014382Hg_chrom1_TN7_1828	OG0014382Hg_chrom1_TN8_1967	OG0014382Hg_chrom2_TN10_6677	OG0014382chr4X12_21925
OG0005434	OG0008410Hg_chrom1_MM26_5010	OG0008410Hg_chrom1_OP50_1589	OG0008410Hg_chrom1_PA3_2035	OG0008410Hg_chrom1_TN20_1777	OG0008410Hg_chrom1_TN22_213	OG0008410Hg_chrom1_TN7_183	OG0008410Hg_chrom1_TN8_1968	OG0008410chr4X12_21924	OG0016418Hg_chrom2_TN10_6638
OG0005435	Hg_chrom1_TN7_1850	OG0009355Hg_chrom1_MM26_5034	OG0009355Hg_chrom1_PA3_2053	OG0009355Hg_chrom1_TN20_1795	OG0009355Hg_chrom2_TN10_6616	OG0009355chr4X12_21906	OG0034027Hg_chrom1_OP50_1614	OG0034027Hg_chrom1_TN22_2148	OG0034027Hg_chrom1_TN8_1983
OG0005436	OG0003100Hg_chrom1_MM26_5193	OG0003100Hg_chrom1_OP50_1714	OG0003100Hg_chrom1_PA3_2182	OG0003100Hg_chrom1_TN20_1932	OG0003100Hg_chrom1_TN22_2264	OG0003100Hg_chrom1_TN7_2001	OG0003100Hg_chrom1_TN8_2112	OG0003100Hg_chrom2_TN10_649	OG0003100chr4X12_21790
OG0005437	OG0012809Hg_chrom1_MM26_5201	OG0012809Hg_chrom1_OP50_1721	OG0012809Hg_chrom1_PA3_2187	OG0012809Hg_chrom1_TN20_1939	OG0012809Hg_chrom2_TN10_6486	OG0012809chr4X12_21786	OG0036129Hg_chrom1_TN22_2270	OG0036129Hg_chrom1_TN7_2005	OG0036129Hg_chrom1_TN8_2119
OG0005438	OG0014389Hg_chrom1_MM26_5203	OG0014389Hg_chrom1_OP50_1723	OG0014389Hg_chrom1_PA3_2188	OG0014389Hg_chrom1_TN20_1941	OG0014389Hg_chrom1_TN7_2008	OG0014389Hg_chrom2_TN10_6484	OG0014389chr4X12_21784	OG0022118Hg_chrom1_TN22_2272	OG0022118Hg_chrom1_TN8_2120
OG0005439	OG0006548Hg_chrom1_MM26_5206	OG0006548Hg_chrom1_OP50_1724	OG0006548Hg_chrom1_PA3_2190	OG0006548Hg_chrom1_TN20_1944	OG0006548Hg_chrom1_TN22_2274	OG0006548Hg_chrom1_TN7_201	OG0006548Hg_chrom1_TN8_2122	OG0006548Hg_chrom2_TN10_6483	OG0006548chr4X12_21781
OG0005441	OG0005763Hg_chrom1_MM26_5216	OG0005763Hg_chrom1_OP50_1734	OG0005763Hg_chrom1_PA3_2201	OG0005763Hg_chrom1_TN20_1969	OG0005763Hg_chrom1_TN22_2286	OG0005763Hg_chrom1_TN7_2023	OG0005763Hg_chrom1_TN8_2147	OG0005763Hg_chrom2_TN10_6473	OG0016424chr4X12_21767
OG0005442	OG0002191Hg_chrom1_MM26_5223	OG0002191Hg_chrom1_OP50_1736	OG0002191Hg_chrom1_PA3_2207	OG0002191Hg_chrom1_TN20_1972	OG0002191Hg_chrom1_TN22_2291	OG0002191Hg_chrom1_TN7_2029	OG0002191Hg_chrom1_TN8_2150	OG0002191Hg_chrom2_TN10_6471	OG0002191chr4X12_21765
OG0005443	OG0007449Hg_chrom1_PA3_2209	OG0007449Hg_chrom1_TN22_2294	OG0007449Hg_chrom1_TN7_2031	OG0007449Hg_chrom1_TN8_2154	OG0007449Hg_chrom2_TN10_6469	OG0007449chr4X12_21755	OG0012811Hg_chrom1_MM26_5225	OG0012811Hg_chrom1_OP50_1737	OG0012811Hg_chrom1_TN20_1973
OG0005444	Hg_chrom1_TN20_1984	OG0003911Hg_chrom1_MM26_5239	OG0003911Hg_chrom1_OP50_1750	OG0003911Hg_chrom1_PA3_2227	OG0003911Hg_chrom1_TN22_2313	OG0003911Hg_chrom1_TN7_2048	OG0003911Hg_chrom1_TN8_2166	OG0003911Hg_chrom2_TN10_6455	OG0003911chr4X12_21741
OG0005445	Hg_chrom1_OP50_1754	OG0007450Hg_chrom1_TN20_1993	OG0007450Hg_chrom1_TN22_2320	OG0007450chr4X12_21734	OG0019333Hg_chrom1_MM26_5247	OG0019333Hg_chrom1_PA3_2235	OG0019333Hg_chrom1_TN7_2057	OG0019333Hg_chrom1_TN8_2172	OG0019333Hg_chrom2_TN10_6447
OG0005446	Hg_chrom2_TN10_6445	OG0009356Hg_chrom1_OP50_1762	OG0009356Hg_chrom1_TN20_1996	OG0009356Hg_chrom1_TN22_2325	OG0009356Hg_chrom1_TN7_2060	OG0009356Hg_chrom1_TN8_2176	OG0032617Hg_chrom1_MM26_5250	OG0032617Hg_chrom1_PA3_2238	OG0032617chr4X12_21731
OG0005447	OG0009357Hg_chrom1_MM26_5253	OG0009357Hg_chrom1_OP50_1765	OG0009357Hg_chrom1_PA3_2241	OG0009357Hg_chrom1_TN20_1998	OG0009357Hg_chrom1_TN7_2062	OG0009357Hg_chrom1_TN8_2179	OG0016425Hg_chrom2_TN10_6440	OG0016425chr4X12_21727	OG0042499Hg_chrom1_TN22_2329
OG0005448	OG0014391Hg_chrom1_MM26_5256	OG0014391Hg_chrom1_OP50_1767	OG0014391Hg_chrom1_PA3_2245	OG0014391Hg_chrom1_TN20_2000	OG0014391Hg_chrom1_TN22_2331	OG0014391Hg_chrom1_TN7_2066	OG0014391Hg_chrom1_TN8_2182	OG0014391Hg_chrom2_TN10_6439	OG0019335chr4X12_21721
OG0005449	OG0014393Hg_chrom1_MM26_5269	OG0014393Hg_chrom1_OP50_1778	OG0014393Hg_chrom1_PA3_2258	OG0014393Hg_chrom1_TN20_2009	OG0014393Hg_chrom1_TN22_2341	OG0014393Hg_chrom1_TN7_2078	OG0014393Hg_chrom1_TN8_2193	OG0014393Hg_chrom2_TN10_6427	OG0014393chr4X12_21710
OG0005450	OG0016426Hg_chrom1_MM26_5281	OG0016426Hg_chrom1_OP50_1790	OG0016426Hg_chrom1_PA3_2276	OG0016426Hg_chrom1_TN7_2090	OG0016426Hg_chrom1_TN8_2209	OG0016426Hg_chrom2_TN10_6414	OG0016426chr4X12_21695	OG0016427Hg_chrom1_TN20_2019	OG0016427Hg_chrom1_TN22_2351
OG0005451	OG0007451Hg_chrom1_MM26_5285	OG0007451Hg_chrom1_OP50_1793	OG0007451Hg_chrom1_PA3_2280	OG0007451Hg_chrom1_TN20_2022	OG0007451Hg_chrom1_TN7_2092	OG0007451Hg_chrom2_TN10_6411	OG0007452Hg_chrom1_TN22_2353	OG0007452Hg_chrom1_TN8_2212	chr4X12_21689
OG0005452	Hg_chrom2_TN10_641	OG0002771Hg_chrom1_MM26_5291	OG0002771Hg_chrom1_OP50_1797	OG0002771Hg_chrom1_PA3_2284	OG0002771Hg_chrom1_TN20_2026	OG0002771Hg_chrom1_TN22_236	OG0002771Hg_chrom1_TN7_2096	OG0002771Hg_chrom1_TN8_2215	OG0002771chr4X12_21686
OG0005453	OG0005764Hg_chrom1_MM26_5303	OG0005764Hg_chrom1_OP50_1803	OG0005764Hg_chrom1_PA3_2294	OG0005764Hg_chrom1_TN20_2032	OG0005764Hg_chrom1_TN22_2368	OG0005764Hg_chrom1_TN7_2106	OG0005764Hg_chrom1_TN8_2223	OG0005764Hg_chrom2_TN10_6405	OG0005764chr4X12_21679
OG0005454	OG0007454Hg_chrom1_MM26_5320	OG0007454Hg_chrom1_OP50_1819	OG0007454Hg_chrom1_PA3_2308	OG0007454Hg_chrom1_TN20_2050	OG0007454Hg_chrom1_TN22_2386	OG0007454Hg_chrom1_TN7_2124	OG0007454Hg_chrom1_TN8_2239	OG0007454Hg_chrom2_TN10_639	OG0007454chr4X12_21645
OG0005455	OG0014396Hg_chrom1_MM26_5324	OG0014396Hg_chrom1_OP50_1821	OG0014396Hg_chrom1_PA3_2311	OG0014396Hg_chrom1_TN20_2053	OG0014396Hg_chrom1_TN22_2388	OG0014396Hg_chrom1_TN7_2126	OG0014396Hg_chrom1_TN8_2242	OG0014396Hg_chrom2_TN10_6388	OG0014396chr4X12_21642
OG0005456	OG0006550Hg_chrom1_MM26_5327	OG0006550Hg_chrom1_OP50_1823	OG0006550Hg_chrom1_PA3_2314	OG0006550Hg_chrom1_TN20_2055	OG0006550Hg_chrom1_TN22_2390	OG0006550Hg_chrom1_TN7_213	OG0006550Hg_chrom1_TN8_2244	OG0006550Hg_chrom2_TN10_6386	OG0006550chr4X12_21639
OG0005457	Hg_chrom1_TN20_2062	OG0003912Hg_chrom1_MM26_5328	OG0003912Hg_chrom1_OP50_1828	OG0003912Hg_chrom1_PA3_2315	OG0003912Hg_chrom1_TN7_2130	OG0009359Hg_chrom1_TN22_2391	OG0009359Hg_chrom1_TN8_2247	OG0009359Hg_chrom2_TN10_6385	OG0009359chr4X12_21637
OG0005458	OG0016430Hg_chrom1_MM26_5332	OG0016430Hg_chrom1_OP50_1831	OG0016430Hg_chrom1_PA3_2319	OG0016430Hg_chrom1_TN20_2066	OG0016430Hg_chrom1_TN22_2397	OG0016430Hg_chrom1_TN7_2135	OG0016430Hg_chrom1_TN8_2250	OG0016430Hg_chrom2_TN10_6381	OG0016430chr4X12_21632
OG0005459	Hg_chrom1_PA3_2325	Hg_chrom1_TN7_2142	OG0002772Hg_chrom1_TN20_2074	OG0016431Hg_chrom1_MM26_5342	OG0016431Hg_chrom1_OP50_1834	OG0016431Hg_chrom1_TN22_2404	OG0016431Hg_chrom1_TN8_2258	OG0016431Hg_chrom2_TN10_6372	OG0016431chr4X12_21625
OG0005461	OG0004451Hg_chrom1_MM26_5392	OG0004451Hg_chrom1_OP50_1868	OG0004451Hg_chrom1_PA3_2381	OG0004451Hg_chrom1_TN20_2105	OG0004451Hg_chrom1_TN22_2441	OG0004451Hg_chrom1_TN7_2192	OG0004451Hg_chrom1_TN8_2313	OG0004451Hg_chrom2_TN10_6315	OG0004451chr4X12_21584
OG0005463	OG0008413Hg_chrom1_MM26_5399	OG0008413Hg_chrom1_OP50_1871	OG0008413Hg_chrom1_PA3_2384	OG0008413Hg_chrom1_TN20_2108	OG0008413Hg_chrom1_TN22_2446	OG0008413Hg_chrom1_TN7_2197	OG0008413Hg_chrom1_TN8_2319	OG0008413Hg_chrom2_TN10_6312	OG0008413chr4X12_21580
OG0005464	OG0005040Hg_chrom1_OP50_188	OG0005040Hg_chrom1_TN20_2117	OG0005040Hg_chrom1_TN22_2461	OG0005040Hg_chrom1_TN8_2337	OG0005040Hg_chrom2_TN10_63	OG0005040chr4X12_21567	OG0024405Hg_chrom1_MM26_5408	OG0024405Hg_chrom1_PA3_2393	OG0024405Hg_chrom1_TN7_2221
OG0005465	OG0010410Hg_chrom1_MM26_5410	OG0010410Hg_chrom1_OP50_1884	OG0010410Hg_chrom1_PA3_2394	OG0010410Hg_chrom1_TN20_2126	OG0010410Hg_chrom1_TN22_2463	OG0010410Hg_chrom1_TN7_2222	OG0010410Hg_chrom1_TN8_2339	OG0010410Hg_chrom2_TN10_6297	OG0010410chr4X12_21564
OG0005466	OG0010411Hg_chrom1_MM26_5421	OG0010411Hg_chrom1_OP50_1896	OG0010411Hg_chrom1_PA3_2403	OG0010411Hg_chrom1_TN20_2133	OG0010411Hg_chrom1_TN22_2473	OG0010411Hg_chrom1_TN7_2233	OG0010411Hg_chrom1_TN8_2350	OG0010411Hg_chrom2_TN10_6285	OG0010411chr4X12_21552
OG0005467	OG0001961Hg_chrom1_MM26_5431	OG0001961Hg_chrom1_OP50_1903	OG0001961Hg_chrom1_PA3_2413	OG0001961Hg_chrom1_TN20_2140	OG0001961Hg_chrom1_TN22_2482	OG0001961Hg_chrom2_TN10_6273	OG0001961chr4X12_21542	OG0014258Hg_chrom1_TN7_224	OG0014258Hg_chrom1_TN8_2358
OG0005468	OG0012815Hg_chrom1_OP50_1919	OG0012815Hg_chrom1_TN20_2492	OG0012815Hg_chrom1_TN22_2504	OG0012815Hg_chrom1_TN7_2260	OG0012815Hg_chrom1_TN8_2382	OG0012815Hg_chrom2_TN10_6250	OG0012815chr4X12_21514	OG0019341Hg_chrom1_MM26_5449	OG0019341Hg_chrom1_PA3_2433
OG0005469	OG0006551Hg_chrom1_MM26_5451	OG0006551Hg_chrom1_TN20_2489	OG0006551chr4X12_21512	OG0027965Hg_chrom1_OP50_1921	OG0027965Hg_chrom1_TN22_2508	OG0027965Hg_chrom1_TN7_2264	OG0027965Hg_chrom1_TN8_2387	OG0027965Hg_chrom2_TN10_6244	OG0029227Hg_chrom1_PA3_2435
OG0005470	OG0007457Hg_chrom1_MM26_5456	OG0007457Hg_chrom1_OP50_1924	OG0007457Hg_chrom1_PA3_2440	OG0007457Hg_chrom1_TN20_2484	OG0007457Hg_chrom1_TN22_2512	OG0007457Hg_chrom1_TN7_2268	OG0007457Hg_chrom1_TN8_2390	OG0007457Hg_chrom2_TN10_6241	OG0007457chr4X12_21506
OG0005471	OG0016435Hg_chrom1_MM26_5457	OG0016435Hg_chrom1_OP50_1926	OG0016435Hg_chrom1_PA3_2442	OG0016435Hg_chrom1_TN20_2483	OG0016435Hg_chrom1_TN22_2514	OG0016435Hg_chrom1_TN7_227	OG0016435Hg_chrom1_TN8_2392	OG0016435Hg_chrom2_TN10_6240	chr4X12_21505
OG0005472	OG0008415Hg_chrom1_MM26_5464	OG0008415Hg_chrom1_OP50_1930	OG0008415Hg_chrom1_PA3_2443	OG0008415Hg_chrom1_TN20_2478	OG0008415Hg_chrom1_TN22_2515	OG0008415Hg_chrom1_TN7_2276	OG0008415Hg_chrom1_TN8_2399	OG0008415Hg_chrom2_TN10_6237	OG0008415chr4X12_21499
OG0005473	OG0002193Hg_chrom1_MM26_5469	OG0002193Hg_chrom1_OP50_1935	OG0002193Hg_chrom1_PA3_2455	OG0002193Hg_chrom1_TN20_2470	OG0002193Hg_chrom1_TN22_2526	OG0002193Hg_chrom1_TN7_2280	OG0002193Hg_chrom1_TN8_2403	OG0002193Hg_chrom2_TN10_6230	OG0002193chr4X12_21495
OG0005474	OG0009361Hg_chrom1_MM26_5472	OG0009361Hg_chrom1_OP50_1939	OG0009361Hg_chrom1_PA3_2450	OG0009361Hg_chrom1_TN20_2467	OG0009361Hg_chrom1_TN22_2520	OG0009361Hg_chrom1_TN7_2283	OG0009361Hg_chrom1_TN8_2406	OG0009361Hg_chrom2_TN10_623	OG0009361chr4X12_21490
OG0005475	OG0000898Hg_chrom1_MM26_5476	OG0000898Hg_chrom1_OP50_1940	OG0000898Hg_chrom1_PA3_2459	OG0000898Hg_chrom1_TN20_2463	OG0000898Hg_chrom1_TN22_2531	OG0000898Hg_chrom1_TN7_2287	OG0000898Hg_chrom1_TN8_241	OG0000898Hg_chrom2_TN10_6226	OG0000898chr4X12_21487
OG0005476	OG0005767Hg_chrom1_MM26_5493	OG0005767Hg_chrom1_PA3_2491	OG0005767Hg_chrom1_TN22_2549	OG0005767Hg_chrom1_TN7_2304	OG0005767Hg_chrom1_TN8_2427	OG0005767Hg_chrom2_TN10_6201	OG0005767chr4X12_21470	OG0010414Hg_chrom1_OP50_1957	OG0010414Hg_chrom1_TN20_2447
OG0005477	OG0000558Hg_chrom1_OP50_196	OG0000558Hg_chrom1_PA3_2494	OG0000558Hg_chrom1_TN20_2445	OG0000558Hg_chrom1_TN22_2551	OG0000558Hg_chrom1_TN7_2306	OG0000558Hg_chrom1_TN8_2429	OG0000558Hg_chrom2_TN10_6193	OG0000558chr4X12_21465	OG0016438Hg_chrom1_MM26_5497
OG0005478	OG0009362Hg_chrom1_MM26_5506	OG0009362Hg_chrom1_OP50_1963	OG0009362Hg_chrom1_PA3_2497	OG0009362Hg_chrom1_TN20_2439	OG0009362Hg_chrom1_TN22_256	OG0009362Hg_chrom1_TN7_2313	OG0009362Hg_chrom1_TN8_2436	OG0009362Hg_chrom2_TN10_6190	OG0009362chr4X12_21462
OG0005479	OG0012818Hg_chrom1_MM26_5516	OG0012818Hg_chrom1_OP50_1972	OG0012818Hg_chrom1_PA3_2508	OG0012818Hg_chrom1_TN20_2435	OG0012818Hg_chrom1_TN22_2576	OG0012818Hg_chrom1_TN7_2323	OG0012818Hg_chrom1_TN8_2452	OG0012818Hg_chrom2_TN10_6187	OG0012818chr4X12_21458
OG0005480	OG0011512Hg_chrom1_MM26_5533	OG0011512Hg_chrom1_OP50_1988	OG0011512Hg_chrom1_PA3_2541	OG0011512Hg_chrom1_TN20_2378	OG0011512Hg_chrom1_TN22_2586	OG0011512Hg_chrom1_TN7_2342	OG0011512Hg_chrom1_TN8_2460	OG0011512Hg_chrom2_TN10_6153	OG0011512chr4X12_21427
OG0005481	OG0005043Hg_chrom1_MM26_5535	OG0005043Hg_chrom1_OP50_199	OG0005043Hg_chrom1_PA3_2544	OG0005043Hg_chrom1_TN20_2382	OG0005043Hg_chrom1_TN22_2588	OG0005043Hg_chrom2_TN10_6149	OG0028351Hg_chrom1_TN7_2345	OG0028351Hg_chrom1_TN8_2462	OG0028351chr4X12_21422
OG0005482	OG0014403Hg_chrom1_MM26_5541	OG0014403Hg_chrom1_OP50_1992	OG0014403Hg_chrom1_TN20_2384	OG0014403Hg_chrom1_TN7_2349	OG0014403Hg_chrom1_TN8_2466	OG0014403Hg_chrom2_TN10_6147	OG0014403chr4X12_21416	OG0031146Hg_chrom1_PA3_2548	OG0031146Hg_chrom1_TN22_2592
OG0005483	Hg_chrom1_MM26_5546	OG0001573Hg_chrom1_OP50_1997	OG0001573Hg_chrom1_PA3_2557	OG0001573Hg_chrom1_TN20_2390	OG0001573Hg_chrom1_TN22_2601	OG0001573Hg_chrom1_TN7_2355	OG0001573Hg_chrom2_TN10_6138	OG0001573chr4X12_21408	OG0024068Hg_chrom1_TN8_2471
OG0005486	OG0003484Hg_chrom1_MM26_5602	OG0003484Hg_chrom1_OP50_2043	OG0003484Hg_chrom1_PA3_2603	OG0003484Hg_chrom1_TN20_2350	OG0003484Hg_chrom1_TN22_2651	OG0003484Hg_chrom1_TN7_2403	OG0003484Hg_chrom1_TN8_2513	OG0003484Hg_chrom2_TN10_6092	OG0003484chr4X12_21340
OG0005487	OG0007460Hg_chrom1_MM26_5620	OG0007460Hg_chrom1_OP50_2054	OG0007460Hg_chrom1_PA3_2616	OG0007460Hg_chrom1_TN20_2367	OG0007460Hg_chrom1_TN22_2667	OG0007460Hg_chrom1_TN7_2419	OG0007460Hg_chrom1_TN8_2528	OG0007460Hg_chrom2_TN10_6078	OG0007460chr4X12_21319
OG0005488	Hg_chrom1_TN7_2426	OG0007461Hg_chrom1_MM26_5629	OG0007461Hg_chrom1_OP50_2059	OG0007461Hg_chrom1_PA3_2622	OG0007461Hg_chrom1_TN20_2316	OG0007461Hg_chrom1_TN22_2676	OG0007461Hg_chrom1_TN8_2538	OG0007461Hg_chrom2_TN10_6064	OG0007461chr4X12_21310
OG0005489	OG0011513Hg_chrom1_OP50_2062	OG0011513Hg_chrom1_TN20_2314	OG0011513Hg_chrom2_TN10_6061	OG0024409Hg_chrom1_MM26_5632	OG0024409Hg_chrom1_PA3_2625	OG0024409Hg_chrom1_TN22_2679	OG0024409Hg_chrom1_TN7_2429	OG0024409Hg_chrom1_TN8_2540	OG0024409chr4X12_21308
OG0005490	OG0012821Hg_chrom1_MM26_5640	OG0012821Hg_chrom1_PA3_2629	OG0012821Hg_chrom1_TN22_2682	OG0012821chr4X12_21303	OG0025715Hg_chrom1_OP50_2068	OG0025715Hg_chrom1_TN20_2311	OG0025715Hg_chrom1_TN7_2436	OG0025715Hg_chrom1_TN8_2548	OG0025715Hg_chrom2_TN10_6059
OG0005491	OG0007462Hg_chrom1_MM26_5645	OG0007462Hg_chrom1_OP50_207	OG0007462Hg_chrom1_PA3_2634	OG0007462Hg_chrom1_TN20_2306	OG0007462Hg_chrom1_TN22_2687	OG0007462Hg_chrom1_TN7_244	OG0007462Hg_chrom1_TN8_2550	OG0007462Hg_chrom2_TN10_6052	OG0007462chr4X12_21296
OG0005492	Hg_chrom1_PA3_2641	Hg_chrom1_TN7_2446	OG0009367Hg_chrom1_MM26_5649	OG0009367Hg_chrom1_OP50_2077	OG0009367Hg_chrom1_TN20_2300	OG0009367Hg_chrom1_TN22_2693	OG0009367Hg_chrom1_TN8_2558	OG0009367Hg_chrom2_TN10_6047	OG0009367chr4X12_21290
OG0005493	Hg_chrom1_OP50_208	Hg_chrom1_TN20_2298	Hg_chrom1_TN7_2449	OG0004452Hg_chrom1_MM26_5655	OG0004452Hg_chrom1_PA3_2644	OG0004452Hg_chrom1_TN22_2697	OG0004452Hg_chrom1_TN8_2563	OG0004452Hg_chrom2_TN10_604	OG0004452chr4X12_21286
OG0005494	OG0009368Hg_chrom1_MM26_5657	OG0009368Hg_chrom1_OP50_2082	OG0009368Hg_chrom1_PA3_2646	OG0009368Hg_chrom1_TN20_2295	OG0009368Hg_chrom1_TN22_2698	OG0009368Hg_chrom1_TN7_2453	OG0009368Hg_chrom1_TN8_2567	OG0009368Hg_chrom2_TN10_6038	OG0009368chr4X12_21281
OG0005495	OG0012822Hg_chrom1_MM26_5666	OG0012822Hg_chrom2_TN10_6031	OG0021628Hg_chrom1_OP50_2086	OG0021628Hg_chrom1_PA3_2650	OG0021628Hg_chrom1_TN20_2288	OG0021628Hg_chrom1_TN22_2703	OG0021628Hg_chrom1_TN7_2458	OG0021628Hg_chrom1_TN8_2576	OG0021628chr4X12_21273
OG0005496	OG0011515Hg_chrom1_MM26_5671	OG0011515Hg_chrom1_OP50_2092	OG0011515Hg_chrom1_PA3_2657	OG0011515Hg_chrom1_TN20_2281	OG0011515Hg_chrom1_TN22_2709	OG0011515Hg_chrom1_TN7_2463	OG0011515Hg_chrom1_TN8_2582	OG0011515Hg_chrom2_TN10_6026	OG0011515chr4X12_21266
OG0005497	OG0011516Hg_chrom1_MM26_5674	OG0011516Hg_chrom1_OP50_2098	OG0011516Hg_chrom1_PA3_2663	OG0011516Hg_chrom1_TN20_2277	OG0011516Hg_chrom1_TN22_2713	OG0011516Hg_chrom1_TN7_2469	OG0011516Hg_chrom1_TN8_2588	OG0011516Hg_chrom2_TN10_6024	OG0011516chr4X12_21263
OG0005498	OG0006554Hg_chrom1_MM26_5677	OG0006554Hg_chrom1_OP50_2101	OG0006554Hg_chrom1_PA3_2666	OG0006554Hg_chrom1_TN20_2275	OG0006554Hg_chrom1_TN22_2716	OG0006554Hg_chrom1_TN7_2471	OG0006554Hg_chrom1_TN8_2590	OG0006554Hg_chrom2_TN10_6023	OG0006554chr4X12_21261
OG0005499	OG0016450Hg_chrom1_MM26_5684	OG0016450Hg_chrom1_OP50_2108	OG0016450Hg_chrom1_PA3_2673	OG0016450Hg_chrom1_TN20_2271	OG0016450Hg_chrom1_TN22_2721	OG0016450Hg_chrom1_TN7_2476	OG0016450Hg_chrom1_TN8_2596	OG0016450Hg_chrom2_TN10_6017	OG0016450chr4X12_21255
OG0005500	OG0000115Hg_chrom1_MM26_5689	OG0000115Hg_chrom1_OP50_211	OG0000115Hg_chrom1_TN20_2268	OG0000115Hg_chrom1_TN22_2729	OG0000115Hg_chrom1_TN7_2483	OG0000115Hg_chrom1_TN8_2603	OG0000115Hg_chrom2_TN10_6006	OG0000115chr4X12_21244	OG0019361Hg_chrom1_PA3_2679
OG0005501	OG0014408Hg_chrom1_MM26_5699	OG0014408Hg_chrom1_OP50_2124	OG0014408Hg_chrom1_PA3_2691	OG0014408Hg_chrom1_TN20_2254	OG0014408Hg_chrom1_TN22_274	OG0014408Hg_chrom1_TN7_2493	OG0014408Hg_chrom1_TN8_2620	OG0014408Hg_chrom2_TN10_5988	OG0014408chr4X12_21231
OG0005502	OG0011518Hg_chrom1_MM26_5722	OG0011518Hg_chrom1_OP50_2150	OG0011518Hg_chrom1_PA3_2717	OG0011518Hg_chrom1_TN20_2229	OG0011518Hg_chrom1_TN22_2767	OG0011518Hg_chrom1_TN7_2516	OG0011518Hg_chrom2_TN10_5960	OG0011518chr4X12_21198	OG0019369Hg_chrom1_TN8_2645
OG0005503	OG0005774Hg_chrom1_MM26_5738	OG0005774Hg_chrom1_TN7_2531	OG0005774Hg_chrom1_TN8_2656	OG0005774Hg_chrom2_TN10_5947	OG0011519Hg_chrom1_OP50_216	OG0011519Hg_chrom1_PA3_2726	OG0011519Hg_chrom1_TN20_2223	OG0011519Hg_chrom1_TN22_2778	OG0011519chr4X12_21184
OG0005504	OG0004453Hg_chrom1_OP50_2164	OG0004453Hg_chrom1_PA3_2733	OG0004453Hg_chrom1_TN20_2221	OG0004453Hg_chrom1_TN8_266	OG0004453Hg_chrom2_TN10_594	OG0007463chr4X12_21180	OG0024412Hg_chrom1_MM26_5748	OG0024412Hg_chrom1_TN22_2784	OG0024412Hg_chrom1_TN7_254
OG0005505	Hg_chrom1_MM26_5764	OG0009370Hg_chrom1_OP50_2181	OG0009370Hg_chrom1_TN22_2798	OG0009370Hg_chrom1_TN7_2558	OG0009370Hg_chrom1_TN8_2677	OG0009370Hg_chrom2_TN10_5921	OG0009370chr4X12_21161	OG0039756Hg_chrom1_PA3_2755	OG0039756Hg_chrom1_TN20_2204
OG0005506	OG0001113Hg_chrom1_MM26_5770	OG0001113Hg_chrom1_OP50_2184	OG0001113Hg_chrom1_TN20_2201	OG0001113Hg_chrom1_TN22_2802	OG0001113Hg_chrom1_TN7_2562	OG0001113Hg_chrom1_TN8_2682	OG0001113Hg_chrom2_TN10_592	OG0001113chr4X12_21158	OG0032635Hg_chrom1_PA3_2760
OG0005507	OG0012826Hg_chrom1_TN20_2198	OG0012826Hg_chrom2_TN10_5916	OG0019370Hg_chrom1_MM26_5774	OG0019370Hg_chrom1_OP50_2187	OG0019370Hg_chrom1_PA3_2764	OG0019370Hg_chrom1_TN22_2806	OG0019370Hg_chrom1_TN7_2566	OG0019370Hg_chrom1_TN8_2687	OG0019370chr4X12_21157
OG0005508	OG0002775Hg_chrom1_MM26_5902	OG0002775Hg_chrom1_PA3_2855	OG0002775Hg_chrom1_TN20_2526	OG0002775Hg_chrom1_TN22_2896	OG0002775Hg_chrom1_TN8_2773	OG0002775Hg_chrom2_TN10_5789	OG0002775chr4X12_21117	OG0038782Hg_chrom1_OP50_2252	OG0038782Hg_chrom1_TN7_2654
OG0005509	OG0001964Hg_chrom1_MM26_5912	OG0001964Hg_chrom1_OP50_2259	OG0001964Hg_chrom1_PA3_2861	OG0001964Hg_chrom1_TN20_2531	OG0001964Hg_chrom1_TN22_2906	OG0001964Hg_chrom1_TN7_2662	OG0001964Hg_chrom1_TN8_2783	OG0001964Hg_chrom2_TN10_5779	OG0001964chr4X12_21107
OG0005510	OG0014137Hg_chrom1_PA3_2885	OG0014137Hg_chrom1_TN20_2553	OG0014137Hg_chrom1_TN22_2923	OG0014137Hg_chrom1_TN8_2807	OG0014137Hg_chrom2_TN10_5765	OG0016460Hg_chrom1_TN7_2685	OG0032643Hg_chrom1_MM26_5927	OG0032643Hg_chrom1_OP50_2275	OG0032643chr4X12_21091
OG0005511	OG0000899Hg_chrom1_MM26_5942	OG0000899Hg_chrom1_OP50_229	OG0000899Hg_chrom1_PA3_2895	OG0000899Hg_chrom1_TN20_2563	OG0000899Hg_chrom1_TN22_2938	OG0000899Hg_chrom1_TN7_2695	OG0000899Hg_chrom1_TN8_2820	OG0000899Hg_chrom2_TN10_5751	OG0000899chr4X12_21080
OG0005512	OG0012829Hg_chrom1_MM26_5947	OG0012829Hg_chrom1_OP50_2294	OG0012829Hg_chrom1_PA3_2897	OG0012829Hg_chrom1_TN20_2568	OG0012829Hg_chrom1_TN22_294	OG0012829Hg_chrom1_TN7_2701	OG0012829Hg_chrom1_TN8_2825	OG0012829Hg_chrom2_TN10_5746	OG0012829chr4X12_21076
OG0005513	Hg_chrom2_TN10_5744	OG0006558Hg_chrom1_MM26_5949	OG0006558Hg_chrom1_PA3_2902	OG0006558Hg_chrom1_TN20_2569	OG0006558Hg_chrom1_TN22_2945	OG0006558Hg_chrom1_TN7_2702	OG0006558chr4X12_21073	OG0030619Hg_chrom1_OP50_2296	OG0030619Hg_chrom1_TN8_2828
OG0005514	OG0007467Hg_chrom1_TN20_2571	OG0012830Hg_chrom1_MM26_5955	OG0012830Hg_chrom1_OP50_2301	OG0012830Hg_chrom1_PA3_2908	OG0012830Hg_chrom1_TN22_2951	OG0012830Hg_chrom1_TN7_2708	OG0012830Hg_chrom1_TN8_2833	OG0012830Hg_chrom2_TN10_5739	OG0012830chr4X12_21069
OG0005515	Hg_chrom1_PA3_2914	OG0001965Hg_chrom1_MM26_5960	OG0001965Hg_chrom1_OP50_2308	OG0001965Hg_chrom1_TN20_2580	OG0001965Hg_chrom1_TN22_2957	OG0001965Hg_chrom1_TN7_2712	OG0001965Hg_chrom1_TN8_2837	OG0001965Hg_chrom2_TN10_5732	OG0001965chr4X12_21061
OG0005516	OG0011523Hg_chrom1_MM26_5989	OG0011523Hg_chrom1_OP50_2335	OG0011523Hg_chrom1_TN20_2602	OG0011523Hg_chrom1_TN22_2984	OG0011523Hg_chrom2_TN10_5703	OG0011523chr4X12_21037	OG0014414Hg_chrom1_PA3_2979	OG0025716Hg_chrom1_TN7_274	OG0025716Hg_chrom1_TN8_2864
OG0005517	OG0009373Hg_chrom1_MM26_5992	OG0009373Hg_chrom1_PA3_2980	OG0009373Hg_chrom1_TN20_2603	OG0009373Hg_chrom2_TN10_5702	OG0009373chr4X12_21035	OG0011524Hg_chrom1_OP50_2338	OG0011524Hg_chrom1_TN22_2989	OG0011524Hg_chrom1_TN7_2746	OG0011524Hg_chrom1_TN8_287
OG0005518	Hg_chrom1_PA3_2987	OG0014415Hg_chrom1_MM26_5999	OG0014415Hg_chrom1_OP50_2345	OG0014415Hg_chrom1_TN20_2613	OG0014415Hg_chrom1_TN22_2994	OG0014415Hg_chrom1_TN7_2754	OG0014415Hg_chrom1_TN8_2874	OG0014415Hg_chrom2_TN10_5694	OG0014415chr4X12_21025
OG0005519	OG0011525Hg_chrom1_MM26_6001	OG0011525Hg_chrom1_OP50_2348	OG0011525Hg_chrom1_PA3_2990	OG0011525Hg_chrom1_TN20_2614	OG0011525Hg_chrom1_TN22_2996	OG0011525Hg_chrom1_TN7_2756	OG0011525Hg_chrom1_TN8_2876	OG0011525Hg_chrom2_TN10_5691	OG0011525chr4X12_21021
OG0005520	OG0000900Hg_chrom1_MM26_6029	OG0000900Hg_chrom1_OP50_2362	OG0000900Hg_chrom1_PA3_3012	OG0000900Hg_chrom1_TN20_2633	OG0000900Hg_chrom1_TN22_3012	OG0000900Hg_chrom1_TN7_2780	OG0000900Hg_chrom1_TN8_2905	OG0000900Hg_chrom2_TN10_5666	OG0000900chr4X12_20991
OG0005521	OG0003917Hg_chrom1_OP50_2369	OG0003917Hg_chrom1_TN20_2640	OG0003917Hg_chrom1_TN22_302	OG0003917Hg_chrom1_TN7_2785	OG0003917Hg_chrom1_TN8_291	OG0003917Hg_chrom2_TN10_5654	OG0003917chr4X12_20988	OG0014416Hg_chrom1_MM26_6031	OG0014416Hg_chrom1_PA3_3018
OG0005522	OG0008424Hg_chrom1_MM26_6039	OG0008424Hg_chrom1_PA3_3025	OG0008424Hg_chrom1_TN20_2647	OG0008424Hg_chrom1_TN22_3024	OG0008424Hg_chrom2_TN10_5649	OG0027969Hg_chrom1_OP50_2372	OG0027969Hg_chrom1_TN7_2795	OG0027969Hg_chrom1_TN8_2917	OG0027969chr4X12_20978
OG0005523	OG0014417Hg_chrom1_MM26_6043	OG0014417Hg_chrom1_OP50_2377	OG0014417Hg_chrom1_PA3_3030	OG0014417Hg_chrom1_TN20_2651	OG0014417Hg_chrom1_TN7_2801	OG0014417Hg_chrom2_TN10_5644	OG0014417chr4X12_20973	OG0036134Hg_chrom1_TN22_3030	OG0036134Hg_chrom1_TN8_2924
OG0005525	OG0008427Hg_chrom1_MM26_6072	OG0008427Hg_chrom1_OP50_2399	OG0008427Hg_chrom1_PA3_3044	OG0008427Hg_chrom1_TN20_2683	OG0008427Hg_chrom1_TN22_3063	OG0008427Hg_chrom1_TN7_2826	OG0008427Hg_chrom1_TN8_2952	OG0008427Hg_chrom2_TN10_5608	OG0008427chr4X12_20931
OG0005526	Hg_chrom1_MM26_6074	Hg_chrom2_TN10_5602	OG0004457Hg_chrom1_OP50_2402	OG0004457Hg_chrom1_PA3_3047	OG0004457Hg_chrom1_TN20_2686	OG0004457Hg_chrom1_TN22_3066	OG0004457Hg_chrom1_TN7_2829	OG0004457Hg_chrom1_TN8_2956	OG0004457chr4X12_20926
OG0005527	OG0003491Hg_chrom1_MM26_6087	OG0003491Hg_chrom1_OP50_2414	OG0003491Hg_chrom1_PA3_3060	OG0003491Hg_chrom1_TN20_2701	OG0003491Hg_chrom1_TN22_3085	OG0003491Hg_chrom1_TN7_2844	OG0003491Hg_chrom1_TN8_2968	OG0003491Hg_chrom2_TN10_5594	OG0003491chr4X12_20914
OG0005528	OG0001000Hg_chrom1_MM26_6098	OG0001000Hg_chrom1_OP50_2424	OG0001000Hg_chrom1_PA3_3065	OG0001000Hg_chrom1_TN20_2712	OG0001000Hg_chrom1_TN22_3075	OG0001000Hg_chrom1_TN8_2980	OG0001000Hg_chrom2_TN10_5579	OG0001000chr4X12_20905	OG0043295Hg_chrom1_TN7_2857
OG0005530	Hg_chrom1_TN22_3165	OG0012836Hg_chrom1_PA3_3163	OG0012836Hg_chrom2_TN10_5444	OG0029242Hg_chrom1_MM26_6203	OG0029242Hg_chrom1_TN7_2961	OG0029242Hg_chrom1_TN8_3078	OG0029242chr4X12_20796	OG0038787Hg_chrom1_OP50_2497	OG0038787Hg_chrom1_TN20_2797
OG0005531	OG0002473Hg_chrom1_MM26_6206	OG0002473Hg_chrom1_OP50_250	OG0002473Hg_chrom1_PA3_3167	OG0002473Hg_chrom1_TN20_2799	OG0002473Hg_chrom1_TN22_317	OG0002473Hg_chrom1_TN7_2965	OG0002473Hg_chrom1_TN8_3081	OG0002473Hg_chrom2_TN10_544	OG0002473chr4X12_20792
OG0005532	OG0002196Hg_chrom1_MM26_6210	OG0002196Hg_chrom1_OP50_2502	OG0002196Hg_chrom1_PA3_3170	OG0002196Hg_chrom1_TN20_2802	OG0002196Hg_chrom1_TN22_3175	OG0002196Hg_chrom1_TN7_2968	OG0002196Hg_chrom1_TN8_3085	OG0002196Hg_chrom2_TN10_5428	OG0002196chr4X12_20788
OG0005533	OG0006561Hg_chrom1_TN8_3089	OG0016477Hg_chrom1_OP50_2507	OG0016477Hg_chrom1_TN20_2803	OG0022147Hg_chrom1_MM26_6215	OG0022147Hg_chrom1_PA3_3176	OG0022147Hg_chrom1_TN22_3179	OG0022147Hg_chrom1_TN7_2973	OG0022147Hg_chrom2_TN10_5421	OG0022147chr4X12_20781
OG0005534	OG0001578Hg_chrom1_MM26_6220	OG0001578Hg_chrom1_OP50_2509	OG0001578Hg_chrom1_PA3_3178	OG0001578Hg_chrom1_TN22_318	OG0001578Hg_chrom1_TN7_2976	OG0001578Hg_chrom1_TN8_3093	OG0001578Hg_chrom2_TN10_5420	OG0001578chr4X12_20776	OG0019389Hg_chrom1_TN20_2806
OG0005535	OG0003923Hg_chrom1_MM26_6256	OG0003923Hg_chrom1_TN20_2850	OG0003923Hg_chrom1_TN22_321	OG0003923Hg_chrom1_TN7_3012	OG0003923Hg_chrom1_TN8_3134	OG0003923Hg_chrom2_TN10_5383	OG0021633Hg_chrom1_OP50_2541	OG0021633Hg_chrom1_PA3_3218	OG0021633chr4X12_20724
OG0005536	OG0014424Hg_chrom1_MM26_6268	OG0014424Hg_chrom1_TN22_3223	OG0014424Hg_chrom1_TN8_3139	OG0014424Hg_chrom2_TN10_5380	OG0014424chr4X12_20719	OG0026692Hg_chrom1_PA3_3227	OG0032115Hg_chrom1_TN7_3021	OG0034043Hg_chrom1_OP50_2549	OG0034043Hg_chrom1_TN20_2856
OG0005537	OG0000574Hg_chrom1_MM26_6278	OG0000574Hg_chrom1_OP50_2552	OG0000574Hg_chrom1_PA3_3231	OG0000574Hg_chrom1_TN20_2864	OG0000574Hg_chrom1_TN22_3232	OG0000574Hg_chrom1_TN7_3029	OG0000574Hg_chrom1_TN8_3145	OG0000574Hg_chrom2_TN10_5372	OG0000574chr4X12_20713
OG0005538	OG0016481Hg_chrom1_MM26_6281	OG0016481Hg_chrom1_OP50_2556	OG0016481Hg_chrom1_PA3_3235	OG0016481Hg_chrom1_TN20_2866	OG0016481Hg_chrom1_TN22_3234	OG0016481Hg_chrom1_TN7_3030	OG0016481Hg_chrom1_TN8_3148	OG0016481Hg_chrom2_TN10_5370	OG0016481chr4X12_20711
OG0005539	OG0005054Hg_chrom1_MM26_6294	OG0005054Hg_chrom1_OP50_2570	OG0005054Hg_chrom1_PA3_3248	OG0005054Hg_chrom1_TN20_2879	OG0005054Hg_chrom1_TN22_3249	OG0005054Hg_chrom1_TN7_3042	OG0005054Hg_chrom1_TN8_3161	OG0005054Hg_chrom2_TN10_5356	OG0005054chr4X12_20696
OG0005540	OG0007473Hg_chrom1_MM26_6333	OG0007473Hg_chrom1_OP50_2588	OG0007473Hg_chrom1_PA3_3268	OG0007473Hg_chrom1_TN20_2899	OG0007473Hg_chrom1_TN22_3268	OG0007473Hg_chrom1_TN7_3064	OG0007473Hg_chrom1_TN8_3180	OG0007473Hg_chrom2_TN10_534	OG0043300chr4X12_20674
OG0005541	OG0005784Hg_chrom1_MM26_6336	OG0005784Hg_chrom1_OP50_2590	OG0005784Hg_chrom1_TN20_2902	OG0005784Hg_chrom1_TN7_307	OG0005784Hg_chrom1_TN8_3184	OG0023777Hg_chrom1_TN22_3272	OG0024418Hg_chrom1_PA3_3272	OG0024418Hg_chrom2_TN10_5335	OG0024418chr4X12_20672
OG0005542	OG0005785Hg_chrom1_TN20_2908	OG0019394Hg_chrom1_MM26_6348	OG0019394Hg_chrom1_OP50_2598	OG0019394Hg_chrom1_PA3_3283	OG0019394Hg_chrom1_TN22_3281	OG0019394Hg_chrom1_TN7_3080	OG0019394Hg_chrom1_TN8_3196	OG0019394Hg_chrom2_TN10_5324	OG0019394chr4X12_20662
OG0005544	OG0001385Hg_chrom1_MM26_6364	OG0001385Hg_chrom1_OP50_2611	OG0001385Hg_chrom1_PA3_3299	OG0001385Hg_chrom1_TN20_2922	OG0001385Hg_chrom1_TN22_3300	OG0001385Hg_chrom1_TN7_3095	OG0001385Hg_chrom1_TN8_3209	OG0001385Hg_chrom2_TN10_5311	OG0001385chr4X12_20645
OG0005545	OG0010430Hg_chrom1_OP50_2615	OG0010430Hg_chrom1_PA3_3303	OG0010430Hg_chrom1_TN22_3303	OG0010430Hg_chrom1_TN7_3099	OG0010430Hg_chrom1_TN8_3214	OG0010430chr4X12_20644	OG0029247Hg_chrom1_MM26_6369	OG0029247Hg_chrom1_TN20_2927	OG0029247Hg_chrom2_TN10_5309
OG0005546	OG0003924Hg_chrom1_MM26_6376	OG0003924Hg_chrom1_OP50_2622	OG0003924Hg_chrom1_PA3_3311	OG0003924Hg_chrom1_TN20_2933	OG0003924Hg_chrom1_TN22_3309	OG0003924Hg_chrom1_TN7_3106	OG0003924Hg_chrom1_TN8_3220	OG0003924Hg_chrom2_TN10_5305	OG0003924chr4X12_20636
OG0005547	OG0016484Hg_chrom1_MM26_6378	OG0016484Hg_chrom1_PA3_3313	OG0016484Hg_chrom1_TN22_3312	OG0016484Hg_chrom1_TN7_3109	OG0016484Hg_chrom1_TN8_3222	OG0016484Hg_chrom2_TN10_5300	OG0016484chr4X12_20632	OG0038791Hg_chrom1_OP50_2624	OG0038791Hg_chrom1_TN20_2935
OG0005548	OG0002778Hg_chrom1_MM26_6382	OG0002778Hg_chrom1_PA3_3318	OG0002778Hg_chrom1_TN22_3318	OG0002778Hg_chrom1_TN7_3114	OG0002778Hg_chrom1_TN8_3227	OG0002778Hg_chrom2_TN10_5299	OG0002778chr4X12_20629	OG0038792Hg_chrom1_OP50_2627	OG0038792Hg_chrom1_TN20_2940
OG0005549	OG0002198Hg_chrom1_MM26_6383	OG0002198Hg_chrom1_OP50_263	OG0002198Hg_chrom1_PA3_3319	OG0002198Hg_chrom1_TN20_2942	OG0002198Hg_chrom1_TN22_3319	OG0002198Hg_chrom1_TN7_3115	OG0002198Hg_chrom1_TN8_3228	OG0002198Hg_chrom2_TN10_5297	OG0002198chr4X12_20627
OG0005550	OG0001968Hg_chrom1_MM26_6387	OG0001968Hg_chrom1_OP50_2631	OG0001968Hg_chrom1_TN20_2944	OG0001968Hg_chrom1_TN22_3321	OG0001968Hg_chrom1_TN7_3118	OG0001968Hg_chrom1_TN8_3230	OG0001968Hg_chrom2_TN10_5291	OG0001968chr4X12_20623	OG0026696Hg_chrom1_PA3_3322
OG0005551	OG0006562Hg_chrom1_MM26_6390	OG0006562Hg_chrom1_OP50_2634	OG0006562Hg_chrom1_TN20_2947	OG0006562Hg_chrom1_TN7_3121	OG0006562Hg_chrom1_TN8_3235	OG0019399Hg_chrom1_PA3_3325	OG0019399Hg_chrom1_TN22_3325	OG0041026Hg_chrom2_TN10_5290	OG0041026chr4X12_20619
OG0005552	OG0005055Hg_chrom1_MM26_6394	OG0005055Hg_chrom1_OP50_2638	OG0005055Hg_chrom1_TN20_2950	OG0005055Hg_chrom2_TN10_5280	OG0012839Hg_chrom1_PA3_3331	OG0012839Hg_chrom1_TN22_3330	OG0012839Hg_chrom1_TN7_3124	OG0012839Hg_chrom1_TN8_3240	OG0012839chr4X12_20609
OG0005553	OG0005786Hg_chrom1_MM26_6399	OG0005786Hg_chrom1_OP50_2658	OG0005786Hg_chrom1_PA3_3337	OG0005786Hg_chrom1_TN20_2955	OG0005786Hg_chrom1_TN22_3336	OG0005786Hg_chrom1_TN7_313	OG0005786Hg_chrom1_TN8_3246	OG0005786Hg_chrom2_TN10_5277	OG0027973chr4X12_20600
OG0005554	Hg_chrom1_TN7_3131	OG0008432Hg_chrom1_MM26_6404	OG0008432Hg_chrom1_OP50_2663	OG0008432Hg_chrom1_PA3_3339	OG0008432Hg_chrom1_TN20_2959	OG0008432Hg_chrom1_TN22_3339	OG0008432Hg_chrom1_TN8_3252	OG0008432Hg_chrom2_TN10_5273	OG0008432chr4X12_20595
OG0005555	OG0016485Hg_chrom1_MM26_6405	OG0016485Hg_chrom1_OP50_2664	OG0016485Hg_chrom1_TN20_2960	OG0016485Hg_chrom1_TN22_3341	OG0016485Hg_chrom1_TN8_3253	OG0016485chr4X12_20590	OG0016486Hg_chrom1_PA3_3343	OG0016486Hg_chrom1_TN7_3136	OG0016486Hg_chrom2_TN10_527
OG0005556	OG0011536Hg_chrom1_MM26_6412	OG0011536Hg_chrom1_OP50_267	OG0011536Hg_chrom1_PA3_3349	OG0011536Hg_chrom1_TN20_2966	OG0011536Hg_chrom1_TN7_3141	OG0011536Hg_chrom2_TN10_5268	OG0011536chr4X12_20587	OG0042514Hg_chrom1_TN22_3348	OG0042514Hg_chrom1_TN8_326
OG0005557	OG0014429Hg_chrom1_MM26_6414	OG0014429Hg_chrom1_OP50_2670	OG0014429Hg_chrom1_PA3_3351	OG0014429Hg_chrom1_TN20_2967	OG0014429Hg_chrom1_TN22_3350	OG0014429Hg_chrom1_TN7_3142	OG0014429Hg_chrom1_TN8_3261	OG0014429Hg_chrom2_TN10_5267	OG0014429chr4X12_20586
OG0005558	OG0016487Hg_chrom1_OP50_2671	OG0016487Hg_chrom1_PA3_3352	OG0016487Hg_chrom1_TN20_2968	OG0016487Hg_chrom1_TN8_3262	OG0016487Hg_chrom2_TN10_5266	OG0016487chr4X12_20585	OG0036141Hg_chrom1_TN22_3352	OG0036141Hg_chrom1_TN7_3146	OG0037259Hg_chrom1_MM26_6416
OG0005564	OG0002474Hg_chrom1_PA3_3456	OG0003495Hg_chrom1_MM26_6522	OG0003495Hg_chrom1_OP50_2759	OG0003495Hg_chrom1_TN20_3054	OG0003495Hg_chrom1_TN22_3445	OG0003495Hg_chrom1_TN7_3277	OG0003495Hg_chrom1_TN8_3352	OG0003495Hg_chrom2_TN10_5152	OG0003495chr4X12_20540
OG0005565	OG0002199Hg_chrom1_MM26_6533	OG0002199Hg_chrom1_OP50_2767	OG0002199Hg_chrom1_PA3_3464	OG0002199Hg_chrom1_TN20_3064	OG0002199Hg_chrom1_TN22_3451	OG0002199Hg_chrom1_TN7_3289	OG0002199Hg_chrom1_TN8_3365	OG0002199Hg_chrom2_TN10_5143	OG0002199chr4X12_20530
OG0005566	OG0001581Hg_chrom1_MM26_6539	OG0001581Hg_chrom1_OP50_277	OG0001581Hg_chrom1_PA3_3471	OG0001581Hg_chrom1_TN20_3067	OG0001581Hg_chrom1_TN22_346	OG0001581Hg_chrom1_TN8_337	OG0001581Hg_chrom2_TN10_5136	OG0001581chr4X12_20523	OG0026013Hg_chrom1_TN7_3297
OG0005567	OG0002779Hg_chrom1_OP50_2774	OG0002779Hg_chrom1_PA3_3478	OG0002779Hg_chrom1_TN22_3466	OG0002779Hg_chrom2_TN10_513	OG0002779chr4X12_20518	OG0011541Hg_chrom1_TN20_3071	OG0011541Hg_chrom1_TN7_3300	OG0011541Hg_chrom1_TN8_3374	OG0029251Hg_chrom1_MM26_6543
OG0005568	OG0012845Hg_chrom1_MM26_6548	OG0012845Hg_chrom1_OP50_2778	OG0012845Hg_chrom1_PA3_3481	OG0012845Hg_chrom1_TN20_3075	OG0012845Hg_chrom2_TN10_5128	OG0014435Hg_chrom1_TN22_3472	OG0014435Hg_chrom1_TN7_3309	OG0014435Hg_chrom1_TN8_3382	OG0014435chr4X12_20514
OG0005569	OG0008437Hg_chrom1_MM26_6563	OG0008437Hg_chrom1_OP50_279	OG0008437Hg_chrom1_PA3_3489	OG0008437Hg_chrom1_TN20_3082	OG0008437Hg_chrom1_TN22_348	OG0008437Hg_chrom1_TN7_3315	OG0008437Hg_chrom1_TN8_339	OG0008437Hg_chrom2_TN10_511	OG0008437chr4X12_20506
OG0005570	OG0019021Hg_chrom1_OP50_2790	OG0019021Hg_chrom1_TN20_3084	OG0019021Hg_chrom1_TN22_3481	OG0019021Hg_chrom2_TN10_5104	OG0024424Hg_chrom1_MM26_6566	OG0024424Hg_chrom1_PA3_3492	OG0024424Hg_chrom1_TN7_3318	OG0024424Hg_chrom1_TN8_3391	OG0024424chr4X12_20499
OG0005571	OG0010433Hg_chrom1_MM26_6572	OG0010433Hg_chrom1_OP50_2792	OG0010433Hg_chrom1_PA3_3497	OG0010433Hg_chrom1_TN20_3089	OG0010433Hg_chrom1_TN22_3486	OG0010433Hg_chrom1_TN7_3322	OG0010433Hg_chrom1_TN8_3396	OG0010433Hg_chrom2_TN10_5100	OG0010433chr4X12_20496
OG0005572	Hg_chrom1_TN7_3324	Hg_chrom2_TN10_5099	OG0011542Hg_chrom1_OP50_2794	OG0011542Hg_chrom1_PA3_3498	OG0011542Hg_chrom1_TN20_309	OG0011542chr4X12_20494	OG0028357Hg_chrom1_TN22_349	OG0032664Hg_chrom1_MM26_6575	OG0032664Hg_chrom1_TN8_3399
OG0005573	Hg_chrom1_OP50_2799	OG0003926Hg_chrom1_MM26_6578	OG0003926Hg_chrom1_PA3_3505	OG0003926Hg_chrom1_TN20_3091	OG0003926Hg_chrom1_TN22_3492	OG0003926Hg_chrom1_TN7_3329	OG0003926Hg_chrom1_TN8_3404	OG0003926Hg_chrom2_TN10_5095	OG0023779chr4X12_20488
OG0005574	OG0001766Hg_chrom1_MM26_6587	OG0001766Hg_chrom1_OP50_2800	OG0001766Hg_chrom1_PA3_3510	OG0001766Hg_chrom1_TN20_3098	OG0001766Hg_chrom1_TN22_3500	OG0001766Hg_chrom1_TN7_3334	OG0001766Hg_chrom1_TN8_3411	OG0001766Hg_chrom2_TN10_5090	OG0001766chr4X12_20483
OG0005575	OG0012846Hg_chrom1_MM26_6595	OG0012846Hg_chrom1_PA3_3517	OG0012846Hg_chrom1_TN20_3105	OG0012846Hg_chrom1_TN22_3507	OG0012846Hg_chrom1_TN7_3342	OG0012846Hg_chrom1_TN8_3419	OG0012846Hg_chrom2_TN10_5080	OG0012846chr4X12_20472	OG0030626Hg_chrom1_OP50_2809
OG0005576	OG0007477Hg_chrom1_MM26_6599	OG0007477Hg_chrom1_OP50_2810	OG0007477Hg_chrom1_PA3_3521	OG0007477Hg_chrom1_TN20_3108	OG0007477Hg_chrom1_TN22_351	OG0007477Hg_chrom1_TN7_3346	OG0007477Hg_chrom1_TN8_3422	OG0007477Hg_chrom2_TN10_5079	OG0007477chr4X12_20469
OG0005577	OG0003110Hg_chrom1_MM26_6607	OG0003110Hg_chrom1_OP50_2821	OG0003110Hg_chrom1_PA3_3532	OG0003110Hg_chrom1_TN20_3117	OG0003110Hg_chrom1_TN22_3519	OG0003110Hg_chrom1_TN7_3352	OG0003110Hg_chrom1_TN8_3430	OG0003110Hg_chrom2_TN10_5070	OG0003110chr4X12_20462
OG0005578	OG0002200Hg_chrom1_MM26_6627	OG0002200Hg_chrom1_OP50_2830	OG0002200Hg_chrom1_PA3_3548	OG0002200Hg_chrom1_TN20_3134	OG0002200Hg_chrom1_TN7_3368	OG0002200chr4X12_20444	OG0012847Hg_chrom1_TN22_3537	OG0012847Hg_chrom1_TN8_3446	OG0012847Hg_chrom2_TN10_5049
OG0005579	OG0016497Hg_chrom1_MM26_6639	OG0016497Hg_chrom1_TN22_3552	OG0016497Hg_chrom1_TN7_3382	OG0016497Hg_chrom1_TN8_3463	OG0016497chr4X12_20429	OG0030627Hg_chrom1_OP50_2843	OG0030627Hg_chrom1_PA3_3557	OG0030627Hg_chrom1_TN20_3151	OG0030627Hg_chrom2_TN10_5035
OG0005580	OG0006446Hg_chrom1_OP50_2849	OG0006446Hg_chrom1_TN20_3159	OG0006446Hg_chrom1_TN22_3557	OG0006446Hg_chrom1_TN7_3387	OG0006446Hg_chrom1_TN8_3468	OG0006446Hg_chrom2_TN10_503	OG0006446chr4X12_20424	OG0022168Hg_chrom1_MM26_6644	OG0022168Hg_chrom1_PA3_3562
OG0005581	OG0012848Hg_chrom1_MM26_6648	OG0012848Hg_chrom1_OP50_285	OG0012848Hg_chrom1_PA3_3566	OG0012848Hg_chrom1_TN20_3160	OG0012848Hg_chrom1_TN22_3558	OG0012848Hg_chrom1_TN7_339	OG0012848Hg_chrom1_TN8_3470	OG0012848Hg_chrom2_TN10_5028	OG0012848chr4X12_20422
OG0005582	Hg_chrom1_TN8_3472	OG0007479Hg_chrom1_MM26_6649	OG0007479Hg_chrom1_OP50_2851	OG0007479Hg_chrom1_PA3_3567	OG0007479Hg_chrom1_TN20_3161	OG0007479Hg_chrom1_TN22_3559	OG0007479Hg_chrom1_TN7_3392	OG0007479Hg_chrom2_TN10_5027	OG0007479chr4X12_20420
OG0005583	OG0008440Hg_chrom1_MM26_6651	OG0008440Hg_chrom1_PA3_3569	OG0008440Hg_chrom1_TN20_3163	OG0008440Hg_chrom2_TN10_5025	OG0008440chr4X12_20419	OG0030628Hg_chrom1_OP50_2853	OG0030628Hg_chrom1_TN22_3560	OG0030628Hg_chrom1_TN7_3393	OG0030628Hg_chrom1_TN8_3473
OG0005584	OG0007480Hg_chrom1_MM26_6658	OG0007480Hg_chrom1_OP50_2861	OG0007480Hg_chrom1_PA3_3574	OG0007480Hg_chrom1_TN20_317	OG0007480Hg_chrom1_TN22_3566	OG0007480Hg_chrom1_TN7_340	OG0007480Hg_chrom1_TN8_3479	OG0007480Hg_chrom2_TN10_5021	OG0007480chr4X12_20413
OG0005585	OG0010434Hg_chrom1_MM26_6661	OG0010434Hg_chrom1_OP50_2859	OG0010434Hg_chrom1_TN20_3174	OG0010434Hg_chrom1_TN22_3568	OG0010434Hg_chrom1_TN7_3401	OG0010434Hg_chrom1_TN8_3480	OG0010434chr4X12_20411	OG0025719Hg_chrom1_PA3_3579	OG0025719Hg_chrom2_TN10_5018
OG0005586	OG0001971Hg_chrom1_MM26_6662	OG0001971Hg_chrom1_OP50_2863	OG0001971Hg_chrom1_PA3_3580	OG0001971Hg_chrom1_TN20_3176	OG0001971Hg_chrom1_TN22_3570	OG0001971Hg_chrom1_TN7_3404	OG0001971Hg_chrom1_TN8_3483	OG0001971Hg_chrom2_TN10_5014	OG0001971chr4X12_20409
OG0005587	OG0003112Hg_chrom1_MM26_6667	OG0003112Hg_chrom1_OP50_2868	OG0003112Hg_chrom1_PA3_3584	OG0003112Hg_chrom1_TN20_3180	OG0003112Hg_chrom1_TN22_3575	OG0003112Hg_chrom1_TN7_3408	OG0003112Hg_chrom1_TN8_3487	OG0003112Hg_chrom2_TN10_5009	OG0003112chr4X12_20406
OG0005588	OG0005789Hg_chrom1_MM26_6671	OG0005789Hg_chrom1_OP50_2870	OG0005789Hg_chrom1_PA3_3586	OG0005789Hg_chrom1_TN20_3182	OG0005789Hg_chrom1_TN22_3579	OG0005789Hg_chrom1_TN7_3411	OG0005789Hg_chrom1_TN8_349	OG0005789Hg_chrom2_TN10_5006	OG0005789chr4X12_20404
OG0005589	Hg_chrom1_TN7_3422	Hg_chrom1_TN8_3500	Hg_chrom2_TN10_4991	OG0008443Hg_chrom1_MM26_6685	OG0008443Hg_chrom1_OP50_2882	OG0008443Hg_chrom1_PA3_3601	OG0008443Hg_chrom1_TN20_3193	OG0008443Hg_chrom1_TN22_3588	OG0008443chr4X12_20392
OG0005590	Hg_chrom1_TN22_3599	OG0004464Hg_chrom1_MM26_6704	OG0004464Hg_chrom1_PA3_3616	OG0004464Hg_chrom1_TN7_3435	OG0004464Hg_chrom2_TN10_497	OG0027977Hg_chrom1_OP50_2897	OG0027977Hg_chrom1_TN20_3209	OG0027977Hg_chrom1_TN8_3519	OG0027977chr4X12_20374
OG0005591	OG0014439Hg_chrom1_MM26_6730	OG0014439Hg_chrom1_OP50_2920	OG0014439Hg_chrom1_PA3_3642	OG0014439Hg_chrom1_TN20_3231	OG0014439Hg_chrom1_TN22_3628	OG0014439Hg_chrom1_TN7_3477	OG0014439Hg_chrom1_TN8_3542	OG0014439Hg_chrom2_TN10_4935	chr4X12_20351
OG0005600	OG0005795Hg_chrom1_MM26_6856	OG0005795Hg_chrom1_PA3_3757	OG0005795Hg_chrom1_TN20_333	OG0005795Hg_chrom1_TN22_374	OG0005795Hg_chrom1_TN8_3655	OG0005795Hg_chrom2_TN10_485	OG0005795chr4X12_20341	OG0030631Hg_chrom1_OP50_302	OG0030631Hg_chrom1_TN7_359
OG0005601	OG0016511Hg_chrom1_MM26_6867	OG0016511Hg_chrom1_OP50_3029	OG0016511Hg_chrom1_PA3_3768	OG0016511Hg_chrom1_TN20_3340	OG0016511Hg_chrom1_TN22_375	OG0016511Hg_chrom1_TN7_3605	OG0016511Hg_chrom1_TN8_3663	OG0016511Hg_chrom2_TN10_4791	OG0016511chr4X12_20330
OG0005602	OG0014447Hg_chrom1_MM26_6873	OG0014447Hg_chrom1_OP50_3032	OG0014447Hg_chrom1_PA3_3776	OG0014447Hg_chrom1_TN20_3347	OG0014447Hg_chrom1_TN22_3755	OG0014447Hg_chrom1_TN7_3609	OG0014447Hg_chrom1_TN8_367	OG0014447Hg_chrom2_TN10_4786	OG0041007chr4X12_20324
OG0005603	OG0016512Hg_chrom1_MM26_6874	OG0016512Hg_chrom1_OP50_3033	OG0016512Hg_chrom1_PA3_3777	OG0016512Hg_chrom1_TN20_3348	OG0016512Hg_chrom1_TN22_3756	OG0016512Hg_chrom1_TN7_361	OG0016512Hg_chrom1_TN8_3670	OG0016512Hg_chrom2_TN10_4783	OG0016512chr4X12_20318
OG0005604	OG0006568Hg_chrom1_MM26_6881	OG0006568Hg_chrom1_OP50_3037	OG0006568Hg_chrom1_TN7_3614	OG0006568chr4X12_20314	OG0012853Hg_chrom1_PA3_3778	OG0012853Hg_chrom1_TN20_3351	OG0012853Hg_chrom1_TN22_3759	OG0012853Hg_chrom1_TN8_3674	OG0012853Hg_chrom2_TN10_4779
OG0005605	OG0004466Hg_chrom1_OP50_3038	OG0004466Hg_chrom1_PA3_3782	OG0004466Hg_chrom1_TN7_3615	OG0004466Hg_chrom1_TN8_3679	OG0026712Hg_chrom1_MM26_6884	OG0026712Hg_chrom1_TN20_3353	OG0026712Hg_chrom1_TN22_3762	OG0026712Hg_chrom2_TN10_4771	OG0026712chr4X12_20310
OG0005606	Hg_chrom1_MM26_6886	OG0005796Hg_chrom1_OP50_3040	OG0005796Hg_chrom1_TN20_3354	OG0005796Hg_chrom1_TN22_3765	OG0005796Hg_chrom1_TN7_3618	OG0005796Hg_chrom1_TN8_3681	OG0022180Hg_chrom1_PA3_3786	OG0022180Hg_chrom2_TN10_4769	OG0022180chr4X12_20307
OG0005608	OG0001767Hg_chrom1_MM26_6937	OG0001767Hg_chrom1_OP50_3073	OG0001767Hg_chrom1_TN7_3668	OG0001767Hg_chrom1_TN8_3726	OG0001767Hg_chrom2_TN10_4732	OG0001767chr4X12_20261	OG0019428Hg_chrom1_PA3_3834	OG0019428Hg_chrom1_TN20_3399	OG0019428Hg_chrom1_TN22_3804
OG0005609	OG0001229Hg_chrom1_OP50_309	OG0001229Hg_chrom1_TN20_3409	OG0001229Hg_chrom2_TN10_4709	OG0001229chr4X12_20241	OG0009279Hg_chrom1_PA3_3852	OG0009279Hg_chrom1_TN22_3825	OG0009279Hg_chrom1_TN7_3684	OG0009279Hg_chrom1_TN8_3747	OG0029260Hg_chrom1_MM26_6960
OG0005610	OG0010268Hg_chrom1_OP50_3104	OG0010268Hg_chrom1_PA3_3860	OG0010268Hg_chrom1_TN20_3416	OG0010268Hg_chrom1_TN22_3832	OG0010268Hg_chrom1_TN7_3694	OG0010268Hg_chrom1_TN8_3756	OG0010268chr4X12_20226	OG0011555Hg_chrom1_MM26_6969	OG0030634Hg_chrom2_TN10_4690
OG0005611	OG0000054Hg_chrom1_MM26_6982	OG0000054Hg_chrom1_OP50_3112	OG0000054Hg_chrom1_PA3_3869	OG0000054Hg_chrom1_TN20_3419	OG0000054Hg_chrom1_TN22_3840	OG0000054Hg_chrom1_TN7_3702	OG0000054Hg_chrom1_TN8_3764	OG0000054Hg_chrom2_TN10_4679	OG0000054chr4X12_20220
OG0005612	OG0016519Hg_chrom1_MM26_6986	OG0016519Hg_chrom1_OP50_3120	OG0016519Hg_chrom1_PA3_3881	OG0016519Hg_chrom1_TN20_343	OG0016519Hg_chrom1_TN22_3846	OG0016519Hg_chrom1_TN7_3709	OG0016519Hg_chrom1_TN8_377	OG0016519Hg_chrom2_TN10_4671	OG0022181chr4X12_20214
OG0005613	Hg_chrom1_TN7_3719	OG0000052Hg_chrom1_MM26_6996	OG0000052Hg_chrom1_PA3_3885	OG0000052Hg_chrom1_TN20_3432	OG0000052Hg_chrom1_TN22_3853	OG0000052Hg_chrom1_TN8_3779	OG0000052Hg_chrom2_TN10_4663	OG0000052chr4X12_20205	OG0004468Hg_chrom1_OP50_3126
OG0005614	OG0007485Hg_chrom1_TN7_3731	OG0016520Hg_chrom1_MM26_7010	OG0016520Hg_chrom1_OP50_3274	OG0016520Hg_chrom1_PA3_3904	OG0016520Hg_chrom1_TN20_3445	OG0016520Hg_chrom1_TN22_3867	OG0016520Hg_chrom1_TN8_379	OG0016520Hg_chrom2_TN10_4645	OG0016520chr4X12_20192
OG0005615	Hg_chrom1_TN7_3739	OG0005800Hg_chrom1_MM26_7014	OG0005800Hg_chrom1_OP50_3275	OG0005800Hg_chrom1_PA3_3912	OG0005800Hg_chrom1_TN20_3448	OG0005800Hg_chrom1_TN8_3796	OG0005800Hg_chrom2_TN10_4641	OG0005800chr4X12_20189	OG0012857Hg_chrom1_TN22_3872
OG0005616	OG0008446Hg_chrom1_MM26_7019	OG0008446Hg_chrom1_OP50_328	OG0008446Hg_chrom1_PA3_3918	OG0008446Hg_chrom1_TN20_3455	OG0008446Hg_chrom1_TN22_3873	OG0008446Hg_chrom1_TN7_3740	OG0008446Hg_chrom1_TN8_3798	OG0008446Hg_chrom2_TN10_4636	OG0008446chr4X12_20183
OG0005617	OG0003499Hg_chrom1_MM26_7022	OG0003499Hg_chrom1_OP50_3282	OG0003499Hg_chrom1_PA3_3921	OG0003499Hg_chrom1_TN20_3458	OG0003499Hg_chrom1_TN22_3877	OG0003499Hg_chrom1_TN7_3743	OG0003499Hg_chrom1_TN8_3800	OG0003499Hg_chrom2_TN10_4634	OG0003499chr4X12_20179
OG0005618	OG0003500Hg_chrom1_MM26_7023	OG0003500Hg_chrom1_OP50_3286	OG0003500Hg_chrom1_PA3_3923	OG0003500Hg_chrom1_TN20_3460	OG0003500Hg_chrom1_TN22_3879	OG0003500Hg_chrom1_TN7_3745	OG0003500Hg_chrom1_TN8_3802	OG0003500Hg_chrom2_TN10_4630	OG0003500chr4X12_20176
OG0005619	Hg_chrom1_TN7_3749	OG0010438Hg_chrom1_MM26_7027	OG0010438Hg_chrom1_OP50_3290	OG0010438Hg_chrom1_PA3_3927	OG0010438Hg_chrom1_TN20_3461	OG0010438Hg_chrom1_TN22_3882	OG0010438Hg_chrom1_TN8_3806	OG0010438Hg_chrom2_TN10_4628	OG0010438chr4X12_20174
OG0005621	OG0008447Hg_chrom1_MM26_7066	OG0008447Hg_chrom1_OP50_3323	OG0008447Hg_chrom1_PA3_3971	OG0008447Hg_chrom1_TN20_3499	OG0008447Hg_chrom1_TN22_3917	OG0008447Hg_chrom1_TN7_3789	OG0008447Hg_chrom1_TN8_3839	OG0008447Hg_chrom2_TN10_4581	OG0008447chr4X12_20164
OG0005625	Hg_chrom1_TN8_3880	OG0007487Hg_chrom1_MM26_7121	OG0007487Hg_chrom1_OP50_3333	OG0007487Hg_chrom1_PA3_4003	OG0007487Hg_chrom1_TN20_3529	OG0007487Hg_chrom1_TN22_3956	OG0007487Hg_chrom1_TN7_3832	OG0007487Hg_chrom2_TN10_4549	OG0007487chr4X12_19952
OG0005626	OG0009392Hg_chrom1_OP50_3226	OG0011558Hg_chrom1_MM26_7124	OG0011558Hg_chrom1_PA3_4005	OG0011558Hg_chrom1_TN20_353	OG0011558Hg_chrom1_TN22_3959	OG0011558Hg_chrom1_TN7_3834	OG0011558Hg_chrom1_TN8_3884	OG0011558Hg_chrom2_TN10_4547	OG0011558chr4X12_19948
OG0005627	OG0002784Hg_chrom1_MM26_7129	OG0002784Hg_chrom1_OP50_3222	OG0002784Hg_chrom1_PA3_4011	OG0002784Hg_chrom1_TN20_3535	OG0002784Hg_chrom1_TN22_3964	OG0002784Hg_chrom1_TN7_3838	OG0002784Hg_chrom1_TN8_3888	OG0002784Hg_chrom2_TN10_4542	OG0002784chr4X12_19944
OG0005628	OG0016524Hg_chrom1_MM26_7135	OG0016524Hg_chrom1_OP50_3220	OG0016524Hg_chrom1_PA3_4014	OG0016524Hg_chrom1_TN20_3537	OG0016524Hg_chrom1_TN22_3968	OG0016524Hg_chrom1_TN7_3840	OG0016524Hg_chrom1_TN8_3892	OG0016524Hg_chrom2_TN10_454	OG0016524chr4X12_19942
OG0005629	OG0002203Hg_chrom1_MM26_7176	OG0002203Hg_chrom1_OP50_3205	OG0002203Hg_chrom1_PA3_4038	OG0002203Hg_chrom1_TN20_3555	OG0002203Hg_chrom1_TN22_3992	OG0002203Hg_chrom1_TN7_3860	OG0002203Hg_chrom1_TN8_3913	OG0002203Hg_chrom2_TN10_4518	OG0002203chr4X12_19915
OG0005630	OG0014457Hg_chrom1_MM26_7180	OG0014457Hg_chrom1_OP50_3201	OG0014457Hg_chrom1_PA3_4041	OG0014457Hg_chrom1_TN20_3559	OG0014457Hg_chrom1_TN22_3997	OG0014457Hg_chrom1_TN7_3864	OG0014457Hg_chrom1_TN8_3917	OG0014457Hg_chrom2_TN10_4516	OG0014457chr4X12_19913
OG0005631	OG0016526Hg_chrom1_MM26_7182	OG0016526Hg_chrom1_OP50_320	OG0016526Hg_chrom1_PA3_4042	OG0016526Hg_chrom1_TN20_356	OG0016526Hg_chrom1_TN22_400	OG0016526Hg_chrom1_TN7_3866	OG0016526Hg_chrom1_TN8_392	OG0016526Hg_chrom2_TN10_4513	OG0016526chr4X12_19912
OG0005632	OG0008453Hg_chrom1_MM26_7183	OG0008453Hg_chrom2_TN10_451	OG0016527Hg_chrom1_OP50_3197	OG0016527Hg_chrom1_PA3_4045	OG0016527Hg_chrom1_TN20_3560	OG0016527Hg_chrom1_TN7_3867	OG0019436Hg_chrom1_TN22_4001	OG0019436Hg_chrom1_TN8_3921	OG0019436chr4X12_19907
OG0005633	OG0012863Hg_chrom1_MM26_7191	OG0012863Hg_chrom1_OP50_3192	OG0012863Hg_chrom1_PA3_4048	OG0012863Hg_chrom1_TN20_3563	OG0012863Hg_chrom1_TN22_4008	OG0012863Hg_chrom1_TN7_3873	OG0012863Hg_chrom1_TN8_3928	OG0012863Hg_chrom2_TN10_4505	OG0012863chr4X12_19902
OG0005634	OG0005060Hg_chrom1_MM26_7194	OG0005060Hg_chrom1_OP50_319	OG0005060Hg_chrom1_PA3_4051	OG0005060Hg_chrom1_TN20_3566	OG0005060Hg_chrom1_TN22_4010	OG0005060Hg_chrom1_TN7_3877	OG0005060Hg_chrom1_TN8_3930	OG0005060Hg_chrom2_TN10_450	OG0005060chr4X12_19899
OG0005636	OG0011563Hg_chrom1_MM26_7236	OG0011563Hg_chrom1_OP50_3157	OG0011563Hg_chrom1_PA3_4088	OG0011563Hg_chrom1_TN20_3605	OG0011563Hg_chrom1_TN22_4049	OG0011563Hg_chrom1_TN7_391	OG0011563Hg_chrom1_TN8_3961	OG0011563Hg_chrom2_TN10_4447	OG0011563chr4X12_19863
OG0005638	OG0003933Hg_chrom1_MM26_7366	OG0003933Hg_chrom1_OP50_3419	OG0003933Hg_chrom1_PA3_4229	OG0003933Hg_chrom1_TN20_3700	OG0003933Hg_chrom1_TN22_4177	OG0003933Hg_chrom1_TN7_4054	OG0003933Hg_chrom1_TN8_4086	OG0003933Hg_chrom2_TN10_4284	OG0003933chr4X12_19718
OG0005639	Hg_chrom1_MM26_7371	OG0004472Hg_chrom1_OP50_3424	OG0004472Hg_chrom1_PA3_4233	OG0004472Hg_chrom1_TN20_3705	OG0004472Hg_chrom1_TN22_4182	OG0004472Hg_chrom1_TN7_4059	OG0004472Hg_chrom1_TN8_4091	OG0004472Hg_chrom2_TN10_428	OG0004472chr4X12_19713
OG0005640	OG0014463Hg_chrom1_MM26_7376	OG0014463Hg_chrom1_OP50_3427	OG0014463Hg_chrom1_PA3_4237	OG0014463Hg_chrom1_TN20_3709	OG0014463Hg_chrom1_TN22_4186	OG0014463Hg_chrom1_TN7_4061	OG0014463Hg_chrom1_TN8_4093	OG0014463Hg_chrom2_TN10_4279	OG0014463chr4X12_19710
OG0005641	OG0012871Hg_chrom1_MM26_7378	OG0012871Hg_chrom1_OP50_3429	OG0012871Hg_chrom1_PA3_4238	OG0012871Hg_chrom1_TN22_4188	OG0012871Hg_chrom1_TN7_4062	OG0012871Hg_chrom1_TN8_4094	OG0012871chr4X12_19708	OG0014464Hg_chrom1_TN20_371	OG0014464Hg_chrom2_TN10_4278
OG0005642	OG0016535Hg_chrom1_MM26_7381	OG0016535Hg_chrom1_OP50_3430	OG0016535Hg_chrom1_TN7_4064	OG0016535Hg_chrom2_TN10_4275	OG0019441Hg_chrom1_PA3_4242	OG0019441Hg_chrom1_TN20_3712	OG0019441Hg_chrom1_TN22_4190	OG0019441Hg_chrom1_TN8_4097	OG0019441chr4X12_19706
OG0005643	OG0014466Hg_chrom1_MM26_7410	OG0014466Hg_chrom1_OP50_3445	OG0014466Hg_chrom1_PA3_4260	OG0014466Hg_chrom1_TN20_3726	OG0014466Hg_chrom1_TN22_4216	OG0014466Hg_chrom1_TN7_4089	OG0014466Hg_chrom1_TN8_4118	OG0014466Hg_chrom2_TN10_4253	OG0014466chr4X12_19685
OG0005645	OG0001003Hg_chrom1_MM26_7425	OG0001003Hg_chrom1_OP50_3460	OG0001003Hg_chrom1_PA3_4275	OG0001003Hg_chrom1_TN20_3738	OG0001003Hg_chrom1_TN22_423	OG0001003Hg_chrom1_TN7_4104	OG0001003Hg_chrom1_TN8_4135	OG0001003Hg_chrom2_TN10_4242	OG0001003chr4X12_19670
OG0005648	OG0014469Hg_chrom1_MM26_7490	OG0014469Hg_chrom1_OP50_355	OG0014469Hg_chrom1_PA3_4383	OG0014469Hg_chrom1_TN20_3834	OG0014469Hg_chrom1_TN22_4324	OG0014469Hg_chrom1_TN7_4159	OG0014469Hg_chrom1_TN8_423	OG0014469Hg_chrom2_TN10_4084	OG0014469chr4X12_19495
OG0005649	Hg_chrom1_TN8_4229	OG0012876Hg_chrom1_OP50_3547	OG0012876Hg_chrom1_PA3_4379	OG0012876Hg_chrom1_TN20_3832	OG0012876Hg_chrom1_TN7_416	OG0012876chr4X12_19497	OG0024451Hg_chrom1_MM26_7493	OG0024451Hg_chrom1_TN22_4321	OG0024451Hg_chrom2_TN10_4088
OG0005650	OG0001771Hg_chrom1_OP50_356	OG0001771Hg_chrom1_TN20_3845	OG0001771Hg_chrom2_TN10_4055	OG0012878Hg_chrom1_MM26_7551	OG0012878Hg_chrom1_PA3_4397	OG0012878Hg_chrom1_TN22_4332	OG0012878Hg_chrom1_TN7_421	OG0012878Hg_chrom1_TN8_424	OG0012878chr4X12_19486
OG0005651	OG0000305Hg_chrom1_PA3_4405	OG0012879Hg_chrom1_MM26_7564	OG0012879Hg_chrom1_OP50_3565	OG0012879Hg_chrom1_TN22_4341	OG0012879Hg_chrom1_TN7_4216	OG0012879Hg_chrom2_TN10_4045	OG0012879chr4X12_19477	OG0042120Hg_chrom1_TN20_3851	OG0042120Hg_chrom1_TN8_4246
OG0005652	OG0014471Hg_chrom1_MM26_7570	OG0014471Hg_chrom1_OP50_3572	OG0014471Hg_chrom1_PA3_4411	OG0014471Hg_chrom1_TN20_386	OG0014471Hg_chrom1_TN22_4347	OG0014471Hg_chrom1_TN7_4222	OG0014471Hg_chrom1_TN8_4254	OG0014471Hg_chrom2_TN10_4036	OG0014471chr4X12_19471
OG0005653	OG0009399Hg_chrom1_MM26_7573	OG0009399Hg_chrom1_PA3_4414	OG0009399Hg_chrom1_TN22_435	OG0009399Hg_chrom1_TN8_4257	OG0010443Hg_chrom1_OP50_3574	OG0010443Hg_chrom1_TN20_3862	OG0010443Hg_chrom1_TN7_4226	OG0010443Hg_chrom2_TN10_4033	OG0010443chr4X12_19467
OG0005654	OG0006581Hg_chrom1_MM26_7583	OG0006581Hg_chrom1_OP50_3582	OG0006581Hg_chrom1_PA3_4424	OG0006581Hg_chrom1_TN20_3868	OG0006581Hg_chrom1_TN22_4357	OG0006581Hg_chrom1_TN7_4232	OG0006581Hg_chrom1_TN8_4263	OG0006581Hg_chrom2_TN10_4024	OG0006581chr4X12_19460
OG0005655	OG0007495Hg_chrom1_MM26_7603	OG0007495Hg_chrom1_OP50_3594	OG0007495Hg_chrom1_PA3_4436	OG0007495Hg_chrom1_TN20_3878	OG0007495Hg_chrom1_TN22_4368	OG0007495Hg_chrom1_TN7_4244	OG0007495Hg_chrom1_TN8_4276	OG0007495Hg_chrom2_TN10_4004	OG0007495chr4X12_19446
OG0005656	OG0012880Hg_chrom1_MM26_7610	OG0012880Hg_chrom1_OP50_3597	OG0012880Hg_chrom1_PA3_4442	OG0012880Hg_chrom1_TN20_388	OG0012880Hg_chrom1_TN22_4371	OG0012880Hg_chrom1_TN7_425	OG0012880Hg_chrom1_TN8_4281	OG0012880Hg_chrom2_TN10_4003	OG0012880chr4X12_19443
OG0005657	OG0016549Hg_chrom1_MM26_7624	OG0016549Hg_chrom1_OP50_3609	OG0016549Hg_chrom1_PA3_4457	OG0016549Hg_chrom1_TN20_3891	OG0016549Hg_chrom1_TN22_4384	OG0016549Hg_chrom1_TN7_4261	OG0016549Hg_chrom1_TN8_4295	OG0016549Hg_chrom2_TN10_3997	OG0016549chr4X12_19432
OG0005659	OG0014473Hg_chrom1_MM26_7653	OG0014473Hg_chrom1_OP50_3623	OG0014473Hg_chrom1_PA3_4627	OG0014473Hg_chrom1_TN20_3905	OG0014473Hg_chrom2_TN10_3927	OG0014473chr4X12_19382	OG0036150Hg_chrom1_TN22_4405	OG0036150Hg_chrom1_TN7_4288	OG0036150Hg_chrom1_TN8_4332
OG0005660	OG0016552Hg_chrom1_MM26_7674	OG0016552Hg_chrom1_OP50_3635	OG0016552Hg_chrom1_PA3_4611	OG0016552Hg_chrom1_TN20_3915	OG0016552Hg_chrom1_TN22_4418	OG0016552Hg_chrom1_TN7_4298	OG0016552Hg_chrom1_TN8_4343	OG0016552Hg_chrom2_TN10_3936	OG0016552chr4X12_19367
OG0005661	Hg_chrom1_MM26_7677	OG0016553Hg_chrom1_OP50_3637	OG0016553Hg_chrom1_PA3_4608	OG0016553Hg_chrom1_TN20_3917	OG0016553Hg_chrom1_TN22_4419	OG0016553Hg_chrom1_TN7_4299	OG0016553Hg_chrom1_TN8_4345	OG0016553Hg_chrom2_TN10_3939	OG0016553chr4X12_19364
OG0005662	OG0014475Hg_chrom1_TN20_3918	OG0014475Hg_chrom2_TN10_394	OG0022200Hg_chrom1_MM26_7678	OG0022200Hg_chrom1_OP50_3638	OG0022200Hg_chrom1_PA3_4607	OG0022200Hg_chrom1_TN22_4421	OG0022200Hg_chrom1_TN7_430	OG0022200Hg_chrom1_TN8_4348	OG0022200chr4X12_19363
OG0005663	OG0002481Hg_chrom1_OP50_3649	OG0002481Hg_chrom1_TN7_4310	OG0002481chr4X12_19350	OG0014476Hg_chrom1_MM26_7690	OG0014476Hg_chrom1_PA3_4597	OG0014476Hg_chrom1_TN20_3926	OG0014476Hg_chrom2_TN10_3953	OG0042529Hg_chrom1_TN22_4433	OG0042529Hg_chrom1_TN8_4359
OG0005664	OG0011572Hg_chrom1_MM26_7694	OG0011572Hg_chrom1_PA3_4594	OG0011572Hg_chrom2_TN10_3960	OG0011572chr4X12_19344	OG0016554Hg_chrom1_OP50_3651	OG0016554Hg_chrom1_TN20_3930	OG0016554Hg_chrom1_TN22_4441	OG0016554Hg_chrom1_TN7_4316	OG0016554Hg_chrom1_TN8_4365
OG0005665	OG0016555Hg_chrom1_MM26_7698	OG0016555Hg_chrom1_OP50_3652	OG0016555Hg_chrom1_PA3_4590	OG0016555Hg_chrom1_TN20_3932	OG0016555Hg_chrom1_TN22_4442	OG0016555Hg_chrom1_TN7_4317	OG0016555Hg_chrom1_TN8_4367	OG0016555Hg_chrom2_TN10_3965	OG0016555chr4X12_19339
OG0005667	OG0005811Hg_chrom1_MM26_7739	OG0005811Hg_chrom1_OP50_3694	OG0005811Hg_chrom1_PA3_4557	OG0005811Hg_chrom1_TN20_3963	OG0005811Hg_chrom1_TN22_448	OG0005811Hg_chrom1_TN7_4351	OG0005811Hg_chrom1_TN8_4399	OG0005811Hg_chrom2_TN10_390	OG0005811chr4X12_19306
OG0005668	OG0001774Hg_chrom1_MM26_7742	OG0001774Hg_chrom1_OP50_3696	OG0001774Hg_chrom1_PA3_4555	OG0001774Hg_chrom1_TN20_3964	OG0001774Hg_chrom1_TN22_4483	OG0001774Hg_chrom1_TN7_4353	OG0001774Hg_chrom1_TN8_4402	OG0001774Hg_chrom2_TN10_39	OG0001774chr4X12_19303
OG0005669	OG0014477Hg_chrom1_MM26_7744	OG0014477Hg_chrom1_OP50_370	OG0014477Hg_chrom1_PA3_4551	OG0014477Hg_chrom1_TN20_3966	OG0014477Hg_chrom1_TN22_4487	OG0014477Hg_chrom1_TN7_4357	OG0014477Hg_chrom1_TN8_4406	OG0014477Hg_chrom2_TN10_3898	OG0014477chr4X12_19301
OG0005670	OG0012885Hg_chrom1_MM26_7745	OG0012885Hg_chrom1_OP50_3700	OG0012885Hg_chrom1_PA3_4550	OG0012885Hg_chrom1_TN20_3968	OG0012885Hg_chrom1_TN22_4488	OG0012885Hg_chrom1_TN7_4359	OG0012885Hg_chrom1_TN8_4407	OG0012885Hg_chrom2_TN10_3895	OG0012885chr4X12_19300
OG0005671	OG0007498Hg_chrom1_MM26_7753	OG0007498Hg_chrom1_OP50_3705	OG0007498Hg_chrom1_PA3_4544	OG0007498Hg_chrom1_TN20_3970	OG0007498Hg_chrom1_TN22_4491	OG0007498Hg_chrom1_TN7_4363	OG0007498Hg_chrom1_TN8_4410	OG0007498Hg_chrom2_TN10_389	OG0007498chr4X12_19297
OG0005672	OG0004476Hg_chrom1_MM26_7763	OG0004476Hg_chrom1_OP50_3710	OG0004476Hg_chrom1_PA3_4540	OG0004476Hg_chrom1_TN20_3976	OG0004476Hg_chrom1_TN22_4499	OG0004476Hg_chrom1_TN7_4367	OG0004476Hg_chrom1_TN8_4417	OG0004476Hg_chrom2_TN10_3884	OG0004476chr4X12_19290
OG0005673	OG0014139Hg_chrom1_OP50_3713	OG0014139Hg_chrom1_PA3_4537	OG0014139Hg_chrom1_TN20_3978	OG0014139Hg_chrom1_TN22_4500	OG0014139Hg_chrom1_TN7_4369	OG0014139Hg_chrom1_TN8_4419	OG0014139Hg_chrom2_TN10_3880	OG0014139chr4X12_19288	OG0016557Hg_chrom1_MM26_7766
OG0005674	OG0000719Hg_chrom1_MM26_7768	OG0000719Hg_chrom1_OP50_3716	OG0000719Hg_chrom1_PA3_4534	OG0000719Hg_chrom1_TN20_3980	OG0000719Hg_chrom1_TN22_4505	OG0000719Hg_chrom1_TN7_4372	OG0000719Hg_chrom1_TN8_4423	OG0000719Hg_chrom2_TN10_3876	OG0000719chr4X12_19283
OG0005675	OG0011573Hg_chrom1_MM26_7773	OG0011573Hg_chrom1_OP50_372	OG0011573Hg_chrom1_PA3_4530	OG0011573Hg_chrom1_TN20_3986	OG0011573Hg_chrom1_TN22_4508	OG0011573Hg_chrom1_TN7_4378	OG0011573Hg_chrom1_TN8_4426	OG0011573Hg_chrom2_TN10_3867	OG0011573chr4X12_19277
OG0005676	OG0006583Hg_chrom1_MM26_7776	OG0006583Hg_chrom1_OP50_3722	OG0006583Hg_chrom1_PA3_4527	OG0006583Hg_chrom1_TN20_3988	OG0006583Hg_chrom1_TN22_4511	OG0006583Hg_chrom1_TN7_438	OG0006583Hg_chrom1_TN8_443	OG0006583Hg_chrom2_TN10_3865	OG0006583chr4X12_19273
OG0005677	OG0007499Hg_chrom1_MM26_7779	OG0007499Hg_chrom1_OP50_3724	OG0007499Hg_chrom1_PA3_4524	OG0007499Hg_chrom1_TN20_3989	OG0007499Hg_chrom1_TN22_4513	OG0007499Hg_chrom1_TN7_4382	OG0007499Hg_chrom1_TN8_4432	OG0007499Hg_chrom2_TN10_3862	OG0007499chr4X12_19271
OG0005678	OG0014479Hg_chrom1_TN7_442	OG0014479Hg_chrom2_TN10_3648	OG0025727Hg_chrom1_OP50_3749	OG0025727Hg_chrom1_PA3_4644	OG0025727Hg_chrom1_TN20_4032	OG0025727Hg_chrom1_TN22_4576	OG0025727Hg_chrom1_TN8_4481	OG0025727chr4X12_19143	OG0037287Hg_chrom1_MM26_7831
OG0005679	OG0002483Hg_chrom1_MM26_7846	OG0002483Hg_chrom1_OP50_3755	OG0002483Hg_chrom1_PA3_4655	OG0002483Hg_chrom1_TN20_4040	OG0002483Hg_chrom1_TN22_4584	OG0002483Hg_chrom1_TN7_4430	OG0002483Hg_chrom1_TN8_4487	OG0002483Hg_chrom2_TN10_3656	OG0002483chr4X12_19134
OG0005680	OG0012888Hg_chrom1_MM26_7848	OG0012888Hg_chrom1_OP50_3758	OG0012888Hg_chrom1_PA3_4658	OG0012888Hg_chrom1_TN20_4041	OG0012888Hg_chrom1_TN22_4589	OG0012888Hg_chrom1_TN7_4435	OG0012888Hg_chrom1_TN8_4490	OG0012888Hg_chrom2_TN10_3662	OG0012888chr4X12_19130
OG0005681	OG0005070Hg_chrom1_MM26_7849	OG0005070Hg_chrom1_PA3_4659	OG0005070Hg_chrom1_TN8_4492	OG0005070Hg_chrom2_TN10_3663	OG0016562Hg_chrom1_OP50_3759	OG0016562Hg_chrom1_TN20_4044	OG0016562Hg_chrom1_TN22_459	OG0016562Hg_chrom1_TN7_4437	OG0016562chr4X12_19126
OG0005682	OG0006584Hg_chrom1_MM26_7853	OG0006584Hg_chrom1_OP50_3762	OG0006584Hg_chrom1_PA3_4663	OG0006584Hg_chrom1_TN20_4047	OG0006584Hg_chrom1_TN22_4592	OG0006584Hg_chrom1_TN7_4440	OG0006584Hg_chrom1_TN8_4495	OG0006584Hg_chrom2_TN10_3669	OG0006584chr4X12_19124
OG0005683	Hg_chrom1_OP50_3764	OG0014481Hg_chrom1_MM26_7856	OG0014481Hg_chrom1_PA3_4665	OG0014481Hg_chrom1_TN20_4048	OG0014481Hg_chrom1_TN22_4594	OG0014481Hg_chrom1_TN7_4442	OG0014481Hg_chrom1_TN8_4498	OG0014481Hg_chrom2_TN10_3670	OG0014481chr4X12_19120
OG0005684	OG0011575Hg_chrom1_MM26_7878	OG0011575Hg_chrom1_OP50_3778	OG0011575Hg_chrom1_PA3_4687	OG0011575Hg_chrom1_TN20_4067	OG0011575Hg_chrom1_TN22_4557	OG0011575Hg_chrom1_TN7_4460	OG0011575Hg_chrom1_TN8_4517	OG0011575Hg_chrom2_TN10_3684	OG0011575chr4X12_19101
OG0005687	OG0011578Hg_chrom1_MM26_8053	OG0011578Hg_chrom1_OP50_3880	OG0011578Hg_chrom1_PA3_4838	OG0011578Hg_chrom1_TN20_4197	OG0011578Hg_chrom1_TN22_472	OG0011578Hg_chrom1_TN7_4598	OG0011578Hg_chrom1_TN8_4645	OG0011578Hg_chrom2_TN10_3600	OG0011578chr4X12_18972
OG0005688	Hg_chrom1_PA3_4839	OG0008468Hg_chrom1_MM26_8054	OG0008468Hg_chrom1_OP50_3881	OG0008468Hg_chrom1_TN20_4199	OG0008468Hg_chrom1_TN22_4720	OG0008468Hg_chrom1_TN8_4647	OG0008468Hg_chrom2_TN10_36	OG0008468chr4X12_18969	OG0023784Hg_chrom1_TN7_460
OG0005689	OG0019463Hg_chrom1_MM26_8063	OG0019463Hg_chrom1_OP50_3886	OG0019463Hg_chrom1_PA3_4847	OG0019463Hg_chrom1_TN20_4205	OG0019463Hg_chrom1_TN22_4728	OG0019463Hg_chrom1_TN8_4652	OG0019463Hg_chrom2_TN10_3595	OG0019463chr4X12_18963	OG0019464Hg_chrom1_TN7_4610
OG0005691	OG0007501Hg_chrom1_MM26_8090	OG0007501Hg_chrom1_OP50_3919	OG0007501Hg_chrom1_TN20_4226	OG0007501Hg_chrom1_TN8_4688	OG0007501Hg_chrom2_TN10_3561	OG0007501chr4X12_18932	OG0019466Hg_chrom1_PA3_4877	OG0019466Hg_chrom1_TN22_4758	OG0019466Hg_chrom1_TN7_4634
OG0005692	OG0005074Hg_chrom1_MM26_8094	OG0005074Hg_chrom1_OP50_3922	OG0005074Hg_chrom1_PA3_4881	OG0005074Hg_chrom1_TN20_4228	OG0005074Hg_chrom1_TN22_4762	OG0005074Hg_chrom1_TN7_464	OG0005074Hg_chrom1_TN8_4691	OG0005074Hg_chrom2_TN10_3559	OG0005074chr4X12_18930
OG0005693	OG0014486Hg_chrom1_MM26_8119	OG0014486Hg_chrom1_OP50_394	OG0014486Hg_chrom1_PA3_4904	OG0014486Hg_chrom1_TN20_4246	OG0014486Hg_chrom1_TN22_4787	OG0014486Hg_chrom1_TN7_4664	OG0014486Hg_chrom1_TN8_4706	OG0014486Hg_chrom2_TN10_3530	OG0014486chr4X12_18913
OG0005694	Hg_chrom2_TN10_3529	OG0002207Hg_chrom1_MM26_8122	OG0002207Hg_chrom1_OP50_3944	OG0002207Hg_chrom1_PA3_4909	OG0002207Hg_chrom1_TN20_4250	OG0002207Hg_chrom1_TN22_4792	OG0002207Hg_chrom1_TN7_4668	OG0002207Hg_chrom1_TN8_4709	OG0002207chr4X12_18907
OG0005695	OG0002486Hg_chrom1_MM26_8133	OG0002486Hg_chrom1_OP50_3950	OG0002486Hg_chrom1_PA3_4919	OG0002486Hg_chrom1_TN20_4256	OG0002486Hg_chrom1_TN22_4797	OG0002486Hg_chrom1_TN7_4677	OG0002486Hg_chrom1_TN8_4714	OG0002486Hg_chrom2_TN10_3521	OG0002486chr4X12_18901
OG0005696	Hg_chrom1_TN7_4690	OG0010455Hg_chrom1_MM26_8148	OG0010455Hg_chrom1_OP50_3958	OG0010455Hg_chrom1_PA3_4932	OG0010455Hg_chrom1_TN20_427	OG0010455Hg_chrom1_TN22_4808	OG0010455Hg_chrom1_TN8_4737	OG0010455Hg_chrom2_TN10_3503	OG0010455chr4X12_18879
OG0005698	OG0011583Hg_chrom1_MM26_8274	OG0011583Hg_chrom1_OP50_4060	OG0011583Hg_chrom1_PA3_5040	OG0011583Hg_chrom1_TN20_4374	OG0011583Hg_chrom1_TN22_4927	OG0011583Hg_chrom1_TN7_4795	OG0011583Hg_chrom1_TN8_4851	OG0011583Hg_chrom2_TN10_3426	OG0011583chr4X12_18769
OG0005702	OG0008477Hg_chrom1_PA3_5162	OG0008477Hg_chrom1_TN7_4908	OG0008477chr4X12_18681	OG0014499Hg_chrom1_MM26_8386	OG0014499Hg_chrom1_OP50_4146	OG0014499Hg_chrom1_TN20_4515	OG0014499Hg_chrom1_TN22_5014	OG0014499Hg_chrom1_TN8_495	OG0014499Hg_chrom2_TN10_3357
OG0005703	OG0002796Hg_chrom1_MM26_8390	OG0002796Hg_chrom1_OP50_4149	OG0002796Hg_chrom1_PA3_5155	OG0002796Hg_chrom1_TN20_4509	OG0002796Hg_chrom1_TN22_5017	OG0002796Hg_chrom1_TN7_4915	OG0002796Hg_chrom1_TN8_4954	OG0002796Hg_chrom2_TN10_3352	OG0002796chr4X12_18676
OG0005704	OG0016574Hg_chrom1_MM26_8403	OG0016574Hg_chrom1_OP50_4164	OG0016574Hg_chrom1_PA3_5139	OG0016574Hg_chrom1_TN20_449	OG0016574Hg_chrom1_TN22_5067	OG0016574Hg_chrom1_TN7_4934	OG0016574Hg_chrom1_TN8_4968	OG0016574Hg_chrom2_TN10_3340	chr4X12_18658
OG0005706	OG0009414Hg_chrom1_MM26_8526	OG0009414Hg_chrom1_OP50_4267	OG0009414Hg_chrom1_PA3_5330	OG0009414Hg_chrom1_TN20_4601	OG0009414Hg_chrom1_TN22_5184	OG0009414Hg_chrom1_TN7_5088	OG0009414Hg_chrom1_TN8_5075	OG0009414Hg_chrom2_TN10_3198	OG0009414chr4X12_18544
OG0005707	OG0006590Hg_chrom1_MM26_8528	OG0006590Hg_chrom1_OP50_4270	OG0006590Hg_chrom1_PA3_5332	OG0006590Hg_chrom1_TN20_4602	OG0006590Hg_chrom1_TN22_5186	OG0006590Hg_chrom1_TN7_5090	OG0006590Hg_chrom1_TN8_5077	OG0006590Hg_chrom2_TN10_3194	chr4X12_18539
OG0005708	OG0002798Hg_chrom1_MM26_8546	OG0002798Hg_chrom1_PA3_5349	OG0002798Hg_chrom1_TN20_4619	OG0002798Hg_chrom1_TN22_5212	OG0002798Hg_chrom1_TN7_5105	OG0002798Hg_chrom1_TN8_5105	OG0002798Hg_chrom2_TN10_3170	OG0002798chr4X12_18519	OG0003069Hg_chrom1_OP50_4296
OG0005709	OG0000805Hg_chrom1_MM26_8566	OG0000805Hg_chrom1_OP50_4310	OG0000805Hg_chrom1_PA3_5368	OG0000805Hg_chrom1_TN20_4630	OG0000805Hg_chrom1_TN22_5232	OG0000805Hg_chrom1_TN7_5121	OG0000805Hg_chrom1_TN8_5124	OG0000805Hg_chrom2_TN10_3156	OG0000805chr4X12_18504
OG0005712	OG0003515Hg_chrom1_MM26_8627	OG0003515Hg_chrom1_OP50_4373	OG0003515Hg_chrom1_PA3_5515	OG0003515Hg_chrom1_TN20_4684	OG0003515Hg_chrom1_TN22_5288	OG0003515Hg_chrom1_TN7_5184	OG0003515Hg_chrom1_TN8_5189	OG0003515Hg_chrom2_TN10_3085	OG0003515chr4X12_18274
OG0005714	OG0005083Hg_chrom1_OP50_4367	OG0005083Hg_chrom1_PA3_5503	OG0005083Hg_chrom1_TN20_4679	OG0005083Hg_chrom1_TN7_5172	OG0005083Hg_chrom1_TN8_5174	OG0005083chr4X12_18263	OG0029294Hg_chrom1_MM26_8638	OG0040958Hg_chrom1_TN22_5280	OG0040958Hg_chrom2_TN10_3094
OG0005715	OG0016584Hg_chrom1_MM26_8642	OG0016584Hg_chrom1_OP50_4366	OG0016584Hg_chrom1_PA3_5502	OG0016584Hg_chrom1_TN20_4678	OG0016584Hg_chrom1_TN22_5278	OG0016584Hg_chrom1_TN7_5171	OG0016584Hg_chrom1_TN8_5172	OG0016584Hg_chrom2_TN10_3096	OG0016584chr4X12_18262
OG0005716	OG0001008Hg_chrom1_OP50_436	OG0001008Hg_chrom1_PA3_5497	OG0001008Hg_chrom1_TN20_4671	OG0001008Hg_chrom1_TN7_5160	OG0001008Hg_chrom1_TN8_5165	OG0001008chr4X12_18248	OG0010466Hg_chrom1_TN22_5268	OG0016587Hg_chrom1_MM26_8649	OG0016587Hg_chrom2_TN10_3100
OG0005717	OG0006592Hg_chrom1_MM26_8658	OG0006592Hg_chrom1_OP50_4355	OG0006592Hg_chrom1_PA3_5490	OG0006592Hg_chrom1_TN20_4665	OG0006592Hg_chrom1_TN22_5266	OG0006592Hg_chrom1_TN7_5156	OG0006592Hg_chrom1_TN8_5160	OG0006592Hg_chrom2_TN10_3113	OG0006592chr4X12_18243
OG0005718	Hg_chrom1_MM26_8683	OG0007509Hg_chrom1_OP50_4392	OG0007509Hg_chrom1_PA3_5542	OG0007509Hg_chrom1_TN20_4710	OG0007509Hg_chrom1_TN22_5315	OG0007509Hg_chrom1_TN7_5222	OG0007509Hg_chrom1_TN8_5216	OG0007509Hg_chrom2_TN10_3043	OG0007509chr4X12_18311
OG0005725	OG0008484Hg_chrom1_MM26_9030	OG0008484Hg_chrom1_OP50_4611	OG0008484Hg_chrom1_PA3_5806	OG0008484Hg_chrom1_TN20_4965	OG0008484Hg_chrom1_TN22_5614	OG0008484Hg_chrom1_TN7_5514	OG0008484Hg_chrom1_TN8_5530	OG0008484Hg_chrom2_TN10_2732	OG0008484chr4X12_17942
OG0005726	Hg_chrom2_TN10_2730	OG0016594Hg_chrom1_MM26_9033	OG0016594Hg_chrom1_OP50_4612	OG0016594Hg_chrom1_PA3_5807	OG0016594Hg_chrom1_TN20_4967	OG0016594Hg_chrom1_TN22_5616	OG0016594Hg_chrom1_TN7_5515	OG0016594Hg_chrom1_TN8_5531	OG0016594chr4X12_17941
OG0005727	OG0000036Hg_chrom1_MM26_9039	OG0000036Hg_chrom1_OP50_4613	OG0000036Hg_chrom1_PA3_5813	OG0000036Hg_chrom1_TN20_4968	OG0000036Hg_chrom1_TN22_5619	OG0000036Hg_chrom1_TN7_552	OG0000036Hg_chrom1_TN8_5535	OG0000036Hg_chrom2_TN10_2725	OG0000036chr4X12_17936
OG0005728	OG0003125Hg_chrom1_OP50_4621	OG0003125Hg_chrom1_PA3_5821	OG0003125Hg_chrom1_TN20_4970	OG0003125Hg_chrom1_TN7_5530	OG0003125Hg_chrom2_TN10_2724	OG0003125chr4X12_17926	OG0026768Hg_chrom1_MM26_9043	OG0026768Hg_chrom1_TN22_5627	OG0026768Hg_chrom1_TN8_5540
OG0005729	OG0003862Hg_chrom1_MM26_9115	OG0003862Hg_chrom1_OP50_4669	OG0003862Hg_chrom1_PA3_5897	OG0003862Hg_chrom1_TN20_5038	OG0003862Hg_chrom1_TN22_5755	OG0003862Hg_chrom1_TN7_5603	OG0003862Hg_chrom1_TN8_5589	OG0003862Hg_chrom2_TN10_2637	OG0003862chr4X12_17863
OG0005731	OG0007523Hg_chrom1_PA3_6138	OG0010476Hg_chrom1_MM26_9149	OG0010476Hg_chrom1_OP50_4686	OG0010476Hg_chrom1_TN20_5073	OG0010476Hg_chrom1_TN7_5631	OG0010476Hg_chrom1_TN8_5614	OG0010476chr4X12_17815	OG0019193Hg_chrom1_TN22_578	OG0019193Hg_chrom2_TN10_2607
OG0005732	OG0016601Hg_chrom1_MM26_9151	OG0016601Hg_chrom1_OP50_4687	OG0016601Hg_chrom1_PA3_5934	OG0016601Hg_chrom1_TN20_5075	OG0016601Hg_chrom1_TN22_5780	OG0016601Hg_chrom1_TN7_5634	OG0016601Hg_chrom1_TN8_5617	OG0016601Hg_chrom2_TN10_2604	OG0016601chr4X12_17814
OG0005733	OG0014517Hg_chrom1_MM26_9154	OG0014517Hg_chrom1_OP50_4689	OG0014517Hg_chrom1_PA3_5937	OG0014517Hg_chrom1_TN20_5077	OG0014517Hg_chrom1_TN22_5783	OG0014517Hg_chrom1_TN7_5637	OG0014517Hg_chrom1_TN8_562	OG0014517Hg_chrom2_TN10_2600	OG0014517chr4X12_17810
OG0005734	OG0012923Hg_chrom1_MM26_9156	OG0012923Hg_chrom1_OP50_4690	OG0012923Hg_chrom1_PA3_5938	OG0012923Hg_chrom1_TN20_5079	OG0012923Hg_chrom1_TN22_5785	OG0012923Hg_chrom1_TN7_5639	OG0012923Hg_chrom1_TN8_5620	OG0012923Hg_chrom2_TN10_26	OG0012923chr4X12_17807
OG0005735	OG0016605Hg_chrom1_PA3_5955	OG0016605Hg_chrom1_TN22_581	OG0016605Hg_chrom1_TN7_5653	OG0016605Hg_chrom1_TN8_5637	OG0016605chr4X12_17788	OG0022236Hg_chrom1_MM26_9172	OG0023788Hg_chrom1_OP50_4701	OG0023788Hg_chrom2_TN10_2566	OG0030656Hg_chrom1_TN20_5091
OG0005736	OG0012924Hg_chrom1_MM26_9192	OG0012924Hg_chrom1_PA3_5970	OG0012924Hg_chrom1_TN7_5674	OG0012924Hg_chrom1_TN8_5650	OG0012924Hg_chrom2_TN10_2547	OG0012924chr4X12_17777	OG0026773Hg_chrom1_OP50_4712	OG0026773Hg_chrom1_TN20_5101	OG0026773Hg_chrom1_TN22_5722
OG0005737	OG0014518Hg_chrom1_TN22_5856	OG0014518Hg_chrom2_TN10_2496	OG0016607Hg_chrom1_MM26_9209	OG0016607Hg_chrom1_OP50_4733	OG0016607Hg_chrom1_PA3_6010	OG0016607Hg_chrom1_TN20_5128	OG0016607Hg_chrom1_TN7_5704	OG0016607Hg_chrom1_TN8_5685	OG0016607chr2X12_9439
OG0005738	OG0001393Hg_chrom1_MM26_9213	OG0001393Hg_chrom1_OP50_4735	OG0001393Hg_chrom1_PA3_6013	OG0001393Hg_chrom1_TN20_513	OG0001393Hg_chrom1_TN22_5859	OG0001393Hg_chrom1_TN7_5708	OG0001393Hg_chrom1_TN8_5689	OG0001393Hg_chrom2_TN10_249	OG0001393chr2X12_9440
OG0005739	OG0016608Hg_chrom1_MM26_9215	OG0016608Hg_chrom1_OP50_474	OG0016608Hg_chrom1_PA3_6015	OG0016608Hg_chrom1_TN20_5132	OG0016608Hg_chrom1_TN22_5860	OG0016608Hg_chrom1_TN7_571	OG0016608Hg_chrom1_TN8_5691	OG0016608Hg_chrom2_TN10_2487	OG0016608chr2X12_9444
OG0005740	OG0006604Hg_chrom1_MM26_9217	OG0006604Hg_chrom1_OP50_4741	OG0006604Hg_chrom1_PA3_6017	OG0006604Hg_chrom1_TN20_5134	OG0006604Hg_chrom1_TN22_5863	OG0006604Hg_chrom1_TN7_5712	OG0006604Hg_chrom1_TN8_5694	OG0006604Hg_chrom2_TN10_2485	OG0006604chr2X12_9447
OG0005741	OG0012925Hg_chrom1_MM26_9219	OG0012925Hg_chrom1_OP50_4744	OG0012925Hg_chrom1_PA3_6019	OG0012925Hg_chrom1_TN20_5137	OG0012925Hg_chrom1_TN22_5865	OG0012925Hg_chrom1_TN7_5715	OG0012925Hg_chrom1_TN8_5696	OG0012925Hg_chrom2_TN10_2483	OG0012925chr2X12_9450
OG0005742	Hg_chrom1_TN22_5903	OG0014519Hg_chrom1_MM26_9256	OG0014519Hg_chrom1_OP50_4786	OG0014519Hg_chrom1_PA3_6060	OG0014519Hg_chrom1_TN20_5158	OG0014519Hg_chrom1_TN7_5761	OG0014519Hg_chrom1_TN8_5739	OG0014519Hg_chrom2_TN10_2451	OG0014519chr2X12_9495
OG0005744	OG0011602Hg_chrom1_OP50_484	OG0011602Hg_chrom1_TN22_5917	OG0016611Hg_chrom1_MM26_9267	OG0016611Hg_chrom1_PA3_6066	OG0016611Hg_chrom1_TN20_5165	OG0016611Hg_chrom1_TN7_5766	OG0016611Hg_chrom1_TN8_5752	OG0016611Hg_chrom2_TN10_2425	OG0016611chr2X12_9510
OG0005747	OG0009434Hg_chrom1_MM26_9434	OG0009434Hg_chrom1_OP50_564	OG0009434Hg_chrom1_PA3_6191	OG0009434Hg_chrom1_TN20_584	OG0009434Hg_chrom1_TN22_6041	OG0009434Hg_chrom1_TN7_5868	OG0009434Hg_chrom1_TN8_5856	OG0009434Hg_chrom2_TN10_2322	OG0009434chr4X12_17659
OG0005748	OG0000470Hg_chrom1_MM26_9458	OG0000470Hg_chrom1_OP50_581	OG0000470Hg_chrom1_PA3_6208	OG0000470Hg_chrom1_TN20_601	OG0000470Hg_chrom1_TN22_6054	OG0000470Hg_chrom1_TN7_589	OG0000470Hg_chrom1_TN8_589	OG0000470Hg_chrom2_TN10_2296	OG0000470chr4X12_17637
OG0005750	OG0014528Hg_chrom1_MM26_9515	OG0014528Hg_chrom1_OP50_624	OG0014528Hg_chrom1_PA3_6273	OG0014528Hg_chrom1_TN20_648	OG0014528Hg_chrom1_TN22_6105	OG0014528Hg_chrom1_TN7_5934	OG0014528Hg_chrom1_TN8_5943	OG0014528Hg_chrom2_TN10_2234	OG0014528chr4X12_17472
OG0005751	OG0000142Hg_chrom1_MM26_9518	OG0000142Hg_chrom1_OP50_627	OG0000142Hg_chrom1_PA3_6278	OG0000142Hg_chrom1_TN20_650	OG0000142Hg_chrom1_TN22_611	OG0000142Hg_chrom1_TN7_5938	OG0000142Hg_chrom1_TN8_595	OG0000142Hg_chrom2_TN10_223	OG0000142chr4X12_17478
OG0005752	OG0014529Hg_chrom1_MM26_9562	OG0014529Hg_chrom1_OP50_648	OG0014529Hg_chrom1_PA3_6315	OG0014529Hg_chrom1_TN20_682	OG0014529Hg_chrom1_TN22_937	OG0014529Hg_chrom1_TN7_611	OG0014529Hg_chrom1_TN8_637	OG0014529Hg_chrom2_TN10_2174	OG0014529chr4X12_17519
OG0005753	OG0005827Hg_chrom1_MM26_9563	OG0005827Hg_chrom1_OP50_649	OG0005827Hg_chrom1_PA3_6316	OG0005827Hg_chrom1_TN20_684	OG0005827Hg_chrom1_TN22_936	OG0005827Hg_chrom1_TN7_612	OG0005827Hg_chrom1_TN8_638	OG0005827Hg_chrom2_TN10_2170	OG0005827chr4X12_17521
OG0005754	OG0002497Hg_chrom1_MM26_9566	OG0002497Hg_chrom1_OP50_653	OG0002497Hg_chrom1_PA3_6320	OG0002497Hg_chrom1_TN20_686	OG0002497Hg_chrom1_TN22_932	OG0002497Hg_chrom1_TN7_617	OG0002497Hg_chrom1_TN8_642	OG0002497Hg_chrom2_TN10_2168	OG0002497chr4X12_17526
OG0005755	OG0008496Hg_chrom1_MM26_9570	OG0021650Hg_chrom1_OP50_659	OG0021650Hg_chrom1_PA3_6325	OG0021650Hg_chrom1_TN20_693	OG0021650Hg_chrom1_TN22_925	OG0021650Hg_chrom1_TN7_622	OG0021650Hg_chrom1_TN8_648	OG0021650Hg_chrom2_TN10_216	OG0021650chr4X12_17530
OG0005756	OG0005828Hg_chrom1_MM26_9572	OG0005828Hg_chrom1_OP50_663	OG0005828Hg_chrom1_PA3_6330	OG0005828Hg_chrom1_TN20_697	OG0005828Hg_chrom1_TN22_923	OG0005828Hg_chrom1_TN7_625	OG0005828Hg_chrom1_TN8_650	OG0005828Hg_chrom2_TN10_2159	OG0005828chr4X12_17533
OG0005757	OG0000582Hg_chrom1_MM26_9576	OG0000582Hg_chrom1_TN20_701	OG0000582Hg_chrom2_TN10_2150	OG0000582chr4X12_17542	OG0016130Hg_chrom1_OP50_669	OG0016130Hg_chrom1_PA3_6336	OG0016130Hg_chrom1_TN22_915	OG0016130Hg_chrom1_TN7_631	OG0016130Hg_chrom1_TN8_657
OG0005759	OG0012935Hg_chrom1_OP50_714	OG0016619Hg_chrom1_MM26_9610	OG0016619Hg_chrom1_PA3_6386	OG0016619Hg_chrom1_TN20_744	OG0016619Hg_chrom1_TN22_860	OG0016619Hg_chrom1_TN7_683	OG0016619Hg_chrom1_TN8_702	OG0016619Hg_chrom2_TN10_210	OG0016619chr4X12_17599
OG0005760	OG0002217Hg_chrom1_MM26_9616	OG0002217Hg_chrom1_OP50_703	OG0002217Hg_chrom1_PA3_6374	OG0002217Hg_chrom1_TN20_736	OG0002217Hg_chrom1_TN22_871	OG0002217Hg_chrom1_TN7_672	OG0002217Hg_chrom1_TN8_694	OG0002217Hg_chrom2_TN10_2112	OG0002217chr4X12_17586
OG0005761	OG0016621Hg_chrom1_MM26_9620	OG0016621Hg_chrom1_OP50_701	OG0016621Hg_chrom1_PA3_6371	OG0016621Hg_chrom1_TN20_734	OG0016621Hg_chrom1_TN22_874	OG0016621Hg_chrom1_TN7_671	OG0016621Hg_chrom1_TN8_692	OG0016621Hg_chrom2_TN10_2118	OG0016621chr4X12_17583
OG0005762	Hg_chrom1_TN7_669	OG0005829Hg_chrom1_MM26_9624	OG0005829Hg_chrom1_OP50_699	OG0005829Hg_chrom1_TN20_732	OG0005829Hg_chrom1_TN22_878	OG0005829chr4X12_17580	OG0028378Hg_chrom1_PA3_6369	OG0028378Hg_chrom1_TN8_69	OG0028378Hg_chrom2_TN10_2121
OG0005763	OG0003956Hg_chrom1_MM26_9626	OG0003956Hg_chrom1_OP50_698	OG0003956Hg_chrom1_TN22_881	OG0003956Hg_chrom1_TN8_685	OG0003956Hg_chrom2_TN10_2125	OG0003956chr4X12_17577	OG0010481Hg_chrom1_PA3_6364	OG0010481Hg_chrom1_TN20_730	OG0010481Hg_chrom1_TN7_663
OG0005764	OG0005093Hg_chrom1_MM26_9645	OG0005093Hg_chrom1_OP50_729	OG0005093Hg_chrom1_PA3_6408	OG0005093Hg_chrom1_TN20_757	OG0005093Hg_chrom1_TN22_840	OG0005093Hg_chrom1_TN7_710	OG0005093Hg_chrom1_TN8_726	OG0005093Hg_chrom2_TN10_2078	OG0005093chr4X12_17625
OG0005765	OG0009436Hg_chrom1_MM26_9656	OG0009436Hg_chrom1_OP50_736	OG0009436Hg_chrom1_TN20_767	OG0009436Hg_chrom1_TN7_723	OG0009436Hg_chrom1_TN8_737	OG0009436Hg_chrom2_TN10_1821	OG0009436chr4X12_17635	OG0024079Hg_chrom1_PA3_6419	OG0024079Hg_chrom1_TN22_825
OG0005769	OG0002499Hg_chrom1_MM26_9714	OG0002499Hg_chrom1_OP50_794	OG0002499Hg_chrom1_PA3_6478	OG0002499Hg_chrom1_TN20_815	OG0002499Hg_chrom1_TN22_775	OG0002499Hg_chrom1_TN7_781	OG0002499Hg_chrom1_TN8_787	OG0002499Hg_chrom2_TN10_1810	OG0002499chr4X12_17400
OG0005770	OG0008500Hg_Un_13_OP50_27	OG0008500Hg_chrom1_MM26_9736	OG0008500Hg_chrom1_PA3_6496	OG0008500Hg_chrom1_TN20_829	OG0008500Hg_chrom1_TN22_761	OG0008500Hg_chrom1_TN7_800	OG0008500Hg_chrom1_TN8_809	OG0008500Hg_chrom2_TN10_1870	OG0008500chr4X12_17393
OG0005771	OG0011612Hg_chrom1_MM26_9740	OG0011612Hg_chrom1_OP50_815	OG0011612Hg_chrom1_PA3_6502	OG0011612Hg_chrom1_TN20_833	OG0011612Hg_chrom1_TN22_756	OG0011612Hg_chrom1_TN7_805	OG0011612Hg_chrom1_TN8_813	OG0011612Hg_chrom2_TN10_1874	OG0011612chr4X12_17386
OG0005772	OG0008501Hg_chrom1_MM26_9741	OG0008501Hg_chrom1_OP50_816	OG0008501Hg_chrom1_PA3_6503	OG0008501Hg_chrom1_TN20_837	OG0008501Hg_chrom1_TN7_806	OG0008501Hg_chrom2_TN10_1875	OG0008501chr4X12_17384	OG0042560Hg_chrom1_TN22_754	OG0042560Hg_chrom1_TN8_815
OG0005776	OG0000339Hg_chrom1_MM26_9834	OG0000339Hg_chrom1_OP50_897	OG0000339Hg_chrom1_PA3_6591	OG0000339Hg_chrom1_TN20_908	OG0000339Hg_chrom1_TN22_668	OG0000339Hg_chrom1_TN7_891	OG0000339Hg_chrom1_TN8_899	OG0000339Hg_chrom2_TN10_1957	OG0000339chr4X12_17314
OG0005777	OG0003959Hg_chrom1_MM26_9837	OG0003959Hg_chrom1_OP50_903	OG0003959Hg_chrom1_PA3_6597	OG0003959Hg_chrom1_TN22_662	OG0003959Hg_chrom1_TN7_898	OG0003959Hg_chrom1_TN8_905	OG0003959Hg_chrom2_TN10_1966	OG0003959chr4X12_17309	OG0014544Hg_chrom1_TN20_911
OG0005778	OG0012941Hg_chrom1_OP50_904	OG0012941Hg_chrom1_TN7_902	OG0012941Hg_chrom2_TN10_197	OG0012941chr4X12_17305	OG0016632Hg_chrom1_MM26_9839	OG0016632Hg_chrom1_PA3_6600	OG0016632Hg_chrom1_TN20_914	OG0016632Hg_chrom1_TN22_657	OG0016632Hg_chrom1_TN8_907
OG0005779	OG0010486Hg_chrom1_MM26_9841	OG0010486Hg_chrom1_OP50_906	OG0010486Hg_chrom1_PA3_6602	OG0010486Hg_chrom1_TN20_916	OG0010486Hg_chrom1_TN22_656	OG0010486Hg_chrom1_TN7_904	OG0010486Hg_chrom1_TN8_91	OG0010486Hg_chrom2_TN10_1972	OG0010486chr4X12_17303
OG0005780	Hg_chrom1_MM26_9844	Hg_chrom1_PA3_6605	OG0012942Hg_chrom1_OP50_908	OG0012942Hg_chrom1_TN20_917	OG0012942Hg_chrom1_TN22_654	OG0012942Hg_chrom1_TN7_906	OG0012942Hg_chrom1_TN8_912	OG0012942Hg_chrom2_TN10_1974	OG0012942chr4X12_17301
OG0005781	OG0016633Hg_chrom1_MM26_9845	OG0016633Hg_chrom1_OP50_909	OG0016633Hg_chrom1_TN20_919	OG0016633Hg_chrom1_TN7_907	OG0016633Hg_chrom1_TN8_913	OG0016633Hg_chrom2_TN10_1975	OG0016633chr4X12_17299	OG0016634Hg_chrom1_PA3_6606	OG0016634Hg_chrom1_TN22_650
OG0005782	OG0014545Hg_chrom1_MM26_9856	OG0014545Hg_chrom1_PA3_6614	OG0014545Hg_chrom1_TN20_927	OG0014545Hg_chrom1_TN22_642	OG0014545Hg_chrom1_TN7_918	OG0014545Hg_chrom2_TN10_1981	OG0014545chr4X12_17290	OG0038857Hg_chrom1_OP50_922	OG0038857Hg_chrom1_TN8_923
OG0005783	OG0000583Hg_chrom1_OP50_940	OG0000583Hg_chrom1_PA3_6628	OG0000583Hg_chrom1_TN20_942	OG0000583Hg_chrom2_TN10_1993	OG0008504Hg_chrom1_MM26_9876	OG0008504Hg_chrom1_TN22_635	OG0008504Hg_chrom1_TN7_941	OG0008504Hg_chrom1_TN8_941	OG0008504chr4X12_17272
OG0005784	OG0016638Hg_chrom1_OP50_949	OG0016638Hg_chrom1_TN20_951	OG0016638Hg_chrom1_TN22_630	OG0016638Hg_chrom1_TN7_948	OG0016638Hg_chrom1_TN8_948	OG0022257Hg_chrom1_MM26_9883	OG0022257Hg_chrom1_PA3_6642	OG0022257Hg_chrom2_TN10_2003	OG0022257chr4X12_17264
OG0005785	OG0002500Hg_chrom1_MM26_9884	OG0002500Hg_chrom1_OP50_951	OG0002500Hg_chrom1_PA3_6645	OG0002500Hg_chrom1_TN20_954	OG0002500Hg_chrom1_TN22_628	OG0002500Hg_chrom1_TN7_950	OG0002500Hg_chrom1_TN8_95	OG0002500Hg_chrom2_TN10_2007	OG0002500chr4X12_17260
OG0005786	OG0003960Hg_chrom1_MM26_9886	OG0003960Hg_chrom1_OP50_953	OG0003960Hg_chrom1_PA3_6647	OG0003960Hg_chrom1_TN20_957	OG0003960Hg_chrom1_TN22_624	OG0003960Hg_chrom1_TN7_955	OG0003960Hg_chrom1_TN8_952	OG0003960Hg_chrom2_TN10_2008	OG0003960chr4X12_17259
OG0005787	OG0002501Hg_chrom1_TN20_964	OG0011617Hg_chrom1_MM26_9891	OG0011617Hg_chrom1_OP50_959	OG0011617Hg_chrom1_TN22_618	OG0011617Hg_chrom1_TN7_956	OG0011617Hg_chrom1_TN8_957	OG0011617Hg_chrom2_TN10_2010	OG0028379Hg_chrom1_PA3_6654	OG0028379chr4X12_17253
OG0005799	OG0008512Hg_chrom2_MM26_10201	OG0008512Hg_chrom2_OP50_5110	OG0008512Hg_chrom2_PA3_10143	OG0008512Hg_chrom2_TN20_10378	OG0008512Hg_chrom2_TN22_10421	OG0008512Hg_chrom2_TN7_10433	OG0008512Hg_chrom2_TN8_10362	OG0008512chr9X12_47708	OG0014146Hg_chrom2_TN10_1369
OG0005800	OG0016646Hg_chrom2_TN20_10375	OG0016646Hg_chrom2_TN8_10359	OG0016646chr9X12_47712	OG0019520Hg_chrom2_MM26_10205	OG0019520Hg_chrom2_OP50_5109	OG0019520Hg_chrom2_PA3_10140	OG0019520Hg_chrom2_TN10_1372	OG0019520Hg_chrom2_TN22_10418	OG0019520Hg_chrom2_TN7_10431
OG0005801	OG0004501Hg_chrom2_MM26_10207	OG0004501Hg_chrom2_OP50_5106	OG0004501Hg_chrom2_PA3_10138	OG0004501Hg_chrom2_TN10_1374	OG0004501Hg_chrom2_TN20_10373	OG0004501Hg_chrom2_TN22_10415	OG0004501Hg_chrom2_TN7_10428	OG0004501Hg_chrom2_TN8_10357	OG0004501chr9X12_47717
OG0005802	OG0009446Hg_chrom2_MM26_10235	OG0009446Hg_chrom2_OP50_5082	OG0009446Hg_chrom2_PA3_10109	OG0009446Hg_chrom2_TN10_1397	OG0009446Hg_chrom2_TN20_10349	OG0009446Hg_chrom2_TN22_10388	OG0009446Hg_chrom2_TN7_10403	OG0009446Hg_chrom2_TN8_10343	OG0009446chr9X12_47766
OG0005803	OG0002219Hg_chrom2_MM26_10258	OG0002219Hg_chrom2_OP50_5074	OG0002219Hg_chrom2_PA3_10097	OG0002219Hg_chrom2_TN10_141	OG0002219Hg_chrom2_TN20_10342	OG0002219Hg_chrom2_TN22_10371	OG0002219Hg_chrom2_TN7_10382	OG0002219Hg_chrom2_TN8_10329	OG0002219chr9X12_47775
OG0005805	Hg_chrom2_TN10_1479	OG0001593Hg_chrom2_MM26_10305	OG0001593Hg_chrom2_OP50_5055	OG0001593Hg_chrom2_PA3_10069	OG0001593Hg_chrom2_TN20_10313	OG0001593Hg_chrom2_TN22_10338	OG0001593Hg_chrom2_TN7_10348	OG0001593Hg_chrom2_TN8_10298	OG0001593chr9X12_47801
OG0005807	OG0003964Hg_chrom2_MM26_10362	OG0003964Hg_chrom2_OP50_4996	OG0003964Hg_chrom2_PA3_10194	OG0003964Hg_chrom2_TN10_1528	OG0003964Hg_chrom2_TN20_10273	OG0003964Hg_chrom2_TN22_10287	OG0003964Hg_chrom2_TN7_10270	OG0003964Hg_chrom2_TN8_10217	OG0003964chr9X12_47875
OG0005808	OG0014552Hg_chrom2_MM26_10364	OG0014552Hg_chrom2_OP50_4999	OG0014552Hg_chrom2_PA3_10197	OG0014552Hg_chrom2_TN10_1530	OG0014552Hg_chrom2_TN20_10270	OG0014552Hg_chrom2_TN22_10285	OG0014552Hg_chrom2_TN7_10269	OG0014552Hg_chrom2_TN8_10215	OG0014552chr9X12_47877
OG0005811	OG0000471Hg_chrom2_MM26_10553	OG0000471Hg_chrom2_OP50_4860	OG0000471Hg_chrom2_PA3_10332	OG0000471Hg_chrom2_TN10_1710	OG0000471Hg_chrom2_TN20_10139	OG0000471Hg_chrom2_TN22_10138	OG0000471Hg_chrom2_TN7_10079	OG0000471Hg_chrom2_TN8_10065	OG0000471chr9X12_48048
OG0005812	OG0014555Hg_chrom2_MM26_10557	OG0014555Hg_chrom2_OP50_4855	OG0014555Hg_chrom2_PA3_10339	OG0014555Hg_chrom2_TN10_1719	OG0014555Hg_chrom2_TN20_10134	OG0014555Hg_chrom2_TN22_10129	OG0014555Hg_chrom2_TN7_10084	OG0014555Hg_chrom2_TN8_10056	OG0014555chr9X12_48042
OG0005813	OG0000647Hg_chrom2_MM26_10566	OG0000647Hg_chrom2_OP50_4847	OG0000647Hg_chrom2_PA3_10348	OG0000647Hg_chrom2_TN10_1726	OG0000647Hg_chrom2_TN20_10126	OG0000647Hg_chrom2_TN22_10114	OG0000647Hg_chrom2_TN7_10093	OG0000647Hg_chrom2_TN8_10042	OG0000647chr9X12_48030
OG0005814	OG0001595Hg_chrom2_MM26_10569	OG0001595Hg_chrom2_PA3_10359	OG0001595Hg_chrom2_TN20_10120	OG0001595Hg_chrom2_TN22_10108	OG0001595Hg_chrom2_TN8_10036	OG0001595chr9X12_48024	OG0005843Hg_chrom2_OP50_4844	OG0005843Hg_chrom2_TN10_1733	OG0005843Hg_chrom2_TN7_10099
OG0005815	Hg_chrom2_TN22_10100	OG0010499Hg_chrom2_MM26_10577	OG0010499Hg_chrom2_PA3_10367	OG0010499Hg_chrom2_TN10_1743	OG0010499Hg_chrom2_TN20_10115	OG0010499Hg_chrom2_TN7_10108	OG0010499chr9X12_48018	OG0038860Hg_chrom2_OP50_4835	OG0038860Hg_chrom2_TN8_10031
OG0005816	OG0016653Hg_chrom2_MM26_10583	OG0016653Hg_chrom2_OP50_4833	OG0016653Hg_chrom2_PA3_10377	OG0016653Hg_chrom2_TN10_1746	OG0016653Hg_chrom2_TN20_10114	OG0016653Hg_chrom2_TN22_10097	OG0016653Hg_chrom2_TN8_10025	OG0016653chr9X12_48013	OG0040928Hg_chrom2_TN7_10111
OG0005817	OG0000089Hg_chrom2_MM26_10585	OG0000089Hg_chrom2_OP50_4828	OG0000089Hg_chrom2_TN10_1751	OG0000089Hg_chrom2_TN20_10112	OG0000089Hg_chrom2_TN22_10095	OG0000089Hg_chrom2_TN7_10113	OG0000089Hg_chrom2_TN8_10019	OG0000089chr9X12_48008	OG0014145Hg_chrom2_PA3_10381
OG0005823	OG0007547Hg_chrom1_TN10_9977	OG0007547Hg_chrom2_MM26_10827	OG0007547Hg_chrom2_OP50_5406	OG0007547Hg_chrom2_PA3_10617	OG0007547Hg_chrom2_TN20_10688	OG0007547Hg_chrom2_TN22_10802	OG0007547Hg_chrom2_TN7_10845	OG0007547Hg_chrom2_TN8_10663	OG0007547chr9X12_47430
OG0005826	OG0000909Hg_chrom1_TN10_9831	OG0000909Hg_chrom2_MM26_10916	OG0000909Hg_chrom2_OP50_5481	OG0000909Hg_chrom2_PA3_10783	OG0000909Hg_chrom2_TN20_10757	OG0000909Hg_chrom2_TN22_10901	OG0000909Hg_chrom2_TN7_10926	OG0000909Hg_chrom2_TN8_10764	OG0000909chr9X12_47486
OG0005828	OG0004506Hg_chrom1_TN10_9791	OG0004506Hg_chrom2_MM26_10962	OG0004506Hg_chrom2_OP50_5509	OG0004506Hg_chrom2_PA3_10823	OG0004506Hg_chrom2_TN20_10792	OG0004506Hg_chrom2_TN22_10943	OG0004506Hg_chrom2_TN7_10966	OG0004506Hg_chrom2_TN8_10808	OG0004506chr9X12_47292
OG0005829	OG0007549Hg_chrom2_MM26_10972	OG0007549Hg_chrom2_OP50_5515	OG0007549Hg_chrom2_PA3_10830	OG0007549Hg_chrom2_TN20_10799	OG0007549Hg_chrom2_TN22_10976	OG0007549Hg_chrom2_TN7_10982	OG0007549Hg_chrom2_TN8_10821	OG0007549chr9X12_47274	OG0012964Hg_chrom1_TN10_9776
OG0005830	Hg_chrom2_OP50_5553	OG0016666Hg_chrom1_TN10_9747	OG0016666Hg_chrom2_PA3_10857	OG0016666Hg_chrom2_TN20_10824	OG0022286Hg_chrom2_MM26_11006	OG0022286Hg_chrom2_TN22_10995	OG0022286Hg_chrom2_TN7_11011	OG0022286Hg_chrom2_TN8_10845	OG0022286chr9X12_47247
OG0005831	OG0001987Hg_chrom1_TN10_9652	OG0001987Hg_chrom2_MM26_11109	OG0001987Hg_chrom2_OP50_5593	OG0001987Hg_chrom2_PA3_10929	OG0001987Hg_chrom2_TN20_5261	OG0001987Hg_chrom2_TN22_11063	OG0001987Hg_chrom2_TN7_11088	OG0001987Hg_chrom2_TN8_10892	OG0001987chr9X12_47157
OG0005832	OG0005848Hg_chrom1_TN10_9641	OG0005848Hg_chrom2_MM26_11122	OG0005848Hg_chrom2_OP50_5605	OG0005848Hg_chrom2_PA3_10943	OG0005848Hg_chrom2_TN20_5272	OG0005848Hg_chrom2_TN22_11074	OG0005848Hg_chrom2_TN7_11100	OG0005848Hg_chrom2_TN8_10905	OG0005848chr9X12_47147
OG0005833	OG0003140Hg_chrom2_MM26_11140	OG0003140Hg_chrom2_OP50_5616	OG0003140Hg_chrom2_PA3_10968	OG0003140Hg_chrom2_TN20_5294	OG0003140Hg_chrom2_TN7_11134	OG0003140Hg_chrom2_TN8_10923	OG0003140chr9X12_47132	OG0031634Hg_chrom1_TN10_9629	OG0031634Hg_chrom2_TN22_11098
OG0005834	OG0007554Hg_chrom1_TN10_9619	OG0007554Hg_chrom2_MM26_11143	OG0007554Hg_chrom2_OP50_5622	OG0007554Hg_chrom2_PA3_10976	OG0007554Hg_chrom2_TN20_5299	OG0007554Hg_chrom2_TN22_11104	OG0007554Hg_chrom2_TN7_11141	OG0007554Hg_chrom2_TN8_10929	OG0007554chr9X12_47126
OG0005835	OG0014575Hg_chrom2_TN20_5301	OG0016671Hg_chrom1_TN10_9615	OG0016671Hg_chrom2_MM26_11145	OG0016671Hg_chrom2_OP50_5624	OG0016671Hg_chrom2_PA3_10979	OG0016671Hg_chrom2_TN7_11144	OG0016671chr9X12_47122	OG0016672Hg_chrom2_TN22_11110	OG0016673Hg_chrom2_TN8_10935
OG0005836	OG0001598Hg_chrom2_OP50_5650	OG0001598Hg_chrom2_TN20_5336	OG0001598Hg_chrom2_TN22_11150	OG0001598Hg_chrom2_TN7_11185	OG0006632Hg_chrom1_TN10_9563	OG0006632Hg_chrom2_MM26_11192	OG0006632Hg_chrom2_PA3_11029	OG0006632Hg_chrom2_TN8_10977	OG0006632chr9X12_47073
OG0005837	OG0005849Hg_chrom1_TN10_9558	OG0005849Hg_chrom2_MM26_11201	OG0005849Hg_chrom2_OP50_5653	OG0005849Hg_chrom2_PA3_11038	OG0005849Hg_chrom2_TN20_5340	OG0005849Hg_chrom2_TN22_11156	OG0005849Hg_chrom2_TN7_11190	OG0005849Hg_chrom2_TN8_10987	OG0005849chr9X12_47068
OG0005839	OG0010512Hg_chrom2_MM26_11230	OG0010512Hg_chrom2_OP50_5682	OG0010512Hg_chrom2_PA3_11074	OG0010512Hg_chrom2_TN20_5370	OG0010512Hg_chrom2_TN22_11202	OG0010512Hg_chrom2_TN8_11019	OG0010512chr9X12_47040	OG0028388Hg_chrom1_TN10_9491	OG0028388Hg_chrom2_TN7_11228
OG0005840	OG0008519Hg_chrom1_TN10_9485	OG0008519Hg_chrom2_PA3_11078	OG0008519Hg_chrom2_TN7_11233	OG0008519Hg_chrom2_TN8_11023	OG0009475Hg_chrom2_MM26_11234	OG0009475Hg_chrom2_OP50_5685	OG0009475Hg_chrom2_TN20_5372	OG0009475Hg_chrom2_TN22_11205	OG0009475chr9X12_47036
OG0005841	OG0014578Hg_chrom1_TN10_9479	OG0014578Hg_chrom2_MM26_11237	OG0014578Hg_chrom2_OP50_5689	OG0014578Hg_chrom2_PA3_11083	OG0014578Hg_chrom2_TN20_5376	OG0014578Hg_chrom2_TN22_11211	OG0014578Hg_chrom2_TN7_11240	OG0014578Hg_chrom2_TN8_11028	OG0014578chr9X12_47029
OG0005842	OG0009476Hg_chrom2_MM26_11241	OG0009476Hg_chrom2_OP50_5694	OG0009476Hg_chrom2_PA3_11090	OG0009476Hg_chrom2_TN20_5380	OG0009476Hg_chrom2_TN22_11219	OG0009476Hg_chrom2_TN7_11247	OG0009476Hg_chrom2_TN8_11034	OG0009476chr9X12_47033	OG0026041Hg_chrom1_TN10_9482
OG0005843	OG0003974Hg_chrom1_TN10_9472	OG0003974Hg_chrom2_MM26_11252	OG0003974Hg_chrom2_OP50_5702	OG0003974Hg_chrom2_PA3_11094	OG0003974Hg_chrom2_TN20_5388	OG0003974Hg_chrom2_TN22_11221	OG0003974Hg_chrom2_TN7_11252	OG0003974Hg_chrom2_TN8_11045	OG0003974chr9X12_47022
OG0005844	OG0001399Hg_chrom1_TN10_9459	OG0001399Hg_chrom2_MM26_11265	OG0001399Hg_chrom2_OP50_5713	OG0001399Hg_chrom2_PA3_11106	OG0001399Hg_chrom2_TN20_5400	OG0001399Hg_chrom2_TN22_11230	OG0001399Hg_chrom2_TN7_11262	OG0001399Hg_chrom2_TN8_11054	OG0001399chr9X12_47020
OG0005845	OG0012972Hg_chrom1_TN10_9455	OG0012972Hg_chrom2_MM26_11268	OG0012972Hg_chrom2_OP50_5719	OG0012972Hg_chrom2_PA3_11110	OG0012972Hg_chrom2_TN20_5404	OG0012972Hg_chrom2_TN22_11236	OG0012972Hg_chrom2_TN7_11266	OG0012972Hg_chrom2_TN8_11060	OG0012972chr9X12_47016
OG0005846	OG0016681Hg_chrom1_TN10_9400	OG0016681Hg_chrom2_MM26_11309	OG0016681Hg_chrom2_OP50_5760	OG0016681Hg_chrom2_PA3_11155	OG0016681Hg_chrom2_TN20_5446	OG0016681Hg_chrom2_TN22_11289	OG0016681Hg_chrom2_TN7_11312	OG0016681Hg_chrom2_TN8_11109	OG0016681chr9X12_46981
OG0005847	OG0016682Hg_chrom1_TN10_9396	OG0016682Hg_chrom2_MM26_11310	OG0016682Hg_chrom2_OP50_5762	OG0016682Hg_chrom2_PA3_11156	OG0016682Hg_chrom2_TN20_5447	OG0016682Hg_chrom2_TN22_11290	OG0016682Hg_chrom2_TN7_11313	OG0016682Hg_chrom2_TN8_11110	OG0016682chr9X12_46979
OG0005848	OG0016684Hg_chrom1_TN10_9395	OG0016684Hg_chrom2_MM26_11313	OG0016684Hg_chrom2_OP50_5764	OG0016684Hg_chrom2_PA3_11159	OG0016684Hg_chrom2_TN20_5450	OG0016684Hg_chrom2_TN22_11293	OG0016684Hg_chrom2_TN7_11315	OG0016684Hg_chrom2_TN8_11112	OG0016684chr9X12_46978
OG0005849	OG0014580Hg_chrom1_TN10_9393	OG0014580Hg_chrom2_OP50_5768	OG0014580Hg_chrom2_PA3_11162	OG0014580Hg_chrom2_TN20_5454	OG0014580Hg_chrom2_TN22_11294	OG0014580Hg_chrom2_TN7_11316	OG0014580Hg_chrom2_TN8_11113	OG0014580chr9X12_46975	OG0032794Hg_chrom2_MM26_11315
OG0005850	OG0005851Hg_chrom1_TN10_9389	OG0005851Hg_chrom2_MM26_11320	OG0005851Hg_chrom2_OP50_5772	OG0005851Hg_chrom2_PA3_11165	OG0005851Hg_chrom2_TN20_5460	OG0005851Hg_chrom2_TN22_11296	OG0005851Hg_chrom2_TN7_11318	OG0005851Hg_chrom2_TN8_11118	OG0005851chr9X12_46971
OG0005851	OG0014581Hg_chrom1_TN10_9362	OG0014581Hg_chrom2_MM26_11332	OG0014581Hg_chrom2_OP50_5778	OG0014581Hg_chrom2_PA3_11173	OG0014581Hg_chrom2_TN20_5467	OG0014581Hg_chrom2_TN22_11303	OG0014581Hg_chrom2_TN7_11324	OG0014581Hg_chrom2_TN8_11122	OG0014581chr9X12_46950
OG0005853	OG0012975Hg_chrom1_TN10_9335	OG0012975Hg_chrom2_MM26_11360	OG0012975Hg_chrom2_OP50_5795	OG0012975Hg_chrom2_PA3_11193	OG0012975Hg_chrom2_TN20_5498	OG0012975Hg_chrom2_TN22_11331	OG0012975Hg_chrom2_TN7_11349	OG0012975Hg_chrom2_TN8_11144	OG0012975chr9X12_46931
OG0005854	OG0014584Hg_chrom1_TN10_9332	OG0014584Hg_chrom2_MM26_11361	OG0014584Hg_chrom2_OP50_5796	OG0014584Hg_chrom2_PA3_11194	OG0014584Hg_chrom2_TN20_5499	OG0014584Hg_chrom2_TN22_11332	OG0014584Hg_chrom2_TN7_11350	OG0014584Hg_chrom2_TN8_11146	OG0014584chr9X12_46929
OG0005855	Hg_chrom2_TN20_5502	OG0009478Hg_chrom1_TN10_9330	OG0009478Hg_chrom2_MM26_11362	OG0009478Hg_chrom2_OP50_5797	OG0009478Hg_chrom2_PA3_11195	OG0009478Hg_chrom2_TN22_11333	OG0009478Hg_chrom2_TN7_11351	OG0009478Hg_chrom2_TN8_11147	OG0009478chr9X12_46927
OG0005856	OG0000126Hg_chrom1_TN10_9323	OG0000126Hg_chrom2_OP50_5804	OG0000126Hg_chrom2_PA3_11207	OG0000126Hg_chrom2_TN20_5504	OG0000126Hg_chrom2_TN22_11347	OG0000126Hg_chrom2_TN7_11361	OG0000126Hg_chrom2_TN8_11160	OG0000126chr9X12_46922	OG0024538Hg_chrom2_MM26_11371
OG0005857	OG0004509Hg_chrom1_TN10_9317	OG0004509Hg_chrom2_MM26_11382	OG0004509Hg_chrom2_OP50_5812	OG0004509Hg_chrom2_PA3_11216	OG0004509Hg_chrom2_TN20_5515	OG0004509Hg_chrom2_TN22_11353	OG0004509Hg_chrom2_TN7_11371	OG0004509Hg_chrom2_TN8_11168	OG0004509chr9X12_46909
OG0005858	OG0002816Hg_chrom1_TN10_9313	OG0002816Hg_chrom2_MM26_11385	OG0002816Hg_chrom2_OP50_5816	OG0002816Hg_chrom2_PA3_11222	OG0002816Hg_chrom2_TN20_5519	OG0002816Hg_chrom2_TN22_11358	OG0002816Hg_chrom2_TN7_11379	OG0002816Hg_chrom2_TN8_11171	OG0002816chr9X12_46905
OG0005859	OG0001790Hg_chrom1_TN10_9285	OG0001790Hg_chrom2_MM26_11413	OG0001790Hg_chrom2_OP50_5843	OG0001790Hg_chrom2_PA3_11249	OG0001790Hg_chrom2_TN20_5542	OG0001790Hg_chrom2_TN22_11383	OG0001790Hg_chrom2_TN7_11402	OG0001790Hg_chrom2_TN8_11199	OG0001790chr9X12_46858
OG0005860	OG0004511Hg_chrom1_TN10_9273	OG0004511Hg_chrom2_MM26_11425	OG0004511Hg_chrom2_OP50_5849	OG0004511Hg_chrom2_PA3_11260	OG0004511Hg_chrom2_TN20_5550	OG0004511Hg_chrom2_TN22_11396	OG0004511Hg_chrom2_TN7_11412	OG0004511Hg_chrom2_TN8_11212	OG0004511chr9X12_46859
OG0005861	OG0012978Hg_chrom1_TN10_9266	OG0012978Hg_chrom2_MM26_11432	OG0012978Hg_chrom2_OP50_5854	OG0012978Hg_chrom2_PA3_11268	OG0012978Hg_chrom2_TN20_5555	OG0012978Hg_chrom2_TN22_11401	OG0012978Hg_chrom2_TN7_11419	OG0012978Hg_chrom2_TN8_11218	chr9X12_46842
OG0005862	Hg_chrom2_TN8_11227	OG0007565Hg_chrom1_TN10_9253	OG0007565Hg_chrom2_OP50_5863	OG0007565Hg_chrom2_TN20_5567	OG0007565Hg_chrom2_TN22_11416	OG0007565chr9X12_46828	OG0029384Hg_chrom2_MM26_11450	OG0029384Hg_chrom2_PA3_11288	OG0029384Hg_chrom2_TN7_11438
OG0005863	OG0016692Hg_chrom1_TN10_9252	OG0016692Hg_chrom2_MM26_11455	OG0016692Hg_chrom2_OP50_5865	OG0016692Hg_chrom2_PA3_11292	OG0016692Hg_chrom2_TN20_5570	OG0016692Hg_chrom2_TN22_11418	OG0016692Hg_chrom2_TN7_11443	OG0016692Hg_chrom2_TN8_11229	OG0016692chr9X12_46825
OG0005864	OG0003977Hg_chrom1_TN10_9251	OG0003977Hg_chrom2_MM26_11456	OG0003977Hg_chrom2_OP50_5866	OG0003977Hg_chrom2_PA3_11293	OG0003977Hg_chrom2_TN20_5573	OG0003977Hg_chrom2_TN22_11419	OG0003977Hg_chrom2_TN7_11444	OG0003977Hg_chrom2_TN8_11230	chr9X12_46821
OG0005865	OG0016693Hg_chrom1_TN10_9249	OG0016693Hg_chrom2_MM26_11460	OG0016693Hg_chrom2_OP50_5869	OG0016693Hg_chrom2_PA3_11296	OG0016693Hg_chrom2_TN20_5574	OG0016693Hg_chrom2_TN22_11423	OG0016693Hg_chrom2_TN7_11447	OG0016693Hg_chrom2_TN8_11233	OG0016693chr9X12_46820
OG0005866	OG0002224Hg_chrom1_TN10_9248	OG0002224Hg_chrom2_MM26_11461	OG0002224Hg_chrom2_OP50_5870	OG0002224Hg_chrom2_PA3_11299	OG0002224Hg_chrom2_TN20_5577	OG0002224Hg_chrom2_TN22_11425	OG0002224Hg_chrom2_TN7_11451	OG0002224Hg_chrom2_TN8_11237	OG0002224chr9X12_46816
OG0005867	OG0014591Hg_chrom1_TN10_9247	OG0014591Hg_chrom2_MM26_11466	OG0014591Hg_chrom2_OP50_5876	OG0014591Hg_chrom2_PA3_11303	OG0014591Hg_chrom2_TN20_5579	OG0014591Hg_chrom2_TN7_11455	OG0014591Hg_chrom2_TN8_11238	OG0014591chr9X12_46814	OG0024545Hg_chrom2_TN22_11430
OG0005869	OG0005855Hg_chrom2_TN22_11441	OG0009480Hg_chrom1_TN10_9221	OG0009480Hg_chrom2_MM26_11481	OG0009480Hg_chrom2_OP50_5884	OG0009480Hg_chrom2_TN20_5586	OG0009480Hg_chrom2_TN7_11466	OG0009480Hg_chrom2_TN8_11247	OG0029387chr9X12_46803	OG0039856Hg_chrom2_PA3_11314
OG0005870	OG0005856Hg_chrom1_TN10_9213	OG0005856Hg_chrom2_MM26_11489	OG0005856Hg_chrom2_OP50_5893	OG0005856Hg_chrom2_PA3_11323	OG0005856Hg_chrom2_TN20_5593	OG0005856Hg_chrom2_TN22_11449	OG0005856Hg_chrom2_TN7_11474	OG0005856Hg_chrom2_TN8_11253	OG0005856chr9X12_46793
OG0005872	OG0011648Hg_chrom1_TN10_9161	OG0011648Hg_chrom2_MM26_11545	OG0011648Hg_chrom2_OP50_5940	OG0011648Hg_chrom2_PA3_11349	OG0011648Hg_chrom2_TN20_5663	OG0011648Hg_chrom2_TN22_11552	OG0011648Hg_chrom2_TN7_11527	OG0011648Hg_chrom2_TN8_11323	OG0011648chr9X12_46742
OG0005873	OG0016696Hg_chrom1_TN10_9158	OG0016696Hg_chrom2_MM26_11548	OG0016696Hg_chrom2_OP50_5943	OG0016696Hg_chrom2_PA3_11353	OG0016696Hg_chrom2_TN20_5661	OG0016696Hg_chrom2_TN22_11548	OG0016696Hg_chrom2_TN7_11531	OG0016696Hg_chrom2_TN8_11327	OG0016696chr9X12_46740
OG0005874	OG0007569Hg_chrom1_TN10_9154	OG0007569Hg_chrom2_MM26_11549	OG0007569Hg_chrom2_OP50_5944	OG0007569Hg_chrom2_PA3_11355	OG0007569Hg_chrom2_TN20_5659	OG0007569Hg_chrom2_TN22_11545	OG0007569Hg_chrom2_TN7_11532	OG0007569Hg_chrom2_TN8_11328	OG0007569chr9X12_46737
OG0005875	OG0003978Hg_chrom1_TN10_9144	OG0003978Hg_chrom2_OP50_5955	OG0003978Hg_chrom2_PA3_11364	OG0003978Hg_chrom2_TN20_5651	OG0003978Hg_chrom2_TN7_11543	OG0003978Hg_chrom2_TN8_11341	OG0003978chr9X12_46716	OG0024548Hg_chrom2_MM26_11559	OG0024548Hg_chrom2_TN22_11533
OG0005876	Hg_chrom2_MM26_11562	OG0006636Hg_chrom1_TN10_9142	OG0006636Hg_chrom2_OP50_5958	OG0006636Hg_chrom2_PA3_11366	OG0006636Hg_chrom2_TN20_5650	OG0006636Hg_chrom2_TN22_11530	OG0006636Hg_chrom2_TN7_11544	OG0006636Hg_chrom2_TN8_11343	OG0006636chr9X12_46714
OG0005877	OG0002819Hg_chrom1_TN10_9140	OG0002819Hg_chrom2_MM26_11567	OG0002819Hg_chrom2_OP50_5962	OG0002819Hg_chrom2_PA3_11369	OG0002819Hg_chrom2_TN20_5648	OG0002819Hg_chrom2_TN22_11526	OG0002819Hg_chrom2_TN7_11546	OG0002819Hg_chrom2_TN8_11344	OG0002819chr9X12_46712
OG0005878	Hg_chrom2_MM26_11568	OG0004513Hg_chrom1_TN10_9135	OG0004513Hg_chrom2_OP50_5966	OG0004513Hg_chrom2_PA3_11372	OG0004513Hg_chrom2_TN20_5646	OG0004513Hg_chrom2_TN22_11523	OG0004513Hg_chrom2_TN7_11551	OG0004513Hg_chrom2_TN8_11349	OG0004513chr9X12_46709
OG0005879	OG0012983Hg_chrom2_OP50_5969	OG0012983Hg_chrom2_TN20_5644	OG0022305Hg_chrom1_TN10_9134	OG0022305Hg_chrom2_MM26_11571	OG0022305Hg_chrom2_PA3_11374	OG0022305Hg_chrom2_TN22_11522	OG0022305Hg_chrom2_TN7_11554	OG0022305Hg_chrom2_TN8_11351	OG0022305chr9X12_46708
OG0005880	OG0010522Hg_chrom1_TN10_9095	OG0010522Hg_chrom2_MM26_11614	OG0010522Hg_chrom2_PA3_11412	OG0010522Hg_chrom2_TN22_11624	OG0010522Hg_chrom2_TN7_11583	OG0010522Hg_chrom2_TN8_11387	OG0010522chr9X12_46668	OG0012984Hg_chrom2_OP50_5997	OG0012984Hg_chrom2_TN20_5680
OG0005881	Hg_chrom2_MM26_11621	OG0001014Hg_chrom1_TN10_9094	OG0001014Hg_chrom2_OP50_6004	OG0001014Hg_chrom2_PA3_11419	OG0001014Hg_chrom2_TN20_5686	OG0001014Hg_chrom2_TN22_11629	OG0001014Hg_chrom2_TN7_11592	OG0001014Hg_chrom2_TN8_11392	OG0001014chr9X12_46663
OG0005882	OG0008525Hg_chrom1_TN10_9089	OG0008525Hg_chrom2_MM26_11625	OG0008525Hg_chrom2_OP50_6008	OG0008525Hg_chrom2_PA3_11421	OG0008525Hg_chrom2_TN20_5688	OG0008525Hg_chrom2_TN22_11633	OG0008525Hg_chrom2_TN7_11597	OG0008525Hg_chrom2_TN8_11397	OG0008525chr9X12_46660
OG0005883	Hg_chrom2_MM26_11629	OG0002509Hg_chrom1_TN10_9086	OG0002509Hg_chrom2_OP50_6010	OG0002509Hg_chrom2_PA3_11424	OG0002509Hg_chrom2_TN20_5690	OG0002509Hg_chrom2_TN22_11636	OG0002509Hg_chrom2_TN7_11600	OG0002509Hg_chrom2_TN8_11400	OG0002509chr9X12_46658
OG0005884	OG0010523Hg_chrom1_TN10_9083	OG0010523Hg_chrom2_MM26_11635	OG0010523Hg_chrom2_OP50_6012	OG0010523Hg_chrom2_PA3_11427	OG0010523Hg_chrom2_TN20_5692	OG0010523Hg_chrom2_TN22_11639	OG0010523Hg_chrom2_TN7_11606	OG0010523Hg_chrom2_TN8_11406	OG0010523chr9X12_46654
OG0005885	Hg_chrom2_OP50_6018	OG0014599Hg_chrom1_TN10_9078	OG0014599Hg_chrom2_MM26_11639	OG0014599Hg_chrom2_PA3_11436	OG0014599Hg_chrom2_TN20_5699	OG0014599Hg_chrom2_TN22_11650	OG0014599Hg_chrom2_TN7_11613	OG0014599Hg_chrom2_TN8_11411	OG0014599chr9X12_46648
OG0005886	OG0016701Hg_chrom1_TN10_9076	OG0016701Hg_chrom2_MM26_11640	OG0016701Hg_chrom2_PA3_11438	OG0016701Hg_chrom2_TN7_11614	OG0016701chr9X12_46646	OG0021663Hg_chrom2_OP50_6021	OG0021663Hg_chrom2_TN20_5700	OG0021663Hg_chrom2_TN22_11653	OG0021663Hg_chrom2_TN8_11413
OG0005887	OG0006637Hg_chrom1_TN10_9074	OG0006637Hg_chrom2_MM26_11642	OG0006637Hg_chrom2_OP50_6023	OG0006637Hg_chrom2_PA3_11439	OG0006637Hg_chrom2_TN20_5702	OG0006637Hg_chrom2_TN22_11656	OG0006637Hg_chrom2_TN7_11616	OG0006637Hg_chrom2_TN8_11416	OG0006637chr9X12_46643
OG0005888	OG0016702Hg_chrom1_TN10_9072	OG0016702Hg_chrom2_MM26_11646	OG0016702Hg_chrom2_PA3_11442	OG0016702Hg_chrom2_TN20_5704	OG0016702Hg_chrom2_TN22_11659	OG0016702Hg_chrom2_TN7_11619	OG0016702Hg_chrom2_TN8_11419	OG0016703Hg_chrom2_OP50_6026	OG0024550chr9X12_46642
OG0005889	OG0001239Hg_chrom1_TN10_9069	OG0001239Hg_chrom2_MM26_11651	OG0001239Hg_chrom2_OP50_6029	OG0001239Hg_chrom2_PA3_11449	OG0001239Hg_chrom2_TN20_5708	OG0001239Hg_chrom2_TN22_11662	OG0001239Hg_chrom2_TN7_11623	OG0001239Hg_chrom2_TN8_11424	OG0001239chr9X12_46637
OG0005890	OG0014600Hg_chrom1_TN10_9065	OG0014600Hg_chrom2_MM26_11655	OG0014600Hg_chrom2_OP50_6032	OG0014600Hg_chrom2_PA3_11453	OG0014600Hg_chrom2_TN20_5711	OG0014600Hg_chrom2_TN22_11670	OG0014600Hg_chrom2_TN7_11628	OG0014600Hg_chrom2_TN8_11429	OG0014600chr9X12_46631
OG0005891	OG0007571Hg_chrom1_TN10_9063	OG0007571Hg_chrom2_MM26_11660	OG0007571Hg_chrom2_OP50_6043	OG0007571Hg_chrom2_PA3_11459	OG0007571Hg_chrom2_TN20_5716	OG0007571Hg_chrom2_TN22_11676	OG0007571Hg_chrom2_TN7_11636	OG0007571Hg_chrom2_TN8_11435	OG0007571chr9X12_46628
OG0005892	Hg_chrom2_TN8_11444	OG0005858Hg_chrom1_TN10_9058	OG0005858Hg_chrom2_MM26_11667	OG0005858Hg_chrom2_OP50_6047	OG0005858Hg_chrom2_PA3_11467	OG0005858Hg_chrom2_TN20_5724	OG0005858Hg_chrom2_TN22_11684	OG0005858Hg_chrom2_TN7_11643	OG0005858chr9X12_46623
OG0005893	OG0010525Hg_chrom1_TN10_9055	OG0010525Hg_chrom2_MM26_11671	OG0010525Hg_chrom2_OP50_6050	OG0010525Hg_chrom2_PA3_11472	OG0010525Hg_chrom2_TN20_5717	OG0010525Hg_chrom2_TN22_11689	OG0010525chr9X12_46618	OG0036176Hg_chrom2_TN7_11646	OG0036176Hg_chrom2_TN8_11447
OG0005894	OG0016705Hg_chrom1_TN10_9049	OG0016705Hg_chrom2_MM26_11679	OG0016705Hg_chrom2_OP50_6054	OG0016705Hg_chrom2_PA3_11477	OG0016705Hg_chrom2_TN20_5729	OG0016705Hg_chrom2_TN22_11692	OG0016705Hg_chrom2_TN7_11653	OG0016705Hg_chrom2_TN8_11454	OG0016705chr9X12_46612
OG0005895	OG0012986Hg_chrom2_TN22_11695	OG0012986Hg_chrom2_TN7_11655	OG0012986Hg_chrom2_TN8_11457	OG0012987Hg_chrom1_TN10_9047	OG0012987Hg_chrom2_MM26_11683	OG0012987Hg_chrom2_OP50_6058	OG0012987Hg_chrom2_PA3_11481	OG0012987Hg_chrom2_TN20_5732	OG0012987chr9X12_46606
OG0005896	OG0004515Hg_chrom1_TN10_9045	OG0004515Hg_chrom2_MM26_11686	OG0004515Hg_chrom2_OP50_6061	OG0004515Hg_chrom2_PA3_11484	OG0004515Hg_chrom2_TN20_5734	OG0004515chr9X12_46604	OG0031192Hg_chrom2_TN22_11700	OG0031192Hg_chrom2_TN7_11660	OG0031192Hg_chrom2_TN8_11463
OG0005897	OG0007572Hg_chrom1_TN10_9042	OG0007572Hg_chrom2_MM26_11688	OG0007572Hg_chrom2_OP50_6064	OG0007572Hg_chrom2_PA3_11488	OG0007572Hg_chrom2_TN20_5737	OG0007572Hg_chrom2_TN22_11703	OG0007572Hg_chrom2_TN7_11663	OG0007572Hg_chrom2_TN8_11466	OG0007572chr9X12_46598
OG0005898	OG0009483Hg_chrom1_TN10_9041	OG0009483Hg_chrom2_MM26_11690	OG0009483Hg_chrom2_OP50_6066	OG0009483Hg_chrom2_PA3_11490	OG0009483Hg_chrom2_TN20_5744	OG0009483Hg_chrom2_TN22_11705	OG0009483Hg_chrom2_TN7_11665	OG0009483Hg_chrom2_TN8_11469	OG0009483chr9X12_46596
OG0005899	OG0005859Hg_chrom1_TN10_9037	OG0005859Hg_chrom2_OP50_6073	OG0005859Hg_chrom2_PA3_11496	OG0005859Hg_chrom2_TN20_5748	OG0005859Hg_chrom2_TN22_11712	OG0005859Hg_chrom2_TN7_11669	OG0005859Hg_chrom2_TN8_11478	OG0005859chr9X12_46591	OG0014601Hg_chrom2_MM26_11696
OG0005900	OG0002225Hg_chrom1_TN10_9006	OG0002225Hg_chrom2_MM26_11717	OG0002225Hg_chrom2_OP50_6085	OG0002225Hg_chrom2_TN20_5773	OG0002225Hg_chrom2_TN7_11698	OG0002225Hg_chrom2_TN8_11504	OG0007573Hg_chrom2_PA3_11517	OG0007573Hg_chrom2_TN22_11741	OG0014602chr9X12_46570
OG0005901	OG0016709Hg_chrom2_MM26_11720	OG0016709Hg_chrom2_OP50_6087	OG0016709Hg_chrom2_PA3_11522	OG0016709Hg_chrom2_TN20_5776	OG0016709Hg_chrom2_TN7_11704	OG0036178Hg_chrom2_TN22_11746	OG0036178Hg_chrom2_TN8_11508	OG0040884Hg_chrom1_TN10_9003	OG0040884chr9X12_46566
OG0005902	OG0011651Hg_chrom1_TN10_8999	OG0011651Hg_chrom2_MM26_11722	OG0011651Hg_chrom2_OP50_6088	OG0011651Hg_chrom2_PA3_11524	OG0011651Hg_chrom2_TN20_5777	OG0011651Hg_chrom2_TN22_11749	OG0011651Hg_chrom2_TN7_11707	OG0011651Hg_chrom2_TN8_11511	OG0011651chr9X12_46563
OG0005903	Hg_chrom2_OP50_6091	Hg_chrom2_TN20_5780	OG0012988Hg_chrom1_TN10_8996	OG0012988Hg_chrom2_MM26_11724	OG0012988Hg_chrom2_PA3_11526	OG0012988Hg_chrom2_TN22_11751	OG0012988chr9X12_46560	OG0036179Hg_chrom2_TN7_11709	OG0036179Hg_chrom2_TN8_11513
OG0005904	Hg_chrom2_MM26_11726	OG0012989Hg_chrom1_TN10_8993	OG0012989Hg_chrom2_OP50_6092	OG0012989Hg_chrom2_PA3_11528	OG0012989Hg_chrom2_TN20_5781	OG0012989chr9X12_46557	OG0026043Hg_chrom2_TN22_11755	OG0026043Hg_chrom2_TN7_11711	OG0026043Hg_chrom2_TN8_11516
OG0005905	Hg_chrom1_TN10_8984	OG0009484Hg_chrom2_MM26_11731	OG0009484Hg_chrom2_OP50_6096	OG0009484Hg_chrom2_PA3_11533	OG0009484Hg_chrom2_TN20_5786	OG0009484Hg_chrom2_TN22_11757	OG0009484Hg_chrom2_TN7_11713	OG0009484chr9X12_46551	OG0026282Hg_chrom2_TN8_11519
OG0005906	OG0016710Hg_chrom1_TN10_8953	OG0016710Hg_chrom2_MM26_11771	OG0016710Hg_chrom2_OP50_6128	OG0016710Hg_chrom2_PA3_11570	OG0016710Hg_chrom2_TN20_5816	OG0016710Hg_chrom2_TN8_11556	OG0016710chr9X12_46510	OG0036180Hg_chrom2_TN22_11800	OG0036180Hg_chrom2_TN7_11751
OG0005907	Hg_chrom1_TN10_8943	OG0001015Hg_chrom2_MM26_11778	OG0001015Hg_chrom2_OP50_6137	OG0001015Hg_chrom2_PA3_11578	OG0001015Hg_chrom2_TN20_5824	OG0001015Hg_chrom2_TN22_11807	OG0001015Hg_chrom2_TN7_11757	OG0001015Hg_chrom2_TN8_11564	OG0001015chr9X12_46498
OG0005908	OG0010528Hg_chrom1_TN10_8939	OG0010528Hg_chrom2_MM26_11783	OG0010528Hg_chrom2_OP50_6139	OG0010528Hg_chrom2_PA3_11583	OG0010528Hg_chrom2_TN20_5828	OG0010528Hg_chrom2_TN22_11814	OG0010528Hg_chrom2_TN7_11761	OG0010528Hg_chrom2_TN8_11569	OG0010528chr9X12_46497
OG0005910	Hg_chrom1_TN10_8935	OG0003143Hg_chrom2_MM26_11787	OG0003143Hg_chrom2_OP50_6144	OG0003143Hg_chrom2_PA3_11588	OG0003143Hg_chrom2_TN20_5834	OG0003143Hg_chrom2_TN22_11816	OG0003143Hg_chrom2_TN7_11766	OG0003143Hg_chrom2_TN8_11574	OG0003143chr9X12_46489
OG0005911	OG0012990Hg_chrom2_MM26_11791	OG0012990Hg_chrom2_OP50_6146	OG0012990Hg_chrom2_PA3_11591	OG0012990Hg_chrom2_TN22_11819	OG0012990Hg_chrom2_TN7_11770	OG0012990Hg_chrom2_TN8_11578	OG0024552Hg_chrom1_TN10_8932	OG0042161Hg_chrom2_TN20_5835	OG0042161chr9X12_46487
OG0005912	OG0016714Hg_chrom1_TN10_8930	OG0016714Hg_chrom2_MM26_11794	OG0016714Hg_chrom2_OP50_6148	OG0016714Hg_chrom2_PA3_11595	OG0016714Hg_chrom2_TN20_5838	OG0016714Hg_chrom2_TN22_11823	OG0016714Hg_chrom2_TN7_11773	OG0016714Hg_chrom2_TN8_11581	OG0016714chr9X12_46484
OG0005913	Hg_chrom2_MM26_11796	OG0021664Hg_chrom1_TN10_8926	OG0021664Hg_chrom2_OP50_6152	OG0021664Hg_chrom2_PA3_11596	OG0021664Hg_chrom2_TN20_5840	OG0021664Hg_chrom2_TN22_11824	OG0021664Hg_chrom2_TN7_11776	OG0021664Hg_chrom2_TN8_11585	OG0021664chr9X12_46478
OG0005914	OG0016716Hg_chrom1_TN10_8925	OG0016716Hg_chrom2_MM26_11799	OG0016716Hg_chrom2_OP50_6155	OG0016716Hg_chrom2_PA3_11599	OG0016716Hg_chrom2_TN20_5843	OG0016716Hg_chrom2_TN22_11827	OG0016716Hg_chrom2_TN7_11779	OG0016716Hg_chrom2_TN8_11588	OG0016716chr9X12_46477
OG0005915	OG0007576Hg_chrom1_TN10_8924	OG0007576Hg_chrom2_MM26_11800	OG0007576Hg_chrom2_OP50_6156	OG0007576Hg_chrom2_PA3_11601	OG0007576Hg_chrom2_TN20_5845	OG0007576Hg_chrom2_TN22_11828	OG0007576Hg_chrom2_TN7_11780	OG0007576Hg_chrom2_TN8_11589	OG0007576chr9X12_46476
OG0005916	OG0002511Hg_chrom1_TN10_8921	OG0002511Hg_chrom2_MM26_11803	OG0002511Hg_chrom2_OP50_6160	OG0002511Hg_chrom2_PA3_11603	OG0002511Hg_chrom2_TN20_5846	OG0002511Hg_chrom2_TN22_11831	OG0002511Hg_chrom2_TN7_11781	OG0002511Hg_chrom2_TN8_11592	OG0002511chr9X12_46472
OG0005917	OG0002822Hg_chrom2_PA3_11606	OG0002822Hg_chrom2_TN20_5854	OG0002822Hg_chrom2_TN22_11834	OG0005862Hg_chrom1_TN10_8913	OG0005862Hg_chrom2_MM26_11809	OG0005862Hg_chrom2_OP50_6163	OG0005862Hg_chrom2_TN7_11785	OG0005862Hg_chrom2_TN8_11595	OG0005862chr9X12_46465
OG0005918	OG0004516Hg_chrom1_TN10_8911	OG0004516Hg_chrom2_MM26_11817	OG0004516Hg_chrom2_OP50_6171	OG0004516Hg_chrom2_PA3_11613	OG0004516Hg_chrom2_TN20_5857	OG0004516Hg_chrom2_TN22_11839	OG0004516Hg_chrom2_TN7_11793	OG0004516Hg_chrom2_TN8_11603	OG0004516chr9X12_46459
OG0005919	OG0003531Hg_chrom1_TN10_8904	OG0003531Hg_chrom2_MM26_11825	OG0003531Hg_chrom2_OP50_6176	OG0003531Hg_chrom2_PA3_11619	OG0003531Hg_chrom2_TN20_5862	OG0003531Hg_chrom2_TN22_11848	OG0003531Hg_chrom2_TN7_11798	OG0003531Hg_chrom2_TN8_11610	OG0003531chr9X12_46452
OG0005920	OG0003532Hg_chrom1_TN10_8899	OG0003532Hg_chrom2_MM26_11829	OG0003532Hg_chrom2_OP50_6182	OG0003532Hg_chrom2_PA3_11620	OG0003532Hg_chrom2_TN20_5869	OG0003532Hg_chrom2_TN22_11850	OG0003532Hg_chrom2_TN7_11802	OG0003532Hg_chrom2_TN8_11615	OG0003532chr9X12_46450
OG0005921	OG0003145Hg_chrom1_TN10_8896	OG0003145Hg_chrom2_OP50_6185	OG0003145Hg_chrom2_PA3_11627	OG0003145Hg_chrom2_TN22_11853	OG0003145Hg_chrom2_TN7_11805	OG0003145Hg_chrom2_TN8_11617	OG0003145chr9X12_46446	OG0037419Hg_chrom2_MM26_11834	OG0037419Hg_chrom2_TN20_5873
OG0005924	OG0005864Hg_chrom1_TN10_8844	OG0005864Hg_chrom2_MM26_11902	OG0005864Hg_chrom2_OP50_6227	OG0005864Hg_chrom2_PA3_11677	OG0005864Hg_chrom2_TN20_5914	OG0005864Hg_chrom2_TN22_11904	OG0005864Hg_chrom2_TN7_11856	OG0005864Hg_chrom2_TN8_11666	OG0005864chr9X12_46362
OG0005926	OG0016721Hg_chrom1_TN10_8833	OG0016721Hg_chrom2_MM26_11914	OG0016721Hg_chrom2_OP50_6235	OG0016721Hg_chrom2_TN20_5922	OG0016721Hg_chrom2_TN22_11919	OG0016721Hg_chrom2_TN7_11870	OG0016721Hg_chrom2_TN8_11681	OG0034697Hg_chrom2_PA3_11692	OG0034697chr9X12_46350
OG0005927	OG0003533Hg_chrom1_TN10_8827	OG0003533Hg_chrom2_MM26_11921	OG0003533Hg_chrom2_OP50_6243	OG0003533Hg_chrom2_PA3_11699	OG0003533Hg_chrom2_TN20_5931	OG0003533Hg_chrom2_TN22_11926	OG0003533Hg_chrom2_TN7_11877	OG0003533Hg_chrom2_TN8_11687	OG0003533chr9X12_46340
OG0005928	OG0002512Hg_chrom1_TN10_8825	OG0002512Hg_chrom2_MM26_11923	OG0002512Hg_chrom2_OP50_6247	OG0002512Hg_chrom2_PA3_11701	OG0002512Hg_chrom2_TN20_5933	OG0002512Hg_chrom2_TN22_11929	OG0002512Hg_chrom2_TN7_11882	OG0002512Hg_chrom2_TN8_11690	OG0002512chr9X12_46337
OG0005929	OG0005118Hg_chrom2_OP50_6249	OG0005118Hg_chrom2_TN20_5936	OG0019587Hg_chrom1_TN10_8820	OG0019587Hg_chrom2_MM26_11926	OG0019587Hg_chrom2_PA3_11704	OG0019587Hg_chrom2_TN22_11932	OG0019587Hg_chrom2_TN7_11883	OG0019587Hg_chrom2_TN8_11693	OG0019587chr9X12_46334
OG0005930	OG0006641Hg_chrom1_TN10_8815	OG0006641Hg_chrom2_MM26_11933	OG0006641Hg_chrom2_PA3_11709	OG0006641Hg_chrom2_TN22_11936	OG0006641Hg_chrom2_TN7_11888	OG0006641Hg_chrom2_TN8_11697	OG0006641chr9X12_46327	OG0025753Hg_chrom2_OP50_6251	OG0025753Hg_chrom2_TN20_5937
OG0005931	OG0005119Hg_chrom1_TN10_8803	OG0005119Hg_chrom2_TN20_5944	OG0005119Hg_chrom2_TN8_11708	OG0022318Hg_chrom2_MM26_11940	OG0022318Hg_chrom2_OP50_6259	OG0022318Hg_chrom2_PA3_11716	OG0022318Hg_chrom2_TN22_11947	OG0022318Hg_chrom2_TN7_11896	OG0022318chr9X12_46323
OG0005932	OG0007579Hg_chrom1_TN10_8802	OG0007579Hg_chrom2_MM26_11945	OG0007579Hg_chrom2_OP50_6265	OG0007579Hg_chrom2_PA3_11721	OG0007579Hg_chrom2_TN20_5951	OG0007579Hg_chrom2_TN22_11951	OG0007579Hg_chrom2_TN7_11899	OG0007579Hg_chrom2_TN8_11711	OG0007579chr9X12_46317
OG0005933	OG0014610Hg_chrom1_TN10_8800	OG0014610Hg_chrom2_MM26_11946	OG0014610Hg_chrom2_OP50_6266	OG0014610Hg_chrom2_PA3_11722	OG0014610Hg_chrom2_TN20_5952	OG0014610Hg_chrom2_TN22_11953	OG0014610Hg_chrom2_TN8_11713	OG0014610chr9X12_46315	OG0022319Hg_chrom2_TN7_11902
OG0005934	OG0002823Hg_chrom1_TN10_8798	OG0002823Hg_chrom2_MM26_11949	OG0002823Hg_chrom2_OP50_6268	OG0002823Hg_chrom2_PA3_11724	OG0002823Hg_chrom2_TN20_5953	OG0002823Hg_chrom2_TN22_11957	OG0002823Hg_chrom2_TN7_11903	OG0002823Hg_chrom2_TN8_11717	OG0002823chr9X12_46313
OG0005935	OG0008529Hg_chrom1_TN10_8795	OG0008529Hg_chrom2_MM26_11951	OG0008529Hg_chrom2_OP50_6269	OG0008529Hg_chrom2_PA3_11726	OG0008529Hg_chrom2_TN20_5957	OG0008529Hg_chrom2_TN7_11905	OG0008529chr9X12_46310	OG0042595Hg_chrom2_TN22_11959	OG0042595Hg_chrom2_TN8_11719
OG0005936	OG0006642Hg_chrom1_TN10_8775	OG0006642Hg_chrom2_MM26_11971	OG0006642Hg_chrom2_OP50_6292	OG0006642Hg_chrom2_PA3_11751	OG0006642Hg_chrom2_TN20_5976	OG0006642Hg_chrom2_TN22_11972	OG0006642Hg_chrom2_TN7_11942	OG0006642Hg_chrom2_TN8_11743	OG0006642chr9X12_46285
OG0005938	OG0014613Hg_chrom1_TN10_8771	OG0014613Hg_chrom2_MM26_11982	OG0014613Hg_chrom2_OP50_6286	OG0014613Hg_chrom2_PA3_11766	OG0014613Hg_chrom2_TN20_5983	OG0014613Hg_chrom2_TN22_11985	OG0014613Hg_chrom2_TN7_11949	OG0014613Hg_chrom2_TN8_11749	OG0014613chr9X12_46279
OG0005939	OG0005121Hg_chrom1_TN10_8763	OG0005121Hg_chrom2_MM26_11986	OG0005121Hg_chrom2_OP50_6298	OG0005121Hg_chrom2_PA3_11767	OG0005121Hg_chrom2_TN20_5989	OG0005121Hg_chrom2_TN8_11763	OG0005121chr9X12_46270	OG0042596Hg_chrom2_TN22_11991	OG0042596Hg_chrom2_TN7_11954
OG0005940	OG0006644Hg_chrom2_MM26_11993	OG0006644Hg_chrom2_PA3_11773	OG0006644Hg_chrom2_TN22_12003	OG0006644Hg_chrom2_TN7_11962	OG0006644Hg_chrom2_TN8_11765	OG0006644chr9X12_46261	OG0022323Hg_chrom1_TN10_8754	OG0038898Hg_chrom2_OP50_6306	OG0038898Hg_chrom2_TN20_5996
OG0005941	OG0009493Hg_chrom1_TN10_8749	OG0009493Hg_chrom2_MM26_11997	OG0009493Hg_chrom2_OP50_6310	OG0009493Hg_chrom2_PA3_11777	OG0009493Hg_chrom2_TN20_6000	OG0009493Hg_chrom2_TN22_11993	OG0009493Hg_chrom2_TN7_11968	OG0009493Hg_chrom2_TN8_11771	OG0009493chr9X12_46256
OG0005942	OG0012994Hg_chrom1_TN10_8727	OG0012994Hg_chrom2_MM26_12018	OG0012994Hg_chrom2_OP50_6326	OG0012994Hg_chrom2_PA3_11797	OG0012994Hg_chrom2_TN20_6017	OG0012994Hg_chrom2_TN22_12031	OG0012994Hg_chrom2_TN7_11995	OG0012994Hg_chrom2_TN8_11797	OG0012994chr9X12_46232
OG0005943	OG0002824Hg_chrom1_TN10_8724	OG0002824Hg_chrom2_MM26_12021	OG0002824Hg_chrom2_OP50_6329	OG0002824Hg_chrom2_PA3_11788	OG0002824Hg_chrom2_TN20_6019	OG0002824Hg_chrom2_TN22_12018	OG0002824Hg_chrom2_TN7_11996	OG0002824Hg_chrom2_TN8_11801	OG0043367chr9X12_46230
OG0005944	OG0016136Hg_chrom2_OP50_6337	OG0016136Hg_chrom2_TN20_6028	OG0016136Hg_chrom2_TN22_12043	OG0016136Hg_chrom2_TN7_12013	OG0016136Hg_chrom2_TN8_11814	OG0016727Hg_chrom2_MM26_12034	OG0016727Hg_chrom2_PA3_11810	OG0016727chr9X12_46212	OG0030682Hg_chrom1_TN10_8709
OG0005946	OG0004518Hg_chrom1_TN10_8636	OG0004518Hg_chrom2_MM26_12100	OG0004518Hg_chrom2_OP50_6391	OG0004518Hg_chrom2_PA3_11876	OG0004518Hg_chrom2_TN20_6087	OG0004518Hg_chrom2_TN22_12105	OG0004518Hg_chrom2_TN7_12081	OG0004518Hg_chrom2_TN8_11884	OG0004518chr9X12_46206
OG0005947	OG0003982Hg_chrom1_TN10_8635	OG0003982Hg_chrom2_MM26_12103	OG0003982Hg_chrom2_OP50_6395	OG0003982Hg_chrom2_PA3_11878	OG0003982Hg_chrom2_TN20_6090	OG0003982Hg_chrom2_TN22_12109	OG0003982Hg_chrom2_TN7_12085	OG0003982Hg_chrom2_TN8_11887	OG0003982chr9X12_46209
OG0005948	OG0005123Hg_chrom1_TN10_8616	OG0005123Hg_chrom2_MM26_12115	OG0005123Hg_chrom2_OP50_6408	OG0005123Hg_chrom2_PA3_11892	OG0005123Hg_chrom2_TN20_6102	OG0005123chr9X12_46204	OG0026281Hg_chrom2_TN22_12125	OG0026281Hg_chrom2_TN7_12100	OG0026281Hg_chrom2_TN8_11902
OG0005949	OG0016733Hg_chrom1_TN10_8612	OG0016733Hg_chrom2_MM26_12118	OG0016733Hg_chrom2_OP50_6410	OG0016733Hg_chrom2_PA3_11895	OG0016733Hg_chrom2_TN20_6104	OG0016733Hg_chrom2_TN22_12127	OG0016733Hg_chrom2_TN7_12102	OG0016733Hg_chrom2_TN8_11907	OG0016733chr9X12_46199
OG0005950	OG0003534Hg_chrom1_TN10_8606	OG0003534Hg_chrom2_MM26_12123	OG0003534Hg_chrom2_PA3_11901	OG0003534Hg_chrom2_TN22_12133	OG0003534Hg_chrom2_TN7_12108	OG0003534Hg_chrom2_TN8_11914	OG0008531Hg_chrom2_OP50_6413	OG0008531Hg_chrom2_TN20_6106	OG0008531chr9X12_46194
OG0005951	OG0005870Hg_chrom1_TN10_8603	OG0012997Hg_chrom2_MM26_12125	OG0012997Hg_chrom2_PA3_11903	OG0014618Hg_chrom2_TN22_12135	OG0019040Hg_chrom2_OP50_6421	OG0019040Hg_chrom2_TN20_6111	OG0019040Hg_chrom2_TN7_12110	OG0019040Hg_chrom2_TN8_11915	OG0019040chr9X12_46188
OG0005952	OG0000912Hg_chrom1_TN10_8591	OG0000912Hg_chrom2_MM26_12139	OG0000912Hg_chrom2_OP50_6430	OG0000912Hg_chrom2_PA3_11915	OG0000912Hg_chrom2_TN20_6118	OG0000912Hg_chrom2_TN22_12147	OG0000912Hg_chrom2_TN7_12125	OG0000912Hg_chrom2_TN8_11929	OG0000912chr9X12_46179
OG0005953	OG0005871Hg_chrom2_MM26_12144	OG0005871Hg_chrom2_OP50_6436	OG0005871Hg_chrom2_TN20_6120	OG0005871Hg_chrom2_TN22_12151	OG0005871Hg_chrom2_TN7_12131	OG0005871Hg_chrom2_TN8_11933	OG0005871chr9X12_46173	OG0014619Hg_chrom2_PA3_11922	OG0016736Hg_chrom1_TN10_8589
OG0005954	OG0010539Hg_chrom1_TN10_8575	OG0010539Hg_chrom2_MM26_12151	OG0010539Hg_chrom2_OP50_6442	OG0010539Hg_chrom2_PA3_11931	OG0010539Hg_chrom2_TN20_6129	OG0010539Hg_chrom2_TN22_12160	OG0010539Hg_chrom2_TN7_12139	OG0010539Hg_chrom2_TN8_11939	OG0010539chr9X12_48160
OG0005955	OG0008532Hg_chrom1_TN10_8573	OG0008532Hg_chrom2_MM26_12156	OG0008532Hg_chrom2_OP50_6446	OG0008532Hg_chrom2_PA3_11935	OG0008532Hg_chrom2_TN20_6132	OG0008532Hg_chrom2_TN22_12165	OG0008532Hg_chrom2_TN7_12143	OG0008532Hg_chrom2_TN8_11943	chr9X12_46155
OG0005956	OG0003146Hg_chrom1_TN10_8557	OG0003146Hg_chrom2_MM26_12170	OG0003146Hg_chrom2_OP50_6465	OG0003146Hg_chrom2_TN7_12157	OG0003146Hg_chrom2_TN8_11955	OG0003146chr9X12_46133	OG0011661Hg_chrom2_TN20_6153	OG0016742Hg_chrom2_PA3_11954	OG0016742Hg_chrom2_TN22_12183
OG0005957	OG0001992chr9X12_46126	OG0022334Hg_chrom1_TN10_8552	OG0022334Hg_chrom2_MM26_12175	OG0022334Hg_chrom2_OP50_6468	OG0022334Hg_chrom2_TN22_12188	OG0022334Hg_chrom2_TN7_12163	OG0022334Hg_chrom2_TN8_11961	OG0022335Hg_chrom2_PA3_11959	OG0022335Hg_chrom2_TN20_6156
OG0005958	OG0010540Hg_chrom1_TN10_8540	OG0010540Hg_chrom2_MM26_12183	OG0010540Hg_chrom2_OP50_6479	OG0010540Hg_chrom2_PA3_11966	OG0010540Hg_chrom2_TN20_6165	OG0010540Hg_chrom2_TN22_12197	OG0010540Hg_chrom2_TN7_12171	OG0010540Hg_chrom2_TN8_11972	OG0010540chr9X12_46117
OG0005959	OG0005872Hg_chrom1_TN10_8533	OG0005872Hg_chrom2_MM26_12190	OG0005872Hg_chrom2_OP50_6483	OG0005872Hg_chrom2_PA3_11971	OG0005872Hg_chrom2_TN20_6169	OG0005872Hg_chrom2_TN22_12200	OG0005872Hg_chrom2_TN7_12174	OG0005872Hg_chrom2_TN8_11975	chr9X12_46113
OG0005960	OG0008534Hg_chrom1_TN10_8503	OG0008534Hg_chrom2_MM26_12214	OG0008534Hg_chrom2_OP50_6513	OG0008534Hg_chrom2_PA3_11999	OG0008534Hg_chrom2_TN20_6196	OG0008534Hg_chrom2_TN22_12227	OG0008534Hg_chrom2_TN7_12202	OG0008534Hg_chrom2_TN8_12005	OG0008534chr9X12_46082
OG0005961	OG0005126Hg_chrom1_TN10_8500	OG0005126Hg_chrom2_MM26_12216	OG0005126Hg_chrom2_OP50_6517	OG0005126Hg_chrom2_PA3_12002	OG0005126Hg_chrom2_TN20_6197	OG0005126Hg_chrom2_TN22_12229	OG0005126Hg_chrom2_TN7_12203	OG0005126Hg_chrom2_TN8_12006	OG0005126chr9X12_46079
OG0005962	Hg_chrom1_TN10_8498	OG0003984Hg_chrom2_MM26_12219	OG0003984Hg_chrom2_PA3_12004	OG0003984Hg_chrom2_TN20_6198	OG0003984Hg_chrom2_TN22_12231	OG0003984chr9X12_46076	OG0034109Hg_chrom2_OP50_6520	OG0034109Hg_chrom2_TN7_12207	OG0034109Hg_chrom2_TN8_12010
OG0005963	OG0003985Hg_chrom1_TN10_8492	OG0003985Hg_chrom2_MM26_12226	OG0003985Hg_chrom2_OP50_6526	OG0003985Hg_chrom2_PA3_12011	OG0003985Hg_chrom2_TN20_6204	OG0003985Hg_chrom2_TN22_12238	OG0003985Hg_chrom2_TN7_12212	OG0003985Hg_chrom2_TN8_12013	OG0003985chr9X12_46070
OG0005964	OG0013001Hg_chrom1_TN10_8490	OG0013001Hg_chrom2_MM26_12230	OG0013001Hg_chrom2_OP50_6528	OG0013001Hg_chrom2_PA3_12014	OG0013001Hg_chrom2_TN20_6206	OG0013001Hg_chrom2_TN22_12240	OG0013001Hg_chrom2_TN7_12216	OG0013001Hg_chrom2_TN8_12017	OG0013001chr9X12_46068
OG0005965	OG0014623Hg_chrom2_MM26_12241	OG0014623Hg_chrom2_PA3_12023	OG0014623Hg_chrom2_TN8_12025	OG0016748Hg_chrom1_TN10_8481	OG0016748Hg_chrom2_OP50_6537	OG0016748Hg_chrom2_TN20_6216	OG0016748Hg_chrom2_TN7_12226	OG0016748chr9X12_46062	OG0022338Hg_chrom2_TN22_12249
OG0005966	OG0014624Hg_chrom1_TN10_8473	OG0014624Hg_chrom2_MM26_12244	OG0014624Hg_chrom2_OP50_6538	OG0014624Hg_chrom2_PA3_12026	OG0014624Hg_chrom2_TN20_6218	OG0014624Hg_chrom2_TN22_12252	OG0014624Hg_chrom2_TN7_12227	OG0014624Hg_chrom2_TN8_12027	OG0014624chr9X12_46056
OG0005967	Hg_chrom2_TN22_12256	OG0002513Hg_chrom1_TN10_8469	OG0002513Hg_chrom2_MM26_12245	OG0002513Hg_chrom2_OP50_6539	OG0002513Hg_chrom2_PA3_12027	OG0002513Hg_chrom2_TN20_6222	OG0002513Hg_chrom2_TN7_12228	OG0002513Hg_chrom2_TN8_12028	OG0002513chr9X12_46051
OG0005968	Hg_chrom2_PA3_12034	OG0001599Hg_chrom1_TN10_8460	OG0001599Hg_chrom2_MM26_12253	OG0001599Hg_chrom2_OP50_6548	OG0001599Hg_chrom2_TN20_6230	OG0001599Hg_chrom2_TN22_12261	OG0001599Hg_chrom2_TN7_12237	OG0001599Hg_chrom2_TN8_12035	OG0001599chr9X12_46045
OG0005969	OG0001401Hg_chrom1_TN10_8459	OG0001401Hg_chrom2_MM26_12255	OG0001401Hg_chrom2_OP50_6553	OG0001401Hg_chrom2_PA3_12038	OG0001401Hg_chrom2_TN20_6235	OG0001401Hg_chrom2_TN22_12263	OG0001401Hg_chrom2_TN7_12239	OG0001401Hg_chrom2_TN8_12038	OG0001401chr9X12_46040
OG0005970	Hg_chrom1_TN10_8452	OG0013002Hg_chrom2_MM26_12261	OG0013002Hg_chrom2_OP50_6557	OG0013002Hg_chrom2_PA3_12046	OG0013002Hg_chrom2_TN20_6241	OG0013002Hg_chrom2_TN22_12268	OG0013002Hg_chrom2_TN7_12244	OG0013002Hg_chrom2_TN8_12045	OG0013002chr9X12_46037
OG0005971	Hg_chrom2_OP50_6564	OG0013003Hg_chrom1_TN10_8447	OG0013003Hg_chrom2_MM26_12265	OG0013003Hg_chrom2_PA3_12050	OG0013003Hg_chrom2_TN20_6243	OG0013003Hg_chrom2_TN22_12272	OG0013003Hg_chrom2_TN7_12248	OG0013003Hg_chrom2_TN8_12049	OG0013003chr9X12_46034
OG0005972	OG0013004Hg_chrom1_TN10_8433	OG0013004Hg_chrom2_MM26_12273	OG0013004Hg_chrom2_OP50_6570	OG0013004Hg_chrom2_PA3_12060	OG0013004Hg_chrom2_TN20_6250	OG0013004Hg_chrom2_TN22_12281	OG0013004Hg_chrom2_TN7_12257	OG0013004Hg_chrom2_TN8_12057	OG0013004chr9X12_46024
OG0005973	OG0005874Hg_chrom1_TN10_8431	OG0005874Hg_chrom2_MM26_12276	OG0005874Hg_chrom2_OP50_6574	OG0005874Hg_chrom2_PA3_12063	OG0005874Hg_chrom2_TN20_6253	OG0005874Hg_chrom2_TN22_12283	OG0005874Hg_chrom2_TN7_12260	OG0005874Hg_chrom2_TN8_12059	OG0005874chr9X12_46021
OG0005974	OG0009500Hg_chrom1_TN10_8430	OG0009500Hg_chrom2_MM26_12281	OG0009500Hg_chrom2_OP50_6576	OG0009500Hg_chrom2_PA3_12068	OG0009500Hg_chrom2_TN20_6255	OG0009500Hg_chrom2_TN22_12289	OG0009500Hg_chrom2_TN7_12265	OG0009500Hg_chrom2_TN8_12065	OG0009500chr9X12_46018
OG0005975	OG0016751Hg_chrom2_OP50_6580	OG0016751Hg_chrom2_TN20_6259	OG0016751Hg_chrom2_TN22_12291	OG0016751chr9X12_46015	OG0032811Hg_chrom1_TN10_8429	OG0032811Hg_chrom2_MM26_12283	OG0032811Hg_chrom2_PA3_12070	OG0043370Hg_chrom2_TN7_12267	OG0043370Hg_chrom2_TN8_12067
OG0005976	OG0014626Hg_chrom1_TN10_8425	OG0014626Hg_chrom2_MM26_12286	OG0014626Hg_chrom2_OP50_6582	OG0014626Hg_chrom2_PA3_12073	OG0014626Hg_chrom2_TN20_6260	OG0014626Hg_chrom2_TN22_12294	OG0014626Hg_chrom2_TN7_12270	OG0014626Hg_chrom2_TN8_12070	OG0014626chr9X12_46013
OG0005977	OG0005128Hg_chrom1_TN10_8411	OG0005128Hg_chrom2_MM26_12299	OG0005128Hg_chrom2_OP50_6590	OG0005128Hg_chrom2_PA3_12084	OG0005128Hg_chrom2_TN20_6268	OG0005128Hg_chrom2_TN22_12306	OG0005128chr9X12_46001	OG0036190Hg_chrom2_TN7_12286	OG0036190Hg_chrom2_TN8_12085
OG0005978	OG0005875Hg_chrom2_MM26_12305	OG0005875Hg_chrom2_PA3_12094	OG0005875Hg_chrom2_TN20_6282	OG0005875Hg_chrom2_TN22_12316	OG0005875chr9X12_45987	OG0019607Hg_chrom2_OP50_6592	OG0019608Hg_chrom1_TN10_8402	OG0019608Hg_chrom2_TN7_12291	OG0019608Hg_chrom2_TN8_12090
OG0005979	OG0016754Hg_chrom2_MM26_12322	OG0016754Hg_chrom2_PA3_12108	OG0016754Hg_chrom2_TN20_6298	OG0016754Hg_chrom2_TN22_12328	OG0016754Hg_chrom2_TN7_12305	OG0024569Hg_chrom2_OP50_6607	OG0035321Hg_chrom1_TN10_8385	OG0035321Hg_chrom2_TN8_12105	OG0035321chr9X12_45971
OG0005980	Hg_chrom2_PA3_12112	OG0016755Hg_chrom1_TN10_8382	OG0016755Hg_chrom2_MM26_12324	OG0016755Hg_chrom2_OP50_6609	OG0016755Hg_chrom2_TN20_6299	OG0016755Hg_chrom2_TN22_12331	OG0016755Hg_chrom2_TN7_12308	OG0016755Hg_chrom2_TN8_12109	OG0016755chr9X12_45969
OG0005981	OG0003987Hg_chrom1_TN10_8373	OG0003987Hg_chrom2_MM26_12332	OG0003987Hg_chrom2_OP50_6616	OG0003987Hg_chrom2_PA3_12120	OG0003987Hg_chrom2_TN20_6305	OG0003987Hg_chrom2_TN22_12337	OG0003987Hg_chrom2_TN7_12315	OG0003987Hg_chrom2_TN8_12115	OG0003987chr9X12_45958
OG0005982	OG0000913Hg_chrom1_TN10_8363	OG0000913Hg_chrom2_MM26_12338	OG0000913Hg_chrom2_OP50_6624	OG0000913Hg_chrom2_PA3_12130	OG0000913Hg_chrom2_TN22_12344	OG0000913Hg_chrom2_TN7_12323	OG0000913Hg_chrom2_TN8_12120	OG0000913chr9X12_45951	OG0019610Hg_chrom2_TN20_6310
OG0005983	OG0011666Hg_chrom1_TN10_8355	OG0011666Hg_chrom2_MM26_12350	OG0011666Hg_chrom2_OP50_6635	OG0011666Hg_chrom2_PA3_12142	OG0011666Hg_chrom2_TN20_6319	OG0011666Hg_chrom2_TN22_12360	OG0011666Hg_chrom2_TN7_12338	OG0011666Hg_chrom2_TN8_12137	OG0011666chr9X12_45939
OG0005984	OG0010543Hg_chrom1_TN10_8347	OG0010543Hg_chrom2_MM26_12358	OG0010543Hg_chrom2_PA3_12147	OG0010543Hg_chrom2_TN20_6322	OG0010543Hg_chrom2_TN22_12365	OG0010543Hg_chrom2_TN7_12344	OG0010543Hg_chrom2_TN8_12143	OG0010543chr9X12_45931	OG0014628Hg_chrom2_OP50_6641
OG0005985	OG0003537Hg_chrom1_TN10_8337	OG0003537Hg_chrom2_MM26_12366	OG0003537Hg_chrom2_OP50_6649	OG0003537Hg_chrom2_PA3_12155	OG0003537Hg_chrom2_TN20_6326	OG0003537Hg_chrom2_TN22_12374	OG0003537Hg_chrom2_TN8_5954	OG0043371Hg_chrom2_TN7_12354	OG0043371chr9X12_45923
OG0005986	OG0016759Hg_chrom1_TN10_8329	OG0016759Hg_chrom2_MM26_12376	OG0016759Hg_chrom2_OP50_6653	OG0016759Hg_chrom2_PA3_12163	OG0016759Hg_chrom2_TN20_6336	OG0016759Hg_chrom2_TN22_12381	OG0016759Hg_chrom2_TN7_12361	OG0016759Hg_chrom2_TN8_5962	OG0016759chr9X12_45916
OG0005987	OG0009502Hg_chrom1_TN10_8327	OG0009502Hg_chrom2_MM26_12378	OG0009502Hg_chrom2_OP50_6655	OG0009502Hg_chrom2_PA3_12165	OG0009502Hg_chrom2_TN20_6338	OG0009502Hg_chrom2_TN22_12383	OG0009502Hg_chrom2_TN7_12363	OG0009502Hg_chrom2_TN8_5964	OG0009502chr9X12_45914
OG0005988	OG0005878Hg_chrom1_TN10_8325	OG0005878Hg_chrom2_MM26_12380	OG0005878Hg_chrom2_OP50_6657	OG0005878Hg_chrom2_PA3_12167	OG0005878Hg_chrom2_TN20_6340	OG0005878Hg_chrom2_TN22_12385	OG0005878Hg_chrom2_TN7_12365	OG0005878Hg_chrom2_TN8_5966	OG0005878chr9X12_45911
OG0005989	OG0007584Hg_chrom1_TN10_8324	OG0007584Hg_chrom2_PA3_12170	OG0007584Hg_chrom2_TN22_12387	OG0007584Hg_chrom2_TN7_12367	OG0007584Hg_chrom2_TN8_5968	OG0029406Hg_chrom2_MM26_12382	OG0029406Hg_chrom2_OP50_6660	OG0029406Hg_chrom2_TN20_6342	OG0029406chr9X12_45908
OG0005990	OG0001601Hg_chrom1_TN10_8318	OG0001601Hg_chrom2_PA3_12177	OG0001601Hg_chrom2_TN20_6348	OG0001601chr9X12_45904	OG0031630Hg_chrom2_TN22_12393	OG0031630Hg_chrom2_TN7_12372	OG0031630Hg_chrom2_TN8_5973	OG0037436Hg_chrom2_MM26_12393	OG0037436Hg_chrom2_OP50_6670
OG0005991	Hg_chrom1_TN10_8313	OG0007585Hg_chrom2_TN20_6353	OG0022346Hg_chrom2_MM26_12402	OG0022346Hg_chrom2_OP50_6678	OG0022346Hg_chrom2_PA3_12184	OG0022346Hg_chrom2_TN22_12398	OG0022346Hg_chrom2_TN7_12377	OG0022346Hg_chrom2_TN8_5980	OG0022346chr9X12_45898
OG0005992	Hg_chrom2_MM26_12404	OG0003988Hg_chrom1_TN10_8311	OG0003988Hg_chrom2_OP50_6681	OG0003988Hg_chrom2_PA3_12186	OG0003988Hg_chrom2_TN20_6357	OG0003988Hg_chrom2_TN22_12402	OG0003988Hg_chrom2_TN7_12381	OG0003988Hg_chrom2_TN8_5982	OG0003988chr9X12_45894
OG0005993	OG0009503Hg_chrom1_TN10_8306	OG0009503Hg_chrom2_OP50_6682	OG0009503Hg_chrom2_TN20_6358	OG0009503chr9X12_45890	OG0010544Hg_chrom2_MM26_12407	OG0010544Hg_chrom2_PA3_12190	OG0032130Hg_chrom2_TN22_12408	OG0032130Hg_chrom2_TN7_12388	OG0032130Hg_chrom2_TN8_5988
OG0005994	OG0002515Hg_chrom1_TN10_8289	OG0002515Hg_chrom2_MM26_12421	OG0002515Hg_chrom2_OP50_6692	OG0002515Hg_chrom2_PA3_12221	OG0002515Hg_chrom2_TN20_6376	OG0002515Hg_chrom2_TN22_12426	OG0002515Hg_chrom2_TN7_12407	OG0002515Hg_chrom2_TN8_6009	OG0002515chr9X12_45872
OG0005995	OG0005880Hg_chrom1_TN10_8286	OG0005880Hg_chrom2_MM26_12423	OG0005880Hg_chrom2_OP50_6695	OG0005880Hg_chrom2_PA3_12225	OG0005880Hg_chrom2_TN20_6379	OG0005880Hg_chrom2_TN22_12431	OG0005880Hg_chrom2_TN7_12413	OG0005880Hg_chrom2_TN8_6013	OG0005880chr9X12_45870
OG0005997	OG0011369Hg_chrom2_OP50_6781	OG0011369Hg_chrom2_PA3_12323	OG0011369Hg_chrom2_TN20_6466	OG0022351Hg_chrom1_TN10_8194	OG0022351Hg_chrom2_MM26_12565	OG0022351Hg_chrom2_TN22_6193	OG0022351Hg_chrom2_TN7_12516	OG0022351Hg_chrom2_TN8_6109	OG0022351chr9X12_45750
OG0005998	OG0004521Hg_chrom1_TN10_8190	OG0004521Hg_chrom2_MM26_12567	OG0004521Hg_chrom2_OP50_6784	OG0004521Hg_chrom2_PA3_12326	OG0004521Hg_chrom2_TN20_6469	OG0004521Hg_chrom2_TN22_6198	OG0004521Hg_chrom2_TN7_12519	OG0004521Hg_chrom2_TN8_6114	OG0004521chr9X12_45749
OG0006003	OG0001402Hg_chrom1_TN10_7980	OG0001402Hg_chrom2_MM26_12671	OG0001402Hg_chrom2_OP50_6872	OG0001402Hg_chrom2_PA3_12425	OG0001402Hg_chrom2_TN20_6556	OG0001402Hg_chrom2_TN22_6303	OG0001402chr9X12_45653	OG0012682Hg_chrom2_TN7_12636	OG0012682Hg_chrom2_TN8_6219
OG0006004	OG0001124Hg_chrom1_TN10_7978	OG0001124Hg_chrom2_MM26_12673	OG0001124Hg_chrom2_OP50_6875	OG0001124Hg_chrom2_PA3_12429	OG0001124Hg_chrom2_TN20_6564	OG0001124Hg_chrom2_TN22_6308	OG0001124Hg_chrom2_TN7_12642	OG0001124Hg_chrom2_TN8_6224	OG0001124chr9X12_45649
OG0006005	OG0007593Hg_chrom2_OP50_6887	OG0007593Hg_chrom2_TN20_6575	OG0009511Hg_chrom1_TN10_7959	OG0009511Hg_chrom2_MM26_12697	OG0009511Hg_chrom2_PA3_12446	OG0009511Hg_chrom2_TN22_6326	OG0009511Hg_chrom2_TN7_12663	OG0009511Hg_chrom2_TN8_6242	OG0009511chr9X12_45629
OG0006006	OG0010554Hg_chrom1_TN10_7958	OG0010554Hg_chrom2_MM26_12699	OG0010554Hg_chrom2_OP50_6891	OG0010554Hg_chrom2_PA3_12448	OG0010554Hg_chrom2_TN20_6577	OG0010554Hg_chrom2_TN7_12665	OG0010554Hg_chrom2_TN8_6247	OG0010554chr9X12_45626	OG0028678Hg_chrom2_TN22_6327
OG0006007	OG0001995Hg_chrom1_TN10_7952	OG0001995Hg_chrom2_MM26_12702	OG0001995Hg_chrom2_OP50_6894	OG0001995Hg_chrom2_PA3_12450	OG0001995Hg_chrom2_TN20_6581	OG0001995Hg_chrom2_TN22_6329	OG0001995Hg_chrom2_TN7_12668	OG0001995Hg_chrom2_TN8_6250	OG0001995chr9X12_45621
OG0006008	OG0005138Hg_chrom2_MM26_12758	OG0011674Hg_chrom2_OP50_6947	OG0011674Hg_chrom2_TN20_6623	OG0023818Hg_chrom1_TN10_7895	OG0023818Hg_chrom2_TN7_6009	OG0023818Hg_chrom2_TN8_6290	OG0023818chr9X12_45573	OG0029419Hg_chrom2_PA3_12478	OG0029419Hg_chrom2_TN22_6358
OG0006009	OG0000915Hg_chrom1_TN10_7889	OG0000915Hg_chrom2_PA3_12493	OG0000915Hg_chrom2_TN20_6628	OG0000915Hg_chrom2_TN22_6369	OG0000915Hg_chrom2_TN7_6015	OG0000915Hg_chrom2_TN8_6292	OG0000915chr9X12_45566	OG0037452Hg_chrom2_MM26_12767	OG0037452Hg_chrom2_OP50_6943
OG0006010	OG0001240Hg_chrom1_TN10_7886	OG0001240Hg_chrom2_MM26_12774	OG0001240Hg_chrom2_OP50_6933	OG0001240Hg_chrom2_PA3_12500	OG0001240Hg_chrom2_TN20_6635	OG0001240Hg_chrom2_TN22_6379	OG0001240Hg_chrom2_TN7_6024	OG0001240Hg_chrom2_TN8_6302	OG0001240chr9X12_45560
OG0006011	OG0014637Hg_chrom1_TN10_7883	OG0014637Hg_chrom2_MM26_12777	OG0014637Hg_chrom2_OP50_6931	OG0014637Hg_chrom2_PA3_12504	OG0014637Hg_chrom2_TN20_6638	OG0014637Hg_chrom2_TN22_6383	OG0014637Hg_chrom2_TN7_6027	OG0014637Hg_chrom2_TN8_6307	OG0014637chr9X12_45557
OG0006012	OG0014638Hg_chrom1_TN10_7881	OG0014638Hg_chrom2_MM26_12779	OG0014638Hg_chrom2_PA3_12505	OG0014638Hg_chrom2_TN22_6385	OG0014638Hg_chrom2_TN7_6029	OG0014638Hg_chrom2_TN8_6308	OG0014638chr9X12_45554	OG0038918Hg_chrom2_OP50_6928	OG0038918Hg_chrom2_TN20_6640
OG0006013	OG0001996Hg_chrom1_TN10_7873	OG0001996Hg_chrom2_MM26_12791	OG0001996Hg_chrom2_OP50_6963	OG0001996Hg_chrom2_PA3_12515	OG0001996Hg_chrom2_TN20_6647	OG0001996Hg_chrom2_TN22_6395	OG0001996Hg_chrom2_TN7_6036	OG0001996Hg_chrom2_TN8_6316	OG0001996chr9X12_45546
OG0006014	OG0006656Hg_chrom1_TN10_7866	OG0006656Hg_chrom2_MM26_12800	OG0006656Hg_chrom2_PA3_12521	OG0006656Hg_chrom2_TN20_6654	OG0006656Hg_chrom2_TN22_6402	OG0006656Hg_chrom2_TN7_6046	OG0006656Hg_chrom2_TN8_6326	OG0006656chr9X12_45537	OG0025757Hg_chrom2_OP50_6970
OG0006015	OG0004523Hg_chrom1_TN10_7863	OG0004523Hg_chrom2_MM26_12805	OG0004523Hg_chrom2_OP50_6972	OG0004523Hg_chrom2_PA3_12524	OG0004523Hg_chrom2_TN20_6658	OG0004523Hg_chrom2_TN22_6408	OG0004523Hg_chrom2_TN7_6050	OG0004523Hg_chrom2_TN8_6330	OG0004523chr9X12_45533
OG0006016	OG0002518Hg_chrom1_TN10_7861	OG0002518Hg_chrom2_MM26_12807	OG0002518Hg_chrom2_OP50_6974	OG0002518Hg_chrom2_PA3_12525	OG0002518Hg_chrom2_TN20_6661	OG0002518Hg_chrom2_TN22_6410	OG0002518Hg_chrom2_TN7_6052	OG0002518Hg_chrom2_TN8_6333	OG0002518chr9X12_45531
OG0006017	OG0010556Hg_chrom1_TN10_7858	OG0010556Hg_chrom2_OP50_6979	OG0010556Hg_chrom2_TN20_6664	OG0010556Hg_chrom2_TN8_6337	OG0022362Hg_chrom2_MM26_12813	OG0022362Hg_chrom2_PA3_12528	OG0022362Hg_chrom2_TN22_6415	OG0022362Hg_chrom2_TN7_6056	OG0022362chr9X12_45527
OG0006018	OG0014640Hg_chrom2_OP50_6981	OG0014640Hg_chrom2_TN20_6667	OG0016785Hg_chrom1_TN10_7853	OG0016785Hg_chrom2_MM26_12817	OG0016785Hg_chrom2_PA3_12533	OG0016785Hg_chrom2_TN22_6420	OG0016785Hg_chrom2_TN7_6061	OG0016785Hg_chrom2_TN8_6341	OG0016785chr9X12_45523
OG0006019	OG0008539Hg_chrom1_TN10_7850	OG0008539Hg_chrom2_MM26_12820	OG0008539Hg_chrom2_OP50_6986	OG0008539Hg_chrom2_PA3_12536	OG0008539Hg_chrom2_TN20_6673	OG0008539Hg_chrom2_TN7_6065	OG0008539Hg_chrom2_TN8_6344	OG0032819Hg_chrom2_TN22_6422	OG0032819chr9X12_45519
OG0006020	OG0016786Hg_chrom1_TN10_7847	OG0016786Hg_chrom2_MM26_12825	OG0016786Hg_chrom2_PA3_12541	OG0016786Hg_chrom2_TN20_6677	OG0016786Hg_chrom2_TN7_6068	OG0016786chr9X12_45516	OG0022363Hg_chrom2_OP50_6991	OG0036198Hg_chrom2_TN22_6426	OG0036198Hg_chrom2_TN8_6348
OG0006021	OG0011675Hg_chrom2_OP50_6992	OG0011675Hg_chrom2_TN20_6678	OG0011675chr9X12_45513	OG0024582Hg_chrom1_TN10_7844	OG0024582Hg_chrom2_MM26_12829	OG0024582Hg_chrom2_PA3_12544	OG0024582Hg_chrom2_TN22_6429	OG0024582Hg_chrom2_TN7_6071	OG0024582Hg_chrom2_TN8_6353
OG0006022	OG0001793Hg_chrom1_TN10_7840	OG0001793Hg_chrom2_OP50_6996	OG0001793Hg_chrom2_TN22_6433	OG0001793Hg_chrom2_TN7_6078	OG0001793Hg_chrom2_TN8_6361	OG0001793chr9X12_45508	OG0006657Hg_chrom2_MM26_12830	OG0006657Hg_chrom2_PA3_12547	OG0006657Hg_chrom2_TN20_6680
OG0006023	OG0013019Hg_chrom2_MM26_12838	OG0013019Hg_chrom2_OP50_6997	OG0013019Hg_chrom2_PA3_12552	OG0013019Hg_chrom2_TN20_6685	OG0013019Hg_chrom2_TN22_6438	OG0013019Hg_chrom2_TN7_6080	OG0013019Hg_chrom2_TN8_6362	OG0040849Hg_chrom1_TN10_7837	OG0040849chr9X12_45506
OG0006024	OG0014642Hg_chrom2_OP50_6999	OG0014642Hg_chrom2_PA3_12554	OG0014642Hg_chrom2_TN20_6688	OG0014642Hg_chrom2_TN8_6366	OG0032820Hg_chrom1_TN10_7833	OG0032820Hg_chrom2_MM26_12843	OG0032820chr9X12_45500	OG0042606Hg_chrom2_TN22_6442	OG0042606Hg_chrom2_TN7_6084
OG0006025	OG0005140Hg_chrom1_TN10_7829	OG0005140Hg_chrom2_MM26_12846	OG0005140Hg_chrom2_OP50_7000	OG0005140Hg_chrom2_PA3_12556	OG0005140Hg_chrom2_TN22_6444	OG0005140Hg_chrom2_TN7_6086	OG0005140Hg_chrom2_TN8_6368	OG0005140chr9X12_45495	OG0008540Hg_chrom2_TN20_6692
OG0006026	OG0000242Hg_chrom1_TN10_7823	OG0000242Hg_chrom2_MM26_12853	OG0000242Hg_chrom2_OP50_7005	OG0000242Hg_chrom2_PA3_12566	OG0000242Hg_chrom2_TN20_6696	OG0000242Hg_chrom2_TN22_6454	OG0000242Hg_chrom2_TN7_6095	OG0000242Hg_chrom2_TN8_6379	OG0000242chr9X12_45485
OG0006027	OG0002519Hg_chrom1_TN10_7814	OG0002519Hg_chrom2_MM26_12861	OG0002519Hg_chrom2_OP50_7014	OG0002519Hg_chrom2_PA3_12573	OG0002519Hg_chrom2_TN22_6461	OG0002519Hg_chrom2_TN7_6104	OG0002519chr9X12_45474	OG0009516Hg_chrom2_TN20_6702	OG0009516Hg_chrom2_TN8_6388
OG0006028	OG0003991Hg_chrom1_TN10_7804	OG0003991Hg_chrom2_MM26_12867	OG0003991Hg_chrom2_OP50_7020	OG0003991Hg_chrom2_PA3_12579	OG0003991Hg_chrom2_TN20_6708	OG0003991Hg_chrom2_TN22_6467	OG0003991Hg_chrom2_TN7_6114	OG0003991Hg_chrom2_TN8_6396	OG0003991chr9X12_45467
OG0006029	OG0014643Hg_chrom1_TN10_7799	OG0014643Hg_chrom2_TN20_6716	OG0019648Hg_chrom2_MM26_12876	OG0019648Hg_chrom2_OP50_7028	OG0019648Hg_chrom2_PA3_12585	OG0019648Hg_chrom2_TN22_6473	OG0019648Hg_chrom2_TN7_6121	OG0019648Hg_chrom2_TN8_6403	OG0019648chr9X12_45465
OG0006030	OG0011676Hg_chrom2_PA3_12586	OG0011676Hg_chrom2_TN20_6720	OG0014644Hg_chrom1_TN10_7794	OG0014644Hg_chrom2_MM26_12879	OG0014644Hg_chrom2_OP50_7032	OG0014644Hg_chrom2_TN22_6476	OG0014644Hg_chrom2_TN7_6124	OG0014644Hg_chrom2_TN8_6406	OG0014644chr9X12_45461
OG0006031	OG0003539Hg_chrom1_TN10_7788	OG0003539Hg_chrom2_MM26_12885	OG0003539Hg_chrom2_OP50_7038	OG0003539Hg_chrom2_PA3_12594	OG0003539Hg_chrom2_TN20_6723	OG0003539Hg_chrom2_TN22_6481	OG0003539Hg_chrom2_TN7_6129	OG0003539chr9X12_45452	OG0034113Hg_chrom2_TN8_6413
OG0006032	OG0008541Hg_chrom1_TN10_7783	OG0008541Hg_chrom2_MM26_12889	OG0008541Hg_chrom2_OP50_7044	OG0008541Hg_chrom2_PA3_12598	OG0008541Hg_chrom2_TN20_6730	OG0008541Hg_chrom2_TN22_6489	OG0008541Hg_chrom2_TN7_6133	OG0008541Hg_chrom2_TN8_6417	chr9X12_45448
OG0006033	OG0002227Hg_chrom1_TN10_7781	OG0002227Hg_chrom2_MM26_12894	OG0002227Hg_chrom2_OP50_7046	OG0002227Hg_chrom2_PA3_12601	OG0002227Hg_chrom2_TN20_6731	OG0002227Hg_chrom2_TN22_6491	OG0002227Hg_chrom2_TN7_6141	OG0002227Hg_chrom2_TN8_6425	OG0002227chr9X12_45445
OG0006034	OG0006658Hg_chrom1_TN10_7775	OG0006658Hg_chrom2_MM26_12899	OG0006658Hg_chrom2_PA3_12606	OG0006658Hg_chrom2_TN20_6737	OG0019041Hg_chrom2_OP50_7049	OG0019041Hg_chrom2_TN22_6494	OG0019041Hg_chrom2_TN7_6143	OG0019041Hg_chrom2_TN8_6427	OG0019041chr9X12_45440
OG0006035	Hg_chrom1_TN10_7769	OG0011677Hg_chrom2_TN20_6742	OG0019651Hg_chrom2_PA3_12612	OG0019651chr9X12_45435	OG0029425Hg_chrom2_MM26_12903	OG0029425Hg_chrom2_OP50_7055	OG0029425Hg_chrom2_TN8_6433	OG0042607Hg_chrom2_TN22_6498	OG0042607Hg_chrom2_TN7_6149
OG0006036	Hg_chrom2_TN7_6155	OG0010558Hg_chrom1_TN10_7765	OG0010558Hg_chrom2_MM26_12908	OG0010558Hg_chrom2_OP50_7059	OG0010558Hg_chrom2_PA3_12615	OG0010558Hg_chrom2_TN20_6745	OG0010558Hg_chrom2_TN22_6503	OG0010558Hg_chrom2_TN8_6438	OG0010558chr9X12_45429
OG0006037	OG0002228Hg_chrom1_TN10_7763	OG0002228Hg_chrom2_MM26_12913	OG0002228Hg_chrom2_OP50_7061	OG0002228Hg_chrom2_PA3_12620	OG0002228Hg_chrom2_TN20_6746	OG0002228Hg_chrom2_TN22_6508	OG0002228Hg_chrom2_TN7_6160	OG0002228Hg_chrom2_TN8_6444	OG0002228chr9X12_45426
OG0006038	OG0000725Hg_chrom1_TN10_7753	OG0000725Hg_chrom2_MM26_12920	OG0000725Hg_chrom2_OP50_7065	OG0000725Hg_chrom2_PA3_12626	OG0000725Hg_chrom2_TN20_6753	OG0000725Hg_chrom2_TN22_6512	OG0000725Hg_chrom2_TN7_6166	OG0000725Hg_chrom2_TN8_6449	OG0000725chr9X12_45416
OG0006039	Hg_chrom2_OP50_7073	Hg_chrom2_PA3_12631	OG0005887Hg_chrom1_TN10_7752	OG0005887Hg_chrom2_MM26_12922	OG0005887Hg_chrom2_TN20_6757	OG0005887Hg_chrom2_TN22_6518	OG0005887Hg_chrom2_TN7_6171	OG0005887Hg_chrom2_TN8_6453	OG0005887chr9X12_45411
OG0006041	OG0005889Hg_chrom1_TN10_7739	OG0005889Hg_chrom2_MM26_12937	OG0005889Hg_chrom2_OP50_7084	OG0005889Hg_chrom2_PA3_12644	OG0005889Hg_chrom2_TN20_6767	OG0005889Hg_chrom2_TN22_6532	OG0005889Hg_chrom2_TN7_6189	OG0005889Hg_chrom2_TN8_6472	OG0022365chr9X12_45397
OG0006042	OG0003540Hg_chrom1_TN10_7720	OG0003540Hg_chrom2_MM26_12950	OG0003540Hg_chrom2_OP50_7095	OG0003540Hg_chrom2_PA3_12656	OG0003540Hg_chrom2_TN20_6780	OG0003540Hg_chrom2_TN22_6539	OG0003540Hg_chrom2_TN7_6202	OG0003540Hg_chrom2_TN8_6483	OG0003540chr9X12_45379
OG0006043	OG0009517Hg_chrom2_TN20_6786	OG0009517Hg_chrom2_TN8_6487	OG0009517chr9X12_45371	OG0014648Hg_chrom1_TN10_7715	OG0014648Hg_chrom2_OP50_7099	OG0014648Hg_chrom2_PA3_12664	OG0014648Hg_chrom2_TN22_6545	OG0014648Hg_chrom2_TN7_6209	OG0032822Hg_chrom2_MM26_12955
OG0006044	OG0005142Hg_chrom1_TN10_7711	OG0005142Hg_chrom2_MM26_12961	OG0005142Hg_chrom2_OP50_7102	OG0005142Hg_chrom2_PA3_12661	OG0005142Hg_chrom2_TN20_6790	OG0005142Hg_chrom2_TN22_6542	OG0005142Hg_chrom2_TN7_6214	OG0005142Hg_chrom2_TN8_6492	OG0005142chr9X12_45368
OG0006045	OG0006660Hg_chrom1_TN10_7709	OG0006660Hg_chrom2_MM26_12963	OG0006660Hg_chrom2_OP50_7108	OG0006660Hg_chrom2_PA3_12669	OG0006660Hg_chrom2_TN20_6797	OG0006660Hg_chrom2_TN22_6551	OG0006660Hg_chrom2_TN7_6216	OG0006660Hg_chrom2_TN8_6497	OG0006660chr9X12_45366
OG0006049	OG0005143Hg_chrom2_TN7_6302	OG0014654Hg_chrom1_TN10_7592	OG0014654Hg_chrom2_MM26_13057	OG0014654Hg_chrom2_OP50_7183	OG0014654Hg_chrom2_PA3_12748	OG0014654Hg_chrom2_TN20_6867	OG0014654Hg_chrom2_TN22_6632	OG0014654Hg_chrom2_TN8_6583	OG0014654chr9X12_45222
OG0006050	OG0008544Hg_chrom1_TN10_7583	OG0008544Hg_chrom2_MM26_13068	OG0008544Hg_chrom2_OP50_7192	OG0008544Hg_chrom2_PA3_12756	OG0008544Hg_chrom2_TN20_6875	OG0008544Hg_chrom2_TN22_6640	OG0008544Hg_chrom2_TN7_6314	OG0008544Hg_chrom2_TN8_6591	OG0008544chr9X12_45212
OG0006051	OG0004526Hg_chrom1_TN10_7578	OG0004526Hg_chrom2_MM26_13071	OG0004526Hg_chrom2_OP50_7195	OG0004526Hg_chrom2_PA3_12762	OG0004526Hg_chrom2_TN20_6882	OG0004526Hg_chrom2_TN22_6647	OG0004526chr9X12_45208	OG0014655Hg_chrom2_TN7_6319	OG0014655Hg_chrom2_TN8_6598
OG0006052	OG0014656Hg_chrom1_TN10_7577	OG0014656Hg_chrom2_MM26_13074	OG0014656Hg_chrom2_OP50_7198	OG0014656Hg_chrom2_PA3_12764	OG0014656Hg_chrom2_TN20_6884	OG0014656Hg_chrom2_TN22_6651	OG0014656Hg_chrom2_TN7_6322	OG0014656Hg_chrom2_TN8_6601	OG0014656chr9X12_45207
OG0006053	Hg_chrom2_TN22_6653	Hg_chrom2_TN7_6327	OG0002231Hg_chrom1_TN10_7572	OG0002231Hg_chrom2_MM26_13078	OG0002231Hg_chrom2_OP50_7199	OG0002231Hg_chrom2_PA3_12768	OG0002231Hg_chrom2_TN20_6891	OG0002231Hg_chrom2_TN8_6605	OG0002231chr9X12_45202
OG0006055	OG0016804Hg_chrom1_TN10_7550	OG0016804Hg_chrom2_OP50_7215	OG0016804Hg_chrom2_TN20_6905	OG0016804Hg_chrom2_TN8_6624	OG0026859Hg_chrom2_MM26_13110	OG0026859Hg_chrom2_PA3_12787	OG0026859Hg_chrom2_TN22_6672	OG0026859Hg_chrom2_TN7_6355	OG0026859chr9X12_45182
OG0006056	OG0016805Hg_chrom1_TN10_7549	OG0016805Hg_chrom2_MM26_13112	OG0016805Hg_chrom2_OP50_7217	OG0016805Hg_chrom2_PA3_12789	OG0016805Hg_chrom2_TN20_6906	OG0016805Hg_chrom2_TN22_6674	OG0016805Hg_chrom2_TN7_6357	OG0016805Hg_chrom2_TN8_6627	OG0016805chr9X12_45181
OG0006057	OG0016806Hg_chrom1_TN10_7548	OG0016806Hg_chrom2_MM26_13113	OG0016806Hg_chrom2_OP50_7218	OG0016806Hg_chrom2_PA3_12790	OG0016806Hg_chrom2_TN20_6907	OG0016806Hg_chrom2_TN22_6675	OG0016806Hg_chrom2_TN7_6358	OG0016806Hg_chrom2_TN8_6628	OG0016806chr9X12_45180
OG0006058	Hg_chrom2_TN7_6362	OG0001794Hg_chrom1_TN10_7545	OG0001794Hg_chrom2_MM26_13119	OG0001794Hg_chrom2_OP50_7221	OG0001794Hg_chrom2_PA3_12795	OG0001794Hg_chrom2_TN20_6909	OG0001794Hg_chrom2_TN22_6678	OG0001794Hg_chrom2_TN8_6631	OG0001794chr9X12_45175
OG0006059	OG0006663Hg_chrom1_TN10_7541	OG0006663Hg_chrom2_MM26_13122	OG0006663Hg_chrom2_OP50_7226	OG0006663Hg_chrom2_PA3_12798	OG0006663Hg_chrom2_TN20_6913	OG0006663Hg_chrom2_TN22_6684	OG0006663Hg_chrom2_TN7_6367	OG0006663Hg_chrom2_TN8_6637	OG0006663chr9X12_45172
OG0006060	Hg_chrom2_PA3_12803	OG0003541Hg_chrom1_TN10_7534	OG0003541Hg_chrom2_MM26_13129	OG0003541Hg_chrom2_OP50_7232	OG0003541Hg_chrom2_TN20_6920	OG0003541Hg_chrom2_TN22_6690	OG0003541Hg_chrom2_TN7_6373	OG0003541Hg_chrom2_TN8_6643	OG0003541chr9X12_45165
OG0006061	OG0007601Hg_chrom1_TN10_7521	OG0007601Hg_chrom2_MM26_13144	OG0007601Hg_chrom2_OP50_7250	OG0007601Hg_chrom2_PA3_12815	OG0007601Hg_chrom2_TN20_6933	OG0007601Hg_chrom2_TN22_6702	OG0007601Hg_chrom2_TN7_6384	OG0007601Hg_chrom2_TN8_6655	OG0007601chr9X12_45151
OG0006062	OG0003996Hg_chrom2_OP50_7256	OG0003996Hg_chrom2_TN22_6708	OG0003996Hg_chrom2_TN7_6390	OG0003996Hg_chrom2_TN8_6661	OG0003996chr9X12_45149	OG0022373Hg_chrom1_TN10_7515	OG0022373Hg_chrom2_MM26_13152	OG0022373Hg_chrom2_PA3_12822	OG0022373Hg_chrom2_TN20_6937
OG0006063	OG0013024Hg_chrom1_TN10_7514	OG0013024Hg_chrom2_MM26_13155	OG0013024Hg_chrom2_OP50_7257	OG0013024Hg_chrom2_PA3_12825	OG0013024Hg_chrom2_TN20_6939	OG0013024Hg_chrom2_TN22_6712	OG0013024Hg_chrom2_TN7_6394	OG0013024Hg_chrom2_TN8_6664	OG0013024chr9X12_45148
OG0006064	OG0016809Hg_chrom1_TN10_14125	OG0016809Hg_chrom2_MM26_13186	OG0016809Hg_chrom2_OP50_7278	OG0016809Hg_chrom2_PA3_12856	OG0016809Hg_chrom2_TN20_6960	OG0016809Hg_chrom2_TN22_6746	OG0016809Hg_chrom2_TN7_6420	OG0016809Hg_chrom2_TN8_6686	OG0016809chr9X12_45120
OG0006065	OG0016810Hg_chrom1_TN10_14120	OG0016810Hg_chrom2_OP50_7281	OG0016810Hg_chrom2_TN7_6424	OG0016810Hg_chrom2_TN8_6690	OG0016810chr9X12_45115	OG0025759Hg_chrom2_PA3_12847	OG0025759Hg_chrom2_TN22_6736	OG0032832Hg_chrom2_MM26_13189	OG0032832Hg_chrom2_TN20_6964
OG0006066	Hg_chrom2_OP50_7287	OG0016811Hg_chrom1_TN10_14124	OG0016811Hg_chrom2_MM26_13193	OG0016811Hg_chrom2_PA3_12858	OG0016811Hg_chrom2_TN20_6969	OG0016811Hg_chrom2_TN22_6749	OG0016811Hg_chrom2_TN7_6433	OG0016811Hg_chrom2_TN8_6695	chr9X12_45110
OG0006067	OG0009523Hg_chrom1_TN10_14099	OG0009523Hg_chrom2_MM26_13209	OG0009523Hg_chrom2_OP50_7301	OG0009523chr9X12_45094	OG0026050Hg_chrom2_PA3_12872	OG0026050Hg_chrom2_TN20_6978	OG0026050Hg_chrom2_TN22_6759	OG0026050Hg_chrom2_TN7_6444	OG0026050Hg_chrom2_TN8_6706
OG0006068	OG0008546Hg_chrom1_TN10_14094	OG0008546Hg_chrom2_MM26_13215	OG0008546Hg_chrom2_OP50_7304	OG0008546Hg_chrom2_PA3_12877	OG0008546Hg_chrom2_TN20_6985	OG0008546Hg_chrom2_TN22_6764	OG0008546Hg_chrom2_TN7_6453	OG0008546Hg_chrom2_TN8_6713	chr9X12_45092
OG0006069	OG0014660Hg_chrom2_MM26_13217	OG0014660Hg_chrom2_OP50_7308	OG0014660Hg_chrom2_TN20_6990	OG0026051Hg_chrom1_TN10_14092	OG0026051Hg_chrom2_PA3_12883	OG0026051Hg_chrom2_TN22_6767	OG0026051Hg_chrom2_TN7_6456	OG0026051Hg_chrom2_TN8_6715	OG0026051chr9X12_45088
OG0006070	OG0003151Hg_chrom1_TN10_14089	OG0003151Hg_chrom2_MM26_13220	OG0003151Hg_chrom2_OP50_7309	OG0003151Hg_chrom2_PA3_12885	OG0003151Hg_chrom2_TN20_6987	OG0003151Hg_chrom2_TN22_6770	OG0003151Hg_chrom2_TN7_6458	OG0003151Hg_chrom2_TN8_6718	OG0003151chr9X12_45086
OG0006071	OG0005147Hg_chrom1_TN10_14088	OG0005147Hg_chrom2_MM26_13222	OG0005147Hg_chrom2_OP50_7310	OG0005147Hg_chrom2_PA3_12887	OG0005147Hg_chrom2_TN20_6991	OG0005147Hg_chrom2_TN22_6772	OG0005147Hg_chrom2_TN8_6720	OG0005147chr9X12_45084	OG0036202Hg_chrom2_TN7_6460
OG0006072	OG0014661Hg_chrom1_TN10_14086	OG0014661Hg_chrom2_MM26_13226	OG0014661Hg_chrom2_OP50_7315	OG0014661Hg_chrom2_PA3_12890	OG0014661Hg_chrom2_TN20_6995	OG0014661Hg_chrom2_TN22_6776	OG0014661Hg_chrom2_TN7_6464	OG0014661Hg_chrom2_TN8_6724	OG0014661chr9X12_45079
OG0006073	OG0016814Hg_chrom1_TN10_14084	OG0016814Hg_chrom2_OP50_7317	OG0016814Hg_chrom2_TN20_6997	OG0016814chr9X12_45075	OG0022376Hg_chrom2_MM26_13230	OG0022376Hg_chrom2_PA3_12894	OG0022376Hg_chrom2_TN22_6779	OG0022376Hg_chrom2_TN7_6467	OG0022376Hg_chrom2_TN8_6728
OG0006074	Hg_chrom2_OP50_7328	OG0005895Hg_chrom1_TN10_14069	OG0005895Hg_chrom2_MM26_13258	OG0005895Hg_chrom2_PA3_12916	OG0005895Hg_chrom2_TN20_7014	OG0005895Hg_chrom2_TN22_6805	OG0005895chr9X12_45060	OG0036204Hg_chrom2_TN7_6488	OG0036204Hg_chrom2_TN8_6755
OG0006075	OG0000308Hg_chrom2_OP50_7335	OG0000308Hg_chrom2_TN20_7018	OG0009524Hg_chrom1_TN10_14060	OG0009524Hg_chrom2_MM26_13263	OG0009524Hg_chrom2_PA3_12920	OG0009524Hg_chrom2_TN22_6810	OG0009524Hg_chrom2_TN7_6492	OG0009524Hg_chrom2_TN8_6759	OG0009524chr9X12_45051
OG0006076	Hg_chrom2_TN8_6774	OG0009525Hg_chrom1_TN10_14048	OG0009525Hg_chrom2_MM26_13279	OG0009525Hg_chrom2_OP50_7348	OG0009525Hg_chrom2_PA3_12933	OG0009525Hg_chrom2_TN20_7031	OG0009525Hg_chrom2_TN22_6826	OG0009525Hg_chrom2_TN7_6507	OG0009525chr9X12_45040
OG0006077	OG0014664Hg_chrom1_TN10_14047	OG0014664Hg_chrom2_MM26_13280	OG0014664Hg_chrom2_OP50_7349	OG0014664Hg_chrom2_PA3_12939	OG0014664Hg_chrom2_TN20_7033	OG0014664Hg_chrom2_TN22_6834	OG0014664Hg_chrom2_TN7_6508	OG0014664Hg_chrom2_TN8_6777	chr9X12_45039
OG0006078	OG0003152Hg_chrom1_TN10_14043	OG0003152Hg_chrom2_MM26_13284	OG0003152Hg_chrom2_OP50_7353	OG0003152Hg_chrom2_PA3_12934	OG0003152Hg_chrom2_TN20_7036	OG0003152Hg_chrom2_TN22_6828	OG0003152Hg_chrom2_TN7_6515	OG0003152Hg_chrom2_TN8_6780	OG0003152chr9X12_45034
OG0006079	OG0008549Hg_chrom1_TN10_14037	OG0008549Hg_chrom2_MM26_13287	OG0008549Hg_chrom2_OP50_7355	OG0008549Hg_chrom2_PA3_12944	OG0008549Hg_chrom2_TN20_7038	OG0008549Hg_chrom2_TN22_6838	OG0008549Hg_chrom2_TN7_6521	OG0008549Hg_chrom2_TN8_6788	OG0008549chr9X12_45029
OG0006080	OG0003543Hg_chrom1_TN10_14034	OG0003543Hg_chrom2_MM26_13292	OG0003543Hg_chrom2_OP50_7356	OG0003543Hg_chrom2_PA3_12949	OG0003543Hg_chrom2_TN20_7039	OG0003543Hg_chrom2_TN22_6840	OG0003543Hg_chrom2_TN7_6523	OG0003543Hg_chrom2_TN8_6790	OG0003543chr9X12_45027
OG0006081	OG0003153Hg_chrom1_TN10_14031	OG0003153Hg_chrom2_MM26_13294	OG0003153Hg_chrom2_OP50_7358	OG0003153Hg_chrom2_PA3_12951	OG0003153Hg_chrom2_TN20_7041	OG0003153Hg_chrom2_TN22_6843	OG0003153Hg_chrom2_TN7_6526	OG0003153Hg_chrom2_TN8_6793	OG0003153chr9X12_45024
OG0006082	OG0000521Hg_chrom1_TN10_14002	OG0000521Hg_chrom2_MM26_13318	OG0000521Hg_chrom2_OP50_7372	OG0000521Hg_chrom2_PA3_12977	OG0000521Hg_chrom2_TN20_7061	OG0000521Hg_chrom2_TN22_6862	OG0000521Hg_chrom2_TN7_6566	OG0000521Hg_chrom2_TN8_6811	OG0000521chr9X12_44995
OG0006083	OG0016820Hg_chrom1_TN10_13998	OG0016820Hg_chrom2_MM26_13322	OG0016820Hg_chrom2_OP50_7376	OG0016820Hg_chrom2_PA3_12983	OG0016820Hg_chrom2_TN20_7065	OG0016820Hg_chrom2_TN22_6867	OG0016820Hg_chrom2_TN7_6571	OG0016820Hg_chrom2_TN8_6817	OG0016820chr9X12_44990
OG0006084	OG0008551Hg_chrom2_MM26_13327	OG0008551Hg_chrom2_TN20_7069	OG0008551Hg_chrom2_TN22_6872	OG0025761Hg_chrom1_TN10_13996	OG0025761Hg_chrom2_OP50_7378	OG0025761Hg_chrom2_PA3_12986	OG0025761Hg_chrom2_TN7_6574	OG0025761Hg_chrom2_TN8_6820	OG0025761chr9X12_44987
OG0006085	OG0006665Hg_chrom1_TN10_13994	OG0006665Hg_chrom2_MM26_13330	OG0006665Hg_chrom2_OP50_7380	OG0006665Hg_chrom2_PA3_12989	OG0006665Hg_chrom2_TN20_7075	OG0006665Hg_chrom2_TN22_6874	OG0006665Hg_chrom2_TN7_6578	OG0006665Hg_chrom2_TN8_6824	OG0006665chr9X12_44986
OG0006086	OG0016822Hg_chrom1_TN10_13991	OG0016822Hg_chrom2_OP50_7381	OG0016822Hg_chrom2_PA3_12991	OG0019675Hg_chrom2_MM26_13334	OG0019675Hg_chrom2_TN22_6879	OG0019675Hg_chrom2_TN7_6581	OG0019675Hg_chrom2_TN8_6828	OG0019675chr9X12_44983	OG0026864Hg_chrom2_TN20_7072
OG0006087	OG0005897Hg_chrom1_TN10_13985	OG0005897Hg_chrom2_MM26_13341	OG0005897Hg_chrom2_OP50_7385	OG0005897Hg_chrom2_TN20_7077	OG0005897Hg_chrom2_TN22_6888	OG0005897Hg_chrom2_TN7_6589	OG0005897Hg_chrom2_TN8_6837	OG0005897chr9X12_44973	OG0022384Hg_chrom2_PA3_12999
OG0006088	Hg_chrom2_OP50_7392	OG0016823Hg_chrom1_TN10_13980	OG0016823Hg_chrom2_MM26_13347	OG0016823Hg_chrom2_PA3_13004	OG0016823Hg_chrom2_TN20_7080	OG0016823Hg_chrom2_TN22_6894	OG0016823Hg_chrom2_TN7_6595	OG0016823Hg_chrom2_TN8_6840	OG0016823chr9X12_44968
OG0006089	OG0003154Hg_chrom2_OP50_7399	OG0003154Hg_chrom2_TN22_6904	OG0010563Hg_chrom1_TN10_13968	OG0010563Hg_chrom2_PA3_13013	OG0010563Hg_chrom2_TN20_7089	OG0010563Hg_chrom2_TN7_6605	OG0010563chr9X12_44959	OG0026865Hg_chrom2_MM26_13357	OG0026865Hg_chrom2_TN8_6853
OG0006090	Hg_chrom1_TN10_13953	OG0006666Hg_chrom2_OP50_7409	OG0006666Hg_chrom2_TN20_7101	OG0013031Hg_chrom2_MM26_13375	OG0013031Hg_chrom2_PA3_13030	OG0013031Hg_chrom2_TN22_6920	OG0013031Hg_chrom2_TN7_6623	OG0013031Hg_chrom2_TN8_6872	OG0013031chr9X12_44944
OG0006091	Hg_chrom2_TN20_7143	OG0010566Hg_chrom2_MM26_13432	OG0010566chr9X12_44867	OG0013035Hg_chrom1_TN10_13887	OG0013035Hg_chrom2_OP50_7446	OG0013035Hg_chrom2_PA3_13084	OG0036209Hg_chrom2_TN22_6980	OG0036209Hg_chrom2_TN7_6682	OG0036209Hg_chrom2_TN8_6933
OG0006092	OG0003545Hg_chrom2_OP50_7450	OG0013036Hg_chrom2_TN20_7146	OG0022387Hg_chrom1_TN10_13884	OG0022387Hg_chrom2_MM26_13437	OG0022387Hg_chrom2_TN22_6987	OG0022387Hg_chrom2_TN7_6688	OG0022387Hg_chrom2_TN8_6937	OG0029436Hg_chrom2_PA3_13090	OG0029436chr9X12_44858
OG0006093	OG0003999Hg_chrom1_TN10_13880	OG0003999Hg_chrom2_MM26_13442	OG0003999Hg_chrom2_OP50_7453	OG0003999Hg_chrom2_PA3_13094	OG0003999Hg_chrom2_TN20_7149	OG0003999Hg_chrom2_TN22_6990	OG0003999Hg_chrom2_TN7_6693	OG0003999Hg_chrom2_TN8_6942	OG0003999chr9X12_44854
OG0006094	OG0011682Hg_chrom1_TN10_13876	OG0011682Hg_chrom2_MM26_13447	OG0011682Hg_chrom2_OP50_7454	OG0011682Hg_chrom2_PA3_13101	OG0011682Hg_chrom2_TN20_7152	OG0011682Hg_chrom2_TN22_6996	OG0011682Hg_chrom2_TN7_6697	OG0011682Hg_chrom2_TN8_6947	OG0011682chr9X12_44848
OG0006095	OG0004000Hg_chrom1_TN10_13864	OG0004000Hg_chrom2_MM26_13462	OG0004000Hg_chrom2_OP50_7466	OG0004000Hg_chrom2_PA3_13115	OG0004000Hg_chrom2_TN20_7164	OG0004000Hg_chrom2_TN22_7010	OG0004000Hg_chrom2_TN7_6710	OG0004000chr9X12_44835	OG0032137Hg_chrom2_TN8_6963
OG0006096	Hg_chrom2_OP50_7487	OG0010567Hg_chrom2_MM26_13472	OG0010567Hg_chrom2_PA3_13124	OG0010567Hg_chrom2_TN20_7172	OG0021994Hg_chrom2_TN22_7021	OG0021994Hg_chrom2_TN7_6722	OG0021994Hg_chrom2_TN8_6973	OG0040830chr9X12_44822	OG0040831Hg_chrom1_TN10_13852
OG0006097	OG0014672Hg_chrom2_OP50_7492	OG0016246Hg_chrom1_TN10_13841	OG0016246Hg_chrom2_PA3_13129	OG0016246Hg_chrom2_TN20_7179	OG0016246Hg_chrom2_TN22_7025	OG0016246Hg_chrom2_TN8_6977	OG0016246chr9X12_44814	OG0037471Hg_chrom2_MM26_13476	OG0037471Hg_chrom2_TN7_6726
OG0006098	OG0010568Hg_chrom2_OP50_7502	OG0010568Hg_chrom2_TN20_7188	OG0013037Hg_chrom1_TN10_13825	OG0013037Hg_chrom2_MM26_13489	OG0013037Hg_chrom2_PA3_13144	OG0013037Hg_chrom2_TN22_7038	OG0013037Hg_chrom2_TN7_6745	OG0013037Hg_chrom2_TN8_6992	OG0013037chr9X12_44799
OG0006099	OG0016836Hg_chrom1_TN10_13818	OG0016836Hg_chrom2_MM26_13492	OG0016836Hg_chrom2_OP50_7504	OG0016836Hg_chrom2_TN22_7040	OG0016836Hg_chrom2_TN7_6748	OG0016836Hg_chrom2_TN8_6994	OG0019686Hg_chrom2_PA3_13146	OG0019686Hg_chrom2_TN20_7191	OG0019686chr9X12_44797
OG0006100	OG0003155Hg_chrom1_TN10_13807	OG0003155Hg_chrom2_MM26_13502	OG0003155Hg_chrom2_OP50_7515	OG0003155Hg_chrom2_PA3_6703	OG0003155Hg_chrom2_TN20_7199	OG0003155Hg_chrom2_TN22_7050	OG0003155Hg_chrom2_TN7_6756	OG0003155Hg_chrom2_TN8_7001	OG0003155chr9X12_44786
OG0006101	Hg_chrom2_MM26_13505	OG0010569Hg_chrom1_TN10_13805	OG0010569Hg_chrom2_OP50_7516	OG0010569Hg_chrom2_PA3_6706	OG0010569Hg_chrom2_TN20_7200	OG0010569Hg_chrom2_TN22_7055	OG0010569Hg_chrom2_TN7_6762	OG0010569Hg_chrom2_TN8_7006	OG0010569chr9X12_44784
OG0006102	Hg_chrom2_TN7_6766	OG0002524Hg_chrom1_TN10_13802	OG0002524Hg_chrom2_MM26_13507	OG0002524Hg_chrom2_OP50_7520	OG0002524Hg_chrom2_PA3_6707	OG0002524Hg_chrom2_TN20_7201	OG0002524Hg_chrom2_TN22_7057	OG0002524Hg_chrom2_TN8_7007	OG0002524chr9X12_44782
OG0006103	OG0010570Hg_chrom1_TN10_13798	OG0010570Hg_chrom2_MM26_13512	OG0010570Hg_chrom2_PA3_6711	OG0010570Hg_chrom2_TN20_7204	OG0032840chr9X12_44777	OG0038929Hg_chrom2_OP50_7523	OG0038929Hg_chrom2_TN7_6769	OG0042612Hg_chrom2_TN22_7060	OG0042612Hg_chrom2_TN8_7011
OG0006104	OG0003156Hg_chrom1_TN10_13795	OG0003156Hg_chrom2_MM26_13516	OG0003156Hg_chrom2_OP50_7528	OG0003156Hg_chrom2_PA3_6714	OG0003156Hg_chrom2_TN20_7205	OG0003156Hg_chrom2_TN22_7062	OG0003156Hg_chrom2_TN7_6772	OG0003156Hg_chrom2_TN8_7013	OG0003156chr9X12_44772
OG0006105	OG0016839Hg_chrom1_TN10_13793	OG0016839Hg_chrom2_MM26_13519	OG0016839Hg_chrom2_OP50_7529	OG0016839Hg_chrom2_PA3_6716	OG0016839Hg_chrom2_TN20_7207	OG0016839Hg_chrom2_TN22_7064	OG0016839Hg_chrom2_TN7_6774	OG0016839Hg_chrom2_TN8_7015	OG0016839chr9X12_44769
OG0006106	OG0009530Hg_chrom1_TN10_13791	OG0009530Hg_chrom2_MM26_13521	OG0009530chr9X12_44766	OG0010571Hg_chrom2_OP50_7534	OG0010571Hg_chrom2_PA3_6718	OG0010571Hg_chrom2_TN20_7210	OG0010571Hg_chrom2_TN22_7068	OG0010571Hg_chrom2_TN7_6778	OG0010571Hg_chrom2_TN8_7019
OG0006107	OG0005899Hg_chrom1_TN10_13784	OG0005899Hg_chrom2_MM26_13528	OG0005899Hg_chrom2_OP50_7536	OG0005899Hg_chrom2_PA3_6724	OG0005899Hg_chrom2_TN20_7214	OG0005899Hg_chrom2_TN22_7072	OG0005899Hg_chrom2_TN7_6783	OG0005899Hg_chrom2_TN8_7022	OG0005899chr9X12_44759
OG0006108	OG0016840Hg_chrom1_TN10_13782	OG0016840Hg_chrom2_MM26_13532	OG0016840Hg_chrom2_OP50_7540	OG0016840Hg_chrom2_PA3_6728	OG0016840Hg_chrom2_TN20_7216	OG0016840Hg_chrom2_TN22_7075	OG0016840Hg_chrom2_TN7_6786	OG0016840Hg_chrom2_TN8_7026	OG0016840chr9X12_44755
OG0006109	OG0006668Hg_chrom2_OP50_7542	OG0006668Hg_chrom2_PA3_6730	OG0006668Hg_chrom2_TN22_7078	OG0006668Hg_chrom2_TN7_6789	OG0011684Hg_chrom2_MM26_13535	OG0011684Hg_chrom2_TN20_7219	OG0011684Hg_chrom2_TN8_7031	OG0011684chr9X12_44752	OG0016841Hg_chrom1_TN10_13779
OG0006110	OG0002233Hg_chrom1_TN10_13776	OG0002233Hg_chrom2_MM26_13541	OG0002233Hg_chrom2_OP50_7549	OG0002233Hg_chrom2_PA3_6737	OG0002233Hg_chrom2_TN20_7225	OG0002233Hg_chrom2_TN22_7085	OG0002233Hg_chrom2_TN7_6796	OG0002233Hg_chrom2_TN8_7035	OG0002233chr9X12_44745
OG0006111	Hg_chrom2_TN7_6827	OG0008556Hg_chrom1_TN10_13744	OG0008556Hg_chrom2_MM26_13567	OG0008556Hg_chrom2_OP50_7571	OG0008556Hg_chrom2_PA3_6753	OG0008556Hg_chrom2_TN20_7244	OG0008556Hg_chrom2_TN22_7097	OG0008556Hg_chrom2_TN8_7054	OG0008556chr9X12_44722
OG0006112	OG0009532Hg_chrom1_TN10_13707	OG0009532Hg_chrom2_MM26_13602	OG0009532Hg_chrom2_OP50_7596	OG0009532Hg_chrom2_PA3_6779	OG0009532Hg_chrom2_TN20_7268	OG0009532Hg_chrom2_TN22_7123	OG0009532Hg_chrom2_TN7_6851	OG0009532Hg_chrom2_TN8_7077	OG0009532chr9X12_44693
OG0006113	OG0000243Hg_chrom1_TN10_13701	OG0000243Hg_chrom2_MM26_13609	OG0000243Hg_chrom2_OP50_7600	OG0000243Hg_chrom2_PA3_6786	OG0000243Hg_chrom2_TN20_7277	OG0000243Hg_chrom2_TN22_7126	OG0000243Hg_chrom2_TN7_6856	OG0000243Hg_chrom2_TN8_7082	OG0000243chr9X12_44683
OG0006114	OG0001126Hg_chrom1_TN10_13696	OG0001126Hg_chrom2_MM26_13615	OG0001126Hg_chrom2_OP50_7609	OG0001126Hg_chrom2_PA3_6790	OG0001126Hg_chrom2_TN20_7284	OG0001126Hg_chrom2_TN22_7130	OG0001126Hg_chrom2_TN7_6859	OG0001126Hg_chrom2_TN8_7084	OG0001126chr9X12_44677
OG0006115	OG0003546Hg_chrom1_TN10_13695	OG0003546Hg_chrom2_PA3_6795	OG0019691chr9X12_44670	OG0032847Hg_chrom2_MM26_13619	OG0032847Hg_chrom2_TN22_7134	OG0032847Hg_chrom2_TN8_7088	OG0038930Hg_chrom2_OP50_7610	OG0038930Hg_chrom2_TN20_7286	OG0039884Hg_chrom2_TN7_6863
OG0006116	OG0011686Hg_chrom1_TN10_13688	OG0011686Hg_chrom2_MM26_13625	OG0011686Hg_chrom2_OP50_7618	OG0011686Hg_chrom2_PA3_6802	OG0011686Hg_chrom2_TN20_7291	OG0011686Hg_chrom2_TN22_7143	OG0011686Hg_chrom2_TN7_6873	OG0011686Hg_chrom2_TN8_7097	OG0011686chr9X12_44668
OG0006117	OG0003547Hg_chrom1_TN10_13686	OG0003547Hg_chrom2_MM26_13627	OG0003547Hg_chrom2_OP50_7621	OG0003547Hg_chrom2_PA3_6804	OG0003547Hg_chrom2_TN20_7292	OG0003547Hg_chrom2_TN22_7144	OG0003547Hg_chrom2_TN7_6874	OG0003547Hg_chrom2_TN8_7098	OG0003547chr9X12_44666
OG0006118	Hg_chrom2_PA3_6807	OG0011687Hg_chrom1_TN10_13684	OG0011687Hg_chrom2_MM26_13630	OG0011687Hg_chrom2_OP50_7622	OG0011687Hg_chrom2_TN20_7293	OG0011687Hg_chrom2_TN22_7147	OG0011687chr9X12_44662	OG0043384Hg_chrom2_TN7_6879	OG0043384Hg_chrom2_TN8_7102
OG0006119	Hg_chrom1_TN10_13681	Hg_chrom2_TN20_7294	OG0001796Hg_chrom2_MM26_13632	OG0001796Hg_chrom2_OP50_7624	OG0001796Hg_chrom2_PA3_6812	OG0001796Hg_chrom2_TN22_7148	OG0001796Hg_chrom2_TN7_6880	OG0001796Hg_chrom2_TN8_7103	OG0001796chr9X12_44659
OG0006120	OG0002525Hg_chrom1_TN10_13677	OG0002525Hg_chrom2_MM26_13636	OG0002525Hg_chrom2_OP50_7628	OG0002525Hg_chrom2_TN20_7299	OG0002525chr9X12_44655	OG0024597Hg_chrom2_PA3_6819	OG0024597Hg_chrom2_TN22_7155	OG0024597Hg_chrom2_TN7_6887	OG0024597Hg_chrom2_TN8_7110
OG0006121	OG0001016Hg_chrom1_TN10_13666	OG0001016Hg_chrom2_MM26_13645	OG0001016Hg_chrom2_OP50_7639	OG0001016Hg_chrom2_PA3_6826	OG0001016Hg_chrom2_TN20_7308	OG0001016Hg_chrom2_TN22_7162	OG0001016Hg_chrom2_TN7_6898	OG0001016Hg_chrom2_TN8_7118	OG0001016chr9X12_44644
OG0006122	OG0004530Hg_chrom1_TN10_13655	OG0004530Hg_chrom2_MM26_13658	OG0004531Hg_chrom2_OP50_7650	OG0004531Hg_chrom2_PA3_6846	OG0004531Hg_chrom2_TN20_7317	OG0004531Hg_chrom2_TN22_7177	OG0004531Hg_chrom2_TN7_6908	OG0004531Hg_chrom2_TN8_7131	OG0004531chr9X12_44628
OG0006123	OG0014676Hg_chrom2_OP50_7654	OG0019694Hg_chrom1_TN10_13645	OG0019694Hg_chrom2_MM26_13672	OG0019694Hg_chrom2_PA3_6852	OG0019694Hg_chrom2_TN20_7324	OG0019694Hg_chrom2_TN22_7187	OG0019694Hg_chrom2_TN7_6917	OG0019694Hg_chrom2_TN8_7138	OG0019694chr9X12_44621
OG0006124	OG0014678Hg_chrom1_TN10_13638	OG0014678Hg_chrom2_MM26_13685	OG0014678Hg_chrom2_OP50_7658	OG0014678Hg_chrom2_PA3_6862	OG0014678Hg_chrom2_TN20_7335	OG0014678Hg_chrom2_TN22_7196	OG0014678Hg_chrom2_TN7_6935	OG0014678Hg_chrom2_TN8_7147	OG0014678chr9X12_44607
OG0006125	OG0016845Hg_chrom1_TN10_13626	OG0016845Hg_chrom2_MM26_13696	OG0016845Hg_chrom2_OP50_7670	OG0016845Hg_chrom2_PA3_6873	OG0016845Hg_chrom2_TN20_7345	OG0016845Hg_chrom2_TN22_7206	OG0016845Hg_chrom2_TN7_6946	OG0016845Hg_chrom2_TN8_7157	OG0016845chr9X12_44599
OG0006126	OG0005150Hg_chrom1_TN10_13624	OG0005150Hg_chrom2_MM26_13698	OG0005150Hg_chrom2_OP50_7672	OG0005150Hg_chrom2_PA3_6875	OG0005150Hg_chrom2_TN20_7346	OG0005150Hg_chrom2_TN22_7207	OG0005150Hg_chrom2_TN7_6947	OG0005150Hg_chrom2_TN8_7159	OG0005150chr9X12_44596
OG0006127	OG0006670Hg_chrom1_TN10_13622	OG0006670Hg_chrom2_MM26_13701	OG0006670Hg_chrom2_OP50_7675	OG0006670Hg_chrom2_PA3_6878	OG0006670Hg_chrom2_TN20_7348	OG0006670Hg_chrom2_TN22_7211	OG0006670Hg_chrom2_TN7_6951	OG0006670Hg_chrom2_TN8_7162	OG0006670chr9X12_44592
OG0006128	OG0001797Hg_chrom1_TN10_13616	OG0001797Hg_chrom2_MM26_13704	OG0001797Hg_chrom2_OP50_7680	OG0001797Hg_chrom2_PA3_6881	OG0001797Hg_chrom2_TN20_7353	OG0001797Hg_chrom2_TN22_7215	OG0001797Hg_chrom2_TN7_6957	OG0001797Hg_chrom2_TN8_7168	OG0001797chr9X12_44586
OG0006129	OG0011688Hg_chrom1_TN10_13597	OG0011688Hg_chrom2_MM26_13720	OG0011688Hg_chrom2_OP50_7702	OG0011688Hg_chrom2_PA3_6897	OG0011688Hg_chrom2_TN20_7363	OG0011688Hg_chrom2_TN8_7181	OG0011688chr9X12_44568	OG0042613Hg_chrom2_TN22_7231	OG0042613Hg_chrom2_TN7_6973
OG0006130	OG0009534Hg_chrom2_OP50_7707	OG0016847Hg_chrom1_TN10_13594	OG0016847Hg_chrom2_MM26_13723	OG0016847Hg_chrom2_PA3_6899	OG0016847Hg_chrom2_TN20_7369	OG0016847Hg_chrom2_TN22_7234	OG0016847Hg_chrom2_TN7_6976	OG0016847Hg_chrom2_TN8_7186	OG0016847chr9X12_44566
OG0006131	OG0010574Hg_chrom1_TN10_13589	OG0010574Hg_chrom2_MM26_13725	OG0010574Hg_chrom2_TN20_7372	OG0010574chr9X12_44563	OG0028018Hg_chrom2_OP50_7711	OG0028018Hg_chrom2_PA3_6902	OG0028018Hg_chrom2_TN22_7238	OG0028018Hg_chrom2_TN7_6980	OG0028018Hg_chrom2_TN8_7190
OG0006132	OG0008558Hg_chrom1_TN10_13583	OG0008558Hg_chrom2_MM26_13728	OG0008558Hg_chrom2_OP50_7717	OG0008558Hg_chrom2_PA3_6906	OG0008558Hg_chrom2_TN20_7378	OG0008558Hg_chrom2_TN22_7240	OG0008558Hg_chrom2_TN7_6985	OG0008558Hg_chrom2_TN8_7194	OG0008558chr9X12_44559
OG0006133	OG0006671Hg_chrom1_TN10_13572	OG0006671Hg_chrom2_MM26_13736	OG0006671Hg_chrom2_OP50_7722	OG0006671Hg_chrom2_TN20_7384	OG0006671Hg_chrom2_TN22_7244	OG0006671Hg_chrom2_TN7_6994	OG0006671chr9X12_44552	OG0039889Hg_chrom2_PA3_6916	OG0039889Hg_chrom2_TN8_7205
OG0006134	OG0005903Hg_chrom1_TN10_13570	OG0005903Hg_chrom2_MM26_13739	OG0005903Hg_chrom2_OP50_7725	OG0005903Hg_chrom2_TN20_7387	OG0005903Hg_chrom2_TN22_7248	OG0005903Hg_chrom2_TN7_6998	OG0005903Hg_chrom2_TN8_7207	OG0005903chr9X12_44550	OG0034715Hg_chrom2_PA3_6918
OG0006135	OG0010576Hg_chrom1_TN10_13568	OG0010576Hg_chrom2_MM26_13741	OG0010576Hg_chrom2_OP50_7726	OG0010576Hg_chrom2_PA3_6922	OG0010576Hg_chrom2_TN20_7388	OG0010576Hg_chrom2_TN22_7250	OG0010576Hg_chrom2_TN7_7002	OG0010576Hg_chrom2_TN8_7208	OG0010576chr9X12_44549
OG0006136	OG0005151Hg_chrom1_TN10_13564	OG0005151Hg_chrom2_MM26_13744	OG0005151Hg_chrom2_PA3_6923	OG0005151Hg_chrom2_TN20_7391	OG0005151Hg_chrom2_TN22_7253	OG0005151Hg_chrom2_TN7_7005	OG0005151Hg_chrom2_TN8_7210	OG0034123Hg_chrom2_OP50_7729	OG0034123chr9X12_44547
OG0006137	OG0004534Hg_chrom1_TN10_13563	OG0004534Hg_chrom2_MM26_13745	OG0004534Hg_chrom2_OP50_7731	OG0004534Hg_chrom2_PA3_6925	OG0004534Hg_chrom2_TN20_7393	OG0004534Hg_chrom2_TN22_7255	OG0004534Hg_chrom2_TN7_7008	OG0004534Hg_chrom2_TN8_7212	OG0004534chr9X12_44544
OG0006139	OG0000726Hg_chrom1_TN10_13545	OG0000726Hg_chrom2_MM26_13761	OG0000726Hg_chrom2_OP50_7744	OG0000726Hg_chrom2_PA3_6941	OG0000726Hg_chrom2_TN20_7408	OG0000726Hg_chrom2_TN22_7270	OG0000726Hg_chrom2_TN7_7024	OG0000726Hg_chrom2_TN8_7228	OG0000726chr9X12_44529
OG0006140	OG0016849Hg_chrom1_TN10_13538	OG0016849Hg_chrom2_MM26_13771	OG0016849Hg_chrom2_PA3_6947	OG0016849Hg_chrom2_TN22_7276	OG0016849Hg_chrom2_TN8_7237	OG0030699Hg_chrom2_OP50_7749	OG0030699Hg_chrom2_TN20_7413	OG0030699Hg_chrom2_TN7_7033	OG0030699chr9X12_44522
OG0006141	OG0008559Hg_chrom1_TN10_13535	OG0008559Hg_chrom2_MM26_13774	OG0008559Hg_chrom2_OP50_7751	OG0008559Hg_chrom2_PA3_6950	OG0008559Hg_chrom2_TN20_7417	OG0008559Hg_chrom2_TN22_7278	OG0008559Hg_chrom2_TN7_7036	OG0008559Hg_chrom2_TN8_7239	OG0008559chr9X12_44520
OG0006143	OG0008560Hg_chrom2_MM26_13807	OG0011690Hg_chrom1_TN10_13507	OG0011690Hg_chrom2_OP50_7780	OG0011690Hg_chrom2_PA3_6974	OG0011690Hg_chrom2_TN20_7441	OG0011690Hg_chrom2_TN22_7303	OG0011690Hg_chrom2_TN7_7063	OG0011690Hg_chrom2_TN8_7270	OG0011690chr9X12_44498
OG0006144	Hg_chrom2_OP50_7784	OG0010578Hg_chrom1_TN10_13501	OG0010578Hg_chrom2_MM26_13817	OG0010578Hg_chrom2_PA3_6984	OG0010578Hg_chrom2_TN20_7448	OG0010578chr9X12_44490	OG0036214Hg_chrom2_TN22_7313	OG0043385Hg_chrom2_TN7_7075	OG0043385Hg_chrom2_TN8_7281
OG0006145	OG0005904Hg_chrom1_TN10_13492	OG0005904Hg_chrom2_MM26_13824	OG0005904Hg_chrom2_OP50_7791	OG0005904Hg_chrom2_PA3_6991	OG0005904Hg_chrom2_TN20_7452	OG0005904Hg_chrom2_TN22_7319	OG0005904Hg_chrom2_TN7_7080	OG0005904Hg_chrom2_TN8_7286	OG0005904chr9X12_44481
OG0006146	OG0013045Hg_chrom1_TN10_13489	OG0013045Hg_chrom2_MM26_13828	OG0013045Hg_chrom2_OP50_7796	OG0013045Hg_chrom2_PA3_6996	OG0013045Hg_chrom2_TN20_7456	OG0013045Hg_chrom2_TN22_7325	OG0013045Hg_chrom2_TN7_7086	OG0013045Hg_chrom2_TN8_7292	OG0013045chr9X12_44476
OG0006147	OG0004004Hg_chrom1_TN10_13487	OG0004004Hg_chrom2_MM26_13830	OG0004004Hg_chrom2_OP50_7799	OG0004004Hg_chrom2_PA3_6998	OG0004004Hg_chrom2_TN20_7459	OG0004004Hg_chrom2_TN22_7328	OG0004004Hg_chrom2_TN7_7090	OG0004004Hg_chrom2_TN8_7296	OG0004004chr9X12_44473
OG0006148	OG0013046Hg_chrom1_TN10_13485	OG0013046Hg_chrom2_MM26_13833	OG0013046Hg_chrom2_OP50_7802	OG0013046Hg_chrom2_PA3_7001	OG0013046Hg_chrom2_TN20_7461	OG0013046Hg_chrom2_TN22_7330	OG0013046Hg_chrom2_TN7_7092	OG0013046Hg_chrom2_TN8_7298	OG0013046chr9X12_44471
OG0006149	OG0001999Hg_chrom1_TN10_13478	OG0001999Hg_chrom2_MM26_13837	OG0001999Hg_chrom2_OP50_7806	OG0001999Hg_chrom2_PA3_7005	OG0001999Hg_chrom2_TN20_7465	OG0001999Hg_chrom2_TN22_7335	OG0001999Hg_chrom2_TN7_7095	OG0001999Hg_chrom2_TN8_7302	OG0001999chr9X12_44466
OG0006150	Hg_chrom1_TN10_13476	OG0016853Hg_chrom2_MM26_13838	OG0016853Hg_chrom2_OP50_7808	OG0016853Hg_chrom2_TN7_7097	OG0016853Hg_chrom2_TN8_7304	OG0019704Hg_chrom2_PA3_7007	OG0019704Hg_chrom2_TN20_7467	OG0019704Hg_chrom2_TN22_7337	OG0019704chr9X12_44464
OG0006151	OG0016857Hg_chrom1_TN10_13453	OG0016857Hg_chrom2_MM26_13868	OG0016857Hg_chrom2_OP50_7825	OG0016857Hg_chrom2_PA3_7034	OG0016857Hg_chrom2_TN20_7488	OG0016857Hg_chrom2_TN22_7364	OG0016857Hg_chrom2_TN7_7122	OG0016857Hg_chrom2_TN8_7331	OG0016857chr9X12_44443
OG0006152	Hg_chrom1_TN10_13447	OG0003160Hg_chrom2_MM26_13870	OG0003160Hg_chrom2_OP50_7828	OG0003160Hg_chrom2_PA3_7036	OG0003160Hg_chrom2_TN20_7489	OG0003160Hg_chrom2_TN22_7368	OG0003160Hg_chrom2_TN7_7125	OG0003160Hg_chrom2_TN8_7333	OG0003160chr9X12_44441
OG0006162	OG0001017Hg_chrom1_TN10_13239	OG0001017Hg_chrom2_MM26_14095	OG0001017Hg_chrom2_OP50_7979	OG0001017Hg_chrom2_PA3_7237	OG0001017Hg_chrom2_TN20_7670	OG0001017Hg_chrom2_TN22_7582	OG0001017Hg_chrom2_TN7_7314	OG0001017Hg_chrom2_TN8_7530	OG0001017chr9X12_44428
OG0006163	OG0010580Hg_chrom1_TN10_13238	OG0010580Hg_chrom2_MM26_14099	OG0010580Hg_chrom2_OP50_7983	OG0010580Hg_chrom2_PA3_7240	OG0010580Hg_chrom2_TN20_7674	OG0010580Hg_chrom2_TN22_7588	OG0010580Hg_chrom2_TN7_7320	OG0010580Hg_chrom2_TN8_7536	OG0010580chr9X12_44427
OG0006164	OG0010581Hg_chrom1_TN10_13233	OG0010581Hg_chrom2_MM26_14102	OG0010581Hg_chrom2_OP50_7986	OG0010581Hg_chrom2_PA3_7244	OG0010581Hg_chrom2_TN20_7676	OG0010581Hg_chrom2_TN22_7591	OG0010581Hg_chrom2_TN7_7322	OG0010581Hg_chrom2_TN8_7537	OG0010581chr9X12_44423
OG0006165	OG0005157Hg_chrom1_TN10_13230	OG0005157Hg_chrom2_MM26_14104	OG0005157Hg_chrom2_OP50_7988	OG0005157Hg_chrom2_PA3_7245	OG0005157Hg_chrom2_TN20_7677	OG0005157Hg_chrom2_TN22_7592	OG0005157Hg_chrom2_TN7_7323	OG0005157Hg_chrom2_TN8_7541	OG0005157chr9X12_44421
OG0006166	OG0008568Hg_chrom1_TN10_13227	OG0008568Hg_chrom2_MM26_14106	OG0008568Hg_chrom2_OP50_7991	OG0008568Hg_chrom2_PA3_7247	OG0008568Hg_chrom2_TN20_7679	OG0008568Hg_chrom2_TN22_7594	OG0008568Hg_chrom2_TN7_7326	OG0008568Hg_chrom2_TN8_7543	OG0008568chr9X12_44418
OG0006167	OG0005158Hg_chrom1_TN10_13215	OG0005158Hg_chrom2_MM26_14116	OG0005158Hg_chrom2_OP50_8004	OG0005158Hg_chrom2_PA3_7257	OG0005158Hg_chrom2_TN20_7686	OG0005158Hg_chrom2_TN22_7604	OG0005158Hg_chrom2_TN7_7336	OG0005158Hg_chrom2_TN8_7555	OG0005158chr9X12_44408
OG0006168	OG0006675Hg_chrom1_TN10_13211	OG0006675Hg_chrom2_MM26_14121	OG0006675Hg_chrom2_PA3_7259	OG0006675Hg_chrom2_TN20_7690	OG0006675Hg_chrom2_TN22_7606	OG0006675chr9X12_44404	OG0030702Hg_chrom2_OP50_8007	OG0030702Hg_chrom2_TN7_7339	OG0030702Hg_chrom2_TN8_7558
OG0006169	OG0003162Hg_chrom1_TN10_13207	OG0003162Hg_chrom2_MM26_14124	OG0003162Hg_chrom2_OP50_8012	OG0003162Hg_chrom2_PA3_7265	OG0003162Hg_chrom2_TN20_7694	OG0003162Hg_chrom2_TN22_7611	OG0003162Hg_chrom2_TN7_7343	OG0003162Hg_chrom2_TN8_7565	OG0003162chr9X12_44398
OG0006170	OG0005907Hg_chrom1_TN10_13205	OG0005907Hg_chrom2_MM26_14128	OG0005907Hg_chrom2_OP50_8014	OG0005907Hg_chrom2_PA3_7268	OG0005907Hg_chrom2_TN20_7695	OG0005907Hg_chrom2_TN22_7615	OG0005907Hg_chrom2_TN7_7347	OG0005907Hg_chrom2_TN8_7568	OG0005907chr9X12_44396
OG0006171	OG0000523Hg_chrom2_MM26_14130	OG0000523Hg_chrom2_PA3_7269	OG0000523Hg_chrom2_TN22_7616	OG0000523Hg_chrom2_TN7_7348	OG0000523Hg_chrom2_TN8_7571	OG0004007Hg_chrom1_TN10_13200	OG0004007Hg_chrom2_OP50_8015	OG0004007Hg_chrom2_TN20_7698	chr9X12_44392
OG0006173	Hg_chrom2_PA3_7309	OG0002526Hg_chrom2_OP50_8048	OG0002526Hg_chrom2_TN20_7749	OG0002526Hg_chrom2_TN8_7602	OG0014692Hg_chrom1_TN10_13174	OG0014692Hg_chrom2_MM26_14164	OG0014692Hg_chrom2_TN22_7657	OG0014692Hg_chrom2_TN7_7414	OG0014692chr9X12_44360
OG0006174	OG0014693Hg_chrom1_TN10_13179	OG0014693Hg_chrom2_MM26_14168	OG0014693Hg_chrom2_OP50_8047	OG0014693Hg_chrom2_PA3_7305	OG0014693Hg_chrom2_TN20_7745	OG0014693Hg_chrom2_TN22_7653	OG0014693Hg_chrom2_TN7_7409	OG0014693Hg_chrom2_TN8_7600	OG0014693chr9X12_44366
OG0006176	OG0002843Hg_chrom1_TN10_13158	OG0002843Hg_chrom2_MM26_14213	OG0002843Hg_chrom2_OP50_8056	OG0002843Hg_chrom2_PA3_7338	OG0002843Hg_chrom2_TN20_7760	OG0002843Hg_chrom2_TN22_7664	OG0002843Hg_chrom2_TN7_7424	OG0002843Hg_chrom2_TN8_7615	OG0002843chr9X12_44351
OG0006177	OG0002000Hg_chrom1_TN10_13140	OG0002000Hg_chrom2_MM26_14236	OG0002000Hg_chrom2_OP50_8070	OG0002000Hg_chrom2_PA3_7347	OG0002000Hg_chrom2_TN20_7775	OG0002000Hg_chrom2_TN22_7683	OG0002000Hg_chrom2_TN7_7444	OG0002000Hg_chrom2_TN8_7629	OG0002000chr9X12_44335
OG0006178	OG0002527Hg_chrom1_TN10_13137	OG0002527Hg_chrom2_MM26_14242	OG0002527Hg_chrom2_OP50_8076	OG0002527Hg_chrom2_PA3_7353	OG0002527Hg_chrom2_TN20_7779	OG0002527Hg_chrom2_TN22_7689	OG0002527Hg_chrom2_TN7_7447	OG0002527Hg_chrom2_TN8_7638	OG0002527chr9X12_44329
OG0006179	OG0011703Hg_chrom1_TN10_13126	OG0011703Hg_chrom2_MM26_14248	OG0011703Hg_chrom2_PA3_7359	OG0011703Hg_chrom2_TN22_7694	OG0011703Hg_chrom2_TN7_7454	OG0011703Hg_chrom2_TN8_7644	OG0011703chr9X12_44323	OG0014694Hg_chrom2_OP50_8078	OG0014694Hg_chrom2_TN20_7783
OG0006180	OG0010583Hg_chrom1_TN10_13124	OG0010583Hg_chrom2_MM26_14251	OG0010583Hg_chrom2_OP50_8084	OG0010583Hg_chrom2_PA3_7364	OG0010583Hg_chrom2_TN20_7787	OG0010583Hg_chrom2_TN22_7698	OG0010583Hg_chrom2_TN7_7459	OG0010583Hg_chrom2_TN8_7648	OG0010583chr9X12_44320
OG0006181	OG0007616Hg_chrom1_TN10_13088	OG0007616Hg_chrom2_MM26_14287	OG0007616Hg_chrom2_OP50_8128	OG0007616Hg_chrom2_PA3_7396	OG0007616Hg_chrom2_TN20_7817	OG0007616Hg_chrom2_TN22_7730	OG0007616Hg_chrom2_TN7_7492	OG0007616Hg_chrom2_TN8_7683	OG0007616chr9X12_44294
OG0006182	Hg_chrom2_OP50_8130	OG0002528Hg_chrom2_PA3_7401	OG0002528Hg_chrom2_TN20_7819	OG0013056Hg_chrom1_TN10_13081	OG0013056Hg_chrom2_MM26_14290	OG0013056Hg_chrom2_TN22_7733	OG0013056Hg_chrom2_TN7_7495	OG0013056Hg_chrom2_TN8_7686	OG0013056chr9X12_44292
OG0006185	OG0001243Hg_chrom1_TN10_12955	OG0001243Hg_chrom2_MM26_14405	OG0001243Hg_chrom2_OP50_8214	OG0001243Hg_chrom2_PA3_7557	OG0001243Hg_chrom2_TN20_7918	OG0001243Hg_chrom2_TN22_7827	OG0001243Hg_chrom2_TN7_7597	OG0001243Hg_chrom2_TN8_7781	OG0001243chr9X12_44170
OG0006186	OG0005161Hg_chrom1_TN10_12953	OG0005161Hg_chrom2_MM26_14410	OG0005161Hg_chrom2_OP50_8219	OG0005161Hg_chrom2_PA3_7559	OG0005161Hg_chrom2_TN20_7921	OG0005161Hg_chrom2_TN22_7830	OG0005161Hg_chrom2_TN7_7599	OG0005161Hg_chrom2_TN8_7784	OG0005161chr9X12_44167
OG0006194	OG0002530Hg_chrom1_TN10_12879	OG0002530Hg_chrom2_MM26_14581	OG0002530Hg_chrom2_OP50_8341	OG0002530Hg_chrom2_PA3_7681	OG0002530Hg_chrom2_TN20_8045	OG0002530Hg_chrom2_TN22_7982	OG0002530Hg_chrom2_TN7_7745	OG0002530Hg_chrom2_TN8_7921	OG0002530chr4X12_21981
OG0006197	OG0005168Hg_chrom1_TN10_12484	OG0005168Hg_chrom2_MM26_14758	OG0005168Hg_chrom2_PA3_8136	OG0005168Hg_chrom2_TN20_8315	OG0005168Hg_chrom2_TN22_8322	OG0005168Hg_chrom2_TN7_8035	OG0005168Hg_chrom2_TN8_8225	OG0005168chr2X12_9762	OG0029188Hg_chrom2_OP50_8607
OG0006199	OG0010596Hg_chrom1_TN10_12466	OG0010596Hg_chrom2_MM26_14771	OG0010596Hg_chrom2_OP50_8620	OG0010596Hg_chrom2_PA3_8148	OG0010596Hg_chrom2_TN20_8326	OG0010596Hg_chrom2_TN22_8334	OG0010596Hg_chrom2_TN7_8048	OG0010596Hg_chrom2_TN8_8238	OG0010596chr2X12_9746
OG0006201	OG0005919Hg_chrom1_TN10_12435	OG0005919Hg_chrom2_MM26_14813	OG0005919Hg_chrom2_OP50_8651	OG0005919Hg_chrom2_PA3_8172	OG0005919Hg_chrom2_TN20_8349	OG0005919Hg_chrom2_TN22_8360	OG0005919Hg_chrom2_TN7_8078	OG0005919Hg_chrom2_TN8_8266	OG0005919chr2X12_9706
OG0006203	OG0014711Hg_chrom2_MM26_14828	OG0014711Hg_chrom2_PA3_8184	OG0014711Hg_chrom2_TN20_8363	OG0016893Hg_chrom1_TN10_12421	OG0016893Hg_chrom2_OP50_8682	OG0016893Hg_chrom2_TN22_8374	OG0016893Hg_chrom2_TN7_8092	OG0016893Hg_chrom2_TN8_8281	OG0016893chr2X12_9693
OG0006204	OG0003558Hg_chrom1_TN10_12419	OG0003558Hg_chrom2_MM26_14830	OG0003558Hg_chrom2_OP50_8684	OG0003558Hg_chrom2_PA3_8186	OG0003558Hg_chrom2_TN20_8365	OG0003558Hg_chrom2_TN22_8376	OG0003558Hg_chrom2_TN7_8095	OG0003558Hg_chrom2_TN8_8284	OG0003558chr2X12_9692
OG0006205	OG0014712Hg_chrom2_MM26_14835	OG0014712Hg_chrom2_OP50_8707	OG0014712Hg_chrom2_PA3_8201	OG0014712Hg_chrom2_TN20_8381	OG0014712Hg_chrom2_TN22_8392	OG0014712Hg_chrom2_TN7_8109	OG0014712Hg_chrom2_TN8_8296	OG0014712chr2X12_9675	OG0014713Hg_chrom1_TN10_12397
OG0006206	OG0010599Hg_chrom1_TN10_12381	OG0010599Hg_chrom2_MM26_14857	OG0010599Hg_chrom2_OP50_8738	OG0010599Hg_chrom2_PA3_8215	OG0010599Hg_chrom2_TN20_8396	OG0010599Hg_chrom2_TN22_8410	OG0010599Hg_chrom2_TN7_8123	OG0010599Hg_chrom2_TN8_8318	OG0010599chr2X12_9662
OG0006207	OG0010600Hg_chrom1_TN10_12524	OG0010600Hg_chrom2_MM26_14900	OG0010600Hg_chrom2_OP50_8575	OG0010600Hg_chrom2_PA3_8106	OG0010600Hg_chrom2_TN20_8290	OG0010600Hg_chrom2_TN22_8293	OG0010600Hg_chrom2_TN7_8003	OG0010600Hg_chrom2_TN8_8195	OG0010600chr2X12_9807
OG0006208	OG0008575Hg_chrom2_MM26_14903	OG0008575Hg_chrom2_OP50_8570	OG0008575Hg_chrom2_PA3_8102	OG0008575Hg_chrom2_TN20_8286	OG0008575Hg_chrom2_TN7_7999	OG0021938Hg_chrom1_TN10_12527	OG0021938Hg_chrom2_TN22_8289	OG0021938Hg_chrom2_TN8_8190	OG0021938chr2X12_9814
OG0006212	OG0014720Hg_chrom1_TN10_12553	OG0014720Hg_chrom2_MM26_14936	OG0014720Hg_chrom2_OP50_8537	OG0014720Hg_chrom2_PA3_8072	OG0014720Hg_chrom2_TN20_8258	OG0014720Hg_chrom2_TN22_8264	OG0014720Hg_chrom2_TN7_7965	OG0014720Hg_chrom2_TN8_8158	OG0014720chr2X12_9953
OG0006230	OG0016921Hg_chrom2_MM26_15628	OG0016921Hg_chrom3_OP50_10947	OG0016921Hg_chrom3_PA3_14261	OG0016921Hg_chrom3_TN10_20102	OG0016921Hg_chrom3_TN20_11798	OG0016921Hg_chrom3_TN22_13787	OG0016921Hg_chrom3_TN7_13904	OG0016921Hg_chrom3_TN8_13154	OG0016921chr3X12_16136
OG0006231	OG0016923Hg_chrom2_MM26_15672	OG0016923Hg_chrom2_PA3_8632	OG0016923Hg_chrom2_TN20_8907	OG0016923chr2X12_8772	OG0021679Hg_chrom1_TN10_11383	OG0021679Hg_chrom2_OP50_9186	OG0021679Hg_chrom2_TN22_8900	OG0021679Hg_chrom2_TN7_8696	OG0021679Hg_chrom2_TN8_8816
OG0006233	OG0006702Hg_chrom1_TN10_11350	OG0006702Hg_chrom2_MM26_15745	OG0006702Hg_chrom2_OP50_9215	OG0006702Hg_chrom2_PA3_8658	OG0006702Hg_chrom2_TN20_8935	OG0006702Hg_chrom2_TN22_8924	OG0006702Hg_chrom2_TN7_8727	OG0006702Hg_chrom2_TN8_9018	OG0006702chr2X12_8747
OG0006234	OG0011733Hg_chrom1_TN10_11354	OG0011733Hg_chrom2_MM26_15750	OG0011733Hg_chrom2_OP50_9211	OG0011733Hg_chrom2_PA3_8654	OG0011733Hg_chrom2_TN22_8919	OG0011733Hg_chrom2_TN7_8724	OG0011733Hg_chrom2_TN8_9015	OG0011733chr2X12_8752	OG0013096Hg_chrom2_TN20_8930
OG0006238	OG0009564Hg_chrom1_TN10_11198	OG0009564Hg_chrom2_MM26_15834	OG0009564Hg_chrom2_PA3_8748	OG0009564Hg_chrom2_TN20_8990	OG0009564Hg_chrom2_TN22_8965	OG0009564Hg_chrom2_TN7_8800	OG0009564Hg_chrom2_TN8_9067	OG0009564chr2X12_8661	OG0030717Hg_chrom2_OP50_9285
OG0006241	OG0006703Hg_chrom1_TN10_11211	OG0006703Hg_chrom2_MM26_15910	OG0006703Hg_chrom2_OP50_9276	OG0006703Hg_chrom2_PA3_8734	OG0006703Hg_chrom2_TN20_8978	OG0006703Hg_chrom2_TN22_8981	OG0006703Hg_chrom2_TN7_8779	OG0006703Hg_chrom2_TN8_9060	OG0006703chr2X12_8527
OG0006242	OG0016930Hg_chrom1_PA3_1416	OG0016930Hg_chrom1_TN7_1278	OG0016930Hg_chrom1_TN8_1380	OG0016930Hg_chrom2_MM26_15923	OG0016930Hg_chrom2_OP50_8531	OG0016930Hg_chrom2_TN10_754	OG0016930Hg_chrom2_TN20_9251	OG0016930Hg_chrom2_TN22_8261	OG0016930chr5X12_26909
OG0006247	OG0013106Hg_chrom2_OP50_9428	OG0013106Hg_chrom2_PA3_9194	OG0013106Hg_chrom2_TN20_9335	OG0013106Hg_chrom2_TN22_9267	OG0013106Hg_chrom2_TN7_9105	OG0013106chr2X12_8284	OG0022475Hg_chrom1_TN10_10898	OG0022475Hg_chrom2_MM26_16138	OG0022475Hg_chrom2_TN8_9220
OG0006249	OG0001804Hg_chrom1_TN10_10923	OG0001804Hg_chrom2_MM26_16173	OG0001804Hg_chrom2_OP50_9413	OG0001804Hg_chrom2_PA3_9157	OG0001804Hg_chrom2_TN20_9308	OG0001804Hg_chrom2_TN22_9233	OG0001804Hg_chrom2_TN7_9071	OG0001804Hg_chrom2_TN8_9192	OG0001804chr2X12_8383
OG0006250	OG0014749Hg_chrom1_TN10_10921	OG0014749Hg_chrom2_MM26_16179	OG0014749Hg_chrom2_OP50_9415	OG0014749Hg_chrom2_PA3_9161	OG0014749Hg_chrom2_TN20_9311	OG0014749Hg_chrom2_TN22_9236	OG0014749Hg_chrom2_TN7_9073	OG0014749Hg_chrom2_TN8_9195	OG0014749chr2X12_8382
OG0006251	OG0014750Hg_chrom1_TN10_10987	OG0014750Hg_chrom2_MM26_16190	OG0014750Hg_chrom2_OP50_9381	OG0014750Hg_chrom2_PA3_9116	OG0014750Hg_chrom2_TN20_9274	OG0014750Hg_chrom2_TN22_9185	OG0014750Hg_chrom2_TN7_9024	OG0014750Hg_chrom2_TN8_9154	OG0014750chr2X12_8426
OG0006252	OG0002852Hg_chrom1_TN10_10984	OG0002852Hg_chrom2_MM26_16192	OG0002852Hg_chrom2_OP50_9377	OG0002852Hg_chrom2_PA3_9113	OG0002852Hg_chrom2_TN20_9269	OG0002852Hg_chrom2_TN22_9182	OG0002852Hg_chrom2_TN7_9026	OG0002852Hg_chrom2_TN8_9152	OG0002852chr2X12_8423
OG0006253	OG0000157Hg_chrom1_TN10_10977	OG0000157Hg_chrom2_MM26_16195	OG0000157Hg_chrom2_OP50_9385	OG0000157Hg_chrom2_PA3_9120	OG0000157Hg_chrom2_TN20_9281	OG0000157Hg_chrom2_TN22_9192	OG0000157Hg_chrom2_TN7_9029	OG0000157Hg_chrom2_TN8_9156	OG0000157chr2X12_8420
OG0006254	OG0002244Hg_chrom1_TN10_10969	OG0002244Hg_chrom2_OP50_9389	OG0002244Hg_chrom2_PA3_9125	OG0002244Hg_chrom2_TN20_9284	OG0002244Hg_chrom2_TN8_9159	OG0002535Hg_chrom2_MM26_16201	OG0002535Hg_chrom2_TN22_9196	OG0002535Hg_chrom2_TN7_9035	OG0002535chr2X12_8414
OG0006255	Hg_chrom2_MM26_16213	OG0009567Hg_chrom1_TN10_10957	OG0012615Hg_chrom2_OP50_9396	OG0012615Hg_chrom2_PA3_9133	OG0012615Hg_chrom2_TN20_9290	OG0012615Hg_chrom2_TN22_9209	OG0012615Hg_chrom2_TN7_9046	OG0012615Hg_chrom2_TN8_9167	OG0012615chr2X12_8404
OG0006256	OG0007643Hg_chrom1_TN10_10944	OG0007643Hg_chrom2_MM26_16221	OG0007643Hg_chrom2_OP50_9399	OG0007643Hg_chrom2_PA3_9135	OG0007643Hg_chrom2_TN20_9294	OG0007643Hg_chrom2_TN22_9212	OG0007643Hg_chrom2_TN7_9049	OG0007643Hg_chrom2_TN8_9170	OG0007643chr2X12_8403
OG0006257	OG0011744Hg_chrom2_MM26_16276	OG0011744Hg_chrom2_OP50_9555	OG0011744Hg_chrom2_PA3_9399	OG0011744Hg_chrom2_TN20_9500	OG0011744Hg_chrom2_TN22_9418	OG0011744Hg_chrom2_TN7_9302	OG0031590Hg_chrom1_TN10_10742	OG0031590Hg_chrom2_TN8_9399	OG0031590chr2X12_8126
OG0006258	OG0008595Hg_chrom1_TN10_10714	OG0008595Hg_chrom2_MM26_16296	OG0008595Hg_chrom2_OP50_9573	OG0008595Hg_chrom2_PA3_9421	OG0008595Hg_chrom2_TN20_9515	OG0008595Hg_chrom2_TN7_9328	OG0008595chr2X12_8036	OG0042646Hg_chrom2_TN22_9463	OG0042646Hg_chrom2_TN8_9424
OG0006259	OG0016937Hg_chrom1_TN10_10713	OG0016937Hg_chrom2_MM26_16297	OG0016937Hg_chrom2_OP50_9574	OG0016937Hg_chrom2_PA3_9423	OG0016937Hg_chrom2_TN20_9517	OG0016937Hg_chrom2_TN22_9465	OG0016937Hg_chrom2_TN7_9330	OG0016937Hg_chrom2_TN8_9426	OG0016937chr2X12_8035
OG0006260	Hg_chrom2_TN22_9488	OG0005178Hg_chrom1_TN10_10685	OG0005178Hg_chrom2_MM26_16310	OG0005178Hg_chrom2_OP50_9585	OG0005178Hg_chrom2_PA3_9439	OG0005178Hg_chrom2_TN20_9527	OG0005178Hg_chrom2_TN7_9346	OG0005178Hg_chrom2_TN8_9448	chr2X12_8023
OG0006261	OG0014752Hg_chrom2_TN22_9491	OG0014752Hg_chrom2_TN7_9350	OG0014752Hg_chrom2_TN8_9453	OG0024668Hg_chrom1_TN10_10679	OG0024668Hg_chrom2_MM26_16315	OG0024668Hg_chrom2_OP50_9589	OG0024668Hg_chrom2_PA3_9444	OG0024668Hg_chrom2_TN20_9534	OG0024668chr2X12_8016
OG0006262	OG0005179Hg_chrom1_TN10_10669	OG0005179Hg_chrom2_MM26_16323	OG0005179Hg_chrom2_OP50_9607	OG0005179Hg_chrom2_PA3_9448	OG0005179Hg_chrom2_TN20_9537	OG0005179Hg_chrom2_TN22_9502	OG0005179Hg_chrom2_TN7_9353	OG0005179Hg_chrom2_TN8_9457	OG0005179chr2X12_8010
OG0006263	OG0008596Hg_chrom1_TN10_10657	OG0008596Hg_chrom2_MM26_16332	OG0008596Hg_chrom2_OP50_9617	OG0008596Hg_chrom2_PA3_9462	OG0008596Hg_chrom2_TN20_9546	OG0008596Hg_chrom2_TN22_9514	OG0008596Hg_chrom2_TN7_9366	OG0008596Hg_chrom2_TN8_9468	OG0008596chr2X12_7996
OG0006264	OG0011748Hg_chrom1_TN10_10629	OG0011748Hg_chrom2_MM26_16359	OG0011748Hg_chrom2_OP50_9640	OG0011748Hg_chrom2_PA3_9488	OG0011748Hg_chrom2_TN20_9569	OG0011748Hg_chrom2_TN22_9538	OG0011748Hg_chrom2_TN7_9396	OG0011748Hg_chrom2_TN8_9494	OG0011748chr2X12_7970
OG0006265	OG0011749Hg_chrom1_TN10_10627	OG0011749Hg_chrom2_MM26_16362	OG0011749Hg_chrom2_OP50_9641	OG0011749Hg_chrom2_PA3_9489	OG0011749Hg_chrom2_TN20_9571	OG0011749Hg_chrom2_TN22_9539	OG0011749Hg_chrom2_TN7_9397	OG0011749Hg_chrom2_TN8_9495	OG0011749chr2X12_7968
OG0006266	OG0002537Hg_chrom1_TN10_10494	OG0002537Hg_chrom2_MM26_16391	OG0002537Hg_chrom2_PA3_9533	OG0002537Hg_chrom2_TN20_9605	OG0002537Hg_chrom2_TN22_9550	OG0002537Hg_chrom2_TN7_9426	OG0002537Hg_chrom2_TN8_9543	OG0002537Hg_chrom4_OP50_19067	OG0002537chr2X12_7914
OG0006267	OG0009571Hg_chrom1_TN10_10496	OG0009571Hg_chrom2_MM26_16396	OG0009571Hg_chrom2_PA3_9539	OG0009571Hg_chrom2_TN20_9611	OG0009571Hg_chrom2_TN22_9556	OG0009571Hg_chrom2_TN7_9433	OG0009571Hg_chrom2_TN8_9550	OG0009571Hg_chrom4_OP50_19063	OG0009571chr2X12_7910
OG0006269	OG0002853Hg_chrom1_TN10_10516	OG0002853Hg_chrom2_MM26_16412	OG0002853Hg_chrom2_PA3_9561	OG0002853Hg_chrom2_TN20_9624	OG0002853Hg_chrom2_TN22_9569	OG0002853Hg_chrom2_TN7_9452	OG0002853Hg_chrom2_TN8_9570	OG0002853Hg_chrom4_OP50_19053	OG0002853chr2X12_7887
OG0006270	OG0007648Hg_chrom1_TN10_10562	OG0007648Hg_chrom2_MM26_16445	OG0007648Hg_chrom2_PA3_9575	OG0007648Hg_chrom2_TN20_9639	OG0007648Hg_chrom4_OP50_19038	OG0007648chr2X12_7830	OG0036234Hg_chrom2_TN22_9608	OG0036234Hg_chrom2_TN7_9466	OG0036234Hg_chrom2_TN8_9586
OG0006271	OG0005183Hg_chrom1_TN10_10568	OG0005183Hg_chrom2_MM26_16447	OG0005183Hg_chrom2_PA3_9577	OG0005183Hg_chrom2_TN20_9641	OG0005183Hg_chrom2_TN22_9610	OG0005183Hg_chrom2_TN7_9469	OG0005183Hg_chrom2_TN8_9588	OG0005183Hg_chrom4_OP50_19036	OG0005183chr2X12_7835
OG0006272	OG0016947Hg_chrom1_TN10_10440	OG0016947Hg_chrom2_MM26_16484	OG0016947Hg_chrom2_PA3_9615	OG0016947Hg_chrom2_TN20_9680	OG0016947Hg_chrom2_TN22_9629	OG0016947Hg_chrom2_TN7_9500	OG0016947Hg_chrom2_TN8_9630	OG0016947Hg_chrom4_OP50_19018	OG0016947chr2X12_7866
OG0006273	OG0006712Hg_chrom1_TN10_10443	OG0006712Hg_chrom2_MM26_16487	OG0006712Hg_chrom2_PA3_9618	OG0006712Hg_chrom2_TN20_9682	OG0006712Hg_chrom2_TN22_9630	OG0006712Hg_chrom2_TN7_9501	OG0006712Hg_chrom2_TN8_9631	OG0006712Hg_chrom4_OP50_19016	OG0006712chr2X12_7867
OG0006278	Hg_chrom1_TN10_10341	OG0011752Hg_chrom2_MM26_16590	OG0011752Hg_chrom2_PA3_9669	OG0011752Hg_chrom2_TN20_9773	OG0011752Hg_chrom2_TN22_9708	OG0011752Hg_chrom2_TN7_9594	OG0011752Hg_chrom2_TN8_9722	OG0011752Hg_chrom4_OP50_18976	OG0011752chr2X12_7734
OG0006280	OG0014759Hg_chrom1_TN10_10322	OG0014759Hg_chrom2_MM26_16634	OG0014759Hg_chrom2_PA3_9721	OG0014759Hg_chrom2_TN20_9785	OG0014759Hg_chrom2_TN22_9726	OG0014759Hg_chrom2_TN7_9620	OG0014759Hg_chrom2_TN8_9744	OG0014759Hg_chrom4_OP50_18960	OG0014759chr2X12_7717
OG0006281	OG0010631Hg_chrom1_TN10_10315	OG0010631Hg_chrom2_MM26_16637	OG0010631Hg_chrom2_PA3_9727	OG0010631Hg_chrom2_TN20_9789	OG0010631Hg_chrom2_TN22_9732	OG0010631Hg_chrom2_TN7_9628	OG0010631Hg_chrom2_TN8_9746	OG0010631Hg_chrom4_OP50_18939	OG0010631chr2X12_7714
OG0006282	OG0011753Hg_chrom1_TN10_10314	OG0011753Hg_chrom2_MM26_16638	OG0011753Hg_chrom2_PA3_9728	OG0011753Hg_chrom2_TN20_9791	OG0011753Hg_chrom2_TN8_9749	OG0011753Hg_chrom4_OP50_18937	OG0011753chr2X12_7712	OG0032148Hg_chrom2_TN22_9735	OG0032148Hg_chrom2_TN7_9630
OG0006283	OG0007653Hg_chrom1_TN10_10273	OG0007653Hg_chrom2_MM26_16671	OG0007653Hg_chrom2_PA3_9763	OG0007653Hg_chrom2_TN20_9826	OG0007653Hg_chrom2_TN22_9777	OG0007653Hg_chrom2_TN7_9677	OG0007653Hg_chrom2_TN8_9787	OG0007653Hg_chrom4_OP50_18899	OG0007653chr2X12_7650
OG0006284	OG0011756Hg_chrom1_TN10_10201	OG0011756Hg_chrom2_TN20_9883	OG0011756Hg_chrom2_TN22_9835	OG0011756Hg_chrom2_TN7_9742	OG0011756Hg_chrom2_TN8_9847	OG0011756Hg_chrom4_OP50_18822	OG0011756chr2X12_7594	OG0013122Hg_chrom2_MM26_16763	OG0013122Hg_chrom2_PA3_9839
OG0006285	OG0007654Hg_chrom2_MM26_16788	OG0007654Hg_chrom2_PA3_9865	OG0007654Hg_chrom2_TN20_9900	OG0007654Hg_chrom2_TN22_9854	OG0007654Hg_chrom2_TN7_9759	OG0007654Hg_chrom2_TN8_9868	OG0007654Hg_chrom4_OP50_18798	OG0040733Hg_chrom1_TN10_10181	OG0040733chr2X12_7579
OG0006286	Hg_chrom2_TN20_9903	OG0004563Hg_chrom1_TN10_10179	OG0004563Hg_chrom2_MM26_16789	OG0004563Hg_chrom2_PA3_9867	OG0004563Hg_chrom2_TN22_9857	OG0004563Hg_chrom2_TN7_9761	OG0004563Hg_chrom2_TN8_9870	OG0004563Hg_chrom4_OP50_18796	OG0004563chr2X12_7575
OG0006287	OG0016958Hg_chrom1_TN10_10167	OG0016958Hg_chrom2_MM26_16794	OG0016958Hg_chrom2_PA3_9873	OG0016958Hg_chrom2_TN20_9907	OG0016958Hg_chrom2_TN22_9864	OG0016958Hg_chrom2_TN7_9769	OG0016958Hg_chrom2_TN8_9876	OG0016958Hg_chrom4_OP50_18791	OG0016958chr2X12_7567
OG0006288	OG0009578Hg_chrom2_MM26_16806	OG0009578Hg_chrom2_PA3_9885	OG0009578Hg_chrom2_TN20_9919	OG0009578Hg_chrom2_TN22_9875	OG0009578Hg_chrom2_TN7_9781	OG0009578Hg_chrom4_OP50_18778	OG0009578chr2X12_7548	OG0024678Hg_chrom1_TN10_10147	OG0030839Hg_chrom2_TN8_9891
OG0006289	OG0004029Hg_chrom1_TN10_10138	OG0004029Hg_chrom2_MM26_16809	OG0004029Hg_chrom2_PA3_9893	OG0004029Hg_chrom2_TN20_9923	OG0004029Hg_chrom2_TN22_9879	OG0004029Hg_chrom2_TN7_9790	OG0004029Hg_chrom2_TN8_9897	OG0004029Hg_chrom4_OP50_18773	OG0004029chr2X12_7543
OG0006290	OG0002855Hg_chrom1_TN10_10135	OG0002855Hg_chrom2_MM26_16811	OG0002855Hg_chrom2_PA3_9894	OG0002855Hg_chrom2_TN20_9927	OG0002855Hg_chrom2_TN22_9882	OG0002855Hg_chrom2_TN7_9791	OG0002855Hg_chrom4_OP50_18766	OG0002855chr2X12_7539	OG0042655Hg_chrom2_TN8_9898
OG0006293	OG0005934Hg_chrom2_MM26_16859	OG0006066Hg_chrom1_TN10_10079	OG0006066Hg_chrom2_TN20_9951	OG0006066Hg_chrom2_TN22_9924	OG0006066Hg_chrom2_TN7_9838	OG0006066Hg_chrom2_TN8_9939	OG0006066Hg_chrom4_OP50_18731	OG0006066chr2X12_7496	OG0025867Hg_chrom2_PA3_9935
OG0006294	Hg_chrom4_OP50_18725	OG0026081Hg_chrom1_TN10_10077	OG0026081Hg_chrom2_TN7_9841	OG0026081chr2X12_7493	OG0026963Hg_chrom2_MM26_16861	OG0026963Hg_chrom2_PA3_9941	OG0026963Hg_chrom2_TN20_9955	OG0026963Hg_chrom2_TN22_9927	OG0026963Hg_chrom2_TN8_9943
OG0006301	OG0010636Hg_chrom3_MM26_17068	OG0010636Hg_chrom3_PA3_13244	OG0010636Hg_chrom3_TN10_21763	OG0010636Hg_chrom3_TN20_10955	OG0010636Hg_chrom3_TN7_12813	OG0010636Hg_chrom3_TN8_12265	OG0010636chr3X12_16487	OG0038984Hg_chrom3_OP50_10127	OG0038984Hg_chrom3_TN22_12657
OG0006302	OG0010638Hg_chrom3_MM26_17071	OG0010638Hg_chrom3_OP50_10132	OG0010638Hg_chrom3_PA3_13247	OG0010638Hg_chrom3_TN10_21762	OG0010638Hg_chrom3_TN20_10957	OG0010638Hg_chrom3_TN22_12661	OG0010638Hg_chrom3_TN7_12816	OG0010638Hg_chrom3_TN8_12269	OG0010638chr3X12_16489
OG0006303	OG0001412Hg_chrom3_MM26_17077	OG0001412Hg_chrom3_OP50_10134	OG0001412Hg_chrom3_PA3_13253	OG0001412Hg_chrom3_TN10_21754	OG0001412Hg_chrom3_TN20_10960	OG0001412Hg_chrom3_TN22_12665	OG0001412Hg_chrom3_TN7_12821	OG0001412Hg_chrom3_TN8_12274	OG0001412chr3X12_16496
OG0006304	OG0011762Hg_chrom3_TN10_21748	OG0011762Hg_chrom3_TN20_10963	OG0022502Hg_chrom3_MM26_17083	OG0022502Hg_chrom3_OP50_10136	OG0022502Hg_chrom3_PA3_13257	OG0022502Hg_chrom3_TN22_12669	OG0022502Hg_chrom3_TN7_12824	OG0022502Hg_chrom3_TN8_12277	OG0022502chr3X12_16504
OG0006305	OG0013125Hg_chrom3_MM26_17085	OG0013125Hg_chrom3_OP50_10137	OG0013125Hg_chrom3_PA3_13261	OG0013125Hg_chrom3_TN10_21745	OG0013125Hg_chrom3_TN20_10965	OG0013125Hg_chrom3_TN22_12671	OG0013125Hg_chrom3_TN7_12826	OG0013125Hg_chrom3_TN8_12280	OG0013125chr3X12_16507
OG0006306	OG0009583Hg_chrom3_MM26_17086	OG0009583Hg_chrom3_OP50_10139	OG0009583Hg_chrom3_TN10_21738	OG0009583Hg_chrom3_TN20_10967	OG0013126Hg_chrom3_TN7_12827	OG0019136Hg_chrom3_PA3_13263	OG0019136Hg_chrom3_TN22_12673	OG0019136Hg_chrom3_TN8_12281	OG0019136chr3X12_16509
OG0006308	OG0007659Hg_chrom3_MM26_17172	OG0007659Hg_chrom3_OP50_10173	OG0007659Hg_chrom3_PA3_13315	OG0007659Hg_chrom3_TN10_21678	OG0007659Hg_chrom3_TN20_11014	OG0007659Hg_chrom3_TN22_12719	OG0007659Hg_chrom3_TN7_12871	OG0007659Hg_chrom3_TN8_12324	OG0007659chr3X12_16552
OG0006309	OG0013129Hg_chrom3_MM26_17174	OG0013129Hg_chrom3_OP50_10175	OG0013129Hg_chrom3_PA3_13317	OG0013129Hg_chrom3_TN10_21677	OG0013129Hg_chrom3_TN20_11015	OG0013129Hg_chrom3_TN22_12721	OG0013129Hg_chrom3_TN7_12873	OG0013129Hg_chrom3_TN8_12326	OG0013129chr3X12_16554
OG0006310	OG0013130Hg_chrom3_MM26_17177	OG0013130Hg_chrom3_OP50_10178	OG0013130Hg_chrom3_PA3_13318	OG0013130Hg_chrom3_TN10_21676	OG0013130Hg_chrom3_TN20_11016	OG0013130Hg_chrom3_TN22_12723	OG0013130Hg_chrom3_TN7_12877	OG0013130Hg_chrom3_TN8_12328	OG0013130chr3X12_16557
OG0006312	OG0003576Hg_chrom3_TN10_21624	OG0013132Hg_chrom3_MM26_17202	OG0013132Hg_chrom3_OP50_10198	OG0013132Hg_chrom3_PA3_13356	OG0013132Hg_chrom3_TN20_11049	OG0013132Hg_chrom3_TN22_12755	OG0013132Hg_chrom3_TN7_12916	OG0013132Hg_chrom3_TN8_12351	OG0013132chr3X12_16589
OG0006313	OG0016966Hg_chrom3_MM26_17211	OG0016966Hg_chrom3_OP50_10206	OG0016966Hg_chrom3_PA3_13367	OG0016966Hg_chrom3_TN10_21631	OG0016966Hg_chrom3_TN20_11055	OG0016966Hg_chrom3_TN22_12764	OG0016966Hg_chrom3_TN7_12924	OG0016966Hg_chrom3_TN8_12364	OG0016966chr3X12_16598
OG0006314	OG0003182Hg_chrom3_MM26_17215	OG0003182Hg_chrom3_OP50_10214	OG0003182Hg_chrom3_PA3_13374	OG0003182Hg_chrom3_TN10_21614	OG0003182Hg_chrom3_TN20_11064	OG0003182Hg_chrom3_TN22_12772	OG0003182Hg_chrom3_TN7_12935	OG0003182Hg_chrom3_TN8_12373	OG0003182chr3X12_16608
OG0006318	OG0005196Hg_chrom3_MM26_17614	OG0005196Hg_chrom3_OP50_10495	OG0005196Hg_chrom3_TN10_20924	OG0005196Hg_chrom3_TN20_11336	OG0005196Hg_chrom3_TN22_13265	OG0005196Hg_chrom3_TN7_13341	OG0005196chr3X12_16783	OG0039967Hg_chrom3_PA3_13661	OG0039967Hg_chrom3_TN8_12622
OG0006319	OG0016980Hg_chrom3_MM26_17616	OG0016980Hg_chrom3_OP50_10497	OG0016980Hg_chrom3_PA3_13663	OG0016980Hg_chrom3_TN10_20921	OG0016980Hg_chrom3_TN20_11338	OG0016980Hg_chrom3_TN22_13268	OG0016980Hg_chrom3_TN7_13343	OG0016980Hg_chrom3_TN8_12624	OG0016980chr3X12_16781
OG0006326	OG0003190Hg_chrom3_MM26_18080	OG0003190Hg_chrom3_OP50_10705	OG0003190Hg_chrom3_PA3_14002	OG0003190Hg_chrom3_TN10_20471	OG0003190Hg_chrom3_TN20_11591	OG0003190Hg_chrom3_TN22_13527	OG0003190Hg_chrom3_TN7_13648	OG0003190Hg_chrom3_TN8_12889	OG0003190chr3X12_16153
OG0006329	OG0007676Hg_chrom3_MM26_18176	OG0007676Hg_chrom3_OP50_10888	OG0007676Hg_chrom3_PA3_14220	OG0007676Hg_chrom3_TN22_13749	OG0007676Hg_chrom3_TN7_13882	OG0007676Hg_chrom3_TN8_13118	OG0007676chr3X12_16323	OG0011782Hg_chrom3_TN10_20154	OG0011782Hg_chrom3_TN20_11785
OG0006330	OG0005946Hg_chrom2_OP50_8317	OG0005946Hg_chrom3_MM26_18273	OG0005946Hg_chrom3_PA3_14333	OG0005946Hg_chrom3_TN10_19141	OG0005946Hg_chrom3_TN20_11821	OG0005946Hg_chrom3_TN22_13885	OG0005946Hg_chrom3_TN7_14057	OG0005946Hg_chrom3_TN8_13243	OG0005946chr3X12_16084
OG0006335	OG0005950Hg_chrom3_MM26_18526	OG0005950Hg_chrom3_OP50_11168	OG0005950Hg_chrom3_TN10_19877	OG0005950Hg_chrom3_TN22_14044	OG0005950chr3X12_15941	OG0017015Hg_chrom3_PA3_14505	OG0017015Hg_chrom3_TN20_11991	OG0017015Hg_chrom3_TN7_14170	OG0017015Hg_chrom3_TN8_13366
OG0006336	OG0017016Hg_chrom3_MM26_18529	OG0017016Hg_chrom3_OP50_11169	OG0017016Hg_chrom3_PA3_14509	OG0017016Hg_chrom3_TN10_19875	OG0017016Hg_chrom3_TN20_11994	OG0017016Hg_chrom3_TN22_14047	OG0017016Hg_chrom3_TN7_14174	OG0017016Hg_chrom3_TN8_13371	OG0017016chr3X12_15939
OG0006339	OG0017022Hg_chrom3_MM26_18595	OG0017022Hg_chrom3_OP50_11245	OG0017022Hg_chrom3_PA3_14561	OG0017022Hg_chrom3_TN10_19799	OG0017022Hg_chrom3_TN20_12052	OG0017022Hg_chrom3_TN22_14105	OG0017022Hg_chrom3_TN7_14233	OG0017022Hg_chrom3_TN8_13461	OG0017022chr3X12_15829
OG0006340	OG0004574Hg_chrom3_MM26_18599	OG0004574Hg_chrom3_OP50_11252	OG0004574Hg_chrom3_PA3_14568	OG0004574Hg_chrom3_TN10_19792	OG0004574Hg_chrom3_TN20_12060	OG0004574Hg_chrom3_TN22_14110	OG0004574Hg_chrom3_TN7_14239	OG0004574Hg_chrom3_TN8_13470	OG0004574chr3X12_15823
OG0006341	Hg_chrom3_MM26_18602	OG0017023Hg_chrom3_OP50_11253	OG0017023Hg_chrom3_PA3_14571	OG0017023Hg_chrom3_TN10_19790	OG0017023Hg_chrom3_TN20_12061	OG0017023Hg_chrom3_TN22_14113	OG0017023Hg_chrom3_TN7_14243	OG0017023Hg_chrom3_TN8_13474	OG0017023chr3X12_15820
OG0006342	OG0002864Hg_chrom3_MM26_18604	OG0002864Hg_chrom3_OP50_11254	OG0002864Hg_chrom3_PA3_14574	OG0002864Hg_chrom3_TN10_19788	OG0002864Hg_chrom3_TN20_12062	OG0002864Hg_chrom3_TN22_14116	OG0002864Hg_chrom3_TN7_14246	OG0002864Hg_chrom3_TN8_13476	OG0002864chr3X12_15816
OG0006343	Hg_chrom3_OP50_11263	OG0011791Hg_chrom3_PA3_14584	OG0011791Hg_chrom3_TN20_12070	OG0011791Hg_chrom3_TN22_14124	OG0011791Hg_chrom3_TN7_14253	OG0011791chr3X12_15802	OG0014804Hg_chrom3_MM26_18617	OG0014804Hg_chrom3_TN10_19782	OG0014804Hg_chrom3_TN8_13488
OG0006345	OG0005204Hg_chrom3_OP50_11268	OG0005204Hg_chrom3_PA3_14594	OG0005204Hg_chrom3_TN10_19773	OG0005204Hg_chrom3_TN20_12077	OG0005204Hg_chrom3_TN22_14132	OG0005204Hg_chrom3_TN7_14260	OG0005204chr3X12_15793	OG0032994Hg_chrom3_MM26_18623	OG0032994Hg_chrom3_TN8_13493
OG0006346	OG0014805Hg_chrom3_MM26_18626	OG0014805Hg_chrom3_OP50_11269	OG0014805Hg_chrom3_PA3_14596	OG0014805Hg_chrom3_TN10_19708	OG0014805Hg_chrom3_TN20_12079	OG0014805Hg_chrom3_TN22_14134	OG0014805Hg_chrom3_TN7_14264	OG0014805Hg_chrom3_TN8_13495	OG0014805chr3X12_15791
OG0006347	Hg_chrom3_OP50_11277	OG0017025Hg_chrom3_MM26_18642	OG0017025Hg_chrom3_PA3_14611	OG0017025Hg_chrom3_TN10_19706	OG0017025Hg_chrom3_TN20_12090	OG0017025Hg_chrom3_TN22_14152	OG0017025Hg_chrom3_TN7_14279	OG0017025Hg_chrom3_TN8_13507	OG0017025chr3X12_15776
OG0006348	OG0011794Hg_chrom3_MM26_18676	OG0011794Hg_chrom3_OP50_11307	OG0011794Hg_chrom3_PA3_14645	OG0011794Hg_chrom3_TN10_19663	OG0011794Hg_chrom3_TN20_12119	OG0011794Hg_chrom3_TN22_14195	OG0011794Hg_chrom3_TN7_14314	OG0011794Hg_chrom3_TN8_13537	OG0011794chr3X12_15743
OG0006349	Hg_chrom3_TN8_13539	OG0008626Hg_chrom3_MM26_18681	OG0008626Hg_chrom3_OP50_11310	OG0008626Hg_chrom3_PA3_14650	OG0008626Hg_chrom3_TN10_19659	OG0008626Hg_chrom3_TN20_12122	OG0008626Hg_chrom3_TN22_14200	OG0008626Hg_chrom3_TN7_14320	OG0008626chr3X12_15740
OG0006350	OG0017028Hg_chrom3_MM26_18683	OG0017028Hg_chrom3_OP50_11311	OG0017028Hg_chrom3_PA3_14652	OG0017028Hg_chrom3_TN10_19658	OG0017028Hg_chrom3_TN20_12123	OG0017028Hg_chrom3_TN22_14202	OG0017028Hg_chrom3_TN7_14321	OG0017028Hg_chrom3_TN8_13541	OG0017028chr3X12_15739
OG0006351	OG0014808Hg_chrom3_MM26_18687	OG0014808Hg_chrom3_OP50_11316	OG0014808Hg_chrom3_PA3_14656	OG0014808Hg_chrom3_TN10_19646	OG0014808Hg_chrom3_TN20_12127	OG0014808Hg_chrom3_TN22_14207	OG0014808Hg_chrom3_TN7_14326	OG0014808Hg_chrom3_TN8_13546	OG0014808chr3X12_15733
OG0006352	OG0017030Hg_chrom3_MM26_18691	OG0017030Hg_chrom3_PA3_14660	OG0017030Hg_chrom3_TN10_19643	OG0017030Hg_chrom3_TN20_12131	OG0017030chr3X12_15730	OG0030745Hg_chrom3_OP50_11321	OG0030745Hg_chrom3_TN22_14212	OG0030745Hg_chrom3_TN7_14331	OG0030745Hg_chrom3_TN8_13551
OG0006353	OG0000528Hg_chrom3_MM26_18780	OG0000528Hg_chrom3_OP50_11385	OG0000528Hg_chrom3_PA3_14731	OG0000528Hg_chrom3_TN10_19587	OG0000528Hg_chrom3_TN20_12173	OG0000528Hg_chrom3_TN22_14279	OG0000528Hg_chrom3_TN7_14400	OG0000528Hg_chrom3_TN8_13594	OG0000528chr3X12_15671
OG0006356	OG0003587Hg_chrom3_MM26_18835	OG0003587Hg_chrom3_OP50_11438	OG0003587Hg_chrom3_PA3_14785	OG0003587Hg_chrom3_TN10_19511	OG0003587Hg_chrom3_TN20_12231	OG0003587Hg_chrom3_TN22_14367	OG0003587Hg_chrom3_TN7_14469	OG0003587Hg_chrom3_TN8_13704	OG0003587chr3X12_15614
OG0006357	Hg_chrom3_TN8_13705	OG0005212Hg_chrom3_MM26_18838	OG0005212Hg_chrom3_OP50_11441	OG0005212Hg_chrom3_PA3_14786	OG0005212Hg_chrom3_TN10_19506	OG0005212Hg_chrom3_TN20_12233	OG0005212Hg_chrom3_TN22_14368	OG0005212Hg_chrom3_TN7_14471	OG0005212chr3X12_15609
OG0006358	Hg_chrom3_PA3_14791	OG0017039Hg_chrom3_MM26_18842	OG0017039Hg_chrom3_OP50_11445	OG0017039Hg_chrom3_TN10_19504	OG0017039Hg_chrom3_TN20_12238	OG0017039Hg_chrom3_TN22_14373	OG0017039Hg_chrom3_TN7_14479	OG0017039Hg_chrom3_TN8_13713	OG0017039chr3X12_15607
OG0006359	OG0007684Hg_chrom3_MM26_18850	OG0007684Hg_chrom3_PA3_14799	OG0007684Hg_chrom3_TN10_19494	OG0007684Hg_chrom3_TN20_12244	OG0007684chr3X12_15601	OG0012620Hg_chrom3_OP50_11447	OG0012620Hg_chrom3_TN22_14375	OG0012620Hg_chrom3_TN7_14484	OG0012620Hg_chrom3_TN8_13717
OG0006360	OG0014810Hg_chrom3_MM26_18868	OG0014810Hg_chrom3_OP50_11458	OG0014810Hg_chrom3_PA3_14822	OG0014810Hg_chrom3_TN10_19468	OG0014810Hg_chrom3_TN20_12259	OG0014810Hg_chrom3_TN22_14399	OG0014810Hg_chrom3_TN7_14507	OG0014810Hg_chrom3_TN8_13743	OG0014810chr3X12_15584
OG0006361	OG0014812Hg_chrom3_MM26_18878	OG0014812Hg_chrom3_OP50_11466	OG0014812Hg_chrom3_PA3_14828	OG0014812Hg_chrom3_TN10_19459	OG0014812Hg_chrom3_TN20_12266	OG0014812Hg_chrom3_TN22_14404	OG0014812Hg_chrom3_TN7_14512	OG0014812Hg_chrom3_TN8_13747	OG0014812chr3X12_15575
OG0006362	OG0017040Hg_chrom3_MM26_18879	OG0017040Hg_chrom3_OP50_11468	OG0017040Hg_chrom3_PA3_14829	OG0017040Hg_chrom3_TN10_19457	OG0017040Hg_chrom3_TN20_12267	OG0017040Hg_chrom3_TN22_14405	OG0017040Hg_chrom3_TN7_14513	OG0017040Hg_chrom3_TN8_13748	chr3X12_15572
OG0006363	OG0011798Hg_chrom3_MM26_18881	OG0011798Hg_chrom3_OP50_11473	OG0011798Hg_chrom3_PA3_14831	OG0011798Hg_chrom3_TN10_19455	OG0011798Hg_chrom3_TN20_12270	OG0011798Hg_chrom3_TN22_14409	OG0011798Hg_chrom3_TN7_14515	OG0011798Hg_chrom3_TN8_13751	OG0011798chr3X12_15570
OG0006364	OG0008630Hg_chrom3_MM26_18886	OG0008630Hg_chrom3_OP50_11479	OG0008630Hg_chrom3_TN10_19447	OG0008630Hg_chrom3_TN20_12275	OG0008630Hg_chrom3_TN7_14520	OG0008630chr3X12_15563	OG0026088Hg_chrom3_PA3_14839	OG0026088Hg_chrom3_TN22_14415	OG0026088Hg_chrom3_TN8_13757
OG0006365	Hg_chrom3_OP50_11484	OG0014813Hg_chrom3_MM26_18893	OG0014813Hg_chrom3_PA3_14850	OG0014813Hg_chrom3_TN20_12281	OG0014813Hg_chrom3_TN22_14422	OG0014813Hg_chrom3_TN7_14531	OG0014813Hg_chrom3_TN8_13762	OG0014813chr3X12_15555	OG0041232Hg_chrom3_TN10_19439
OG0006366	OG0013162Hg_chrom3_MM26_18907	OG0013162Hg_chrom3_OP50_11499	OG0013162Hg_chrom3_PA3_14862	OG0013162Hg_chrom3_TN10_19422	OG0013162Hg_chrom3_TN20_12293	OG0013162Hg_chrom3_TN22_14436	OG0013162Hg_chrom3_TN7_14543	OG0013162Hg_chrom3_TN8_13775	OG0013162chr3X12_15537
OG0006367	OG0014814Hg_chrom3_MM26_18908	OG0014814Hg_chrom3_OP50_11500	OG0014814Hg_chrom3_PA3_14863	OG0014814Hg_chrom3_TN10_19421	OG0014814Hg_chrom3_TN22_14437	OG0014814Hg_chrom3_TN7_14546	OG0014814Hg_chrom3_TN8_13776	OG0014814chr3X12_15536	OG0014815Hg_chrom3_TN20_12296
OG0006368	OG0013163Hg_chrom3_MM26_18926	OG0013163Hg_chrom3_OP50_11520	OG0013163Hg_chrom3_PA3_14878	OG0013163Hg_chrom3_TN10_19394	OG0013163Hg_chrom3_TN20_12314	OG0013163Hg_chrom3_TN22_14456	OG0013163Hg_chrom3_TN7_14563	OG0013163Hg_chrom3_TN8_13794	OG0013163chr3X12_15453
OG0006369	OG0014816Hg_chrom3_MM26_18961	OG0014816Hg_chrom3_OP50_11548	OG0014816Hg_chrom3_PA3_14911	OG0014816Hg_chrom3_TN10_19350	OG0014816Hg_chrom3_TN20_12339	OG0014816Hg_chrom3_TN22_14493	OG0014816Hg_chrom3_TN7_14601	OG0014816Hg_chrom3_TN8_13831	OG0014816chr3X12_15423
OG0006370	OG0007687Hg_chrom3_MM26_18962	OG0007687Hg_chrom3_OP50_11549	OG0007687Hg_chrom3_PA3_14912	OG0007687Hg_chrom3_TN10_19348	OG0007687Hg_chrom3_TN20_12340	OG0007687Hg_chrom3_TN22_14494	OG0007687Hg_chrom3_TN7_14602	OG0007687Hg_chrom3_TN8_13832	OG0007687chr3X12_15419
OG0006372	OG0014818Hg_chrom3_MM26_19005	OG0014818Hg_chrom3_OP50_11570	OG0014818Hg_chrom3_PA3_14943	OG0014818Hg_chrom3_TN10_19307	OG0014818Hg_chrom3_TN20_12363	OG0014818Hg_chrom3_TN22_14525	OG0014818Hg_chrom3_TN7_14632	OG0014818Hg_chrom3_TN8_13865	OG0014818chr3X12_15393
OG0006373	OG0010668Hg_chrom3_MM26_19006	OG0010668Hg_chrom3_OP50_11573	OG0010668Hg_chrom3_PA3_14944	OG0010668Hg_chrom3_TN10_19305	OG0010668Hg_chrom3_TN20_12364	OG0010668Hg_chrom3_TN22_14526	OG0010668Hg_chrom3_TN7_14633	OG0010668Hg_chrom3_TN8_13866	OG0010668chr3X12_15391
OG0006374	OG0000060Hg_chrom3_MM26_19018	OG0000060Hg_chrom3_OP50_11582	OG0000060Hg_chrom3_PA3_14948	OG0000060Hg_chrom3_TN10_19288	OG0000060Hg_chrom3_TN20_12373	OG0000060Hg_chrom3_TN22_14531	OG0000060Hg_chrom3_TN7_14642	OG0000060Hg_chrom3_TN8_13873	OG0000060chr3X12_15376
OG0006375	OG0010669Hg_chrom3_MM26_19021	OG0010669Hg_chrom3_OP50_11592	OG0010669Hg_chrom3_PA3_14959	OG0010669Hg_chrom3_TN10_19282	OG0010669Hg_chrom3_TN20_12376	OG0010669Hg_chrom3_TN22_14542	OG0010669Hg_chrom3_TN7_14654	OG0010669Hg_chrom3_TN8_13884	OG0010669chr3X12_15373
OG0006376	OG0017048Hg_chrom3_MM26_19038	OG0017048Hg_chrom3_OP50_11609	OG0017048Hg_chrom3_PA3_14981	OG0017048Hg_chrom3_TN10_19268	OG0017048Hg_chrom3_TN22_14580	OG0017048Hg_chrom3_TN7_14675	OG0017048Hg_chrom3_TN8_13925	OG0017048chr3X12_15353	OG0017049Hg_chrom3_TN20_12387
OG0006377	Hg_chrom3_TN20_12396	OG0005216Hg_chrom3_MM26_19047	OG0005216Hg_chrom3_OP50_11625	OG0005216Hg_chrom3_PA3_14993	OG0005216Hg_chrom3_TN10_19259	OG0005216Hg_chrom3_TN22_14572	OG0005216Hg_chrom3_TN7_14690	OG0005216Hg_chrom3_TN8_13916	OG0005216chr3X12_15344
OG0006378	OG0000654Hg_chrom3_MM26_19051	OG0000654Hg_chrom3_OP50_11629	OG0000654Hg_chrom3_PA3_14996	OG0000654Hg_chrom3_TN20_12399	OG0000654Hg_chrom3_TN22_14565	OG0000654Hg_chrom3_TN7_14695	OG0000654Hg_chrom3_TN8_13909	OG0000654chr3X12_15339	OG0028743Hg_chrom3_TN10_19254
OG0006379	OG0014820Hg_chrom3_MM26_19080	OG0014820Hg_chrom3_OP50_11661	OG0014820Hg_chrom3_PA3_15023	OG0014820Hg_chrom3_TN10_19221	OG0014820Hg_chrom3_TN20_12423	OG0014820Hg_chrom3_TN22_14599	OG0014820Hg_chrom3_TN7_14731	OG0014820Hg_chrom3_TN8_13972	OG0014820chr3X12_15302
OG0006380	OG0000927Hg_chrom3_MM26_19083	OG0000927Hg_chrom3_OP50_11665	OG0000927Hg_chrom3_PA3_15024	OG0000927Hg_chrom3_TN10_19218	OG0000927Hg_chrom3_TN20_12427	OG0000927Hg_chrom3_TN22_14600	OG0000927Hg_chrom3_TN7_14734	OG0000927Hg_chrom3_TN8_13976	OG0000927chr3X12_15297
OG0006381	OG0009612Hg_chrom3_MM26_19088	OG0009612Hg_chrom3_OP50_11675	OG0009612Hg_chrom3_PA3_15032	OG0009612Hg_chrom3_TN10_19210	OG0009612Hg_chrom3_TN20_12434	OG0009612Hg_chrom3_TN22_14609	OG0009612Hg_chrom3_TN7_14740	OG0009612Hg_chrom3_TN8_13981	OG0009612chr3X12_15292
OG0006382	OG0019874Hg_chrom3_MM26_19093	OG0019874Hg_chrom3_OP50_11681	OG0019874Hg_chrom3_TN10_19206	OG0019874Hg_chrom3_TN20_12440	OG0019874Hg_chrom3_TN22_14613	OG0019874Hg_chrom3_TN8_13985	OG0019874chr3X12_15284	OG0019875Hg_chrom3_PA3_15038	OG0019875Hg_chrom3_TN7_14745
OG0006383	OG0007693Hg_chrom3_PA3_15040	OG0007693Hg_chrom3_TN10_19205	OG0007693Hg_chrom3_TN22_14615	OG0007693Hg_chrom3_TN7_14746	OG0007693Hg_chrom3_TN8_13987	OG0019876Hg_chrom3_MM26_19095	OG0019876Hg_chrom3_OP50_11684	OG0019876Hg_chrom3_TN20_12442	chr3X12_15283
OG0006384	OG0008634Hg_chrom3_MM26_19099	OG0008634Hg_chrom3_OP50_11688	OG0008634Hg_chrom3_TN10_19198	OG0008634Hg_chrom3_TN20_12447	OG0008634Hg_chrom3_TN7_14747	OG0012688Hg_chrom3_TN22_14618	OG0012688chr3X12_15279	OG0039990Hg_chrom3_PA3_15043	OG0039990Hg_chrom3_TN8_13988
OG0006385	OG0004578Hg_chrom3_MM26_19102	OG0004578Hg_chrom3_OP50_11692	OG0004578Hg_chrom3_PA3_15047	OG0004578Hg_chrom3_TN10_19194	OG0004578Hg_chrom3_TN20_12451	OG0004578Hg_chrom3_TN22_14622	OG0004578Hg_chrom3_TN7_14752	OG0004578Hg_chrom3_TN8_13993	OG0004578chr3X12_15276
OG0006386	Hg_chrom3_TN7_14756	OG0009613Hg_chrom3_MM26_19104	OG0009613Hg_chrom3_PA3_15049	OG0009613Hg_chrom3_TN10_19193	OG0009613Hg_chrom3_TN22_14625	OG0009613chr3X12_15272	OG0011411Hg_chrom3_TN8_13996	OG0039014Hg_chrom3_OP50_11695	OG0039014Hg_chrom3_TN20_12454
OG0006388	OG0014821Hg_chrom3_MM26_19134	OG0014821Hg_chrom3_PA3_15068	OG0014821Hg_chrom3_TN10_19162	OG0014821Hg_chrom3_TN20_12472	OG0014821Hg_chrom3_TN22_14646	OG0014821Hg_chrom3_TN7_14777	OG0014821Hg_chrom3_TN8_14019	OG0014821chr3X12_15251	OG0017055Hg_chrom3_OP50_11717
OG0006389	OG0005218Hg_chrom3_MM26_19136	OG0005218Hg_chrom3_OP50_11719	OG0005218Hg_chrom3_PA3_15070	OG0005218Hg_chrom3_TN10_19158	OG0005218Hg_chrom3_TN20_12475	OG0005218Hg_chrom3_TN22_14648	OG0005218Hg_chrom3_TN7_14780	OG0005218Hg_chrom3_TN8_14022	OG0005218chr3X12_15248
OG0006390	OG0001808Hg_chrom3_MM26_19142	OG0001808Hg_chrom3_OP50_11724	OG0001808Hg_chrom3_PA3_15076	OG0001808Hg_chrom3_TN10_19150	OG0001808Hg_chrom3_TN20_12483	OG0001808Hg_chrom3_TN22_14654	OG0001808Hg_chrom3_TN7_14785	OG0001808Hg_chrom3_TN8_14028	OG0001808chr3X12_15241
OG0006391	Hg_chrom3_MM26_19146	OG0001620Hg_chrom3_TN7_14793	OG0017056Hg_chrom3_OP50_11730	OG0017056Hg_chrom3_PA3_15080	OG0017056Hg_chrom3_TN10_19148	OG0017056Hg_chrom3_TN20_12487	OG0017056Hg_chrom3_TN22_14659	OG0017056Hg_chrom3_TN8_14033	OG0017056chr3X12_15238
OG0006393	Hg_chrom3_TN8_14078	OG0003590Hg_chrom3_MM26_19196	OG0003590Hg_chrom3_OP50_11764	OG0003590Hg_chrom3_PA3_15122	OG0003590Hg_chrom3_TN10_19112	OG0003590Hg_chrom3_TN20_12524	OG0003590Hg_chrom3_TN22_14708	OG0003590Hg_chrom3_TN7_14842	OG0003590chr3X12_14910
OG0006394	Hg_chrom3_MM26_19201	OG0006742Hg_chrom3_PA3_15125	OG0006742Hg_chrom3_TN10_19107	OG0006742Hg_chrom3_TN20_12526	OG0006742Hg_chrom3_TN22_14714	OG0006742Hg_chrom3_TN7_14847	OG0006742chr3X12_14915	OG0039016Hg_chrom3_OP50_11765	OG0039016Hg_chrom3_TN8_14081
OG0006395	OG0011803Hg_chrom3_MM26_19205	OG0011803Hg_chrom3_TN7_14851	OG0011803chr3X12_14920	OG0017057Hg_chrom3_OP50_11771	OG0017057Hg_chrom3_PA3_15130	OG0017057Hg_chrom3_TN20_12528	OG0017057Hg_chrom3_TN22_14717	OG0017057Hg_chrom3_TN8_14085	OG0028064Hg_chrom3_TN10_19103
OG0006396	OG0001027Hg_chrom3_MM26_19211	OG0001027Hg_chrom3_OP50_11780	OG0001027Hg_chrom3_PA3_15139	OG0001027Hg_chrom3_TN10_19094	OG0001027Hg_chrom3_TN20_12533	OG0001027Hg_chrom3_TN22_14728	OG0001027Hg_chrom3_TN8_14094	OG0005220Hg_chrom3_TN7_14857	OG0005220chr3X12_14924
OG0006398	OG0004045Hg_chrom3_MM26_19256	OG0004045Hg_chrom3_PA3_15215	OG0004045Hg_chrom3_TN10_19021	OG0004045Hg_chrom3_TN20_12581	OG0004045Hg_chrom3_TN22_14767	OG0004045Hg_chrom3_TN7_14912	OG0004045Hg_chrom3_TN8_14143	OG0004045chr3X12_15154	OG0012624Hg_chrom3_OP50_11822
OG0006399	OG0014824Hg_chrom3_MM26_19258	OG0014824Hg_chrom3_OP50_11826	OG0014824Hg_chrom3_PA3_15218	OG0014824Hg_chrom3_TN10_19020	OG0014824Hg_chrom3_TN20_12582	OG0014824Hg_chrom3_TN22_14770	OG0014824Hg_chrom3_TN7_14913	OG0014824Hg_chrom3_TN8_14146	OG0014824chr3X12_15151
OG0006405	OG0008639Hg_chrom3_MM26_19361	OG0008639Hg_chrom3_OP50_11886	OG0008639Hg_chrom3_PA3_15301	OG0008639Hg_chrom3_TN10_18947	OG0008639Hg_chrom3_TN20_12655	OG0008639Hg_chrom3_TN22_14852	OG0008639Hg_chrom3_TN7_14996	OG0008639Hg_chrom3_TN8_14224	OG0008639chr3X12_15087
OG0006406	OG0004046Hg_chrom3_MM26_19378	OG0004046Hg_chrom3_OP50_11912	OG0004046Hg_chrom3_PA3_15316	OG0004046Hg_chrom3_TN10_18927	OG0004046Hg_chrom3_TN20_12672	OG0004046Hg_chrom3_TN22_14871	OG0004046Hg_chrom3_TN7_15014	OG0004046Hg_chrom3_TN8_14239	OG0004046chr3X12_15071
OG0006407	OG0002254Hg_chrom3_MM26_19415	OG0002254Hg_chrom3_OP50_11936	OG0002254Hg_chrom3_PA3_15343	OG0002254Hg_chrom3_TN10_18907	OG0002254Hg_chrom3_TN20_12698	OG0002254Hg_chrom3_TN7_15042	OG0002254Hg_chrom3_TN8_14272	OG0002254chr3X12_15042	OG0036267Hg_chrom3_TN22_14902
OG0006408	OG0002255Hg_chrom3_MM26_19419	OG0002255Hg_chrom3_OP50_11939	OG0002255Hg_chrom3_PA3_15349	OG0002255Hg_chrom3_TN10_18904	OG0002255Hg_chrom3_TN20_12701	OG0002255Hg_chrom3_TN22_14904	OG0002255Hg_chrom3_TN7_15048	OG0002255Hg_chrom3_TN8_14275	OG0002255chr3X12_15041
OG0006409	OG0002868Hg_chrom3_PA3_15358	OG0014832Hg_chrom3_MM26_19435	OG0014832Hg_chrom3_TN22_14920	OG0014832Hg_chrom3_TN7_15066	OG0028741Hg_chrom3_TN10_18891	OG0028741chr3X12_15024	OG0031745Hg_chrom3_TN8_14289	OG0034184Hg_chrom3_OP50_11951	OG0034184Hg_chrom3_TN20_12712
OG0006410	OG0004047Hg_chrom3_MM26_19454	OG0004047Hg_chrom3_OP50_11970	OG0004047Hg_chrom3_PA3_15373	OG0004047Hg_chrom3_TN10_18864	OG0004047Hg_chrom3_TN20_12726	OG0004047Hg_chrom3_TN22_14944	OG0004047Hg_chrom3_TN7_15095	OG0004047Hg_chrom3_TN8_14307	OG0004047chr3X12_15011
OG0006411	OG0005226Hg_chrom3_MM26_19458	OG0005226Hg_chrom3_OP50_11971	OG0005226Hg_chrom3_PA3_15375	OG0005226Hg_chrom3_TN10_18857	OG0005226Hg_chrom3_TN20_12727	OG0005226Hg_chrom3_TN22_14947	OG0005226Hg_chrom3_TN7_15100	OG0005226Hg_chrom3_TN8_14310	OG0005226chr3X12_15006
OG0006412	OG0003199Hg_chrom3_MM26_19474	OG0003199Hg_chrom3_OP50_11982	OG0003199Hg_chrom3_PA3_15391	OG0003199Hg_chrom3_TN10_18840	OG0003199Hg_chrom3_TN20_12743	OG0003199Hg_chrom3_TN22_14966	OG0003199Hg_chrom3_TN7_15114	OG0003199Hg_chrom3_TN8_14331	OG0003199chr3X12_14991
OG0006413	OG0000820Hg_chrom3_OP50_11994	OG0000820Hg_chrom3_PA3_15409	OG0000820Hg_chrom3_TN10_18806	OG0000820Hg_chrom3_TN20_12758	OG0000820Hg_chrom3_TN7_15136	OG0000820Hg_chrom3_TN8_14355	OG0000820chr3X12_14969	OG0019897Hg_chrom3_TN22_14985	OG0037661Hg_chrom3_MM26_19493
OG0006414	Hg_chrom3_TN22_14992	OG0013174Hg_chrom3_MM26_19499	OG0013174Hg_chrom3_OP50_12000	OG0013174Hg_chrom3_PA3_15418	OG0013174Hg_chrom3_TN20_12764	OG0013174Hg_chrom3_TN8_14359	OG0024732Hg_chrom3_TN10_18801	OG0024732Hg_chrom3_TN7_15142	OG0024732chr3X12_14960
OG0006415	OG0002024Hg_chrom3_MM26_19506	OG0002024Hg_chrom3_OP50_12001	OG0002024Hg_chrom3_TN10_18797	OG0002024Hg_chrom3_TN20_12765	OG0002024Hg_chrom3_TN22_14999	OG0002024Hg_chrom3_TN7_15149	OG0002024Hg_chrom3_TN8_14365	OG0002024chr3X12_14955	OG0014836Hg_chrom3_PA3_15419
OG0006416	OG0000426Hg_chrom3_MM26_19547	OG0000426Hg_chrom3_OP50_12038	OG0000426Hg_chrom3_PA3_15456	OG0000426Hg_chrom3_TN10_18766	OG0000426Hg_chrom3_TN20_12792	OG0000426Hg_chrom3_TN22_15038	OG0000426Hg_chrom3_TN7_15185	OG0000426Hg_chrom3_TN8_14399	OG0000426chr3X12_14941
OG0006417	Hg_chrom3_OP50_12043	OG0002551Hg_chrom3_MM26_19553	OG0002551Hg_chrom3_PA3_15460	OG0002551Hg_chrom3_TN10_18763	OG0002551Hg_chrom3_TN20_12795	OG0002551Hg_chrom3_TN22_15044	OG0002551Hg_chrom3_TN7_15191	OG0002551Hg_chrom3_TN8_14406	OG0002551chr3X12_14944
OG0006418	OG0009620Hg_chrom3_OP50_12058	OG0009620Hg_chrom3_TN10_18743	OG0009620Hg_chrom3_TN20_12812	OG0009620Hg_chrom3_TN7_15207	OG0009620Hg_chrom3_TN8_14412	OG0009620chr3X12_14844	OG0019903Hg_chrom3_MM26_19569	OG0019903Hg_chrom3_PA3_15480	OG0019903Hg_chrom3_TN22_15058
OG0006419	Hg_chrom3_TN22_15066	OG0009621Hg_chrom3_MM26_19579	OG0009621Hg_chrom3_OP50_12068	OG0009621Hg_chrom3_TN10_18729	OG0009621Hg_chrom3_TN7_15217	OG0009621Hg_chrom3_TN8_14429	OG0009621chr3X12_14834	OG0017081Hg_chrom3_PA3_15487	OG0017081Hg_chrom3_TN20_12821
OG0006420	Hg_chrom3_OP50_12076	OG0003591Hg_chrom3_MM26_19587	OG0003591Hg_chrom3_PA3_15499	OG0003591Hg_chrom3_TN10_18720	OG0003591Hg_chrom3_TN20_12826	OG0003591Hg_chrom3_TN22_15080	OG0003591Hg_chrom3_TN7_15226	OG0003591Hg_chrom3_TN8_14435	OG0003591chr3X12_14822
OG0006421	OG0013176Hg_chrom3_MM26_19593	OG0013176Hg_chrom3_OP50_12082	OG0013176Hg_chrom3_PA3_15504	OG0013176Hg_chrom3_TN10_18718	OG0013176Hg_chrom3_TN20_12834	OG0013176Hg_chrom3_TN22_15085	OG0013176Hg_chrom3_TN7_15232	OG0013176Hg_chrom3_TN8_14441	chr3X12_14820
OG0006422	OG0006751Hg_chrom3_MM26_19594	OG0006751Hg_chrom3_OP50_12083	OG0006751Hg_chrom3_PA3_15507	OG0006751Hg_chrom3_TN10_18714	OG0006751Hg_chrom3_TN20_12836	OG0006751Hg_chrom3_TN22_15088	OG0006751Hg_chrom3_TN7_15234	OG0006751Hg_chrom3_TN8_14442	OG0006751chr3X12_14817
OG0006423	OG0017084Hg_chrom3_MM26_19609	OG0017084Hg_chrom3_OP50_12093	OG0017084Hg_chrom3_PA3_15516	OG0017084Hg_chrom3_TN20_12847	OG0017084Hg_chrom3_TN7_15247	OG0017084chr3X12_14801	OG0017085Hg_chrom3_TN10_18704	OG0017085Hg_chrom3_TN22_15103	OG0017085Hg_chrom3_TN8_14459
OG0006424	OG0000929Hg_chrom3_MM26_19615	OG0000929Hg_chrom3_OP50_12096	OG0000929Hg_chrom3_PA3_15520	OG0000929Hg_chrom3_TN10_18701	OG0000929Hg_chrom3_TN20_12851	OG0000929Hg_chrom3_TN22_15105	OG0000929Hg_chrom3_TN7_15251	OG0000929Hg_chrom3_TN8_14461	OG0000929chr3X12_14797
OG0006425	OG0002552Hg_chrom3_MM26_19619	OG0002552Hg_chrom3_OP50_12100	OG0002552Hg_chrom3_PA3_15523	OG0002552Hg_chrom3_TN10_18700	OG0002552Hg_chrom3_TN20_12854	OG0002552Hg_chrom3_TN22_15110	OG0002552Hg_chrom3_TN7_15256	OG0002552Hg_chrom3_TN8_14467	OG0002552chr3X12_14793
OG0006426	OG0001623Hg_chrom3_MM26_19630	OG0001623Hg_chrom3_OP50_12111	OG0001623Hg_chrom3_PA3_15538	OG0001623Hg_chrom3_TN10_18684	OG0001623Hg_chrom3_TN20_12866	OG0001623Hg_chrom3_TN22_15122	OG0001623Hg_chrom3_TN7_15270	OG0001623Hg_chrom3_TN8_14482	OG0001623chr3X12_14775
OG0006427	OG0005958Hg_chrom3_MM26_19633	OG0005958Hg_chrom3_OP50_12115	OG0005958Hg_chrom3_PA3_15542	OG0005958Hg_chrom3_TN10_18677	OG0005958Hg_chrom3_TN20_12868	OG0005958Hg_chrom3_TN22_15126	OG0005958Hg_chrom3_TN7_15273	OG0005958Hg_chrom3_TN8_14484	OG0005958chr3X12_14772
OG0006429	OG0009625Hg_chrom3_MM26_19671	OG0009625Hg_chrom3_OP50_12198	OG0009625Hg_chrom3_PA3_15592	OG0009625Hg_chrom3_TN10_18615	OG0009625Hg_chrom3_TN20_12893	OG0009625Hg_chrom3_TN22_15166	OG0009625Hg_chrom3_TN7_15310	OG0009625Hg_chrom3_TN8_14523	OG0009625chr3X12_14734
OG0006430	Hg_chrom3_TN22_15171	OG0007704Hg_chrom3_MM26_19681	OG0007704Hg_chrom3_OP50_12190	OG0007704Hg_chrom3_PA3_15603	OG0007704Hg_chrom3_TN10_18602	OG0007704Hg_chrom3_TN20_12901	OG0007704Hg_chrom3_TN7_15319	OG0007704Hg_chrom3_TN8_14532	OG0007704chr3X12_14725
OG0006431	Hg_chrom3_TN7_15325	OG0011812Hg_chrom3_MM26_19684	OG0011812Hg_chrom3_TN10_18599	OG0011812Hg_chrom3_TN20_12906	OG0011812chr3X12_14720	OG0017090Hg_chrom3_OP50_12186	OG0017090Hg_chrom3_PA3_15608	OG0017090Hg_chrom3_TN22_15178	OG0026451Hg_chrom3_TN8_14535
OG0006432	OG0017091Hg_chrom3_TN8_14542	OG0019912Hg_chrom3_MM26_19689	OG0019912Hg_chrom3_OP50_12183	OG0019912Hg_chrom3_TN10_18596	OG0019912Hg_chrom3_TN7_15331	OG0019912chr3X12_14715	OG0019913Hg_chrom3_PA3_15614	OG0019913Hg_chrom3_TN20_12908	OG0019913Hg_chrom3_TN22_15185
OG0006434	OG0004049Hg_chrom3_PA3_15646	OG0017095Hg_chrom3_MM26_19727	OG0017095Hg_chrom3_OP50_12213	OG0017095Hg_chrom3_TN10_18551	OG0017095Hg_chrom3_TN20_12941	OG0017095Hg_chrom3_TN22_15231	OG0017095Hg_chrom3_TN7_15370	OG0017095Hg_chrom3_TN8_14573	OG0017095chr3X12_14670
OG0006435	OG0004962Hg_chrom3_OP50_12220	OG0007706Hg_chrom3_MM26_19731	OG0007706Hg_chrom3_PA3_15652	OG0007706Hg_chrom3_TN10_18546	OG0007706Hg_chrom3_TN20_12945	OG0007706Hg_chrom3_TN22_15238	OG0007706Hg_chrom3_TN7_15375	OG0007706Hg_chrom3_TN8_14579	OG0007706chr3X12_14669
OG0006436	OG0017097Hg_chrom3_MM26_19740	OG0017097Hg_chrom3_TN22_15247	OG0017097Hg_chrom3_TN8_14590	OG0017097chr3X12_14656	OG0019918Hg_chrom3_TN10_18540	OG0019919Hg_chrom3_OP50_12231	OG0019919Hg_chrom3_PA3_15659	OG0019919Hg_chrom3_TN7_15386	OG0027024Hg_chrom3_TN20_12951
OG0006437	OG0002869Hg_chrom3_OP50_12233	OG0002869Hg_chrom3_PA3_15661	OG0002869Hg_chrom3_TN10_18535	OG0002869Hg_chrom3_TN20_12955	OG0002869Hg_chrom3_TN22_15252	OG0002869Hg_chrom3_TN7_15389	OG0002869Hg_chrom3_TN8_14594	OG0002869chr3X12_14653	OG0033019Hg_chrom3_MM26_19745
OG0006438	OG0005960Hg_chrom3_MM26_19754	OG0005960Hg_chrom3_PA3_15672	OG0005960Hg_chrom3_TN10_18526	OG0005960Hg_chrom3_TN20_12963	OG0005960Hg_chrom3_TN7_15400	OG0005960Hg_chrom3_TN8_14607	OG0005960chr3X12_14644	OG0023866Hg_chrom3_OP50_12243	OG0023866Hg_chrom3_TN22_15263
OG0006439	OG0000733Hg_chrom3_MM26_19773	OG0000733Hg_chrom3_OP50_12260	OG0000733Hg_chrom3_PA3_15700	OG0000733Hg_chrom3_TN10_18502	OG0000733Hg_chrom3_TN20_12982	OG0000733Hg_chrom3_TN22_15285	OG0000733Hg_chrom3_TN7_15424	OG0000733Hg_chrom3_TN8_14633	OG0000733chr3X12_14620
OG0006440	OG0010683Hg_chrom3_MM26_19776	OG0010683Hg_chrom3_OP50_12264	OG0010683Hg_chrom3_PA3_15703	OG0010683Hg_chrom3_TN10_18496	OG0010683Hg_chrom3_TN20_12986	OG0010683Hg_chrom3_TN7_15431	OG0010683Hg_chrom3_TN8_14635	OG0010683chr3X12_14617	OG0022572Hg_chrom3_TN22_15287
OG0006441	Hg_chrom3_PA3_15707	OG0001811Hg_chrom3_MM26_19778	OG0001811Hg_chrom3_OP50_12267	OG0001811Hg_chrom3_TN10_18488	OG0001811Hg_chrom3_TN20_12992	OG0001811Hg_chrom3_TN22_15290	OG0001811Hg_chrom3_TN7_15435	OG0001811Hg_chrom3_TN8_14638	OG0001811chr3X12_14612
OG0006442	Hg_chrom3_TN8_14643	OG0001812Hg_chrom3_MM26_19782	OG0001812Hg_chrom3_OP50_12271	OG0001812Hg_chrom3_PA3_15710	OG0001812Hg_chrom3_TN10_18485	OG0001812Hg_chrom3_TN20_12994	OG0001812Hg_chrom3_TN22_15295	OG0001812Hg_chrom3_TN7_15439	OG0001812chr3X12_14608
OG0006443	Hg_chrom3_TN8_14650	OG0002257Hg_chrom3_MM26_19786	OG0002257Hg_chrom3_OP50_12274	OG0002257Hg_chrom3_PA3_15715	OG0002257Hg_chrom3_TN10_18481	OG0002257Hg_chrom3_TN20_12996	OG0002257Hg_chrom3_TN22_15301	OG0002257chr3X12_14604	OG0019923Hg_chrom3_TN7_15444
OG0006444	OG0009626Hg_chrom3_OP50_12288	OG0009626Hg_chrom3_PA3_15734	OG0009626Hg_chrom3_TN10_18464	OG0009626Hg_chrom3_TN20_13011	OG0009626chr3X12_14587	OG0029585Hg_chrom3_MM26_19802	OG0029585Hg_chrom3_TN22_15317	OG0029585Hg_chrom3_TN7_15462	OG0029585Hg_chrom3_TN8_14664
OG0006445	OG0004051Hg_chrom3_TN10_18456	OG0004051Hg_chrom3_TN22_15324	OG0004051Hg_chrom3_TN8_14672	OG0013181Hg_chrom3_MM26_19805	OG0013181Hg_chrom3_PA3_15736	OG0013181chr3X12_14586	OG0021702Hg_chrom3_OP50_12293	OG0021702Hg_chrom3_TN20_13015	OG0021702Hg_chrom3_TN7_15467
OG0006446	OG0004052Hg_chrom3_MM26_19811	OG0004052Hg_chrom3_OP50_12295	OG0004052Hg_chrom3_PA3_15742	OG0004052Hg_chrom3_TN10_18451	OG0004052Hg_chrom3_TN20_13018	OG0004052Hg_chrom3_TN22_15327	OG0004052Hg_chrom3_TN7_15473	OG0004052Hg_chrom3_TN8_14675	OG0004052chr3X12_14582
OG0006447	OG0013182Hg_chrom3_MM26_19817	OG0013182Hg_chrom3_OP50_12300	OG0013182Hg_chrom3_PA3_15747	OG0013182Hg_chrom3_TN20_13022	OG0013182Hg_chrom3_TN7_15477	OG0013182Hg_chrom3_TN8_14680	OG0023868Hg_chrom3_TN10_18449	OG0023868Hg_chrom3_TN22_15332	OG0034189chr3X12_14580
OG0006448	Hg_chrom3_TN10_18446	OG0007708Hg_chrom3_MM26_19819	OG0007708Hg_chrom3_OP50_12303	OG0007708Hg_chrom3_PA3_15750	OG0007708Hg_chrom3_TN20_13024	OG0007708Hg_chrom3_TN22_15336	OG0007708Hg_chrom3_TN7_15481	OG0007708Hg_chrom3_TN8_14683	OG0007708chr3X12_14576
OG0006449	Hg_chrom3_OP50_12307	Hg_chrom3_PA3_15754	OG0002554Hg_chrom3_MM26_19822	OG0002554Hg_chrom3_TN10_18442	OG0002554Hg_chrom3_TN20_13027	OG0002554Hg_chrom3_TN22_15340	OG0002554Hg_chrom3_TN7_15486	OG0002554Hg_chrom3_TN8_14687	OG0002554chr3X12_14573
OG0006450	Hg_chrom3_MM26_19829	OG0006753Hg_chrom3_OP50_12311	OG0006753Hg_chrom3_PA3_15760	OG0006753Hg_chrom3_TN10_18433	OG0006753Hg_chrom3_TN20_13033	OG0006753Hg_chrom3_TN22_15352	OG0006753Hg_chrom3_TN7_15494	OG0006753Hg_chrom3_TN8_14694	OG0006753chr3X12_14564
OG0006451	OG0003201Hg_chrom3_MM26_19832	OG0003201Hg_chrom3_OP50_12320	OG0003201Hg_chrom3_PA3_15763	OG0003201Hg_chrom3_TN10_18432	OG0003201Hg_chrom3_TN20_13043	OG0003201Hg_chrom3_TN22_15355	OG0003201Hg_chrom3_TN7_15497	OG0003201Hg_chrom3_TN8_14697	OG0003201chr3X12_14562
OG0006452	OG0009627Hg_chrom3_MM26_19834	OG0009627Hg_chrom3_OP50_12323	OG0009627Hg_chrom3_PA3_15766	OG0009627Hg_chrom3_TN20_13045	OG0009627Hg_chrom3_TN22_15357	OG0009627Hg_chrom3_TN7_15500	OG0022576Hg_chrom3_TN8_14699	OG0041206Hg_chrom3_TN10_18431	OG0041206chr3X12_14561
OG0006453	OG0000734Hg_chrom3_MM26_19837	OG0000734Hg_chrom3_OP50_12328	OG0000734Hg_chrom3_PA3_15768	OG0000734Hg_chrom3_TN10_18424	OG0000734Hg_chrom3_TN20_13047	OG0000734Hg_chrom3_TN22_15361	OG0000734Hg_chrom3_TN7_15502	OG0000734Hg_chrom3_TN8_14703	OG0000734chr3X12_14554
OG0006454	OG0003202Hg_chrom3_MM26_19858	OG0003202Hg_chrom3_OP50_12344	OG0003202Hg_chrom3_PA3_15791	OG0003202Hg_chrom3_TN10_18404	OG0003202Hg_chrom3_TN20_13062	OG0003202Hg_chrom3_TN22_15384	OG0003202Hg_chrom3_TN7_15524	OG0003202Hg_chrom3_TN8_14722	OG0003202chr3X12_14533
OG0006455	OG0007709Hg_chrom3_TN8_14729	OG0017105Hg_chrom3_MM26_19862	OG0017105Hg_chrom3_OP50_12349	OG0017105Hg_chrom3_PA3_15794	OG0017105Hg_chrom3_TN10_18399	OG0017105Hg_chrom3_TN20_13066	OG0017105Hg_chrom3_TN22_15387	OG0017105Hg_chrom3_TN7_15526	OG0017105chr3X12_14529
OG0006456	OG0003203Hg_chrom3_MM26_19868	OG0003203Hg_chrom3_OP50_12345	OG0003203Hg_chrom3_PA3_15799	OG0003203Hg_chrom3_TN20_13068	OG0003203Hg_chrom3_TN22_15393	OG0003203Hg_chrom3_TN8_14730	OG0019933Hg_chrom3_TN7_15530	OG0019933chr3X12_14528	OG0031739Hg_chrom3_TN10_18398
OG0006459	OG0005963Hg_chrom3_MM26_19944	OG0005963Hg_chrom3_OP50_12403	OG0005963Hg_chrom3_PA3_15880	OG0005963Hg_chrom3_TN20_13124	OG0005963Hg_chrom3_TN7_15615	OG0005963Hg_chrom3_TN8_14814	OG0005963chr3X12_14499	OG0028739Hg_chrom3_TN10_18321	OG0028739Hg_chrom3_TN22_15483
OG0006460	Hg_chrom3_OP50_12407	OG0014848Hg_chrom3_MM26_19946	OG0014848Hg_chrom3_PA3_15882	OG0014848Hg_chrom3_TN10_18320	OG0014848Hg_chrom3_TN20_13126	OG0014848chr3X12_14497	OG0036276Hg_chrom3_TN7_15619	OG0042704Hg_chrom3_TN22_15486	OG0042704Hg_chrom3_TN8_14819
OG0006461	Hg_chrom3_TN22_15497	OG0013185Hg_chrom3_MM26_19960	OG0013185Hg_chrom3_OP50_12415	OG0013185Hg_chrom3_PA3_15895	OG0013185Hg_chrom3_TN10_18304	OG0013185Hg_chrom3_TN20_13136	OG0013185Hg_chrom3_TN7_15629	OG0013185Hg_chrom3_TN8_14830	OG0024747chr3X12_14482
OG0006463	OG0017113Hg_chrom3_MM26_19984	OG0017113Hg_chrom3_OP50_12442	OG0017113Hg_chrom3_PA3_15916	OG0017113Hg_chrom3_TN10_18284	OG0017113Hg_chrom3_TN20_13155	OG0017113Hg_chrom3_TN22_15526	OG0017113Hg_chrom3_TN7_15650	OG0017113Hg_chrom3_TN8_14860	OG0017113chr3X12_14454
OG0006464	OG0004587Hg_chrom3_MM26_19995	OG0004587Hg_chrom3_OP50_12450	OG0004587Hg_chrom3_PA3_15927	OG0004587Hg_chrom3_TN10_18268	OG0004587Hg_chrom3_TN20_13163	OG0004587Hg_chrom3_TN22_15537	OG0004587Hg_chrom3_TN7_15660	OG0004587Hg_chrom3_TN8_14870	OG0004587chr3X12_14444
OG0006465	OG0008653Hg_chrom3_MM26_20000	OG0008653Hg_chrom3_OP50_12452	OG0008653Hg_chrom3_PA3_15931	OG0008653Hg_chrom3_TN10_18264	OG0008653Hg_chrom3_TN20_13167	OG0008653Hg_chrom3_TN22_15541	OG0008653Hg_chrom3_TN7_15664	OG0008653Hg_chrom3_TN8_14874	OG0008653chr3X12_14440
OG0006466	OG0013186Hg_chrom3_MM26_20001	OG0013186Hg_chrom3_OP50_12453	OG0013186Hg_chrom3_PA3_15934	OG0013186Hg_chrom3_TN10_18261	OG0013186Hg_chrom3_TN20_13168	OG0013186Hg_chrom3_TN7_15667	OG0013186Hg_chrom3_TN8_14878	OG0013186chr3X12_14437	OG0019947Hg_chrom3_TN22_15543
OG0006467	OG0007713Hg_chrom3_MM26_20005	OG0007713Hg_chrom3_OP50_12457	OG0007713Hg_chrom3_PA3_15941	OG0007713Hg_chrom3_TN20_13172	OG0007713Hg_chrom3_TN7_15671	OG0007713chr3X12_14432	OG0019948Hg_chrom3_TN10_18259	OG0030762Hg_chrom3_TN22_15547	OG0030762Hg_chrom3_TN8_14880
OG0006468	OG0005964Hg_chrom3_MM26_20007	OG0005964Hg_chrom3_OP50_12459	OG0005964Hg_chrom3_PA3_15942	OG0005964Hg_chrom3_TN10_18255	OG0005964Hg_chrom3_TN20_13175	OG0005964Hg_chrom3_TN22_15551	OG0005964Hg_chrom3_TN7_15673	OG0005964Hg_chrom3_TN8_14885	OG0005964chr3X12_14430
OG0006469	OG0007714Hg_chrom3_MM26_20010	OG0007714Hg_chrom3_OP50_12460	OG0007714Hg_chrom3_PA3_15944	OG0007714Hg_chrom3_TN10_18254	OG0007714Hg_chrom3_TN20_13176	OG0007714Hg_chrom3_TN22_15552	OG0007714Hg_chrom3_TN7_15675	OG0007714Hg_chrom3_TN8_14886	OG0007714chr3X12_14427
OG0006470	OG0008654Hg_chrom3_MM26_20015	OG0008654Hg_chrom3_OP50_12470	OG0008654Hg_chrom3_TN10_18245	OG0008654Hg_chrom3_TN20_13183	OG0008654Hg_chrom3_TN7_15684	OG0008654Hg_chrom3_TN8_14894	OG0008654chr3X12_14420	OG0014852Hg_chrom3_PA3_15946	OG0026418Hg_chrom3_TN22_15554
OG0006471	OG0007715Hg_chrom3_MM26_20024	OG0007715Hg_chrom3_OP50_12472	OG0007715Hg_chrom3_PA3_15958	OG0007715Hg_chrom3_TN10_18233	OG0007715Hg_chrom3_TN20_13188	OG0007715Hg_chrom3_TN22_15567	OG0007715Hg_chrom3_TN7_15690	OG0007715Hg_chrom3_TN8_14902	OG0007715chr3X12_14411
OG0006472	OG0013187Hg_chrom3_OP50_12490	OG0013187Hg_chrom3_TN10_18223	OG0013187Hg_chrom3_TN20_13199	OG0027030Hg_chrom3_MM26_20037	OG0027030Hg_chrom3_PA3_15969	OG0027030Hg_chrom3_TN22_15584	OG0027030Hg_chrom3_TN7_15700	OG0027030Hg_chrom3_TN8_14915	chr3X12_14403
OG0006473	OG0013191Hg_chrom3_PA3_16031	OG0013191Hg_chrom3_TN20_13251	OG0013191Hg_chrom3_TN22_15624	OG0013192Hg_chrom3_MM26_20101	OG0013192Hg_chrom3_OP50_12529	OG0013192Hg_chrom3_TN10_18147	OG0013192Hg_chrom3_TN7_15763	OG0013192Hg_chrom3_TN8_14979	OG0013192chr3X12_14345
OG0006474	OG0008655Hg_chrom3_OP50_12531	OG0008655Hg_chrom3_PA3_16039	OG0008655Hg_chrom3_TN20_13255	OG0008655Hg_chrom3_TN22_15627	OG0008655Hg_chrom3_TN8_14982	OG0008655chr3X12_14343	OG0033028Hg_chrom3_MM26_20103	OG0033028Hg_chrom3_TN10_18145	OG0033028Hg_chrom3_TN7_15765
OG0006476	OG0002556Hg_chrom3_MM26_20117	OG0002556Hg_chrom3_OP50_12546	OG0002556Hg_chrom3_PA3_16048	OG0002556Hg_chrom3_TN10_18141	OG0002556Hg_chrom3_TN20_13271	OG0002556Hg_chrom3_TN22_15651	OG0002556Hg_chrom3_TN7_15788	OG0002556Hg_chrom3_TN8_14997	OG0002556chr3X12_14321
OG0006477	OG0004590Hg_chrom3_MM26_20125	OG0004590Hg_chrom3_OP50_12549	OG0004590Hg_chrom3_PA3_16051	OG0004590Hg_chrom3_TN10_18136	OG0004590Hg_chrom3_TN20_13272	OG0004590Hg_chrom3_TN22_15654	OG0004590Hg_chrom3_TN7_15793	OG0004590Hg_chrom3_TN8_15001	OG0004590chr3X12_14317
OG0006478	OG0005233Hg_chrom3_MM26_20143	OG0005233Hg_chrom3_OP50_12552	OG0005233Hg_chrom3_PA3_16067	OG0005233Hg_chrom3_TN10_18114	OG0005233Hg_chrom3_TN20_13276	OG0005233Hg_chrom3_TN22_15661	OG0005233Hg_chrom3_TN7_15796	OG0005233Hg_chrom3_TN8_15007	OG0005233chr3X12_14312
OG0006479	Hg_chrom3_OP50_12558	OG0006758Hg_chrom3_TN20_13284	OG0011821Hg_chrom3_MM26_20152	OG0011821Hg_chrom3_PA3_16075	OG0011821Hg_chrom3_TN10_18106	OG0011821Hg_chrom3_TN22_15669	OG0011821Hg_chrom3_TN7_15805	OG0011821Hg_chrom3_TN8_15016	OG0011821chr3X12_14302
OG0006480	Hg_chrom3_TN10_18096	OG0003205Hg_chrom3_MM26_20155	OG0003205Hg_chrom3_OP50_12564	OG0003205Hg_chrom3_PA3_16078	OG0003205Hg_chrom3_TN20_13287	OG0003205Hg_chrom3_TN22_15673	OG0003205Hg_chrom3_TN7_15808	OG0003205Hg_chrom3_TN8_15020	OG0003205chr3X12_14297
OG0006481	OG0007717Hg_chrom3_OP50_12567	OG0007717chr3X12_14293	OG0009633Hg_chrom3_PA3_16084	OG0013193Hg_chrom3_MM26_20161	OG0013193Hg_chrom3_TN10_18093	OG0013193Hg_chrom3_TN20_13290	OG0013193Hg_chrom3_TN22_15678	OG0013193Hg_chrom3_TN7_15813	OG0013193Hg_chrom3_TN8_15025
OG0006482	OG0010689Hg_chrom3_MM26_20169	OG0010689Hg_chrom3_OP50_12570	OG0010689Hg_chrom3_PA3_16092	OG0010689Hg_chrom3_TN10_18087	OG0010689Hg_chrom3_TN20_13293	OG0010689Hg_chrom3_TN22_15687	OG0010689Hg_chrom3_TN7_15820	OG0010689Hg_chrom3_TN8_15033	OG0010689chr3X12_14288
OG0006483	OG0017120Hg_chrom3_MM26_20170	OG0017120Hg_chrom3_OP50_12573	OG0017120Hg_chrom3_PA3_16094	OG0017120Hg_chrom3_TN10_18085	OG0017120Hg_chrom3_TN20_13295	OG0017120Hg_chrom3_TN22_15688	OG0017120Hg_chrom3_TN7_15824	OG0017120Hg_chrom3_TN8_15034	OG0017120chr3X12_14286
OG0006485	OG0017122Hg_chrom3_OP50_12588	OG0017122Hg_chrom3_PA3_16111	OG0017122Hg_chrom3_TN10_18057	OG0017122Hg_chrom3_TN20_13311	OG0017122Hg_chrom3_TN22_15710	OG0017122Hg_chrom3_TN7_15844	OG0017122Hg_chrom3_TN8_15055	OG0017122chr3X12_14266	OG0027035Hg_chrom3_MM26_20191
OG0006486	OG0009635Hg_chrom3_MM26_20193	OG0009635Hg_chrom3_OP50_12589	OG0009635Hg_chrom3_PA3_16112	OG0009635Hg_chrom3_TN10_18054	OG0009635Hg_chrom3_TN20_13312	OG0009635Hg_chrom3_TN22_15711	OG0009635Hg_chrom3_TN7_15846	OG0009635Hg_chrom3_TN8_15056	OG0009635chr3X12_14263
OG0006487	Hg_chrom3_MM26_20207	OG0004058Hg_chrom3_OP50_12603	OG0004058Hg_chrom3_PA3_16128	OG0004058Hg_chrom3_TN10_18020	OG0004058Hg_chrom3_TN20_13331	OG0004058Hg_chrom3_TN22_15727	OG0004058Hg_chrom3_TN7_15863	OG0004058Hg_chrom3_TN8_15074	OG0004058chr3X12_14248
OG0006488	OG0011822Hg_chrom3_OP50_12604	OG0011822Hg_chrom3_PA3_16130	OG0011822Hg_chrom3_TN10_18015	OG0011822Hg_chrom3_TN20_13333	OG0011822Hg_chrom3_TN22_15731	OG0011822Hg_chrom3_TN7_15867	OG0029591Hg_chrom3_TN8_15078	OG0037686Hg_chrom3_MM26_20211	OG0037686chr3X12_14244
OG0006489	OG0002872Hg_chrom3_MM26_20240	OG0002872Hg_chrom3_OP50_12622	OG0002872Hg_chrom3_PA3_16158	OG0002872Hg_chrom3_TN10_17980	OG0002872Hg_chrom3_TN20_13350	OG0002872Hg_chrom3_TN22_15747	OG0002872Hg_chrom3_TN7_15879	OG0002872Hg_chrom3_TN8_15095	OG0002872chr3X12_14223
OG0006490	OG0005236Hg_chrom3_TN10_17958	OG0005236Hg_chrom3_TN7_15900	OG0005236chr3X12_14216	OG0011823Hg_chrom3_MM26_20256	OG0011823Hg_chrom3_OP50_12638	OG0011823Hg_chrom3_PA3_16174	OG0011823Hg_chrom3_TN20_13365	OG0011823Hg_chrom3_TN22_15762	OG0011823Hg_chrom3_TN8_15114
OG0006491	OG0013198Hg_chrom3_MM26_20261	OG0013198Hg_chrom3_PA3_16180	OG0013198Hg_chrom3_TN10_17956	OG0013198Hg_chrom3_TN22_15771	OG0013198Hg_chrom3_TN7_15903	OG0013198Hg_chrom3_TN8_15120	OG0013198chr3X12_14214	OG0013199Hg_chrom3_OP50_12642	OG0013199Hg_chrom3_TN20_13371
OG0006492	OG0000473Hg_chrom3_MM26_20265	OG0000473Hg_chrom3_OP50_12643	OG0000473Hg_chrom3_PA3_16183	OG0000473Hg_chrom3_TN10_17946	OG0000473Hg_chrom3_TN20_13372	OG0000473Hg_chrom3_TN22_15779	OG0000473Hg_chrom3_TN7_15909	OG0000473Hg_chrom3_TN8_15130	OG0000473chr3X12_14209
OG0006493	OG0011824Hg_chrom3_MM26_20276	OG0011824Hg_chrom3_OP50_12653	OG0011824Hg_chrom3_TN10_17937	OG0011824Hg_chrom3_TN20_13381	OG0011824Hg_chrom3_TN22_15781	OG0011824Hg_chrom3_TN7_15919	OG0011824chr3X12_14199	OG0040024Hg_chrom3_PA3_16194	OG0040024Hg_chrom3_TN8_15136
OG0006494	OG0005237Hg_chrom3_MM26_20280	OG0005237Hg_chrom3_OP50_12655	OG0005237Hg_chrom3_PA3_16198	OG0005237Hg_chrom3_TN10_17928	OG0005237Hg_chrom3_TN20_13383	OG0005237Hg_chrom3_TN22_15788	OG0005237Hg_chrom3_TN7_15923	OG0005237Hg_chrom3_TN8_15138	chr3X12_14198
OG0006495	OG0014858Hg_chrom3_MM26_20287	OG0016161Hg_chrom3_OP50_12665	OG0016161Hg_chrom3_PA3_16206	OG0016161Hg_chrom3_TN10_17923	OG0016161Hg_chrom3_TN20_13391	OG0016161Hg_chrom3_TN22_15796	OG0016161Hg_chrom3_TN7_15932	OG0016161Hg_chrom3_TN8_15145	OG0016161chr3X12_14187
OG0006496	OG0010692Hg_chrom3_OP50_12666	OG0010692Hg_chrom3_TN10_17920	OG0010692Hg_chrom3_TN20_13393	OG0010692chr3X12_14184	OG0027036Hg_chrom3_MM26_20289	OG0027036Hg_chrom3_PA3_16209	OG0027036Hg_chrom3_TN22_15799	OG0027036Hg_chrom3_TN7_15935	OG0027036Hg_chrom3_TN8_15148
OG0006497	OG0011825Hg_chrom3_MM26_20293	OG0011825Hg_chrom3_PA3_16213	OG0011825Hg_chrom3_TN10_17917	OG0011825Hg_chrom3_TN22_15801	OG0011825Hg_chrom3_TN7_15937	OG0011825Hg_chrom3_TN8_15150	OG0011825chr3X12_14181	OG0014859Hg_chrom3_OP50_12668	OG0014859Hg_chrom3_TN20_13395
OG0006498	OG0010693Hg_chrom3_MM26_20294	OG0010693Hg_chrom3_OP50_12671	OG0010693Hg_chrom3_PA3_16214	OG0010693Hg_chrom3_TN10_17914	OG0010693Hg_chrom3_TN20_13399	OG0010693Hg_chrom3_TN22_15805	OG0010693Hg_chrom3_TN7_15941	OG0010693Hg_chrom3_TN8_15154	OG0010693chr3X12_14179
OG0006499	OG0005968Hg_chrom3_OP50_12673	OG0005968Hg_chrom3_TN20_13401	OG0029593Hg_chrom3_MM26_20296	OG0029593Hg_chrom3_PA3_16216	OG0029593Hg_chrom3_TN10_17912	OG0029593Hg_chrom3_TN7_15943	OG0036278Hg_chrom3_TN22_15807	OG0036278Hg_chrom3_TN8_15156	OG0036278chr3X12_14177
OG0006500	OG0000821Hg_chrom3_MM26_20302	OG0000821Hg_chrom3_OP50_12676	OG0000821Hg_chrom3_PA3_16222	OG0000821Hg_chrom3_TN10_17907	OG0000821Hg_chrom3_TN20_13404	OG0000821Hg_chrom3_TN22_15815	OG0000821Hg_chrom3_TN7_15950	OG0000821Hg_chrom3_TN8_15164	OG0000821chr3X12_14172
OG0006501	OG0001029Hg_chrom1_TN22_1911	OG0001029Hg_chrom3_MM26_20313	OG0001029Hg_chrom3_OP50_12680	OG0001029Hg_chrom3_PA3_16252	OG0001029Hg_chrom3_TN20_13421	OG0001029Hg_chrom3_TN7_15956	OG0001029Hg_chrom3_TN8_15174	OG0001029chr3X12_14162	OG0024760Hg_chrom3_TN10_17896
OG0006502	Hg_chrom3_OP50_12708	OG0017126Hg_chrom3_MM26_20356	OG0017126Hg_chrom3_PA3_16300	OG0017126Hg_chrom3_TN10_17846	OG0017126Hg_chrom3_TN20_13456	OG0017126Hg_chrom3_TN22_15850	OG0017126Hg_chrom3_TN7_15997	OG0017126Hg_chrom3_TN8_15220	OG0017126chr3X12_14147
OG0006503	Hg_chrom3_OP50_12714	OG0011827Hg_chrom3_PA3_16303	OG0011827Hg_chrom3_TN10_17840	OG0011827Hg_chrom3_TN22_15852	OG0014864Hg_chrom3_MM26_20363	OG0014864Hg_chrom3_TN20_13460	OG0014864Hg_chrom3_TN7_16003	OG0014864Hg_chrom3_TN8_15225	OG0014864chr3X12_14142
OG0006504	OG0008658Hg_chrom3_MM26_20372	OG0008658Hg_chrom3_OP50_12723	OG0008658Hg_chrom3_PA3_16310	OG0008658Hg_chrom3_TN10_17833	OG0008658Hg_chrom3_TN20_13467	OG0008658Hg_chrom3_TN22_15858	OG0008658Hg_chrom3_TN7_16013	OG0008658Hg_chrom3_TN8_15233	OG0008658chr3X12_14136
OG0006505	OG0003206Hg_chrom3_MM26_20380	OG0003206Hg_chrom3_PA3_16318	OG0003206Hg_chrom3_TN10_17825	OG0003206Hg_chrom3_TN22_15865	OG0003206Hg_chrom3_TN7_16019	OG0003206Hg_chrom3_TN8_15241	OG0003206chr3X12_14128	OG0004059Hg_chrom3_OP50_12732	OG0004059Hg_chrom3_TN20_13476
OG0006506	OG0006765Hg_chrom3_MM26_20386	OG0006765Hg_chrom3_OP50_12740	OG0006765Hg_chrom3_PA3_16330	OG0006765Hg_chrom3_TN10_17806	OG0006765Hg_chrom3_TN20_13482	OG0006765Hg_chrom3_TN22_15874	OG0006765Hg_chrom3_TN7_16028	OG0006765Hg_chrom3_TN8_15250	OG0006765chr3X12_14114
OG0006507	OG0013204Hg_chrom3_OP50_12744	OG0013204Hg_chrom3_PA3_16334	OG0013204Hg_chrom3_TN10_17805	OG0013204Hg_chrom3_TN20_13487	OG0013204Hg_chrom3_TN22_15877	OG0013204Hg_chrom3_TN7_16031	OG0013204Hg_chrom3_TN8_15253	OG0013204chr3X12_14112	OG0024764Hg_chrom3_MM26_20390
OG0006508	Hg_chrom3_MM26_20394	OG0011828Hg_chrom3_OP50_12741	OG0011828Hg_chrom3_PA3_16336	OG0011828Hg_chrom3_TN10_17802	OG0011828Hg_chrom3_TN20_13484	OG0011828Hg_chrom3_TN22_15879	OG0011828Hg_chrom3_TN7_16033	OG0011828Hg_chrom3_TN8_15255	OG0011828chr3X12_14108
OG0006509	OG0005969Hg_chrom3_MM26_20400	OG0005969Hg_chrom3_TN10_17796	OG0005969Hg_chrom3_TN22_15886	OG0005969Hg_chrom3_TN7_16041	OG0005969Hg_chrom3_TN8_15263	OG0030768Hg_chrom3_OP50_12754	OG0030768Hg_chrom3_PA3_16343	OG0030768Hg_chrom3_TN20_13492	OG0030768chr3X12_14100
OG0006510	OG0000930Hg_chrom3_MM26_20421	OG0000930Hg_chrom3_OP50_12770	OG0000930Hg_chrom3_PA3_16361	OG0000930Hg_chrom3_TN10_17771	OG0000930Hg_chrom3_TN20_13507	OG0000930Hg_chrom3_TN22_15922	OG0000930Hg_chrom3_TN7_16061	OG0000930Hg_chrom3_TN8_15289	OG0000930chr3X12_14079
OG0006511	OG0007356Hg_chrom3_OP50_12774	OG0007356Hg_chrom3_TN10_17764	OG0007356Hg_chrom3_TN20_13512	OG0007356Hg_chrom3_TN22_15926	OG0007356Hg_chrom3_TN7_16067	OG0007356Hg_chrom3_TN8_15293	OG0007356chr3X12_14074	OG0010696Hg_chrom3_MM26_20426	OG0010696Hg_chrom3_PA3_16368
OG0006513	OG0006766Hg_chrom3_MM26_20454	OG0006766Hg_chrom3_OP50_12802	OG0006766Hg_chrom3_PA3_16393	OG0006766Hg_chrom3_TN10_17721	OG0006766Hg_chrom3_TN20_13538	OG0006766Hg_chrom3_TN22_15953	OG0006766Hg_chrom3_TN7_16100	OG0006766Hg_chrom3_TN8_15321	OG0006766chr3X12_14042
OG0006514	OG0005241Hg_chrom3_MM26_20462	OG0005241Hg_chrom3_OP50_12810	OG0005241Hg_chrom3_PA3_16400	OG0005241Hg_chrom3_TN10_17710	OG0005241Hg_chrom3_TN20_13542	OG0005241Hg_chrom3_TN22_15962	OG0005241Hg_chrom3_TN7_16109	OG0005241Hg_chrom3_TN8_15331	OG0005241chr3X12_14034
OG0006515	OG0017135Hg_chrom3_MM26_20482	OG0017135Hg_chrom3_OP50_12825	OG0017135Hg_chrom3_PA3_16421	OG0017135Hg_chrom3_TN10_17690	OG0017135Hg_chrom3_TN20_13561	OG0017135Hg_chrom3_TN22_15978	OG0017135Hg_chrom3_TN7_16131	OG0017135Hg_chrom3_TN8_15354	OG0017135chr3X12_14016
OG0006516	OG0014874Hg_chrom3_MM26_20484	OG0014874Hg_chrom3_OP50_12827	OG0014874Hg_chrom3_PA3_16423	OG0014874Hg_chrom3_TN10_17689	OG0014874Hg_chrom3_TN20_13563	OG0014874Hg_chrom3_TN22_15980	OG0014874Hg_chrom3_TN7_16133	OG0014874Hg_chrom3_TN8_15356	OG0014874chr3X12_14015
OG0006517	OG0004061Hg_chrom3_MM26_20485	OG0004061Hg_chrom3_OP50_12828	OG0004061Hg_chrom3_PA3_16424	OG0004061Hg_chrom3_TN10_17684	OG0004061Hg_chrom3_TN20_13565	OG0004061Hg_chrom3_TN22_15982	OG0004061Hg_chrom3_TN7_16134	OG0004061Hg_chrom3_TN8_15357	OG0004061chr3X12_14014
OG0006518	OG0001254Hg_chrom3_MM26_20502	OG0001254Hg_chrom3_OP50_12850	OG0001254Hg_chrom3_PA3_16439	OG0001254Hg_chrom3_TN10_17668	OG0001254Hg_chrom3_TN20_13584	OG0001254Hg_chrom3_TN22_16001	OG0001254Hg_chrom3_TN7_16150	OG0001254Hg_chrom3_TN8_15372	OG0001254chr3X12_13996
OG0006519	Hg_chrom3_TN7_16160	OG0002262Hg_chrom3_MM26_20507	OG0002262Hg_chrom3_OP50_12855	OG0002262Hg_chrom3_PA3_16444	OG0002262Hg_chrom3_TN10_17655	OG0002262Hg_chrom3_TN20_13588	OG0002262Hg_chrom3_TN22_16007	OG0002262Hg_chrom3_TN8_15379	OG0002262chr3X12_13992
OG0006520	OG0006771Hg_chrom3_MM26_20536	OG0006771Hg_chrom3_OP50_12880	OG0006771Hg_chrom3_PA3_16472	OG0006771Hg_chrom3_TN10_17618	OG0006771Hg_chrom3_TN20_13613	OG0006771Hg_chrom3_TN22_16044	OG0006771Hg_chrom3_TN7_16188	OG0006771Hg_chrom3_TN8_15414	OG0006771chr3X12_13984
OG0006521	OG0014876Hg_chrom3_OP50_12883	OG0014876Hg_chrom3_TN20_13616	OG0022604Hg_chrom3_MM26_20538	OG0022604Hg_chrom3_PA3_16474	OG0022604Hg_chrom3_TN10_17616	OG0022604Hg_chrom3_TN22_16046	OG0022604Hg_chrom3_TN7_16192	OG0022604Hg_chrom3_TN8_15417	OG0022604chr3X12_13983
OG0006522	OG0017138Hg_chrom3_MM26_20540	OG0017138Hg_chrom3_OP50_12884	OG0017138Hg_chrom3_PA3_16476	OG0017138Hg_chrom3_TN10_17609	OG0017138Hg_chrom3_TN20_13618	OG0017138Hg_chrom3_TN22_16048	OG0017138Hg_chrom3_TN7_16194	OG0017138Hg_chrom3_TN8_15419	OG0039044chr3X12_13977
OG0006523	OG0013207Hg_chrom3_MM26_20550	OG0013207Hg_chrom3_OP50_12894	OG0013207Hg_chrom3_TN10_17603	OG0013207Hg_chrom3_TN7_16200	OG0013207Hg_chrom3_TN8_15429	OG0013207chr3X12_13968	OG0014877Hg_chrom3_PA3_16481	OG0014877Hg_chrom3_TN20_13627	OG0014877Hg_chrom3_TN22_16053
OG0006524	Hg_chrom3_OP50_12896	Hg_chrom3_TN7_16205	OG0002557Hg_chrom3_MM26_20553	OG0002557Hg_chrom3_PA3_16488	OG0002557Hg_chrom3_TN10_17597	OG0002557Hg_chrom3_TN20_13629	OG0002557Hg_chrom3_TN22_16061	OG0002557Hg_chrom3_TN8_15431	OG0026097chr3X12_13965
OG0006525	OG0002873Hg_chrom3_MM26_20557	OG0002873Hg_chrom3_OP50_12902	OG0002873Hg_chrom3_PA3_16492	OG0002873Hg_chrom3_TN10_17593	OG0002873Hg_chrom3_TN20_13633	OG0002873Hg_chrom3_TN22_16067	OG0002873Hg_chrom3_TN7_16207	OG0002873Hg_chrom3_TN8_15435	OG0002873chr3X12_13962
OG0006526	OG0002558Hg_chrom3_MM26_20563	OG0002558Hg_chrom3_OP50_12904	OG0002558Hg_chrom3_PA3_16500	OG0002558Hg_chrom3_TN20_13638	OG0002558Hg_chrom3_TN22_16071	OG0002558Hg_chrom3_TN7_16213	OG0002558Hg_chrom3_TN8_15442	OG0009642Hg_chrom3_TN10_17585	OG0009642chr3X12_13955
OG0006527	OG0008662Hg_chrom3_MM26_20570	OG0008662Hg_chrom3_OP50_12912	OG0008662Hg_chrom3_PA3_16504	OG0008662Hg_chrom3_TN10_17579	OG0008662Hg_chrom3_TN22_16078	OG0008662Hg_chrom3_TN7_16220	OG0008662Hg_chrom3_TN8_15448	OG0008662chr3X12_13948	OG0013208Hg_chrom3_TN20_13650
OG0006528	OG0013209Hg_chrom3_MM26_20579	OG0013209Hg_chrom3_OP50_12923	OG0013209Hg_chrom3_PA3_16512	OG0013209Hg_chrom3_TN10_17569	OG0013209Hg_chrom3_TN20_13657	OG0013209Hg_chrom3_TN22_16087	OG0013209Hg_chrom3_TN7_16229	OG0013209Hg_chrom3_TN8_15458	OG0013209chr3X12_13943
OG0006529	OG0014878Hg_chrom3_MM26_20584	OG0014878Hg_chrom3_OP50_12925	OG0014878Hg_chrom3_PA3_16516	OG0014878Hg_chrom3_TN10_17568	OG0014878Hg_chrom3_TN20_13660	OG0014878Hg_chrom3_TN22_16093	OG0014878Hg_chrom3_TN7_16234	OG0014878Hg_chrom3_TN8_15465	OG0014878chr3X12_13937
OG0006530	OG0007723Hg_chrom3_MM26_20589	OG0007723Hg_chrom3_PA3_16521	OG0007723Hg_chrom3_TN10_17562	OG0007723Hg_chrom3_TN22_16098	OG0007723Hg_chrom3_TN7_16240	OG0007723Hg_chrom3_TN8_15470	OG0007723chr3X12_13932	OG0039046Hg_chrom3_OP50_12928	OG0039046Hg_chrom3_TN20_13661
OG0006531	OG0002559Hg_chrom3_MM26_20590	OG0002559Hg_chrom3_OP50_12933	OG0002559Hg_chrom3_PA3_16522	OG0002559Hg_chrom3_TN10_17560	OG0002559Hg_chrom3_TN20_13665	OG0002559Hg_chrom3_TN22_16100	OG0002559Hg_chrom3_TN7_16241	OG0002559Hg_chrom3_TN8_15471	OG0002559chr3X12_13929
OG0006532	OG0002874Hg_chrom3_MM26_20606	OG0002874Hg_chrom3_OP50_12941	OG0002874Hg_chrom3_PA3_16540	OG0002874Hg_chrom3_TN10_17542	OG0002874Hg_chrom3_TN20_13673	OG0002874Hg_chrom3_TN22_16115	OG0002874Hg_chrom3_TN7_16254	OG0002874Hg_chrom3_TN8_15483	OG0002874chr3X12_13913
OG0006533	Hg_chrom3_TN22_16118	OG0017144Hg_chrom3_TN20_13679	OG0022610Hg_chrom3_MM26_20614	OG0022610Hg_chrom3_OP50_12948	OG0022610Hg_chrom3_PA3_16545	OG0022610Hg_chrom3_TN10_17535	OG0022610Hg_chrom3_TN7_16261	OG0022610Hg_chrom3_TN8_15490	OG0022610chr3X12_13906
OG0006534	Hg_chrom3_MM26_20617	Hg_chrom3_OP50_12952	OG0009644Hg_chrom3_TN10_17533	OG0009644Hg_chrom3_TN20_13680	OG0009644Hg_chrom3_TN22_16119	OG0009644Hg_chrom3_TN7_16262	OG0009644Hg_chrom3_TN8_15491	OG0009644chr3X12_13903	OG0039047Hg_chrom3_PA3_16546
OG0006535	OG0014880Hg_chrom3_OP50_12156	OG0017145Hg_chrom3_MM26_20621	OG0017145Hg_chrom3_PA3_16551	OG0017145Hg_chrom3_TN22_16127	OG0017145Hg_chrom3_TN7_16269	OG0017145Hg_chrom3_TN8_15498	OG0017145chr3X12_13901	OG0017146Hg_chrom3_TN10_17531	OG0034188Hg_chrom3_TN20_13683
OG0006536	OG0014881Hg_chrom3_MM26_20638	OG0014881Hg_chrom3_TN10_17515	OG0014881Hg_chrom3_TN20_13697	OG0019990Hg_chrom3_OP50_12968	OG0019990Hg_chrom3_PA3_16568	OG0019990Hg_chrom3_TN22_16149	OG0019990Hg_chrom3_TN7_16290	OG0019990Hg_chrom3_TN8_15515	chr3X12_13885
OG0006537	OG0002875Hg_chrom3_MM26_20641	OG0002875Hg_chrom3_OP50_12972	OG0002875Hg_chrom3_PA3_16573	OG0002875Hg_chrom3_TN10_17509	OG0002875Hg_chrom3_TN20_13699	OG0002875Hg_chrom3_TN22_16142	OG0002875Hg_chrom3_TN7_16295	OG0002875Hg_chrom3_TN8_15519	OG0002875chr3X12_13879
OG0006538	OG0011834Hg_chrom3_MM26_20644	OG0011834Hg_chrom3_OP50_12974	OG0011834Hg_chrom3_PA3_16574	OG0011834Hg_chrom3_TN20_13701	OG0019992Hg_chrom3_TN22_16152	OG0019992Hg_chrom3_TN7_16296	OG0019992Hg_chrom3_TN8_15522	OG0031730Hg_chrom3_TN10_17508	OG0031730chr3X12_13878
OG0006539	OG0010700Hg_chrom3_MM26_20653	OG0010700Hg_chrom3_OP50_12981	OG0010700Hg_chrom3_PA3_16583	OG0010700Hg_chrom3_TN10_17499	OG0010700Hg_chrom3_TN20_13707	OG0010700Hg_chrom3_TN22_16160	OG0010700Hg_chrom3_TN7_16302	OG0010700Hg_chrom3_TN8_15531	OG0010700chr3X12_13867
OG0006540	Hg_chrom3_PA3_16621	OG0000234Hg_chrom3_TN10_17449	OG0007724Hg_chrom3_MM26_20699	OG0007724Hg_chrom3_OP50_13021	OG0007724Hg_chrom3_TN20_13741	OG0007724Hg_chrom3_TN8_15577	OG0007724chr3X12_13815	OG0042713Hg_chrom3_TN22_16198	OG0042713Hg_chrom3_TN7_16350
OG0006541	OG0002560Hg_chrom3_OP50_13028	OG0002560Hg_chrom3_TN20_13747	OG0002560Hg_chrom3_TN22_16206	OG0002560Hg_chrom3_TN8_15583	OG0014884Hg_chrom3_MM26_20712	OG0014884Hg_chrom3_PA3_16629	OG0014884Hg_chrom3_TN10_17445	OG0014884chr3X12_13805	OG0031268Hg_chrom3_TN7_16366
OG0006542	OG0013213Hg_chrom3_MM26_20717	OG0013213Hg_chrom3_OP50_13030	OG0013213Hg_chrom3_PA3_16635	OG0013213Hg_chrom3_TN10_17437	OG0013213Hg_chrom3_TN20_13750	OG0013213Hg_chrom3_TN22_16209	OG0013213Hg_chrom3_TN7_16369	OG0013213Hg_chrom3_TN8_15587	OG0013213chr3X12_13798
OG0006543	OG0017153Hg_chrom3_MM26_20720	OG0017153Hg_chrom3_OP50_13032	OG0017153Hg_chrom3_PA3_16638	OG0017153Hg_chrom3_TN10_17436	OG0017153Hg_chrom3_TN20_13752	OG0017153Hg_chrom3_TN22_16210	OG0017153Hg_chrom3_TN7_16372	OG0017153Hg_chrom3_TN8_15589	OG0017153chr3X12_13797
OG0006544	OG0007725Hg_chrom3_MM26_20722	OG0007725Hg_chrom3_OP50_13033	OG0007725Hg_chrom3_PA3_16639	OG0007725Hg_chrom3_TN10_17433	OG0007725Hg_chrom3_TN20_13754	OG0007725Hg_chrom3_TN22_16212	OG0007725Hg_chrom3_TN7_16373	OG0007725Hg_chrom3_TN8_15591	OG0007725chr3X12_13795
OG0006545	OG0019995Hg_chrom3_MM26_20738	OG0026098Hg_chrom3_PA3_16653	OG0026098Hg_chrom3_TN10_17414	OG0026098Hg_chrom3_TN22_16222	OG0026098Hg_chrom3_TN7_16388	OG0026098Hg_chrom3_TN8_15602	OG0026098chr3X12_13781	OG0039049Hg_chrom3_OP50_13045	OG0039049Hg_chrom3_TN20_13767
OG0006546	OG0002876Hg_chrom3_MM26_20749	OG0002876Hg_chrom3_OP50_13052	OG0002876Hg_chrom3_PA3_16685	OG0002876Hg_chrom3_TN10_17403	OG0002876Hg_chrom3_TN20_13788	OG0002876Hg_chrom3_TN22_16256	OG0002876Hg_chrom3_TN7_16421	OG0002876Hg_chrom3_TN8_15634	OG0002876chr3X12_13768
OG0006547	OG0007726Hg_chrom3_OP50_13066	OG0007726Hg_chrom3_PA3_16665	OG0007726Hg_chrom3_TN22_16236	OG0007726Hg_chrom3_TN7_16399	OG0007726Hg_chrom3_TN8_15614	OG0029607Hg_chrom3_MM26_20779	OG0029607Hg_chrom3_TN10_17370	OG0029607Hg_chrom3_TN20_13774	OG0029607chr3X12_13735
OG0006548	OG0003209Hg_chrom3_MM26_20783	OG0003209Hg_chrom3_PA3_16667	OG0003209Hg_chrom3_TN10_17369	OG0003209Hg_chrom3_TN20_13776	OG0025816Hg_chrom3_OP50_13071	OG0025816Hg_chrom3_TN22_16241	OG0025816Hg_chrom3_TN7_16404	OG0025816Hg_chrom3_TN8_15619	OG0025816chr3X12_13729
OG0006549	OG0004064Hg_chrom3_MM26_20792	OG0004064Hg_chrom3_PA3_16676	OG0004064Hg_chrom3_TN10_17364	OG0004064Hg_chrom3_TN22_16249	OG0004064Hg_chrom3_TN7_16413	OG0004064Hg_chrom3_TN8_15627	OG0004064chr3X12_13724	OG0027052Hg_chrom3_OP50_13081	OG0027052Hg_chrom3_TN20_13785
OG0006550	OG0006775Hg_chrom3_MM26_20797	OG0006775Hg_chrom3_OP50_13082	OG0006775Hg_chrom3_PA3_16682	OG0006775Hg_chrom3_TN10_17361	OG0006775Hg_chrom3_TN20_13786	OG0006775Hg_chrom3_TN22_16253	OG0006775Hg_chrom3_TN7_16418	OG0006775Hg_chrom3_TN8_15631	OG0006775chr3X12_13721
OG0006551	OG0006776Hg_chrom3_MM26_20806	OG0006776Hg_chrom3_OP50_13106	OG0006776Hg_chrom3_PA3_16693	OG0006776Hg_chrom3_TN20_13798	OG0006776chr3X12_13707	OG0027053Hg_chrom3_TN10_17360	OG0028951Hg_chrom3_TN22_16265	OG0028951Hg_chrom3_TN7_16427	OG0028951Hg_chrom3_TN8_15643
OG0006552	Hg_chrom3_MM26_20810	OG0005974Hg_chrom3_TN10_17357	OG0005974chr3X12_13705	OG0008665Hg_chrom3_OP50_13110	OG0008665Hg_chrom3_PA3_16698	OG0008665Hg_chrom3_TN20_13800	OG0008665Hg_chrom3_TN22_16269	OG0008665Hg_chrom3_TN7_16431	OG0008665Hg_chrom3_TN8_15646
OG0006553	Hg_chrom3_TN22_16276	OG0005975Hg_chrom3_MM26_20817	OG0005975Hg_chrom3_OP50_13115	OG0005975Hg_chrom3_PA3_16703	OG0005975Hg_chrom3_TN10_17350	OG0005975Hg_chrom3_TN20_13807	OG0005975Hg_chrom3_TN7_16439	OG0005975Hg_chrom3_TN8_15654	OG0005975chr3X12_13697
OG0006554	OG0017159Hg_chrom3_MM26_20819	OG0017159Hg_chrom3_PA3_16704	OG0017159Hg_chrom3_TN10_17347	OG0017159Hg_chrom3_TN20_13808	OG0017159Hg_chrom3_TN22_16279	OG0017159chr3X12_13695	OG0025818Hg_chrom3_OP50_13119	OG0025818Hg_chrom3_TN7_16442	OG0025818Hg_chrom3_TN8_15657
OG0006555	OG0006777Hg_chrom3_PA3_16747	OG0006777Hg_chrom3_TN10_17292	OG0006777Hg_chrom3_TN20_13846	OG0006777Hg_chrom3_TN7_16479	OG0006777Hg_chrom3_TN8_15700	OG0020004Hg_chrom3_MM26_20862	OG0020004Hg_chrom3_OP50_13151	OG0020004Hg_chrom3_TN22_16370	OG0020004chr3X12_13661
OG0006556	OG0006778Hg_chrom3_OP50_13154	OG0006778Hg_chrom3_PA3_16751	OG0006778Hg_chrom3_TN20_13850	OG0006778Hg_chrom3_TN7_16484	OG0006778Hg_chrom3_TN8_15705	OG0006778chr3X12_13657	OG0013217Hg_chrom3_MM26_20865	OG0013217Hg_chrom3_TN10_17291	OG0013217Hg_chrom3_TN22_16374
OG0006557	Hg_chrom3_OP50_13156	OG0008666Hg_chrom3_TN10_17285	OG0008666Hg_chrom3_TN20_13852	OG0008666Hg_chrom3_TN22_16380	OG0008666Hg_chrom3_TN7_16489	OG0008666Hg_chrom3_TN8_15709	OG0008666chr3X12_13648	OG0037713Hg_chrom3_MM26_20869	OG0037713Hg_chrom3_PA3_16753
OG0006558	OG0010702Hg_chrom3_MM26_20876	OG0010702Hg_chrom3_OP50_13160	OG0010702Hg_chrom3_PA3_16759	OG0010702Hg_chrom3_TN10_17282	OG0010702Hg_chrom3_TN20_13855	OG0010702Hg_chrom3_TN22_16384	OG0010702Hg_chrom3_TN7_16494	OG0010702Hg_chrom3_TN8_15713	OG0010702chr3X12_13644
OG0006559	Hg_chrom3_TN10_17280	OG0017163Hg_chrom3_MM26_20877	OG0017163Hg_chrom3_OP50_13164	OG0017163Hg_chrom3_PA3_16761	OG0017163Hg_chrom3_TN20_13859	OG0017163Hg_chrom3_TN22_16387	OG0017163Hg_chrom3_TN7_16496	OG0017163Hg_chrom3_TN8_15716	OG0017163chr3X12_13643
OG0006560	OG0010703Hg_chrom3_MM26_20878	OG0010703Hg_chrom3_OP50_13165	OG0010703Hg_chrom3_PA3_16762	OG0010703Hg_chrom3_TN10_17278	OG0010703Hg_chrom3_TN20_13860	OG0010703Hg_chrom3_TN22_16388	OG0010703Hg_chrom3_TN7_16497	OG0010703Hg_chrom3_TN8_15717	OG0010703chr3X12_13640
OG0006561	OG0006779Hg_chrom3_MM26_20881	OG0006779Hg_chrom3_PA3_16764	OG0006779Hg_chrom3_TN7_16498	OG0006779Hg_chrom3_TN8_15718	OG0006779chr3X12_13637	OG0006780Hg_chrom3_OP50_13168	OG0006780Hg_chrom3_TN10_17273	OG0006780Hg_chrom3_TN20_13861	OG0006780Hg_chrom3_TN22_16391
OG0006562	OG0014893Hg_chrom3_MM26_20883	OG0014893Hg_chrom3_OP50_13170	OG0014893Hg_chrom3_PA3_16767	OG0014893Hg_chrom3_TN10_17272	OG0014893Hg_chrom3_TN20_13864	OG0014893Hg_chrom3_TN22_16392	OG0014893Hg_chrom3_TN7_16503	OG0014893Hg_chrom3_TN8_15722	OG0014893chr3X12_13635
OG0006563	Hg_chrom3_PA3_16770	OG0011840Hg_chrom3_MM26_20885	OG0011840Hg_chrom3_OP50_13171	OG0011840Hg_chrom3_TN10_17268	OG0011840Hg_chrom3_TN20_13865	OG0011840Hg_chrom3_TN22_16395	OG0011840Hg_chrom3_TN7_16504	OG0011840Hg_chrom3_TN8_15724	OG0011840chr3X12_13632
OG0006564	OG0001815Hg_chrom3_TN10_17262	OG0001815Hg_chrom3_TN7_16509	OG0001815chr3X12_13627	OG0011841Hg_chrom3_PA3_16773	OG0011841Hg_chrom3_TN22_16397	OG0011841Hg_chrom3_TN8_15726	OG0037715Hg_chrom3_MM26_20893	OG0039051Hg_chrom3_OP50_13173	OG0039051Hg_chrom3_TN20_13867
OG0006565	OG0002028Hg_chrom3_MM26_20912	OG0002028Hg_chrom3_OP50_13196	OG0002028Hg_chrom3_PA3_16798	OG0002028Hg_chrom3_TN10_17240	OG0002028Hg_chrom3_TN20_13884	OG0002028Hg_chrom3_TN22_16415	OG0002028Hg_chrom3_TN7_16526	OG0002028Hg_chrom3_TN8_15752	OG0002028chr3X12_13607
OG0006566	OG0001255Hg_chrom3_MM26_20915	OG0001255Hg_chrom3_OP50_13201	OG0001255Hg_chrom3_PA3_16800	OG0001255Hg_chrom3_TN10_17235	OG0001255Hg_chrom3_TN20_13889	OG0001255Hg_chrom3_TN22_16421	OG0001255Hg_chrom3_TN7_16530	OG0001255Hg_chrom3_TN8_15753	OG0001255chr3X12_13603
OG0006567	OG0001816Hg_chrom3_MM26_20921	OG0001816Hg_chrom3_OP50_13207	OG0001816Hg_chrom3_PA3_16807	OG0001816Hg_chrom3_TN10_17218	OG0001816Hg_chrom3_TN20_13895	OG0001816Hg_chrom3_TN22_16427	OG0001816Hg_chrom3_TN7_16536	OG0001816Hg_chrom3_TN8_15760	OG0001816chr3X12_13597
OG0006568	OG0001625Hg_chrom3_MM26_20925	OG0001625Hg_chrom3_OP50_13211	OG0001625Hg_chrom3_PA3_16810	OG0001625Hg_chrom3_TN10_17211	OG0001625Hg_chrom3_TN20_13898	OG0001625Hg_chrom3_TN22_16430	OG0001625Hg_chrom3_TN7_16540	OG0001625Hg_chrom3_TN8_15763	OG0001625chr3X12_13591
OG0006569	OG0005976Hg_chrom3_MM26_20951	OG0005976Hg_chrom3_OP50_13234	OG0005976Hg_chrom3_PA3_16838	OG0005976Hg_chrom3_TN10_17185	OG0005976Hg_chrom3_TN20_13931	OG0005976Hg_chrom3_TN22_16463	OG0005976Hg_chrom3_TN7_16576	OG0005976Hg_chrom3_TN8_15793	chr3X12_13564
OG0006570	OG0000248Hg_chrom3_MM26_20959	OG0000248Hg_chrom3_OP50_13246	OG0000248Hg_chrom3_PA3_16845	OG0000248Hg_chrom3_TN10_17172	OG0000248Hg_chrom3_TN20_13941	OG0000248Hg_chrom3_TN22_16472	OG0000248Hg_chrom3_TN7_16583	OG0000248Hg_chrom3_TN8_15804	OG0000248chr3X12_13552
OG0006571	OG0000591Hg_chrom3_MM26_20968	OG0000591Hg_chrom3_OP50_13249	OG0000591Hg_chrom3_PA3_16854	OG0000591Hg_chrom3_TN10_17167	OG0000591Hg_chrom3_TN20_13944	OG0000591Hg_chrom3_TN22_16480	OG0000591Hg_chrom3_TN7_16591	OG0000591Hg_chrom3_TN8_15811	OG0000591chr3X12_13545
OG0006572	OG0003211Hg_chrom3_MM26_20976	OG0003211Hg_chrom3_OP50_13254	OG0003211Hg_chrom3_PA3_16861	OG0003211Hg_chrom3_TN20_13950	OG0003211Hg_chrom3_TN22_16488	OG0003211Hg_chrom3_TN8_15822	OG0003211chr3X12_13537	OG0035492Hg_chrom3_TN10_17146	OG0035492Hg_chrom3_TN7_16599
OG0006573	OG0009648Hg_chrom3_MM26_20997	OG0009648Hg_chrom3_OP50_13267	OG0009648Hg_chrom3_PA3_16878	OG0009648Hg_chrom3_TN10_17124	OG0009648Hg_chrom3_TN20_13962	OG0009648Hg_chrom3_TN22_16508	OG0009648Hg_chrom3_TN7_16619	OG0009648Hg_chrom3_TN8_15842	OG0009648chr3X12_13517
OG0006574	Hg_chrom3_TN10_17115	OG0007728Hg_chrom3_OP50_13269	OG0007728Hg_chrom3_PA3_16885	OG0007728Hg_chrom3_TN22_16515	OG0007728Hg_chrom3_TN8_15844	OG0007728chr3X12_13511	OG0009257Hg_chrom3_TN20_13966	OG0009257Hg_chrom3_TN7_16625	OG0011842Hg_chrom3_MM26_21001
OG0006575	OG0002264Hg_chrom3_MM26_21003	OG0002264Hg_chrom3_OP50_13274	OG0002264Hg_chrom3_PA3_16889	OG0002264Hg_chrom3_TN10_17113	OG0002264Hg_chrom3_TN20_13969	OG0002264Hg_chrom3_TN22_16520	OG0002264Hg_chrom3_TN7_16628	OG0002264Hg_chrom3_TN8_15851	OG0002264chr3X12_13507
OG0006576	OG0001422Hg_chrom3_MM26_21006	OG0001422Hg_chrom3_OP50_13276	OG0001422Hg_chrom3_PA3_16895	OG0001422Hg_chrom3_TN10_17110	OG0001422Hg_chrom3_TN20_13971	OG0001422Hg_chrom3_TN22_16525	OG0001422Hg_chrom3_TN7_16632	OG0001422Hg_chrom3_TN8_15856	OG0001422chr3X12_13504
OG0006577	OG0002030Hg_chrom3_MM26_21009	OG0002030Hg_chrom3_OP50_13278	OG0002030Hg_chrom3_PA3_16896	OG0002030Hg_chrom3_TN10_17099	OG0002030Hg_chrom3_TN20_13973	OG0002030Hg_chrom3_TN22_16526	OG0002030Hg_chrom3_TN7_16636	OG0002030Hg_chrom3_TN8_15859	OG0002030chr3X12_13497
OG0006578	OG0008667Hg_chrom3_MM26_21024	OG0008667Hg_chrom3_OP50_13285	OG0008667Hg_chrom3_PA3_16912	OG0008667Hg_chrom3_TN10_17083	OG0008667Hg_chrom3_TN20_13987	OG0008667Hg_chrom3_TN22_16542	OG0008667Hg_chrom3_TN7_16647	OG0008667Hg_chrom3_TN8_15873	OG0008667chr3X12_13476
OG0006579	OG0000529Hg_chrom3_MM26_21026	OG0000529Hg_chrom3_OP50_13290	OG0000529Hg_chrom3_PA3_16913	OG0000529Hg_chrom3_TN10_17078	OG0000529Hg_chrom3_TN20_13992	OG0000529Hg_chrom3_TN22_16544	OG0000529chr3X12_13473	OG0029002Hg_chrom3_TN7_16649	OG0029002Hg_chrom3_TN8_15874
OG0006580	OG0002265Hg_chrom3_MM26_21064	OG0002265Hg_chrom3_OP50_13317	OG0002265Hg_chrom3_PA3_16956	OG0002265Hg_chrom3_TN10_17038	OG0019222Hg_chrom3_TN22_16584	OG0019222Hg_chrom3_TN7_16686	OG0019222Hg_chrom3_TN8_15914	OG0028915Hg_chrom3_TN20_14021	OG0028915chr3X12_13439
OG0006581	OG0008668Hg_chrom3_MM26_21069	OG0008668Hg_chrom3_OP50_13323	OG0008668Hg_chrom3_PA3_16962	OG0008668Hg_chrom3_TN10_17034	OG0008668Hg_chrom3_TN20_14027	OG0008668Hg_chrom3_TN22_16585	OG0008668Hg_chrom3_TN7_16689	OG0008668Hg_chrom3_TN8_15918	OG0008668chr3X12_13436
OG0006582	OG0010706Hg_chrom3_TN10_17022	OG0022619Hg_chrom3_TN22_16593	OG0022619Hg_chrom3_TN8_15927	OG0030774Hg_chrom3_OP50_13330	OG0030774Hg_chrom3_TN20_14034	OG0030774Hg_chrom3_TN7_16697	OG0037720Hg_chrom3_MM26_21076	OG0037720Hg_chrom3_PA3_16968	chr3X12_13426
OG0006583	OG0004069Hg_chrom3_MM26_21082	OG0004069Hg_chrom3_OP50_13335	OG0004069Hg_chrom3_PA3_16977	OG0004069Hg_chrom3_TN10_17018	OG0004069Hg_chrom3_TN20_14039	OG0004069Hg_chrom3_TN22_16600	OG0004069Hg_chrom3_TN7_16705	OG0004069Hg_chrom3_TN8_15934	OG0004069chr3X12_13422
OG0006584	OG0006784Hg_chrom3_MM26_21085	OG0006784Hg_chrom3_PA3_16979	OG0006784Hg_chrom3_TN10_17011	OG0006784Hg_chrom3_TN22_16603	OG0006784Hg_chrom3_TN7_16709	OG0006784Hg_chrom3_TN8_15937	OG0006784chr3X12_13419	OG0039053Hg_chrom3_OP50_13341	OG0039053Hg_chrom3_TN20_14045
OG0006585	OG0001626Hg_chrom3_MM26_21089	OG0001626Hg_chrom3_OP50_13345	OG0001626Hg_chrom3_PA3_16984	OG0001626Hg_chrom3_TN10_17004	OG0001626Hg_chrom3_TN20_14047	OG0001626Hg_chrom3_TN22_16606	OG0001626Hg_chrom3_TN7_16712	OG0001626Hg_chrom3_TN8_15940	OG0001626chr3X12_13412
OG0006586	OG0002266Hg_chrom3_MM26_21092	OG0002266Hg_chrom3_OP50_13347	OG0002266Hg_chrom3_PA3_16989	OG0002266Hg_chrom3_TN20_14050	OG0002266Hg_chrom3_TN22_16610	OG0002266Hg_chrom3_TN7_16718	OG0002266Hg_chrom3_TN8_15944	OG0002266chr3X12_13409	OG0003436Hg_chrom3_TN10_17000
OG0006588	Hg_chrom3_OP50_13357	OG0008671Hg_chrom3_MM26_21111	OG0008671Hg_chrom3_PA3_17005	OG0008671Hg_chrom3_TN10_16978	OG0008671Hg_chrom3_TN20_14068	OG0008671Hg_chrom3_TN22_16624	OG0008671Hg_chrom3_TN7_16733	OG0008671Hg_chrom3_TN8_15961	OG0008671chr3X12_13349
OG0006589	OG0008672Hg_chrom3_MM26_21113	OG0008672Hg_chrom3_PA3_17007	OG0008672Hg_chrom3_TN10_16976	OG0008672Hg_chrom3_TN22_16626	OG0008672Hg_chrom3_TN7_16735	OG0008672Hg_chrom3_TN8_15963	OG0008672chr3X12_13346	OG0039056Hg_chrom3_OP50_13365	OG0039056Hg_chrom3_TN20_14069
OG0006590	OG0010707Hg_chrom3_MM26_21120	OG0010707Hg_chrom3_OP50_13372	OG0010707Hg_chrom3_PA3_17016	OG0010707Hg_chrom3_TN20_14076	OG0010707Hg_chrom3_TN22_16637	OG0010707Hg_chrom3_TN7_16742	OG0010707Hg_chrom3_TN8_15970	OG0010707chr3X12_13337	OG0040043Hg_chrom3_TN10_16969
OG0006591	Hg_chrom3_OP50_13375	OG0005978Hg_chrom3_MM26_21121	OG0005978Hg_chrom3_PA3_17013	OG0005978Hg_chrom3_TN10_16966	OG0005978Hg_chrom3_TN20_14078	OG0005978Hg_chrom3_TN22_16632	OG0005978Hg_chrom3_TN7_16744	OG0005978Hg_chrom3_TN8_15973	OG0005978chr3X12_13332
OG0006592	OG0017177Hg_chrom3_TN22_16639	OG0017178Hg_chrom3_MM26_21131	OG0017178Hg_chrom3_OP50_13380	OG0017178Hg_chrom3_PA3_17025	OG0017178Hg_chrom3_TN10_16956	OG0017178Hg_chrom3_TN20_14087	OG0017178Hg_chrom3_TN7_16753	OG0022620Hg_chrom3_TN8_15981	OG0030775chr3X12_13325
OG0006593	OG0004070Hg_chrom3_MM26_21135	OG0004070Hg_chrom3_OP50_13385	OG0004070Hg_chrom3_PA3_17030	OG0004070Hg_chrom3_TN10_16951	OG0004070Hg_chrom3_TN20_14093	OG0004070Hg_chrom3_TN22_16646	OG0004070Hg_chrom3_TN7_16756	OG0004070Hg_chrom3_TN8_15987	OG0004070chr3X12_13318
OG0006594	OG0004602Hg_chrom3_MM26_21146	OG0004602Hg_chrom3_OP50_13395	OG0004602Hg_chrom3_PA3_17038	OG0004602Hg_chrom3_TN10_16943	OG0004602Hg_chrom3_TN20_14099	OG0004602Hg_chrom3_TN22_16655	OG0004602Hg_chrom3_TN7_16766	OG0004602Hg_chrom3_TN8_15996	OG0004602chr3X12_13305
OG0006595	OG0017180Hg_chrom3_MM26_21148	OG0017180Hg_chrom3_OP50_13396	OG0017180Hg_chrom3_PA3_17039	OG0017180Hg_chrom3_TN10_16941	OG0017180Hg_chrom3_TN20_14101	OG0017180Hg_chrom3_TN22_16657	OG0017180Hg_chrom3_TN7_16768	OG0017180Hg_chrom3_TN8_15998	OG0017180chr3X12_13310
OG0006598	OG0000822Hg_chrom3_MM26_21175	OG0000822Hg_chrom3_OP50_13411	OG0000822Hg_chrom3_PA3_17058	OG0000822Hg_chrom3_TN10_16900	OG0000822Hg_chrom3_TN20_14320	OG0000822Hg_chrom3_TN22_16682	OG0000822Hg_chrom3_TN7_16785	OG0000822Hg_chrom3_TN8_16250	OG0000822chr3X12_13297
OG0006599	OG0010710Hg_chrom3_MM26_21183	OG0010710Hg_chrom3_OP50_13419	OG0010710Hg_chrom3_PA3_17069	OG0010710Hg_chrom3_TN10_16868	OG0010710Hg_chrom3_TN20_14311	OG0010710Hg_chrom3_TN22_16690	OG0010710Hg_chrom3_TN7_16795	OG0010710Hg_chrom3_TN8_16236	OG0010710chr3X12_13287
OG0006600	Hg_chrom3_TN10_16861	OG0013226Hg_chrom3_MM26_21187	OG0013226Hg_chrom3_OP50_13426	OG0013226Hg_chrom3_PA3_17074	OG0013226Hg_chrom3_TN20_14307	OG0013226Hg_chrom3_TN7_16802	OG0013226Hg_chrom3_TN8_16231	OG0042717Hg_chrom3_TN22_16696	OG0042717chr3X12_13283
OG0006601	OG0008673Hg_chrom3_MM26_21189	OG0008673Hg_chrom3_OP50_13427	OG0008673Hg_chrom3_PA3_17078	OG0008673Hg_chrom3_TN10_16856	OG0008673Hg_chrom3_TN20_14306	OG0008673Hg_chrom3_TN22_16701	OG0008673Hg_chrom3_TN7_16805	OG0008673Hg_chrom3_TN8_16228	OG0008673chr3X12_13281
OG0006602	OG0007732Hg_chrom3_MM26_21191	OG0007732Hg_chrom3_OP50_13428	OG0007732Hg_chrom3_PA3_17079	OG0007732Hg_chrom3_TN20_14303	OG0007732chr3X12_13276	OG0021876Hg_chrom3_TN10_16853	OG0021876Hg_chrom3_TN22_16703	OG0021876Hg_chrom3_TN8_16225	OG0028732Hg_chrom3_TN7_16807
OG0006604	OG0007734Hg_chrom3_MM26_21224	OG0007734Hg_chrom3_OP50_13439	OG0007734Hg_chrom3_PA3_17110	OG0007734Hg_chrom3_TN10_16822	OG0007734Hg_chrom3_TN20_14279	OG0007734Hg_chrom3_TN22_16729	OG0007734Hg_chrom3_TN7_16846	OG0007734Hg_chrom3_TN8_16199	OG0007734chr3X12_13240
OG0006605	OG0014906Hg_chrom3_MM26_21225	OG0014906Hg_chrom3_OP50_13443	OG0014906Hg_chrom3_PA3_17112	OG0014906Hg_chrom3_TN20_14277	OG0014906Hg_chrom3_TN22_16730	OG0014906Hg_chrom3_TN7_16852	OG0022624Hg_chrom3_TN10_16818	OG0022624Hg_chrom3_TN8_16197	OG0022624chr3X12_13237
OG0006606	OG0005979Hg_chrom3_MM26_21229	OG0005979Hg_chrom3_OP50_13445	OG0005979Hg_chrom3_PA3_17117	OG0005979Hg_chrom3_TN10_16814	OG0005979Hg_chrom3_TN20_14275	OG0005979Hg_chrom3_TN7_16853	OG0005979chr3X12_13233	OG0010712Hg_chrom3_TN22_16736	OG0010712Hg_chrom3_TN8_16193
OG0006607	Hg_chrom3_TN8_16185	OG0009650Hg_chrom3_OP50_13447	OG0009650Hg_chrom3_PA3_17120	OG0009650Hg_chrom3_TN20_14273	OG0009650chr3X12_13230	OG0014907Hg_chrom3_MM26_21233	OG0014907Hg_chrom3_TN7_16858	OG0027061Hg_chrom3_TN10_16808	OG0027061Hg_chrom3_TN22_16740
OG0006608	OG0002879Hg_chrom3_MM26_21239	OG0002879Hg_chrom3_OP50_13452	OG0002879Hg_chrom3_PA3_17124	OG0002879Hg_chrom3_TN10_16803	OG0002879Hg_chrom3_TN20_14266	OG0002879Hg_chrom3_TN22_16744	OG0002879Hg_chrom3_TN7_16865	OG0002879Hg_chrom3_TN8_16181	OG0002879chr3X12_13225
OG0006609	OG0014908Hg_chrom3_MM26_21241	OG0014908Hg_chrom3_OP50_13454	OG0014908Hg_chrom3_PA3_17127	OG0014908Hg_chrom3_TN10_16801	OG0014908Hg_chrom3_TN20_14264	OG0014908Hg_chrom3_TN22_16746	OG0014908Hg_chrom3_TN7_16866	OG0014908Hg_chrom3_TN8_16178	OG0014908chr3X12_13222
OG0006612	OG0014910Hg_chrom3_MM26_21278	OG0014910Hg_chrom3_OP50_13487	OG0014910Hg_chrom3_PA3_17163	OG0014910Hg_chrom3_TN10_16756	OG0014910Hg_chrom3_TN20_14230	OG0014910Hg_chrom3_TN8_16149	OG0014910chr3X12_13207	OG0042719Hg_chrom3_TN22_16775	OG0042719Hg_chrom3_TN7_16899
OG0006613	OG0006789Hg_chrom3_MM26_21281	OG0006789Hg_chrom3_OP50_13489	OG0006789Hg_chrom3_PA3_17166	OG0006789Hg_chrom3_TN10_16750	OG0006789Hg_chrom3_TN20_14229	OG0006789Hg_chrom3_TN22_16778	OG0006789Hg_chrom3_TN8_16143	OG0006789chr3X12_13202	OG0022628Hg_chrom3_TN7_16905
OG0006614	Hg_chrom3_OP50_13492	OG0005981Hg_chrom3_MM26_21287	OG0005981Hg_chrom3_PA3_17174	OG0005981Hg_chrom3_TN10_16742	OG0005981Hg_chrom3_TN20_14222	OG0005981Hg_chrom3_TN22_16787	OG0005981Hg_chrom3_TN7_16913	OG0005981Hg_chrom3_TN8_16136	OG0005981chr3X12_13196
OG0006615	OG0004604Hg_chrom3_MM26_21291	OG0004604Hg_chrom3_OP50_13495	OG0004604Hg_chrom3_PA3_17176	OG0004604Hg_chrom3_TN10_16740	OG0004604Hg_chrom3_TN20_14220	OG0004604Hg_chrom3_TN22_16791	OG0004604Hg_chrom3_TN7_16917	OG0004604Hg_chrom3_TN8_16134	OG0004604chr3X12_13194
OG0006616	OG0005982Hg_chrom3_MM26_21292	OG0005982Hg_chrom3_OP50_13496	OG0005982Hg_chrom3_PA3_17177	OG0005982Hg_chrom3_TN10_16737	OG0005982Hg_chrom3_TN20_14219	OG0005982Hg_chrom3_TN7_16919	OG0005982chr3X12_13192	OG0032165Hg_chrom3_TN22_16794	OG0032165Hg_chrom3_TN8_16132
OG0006617	OG0017185Hg_chrom3_OP50_13497	OG0017185Hg_chrom3_TN10_16735	OG0020018Hg_chrom3_MM26_21295	OG0020018Hg_chrom3_PA3_17180	OG0020018Hg_chrom3_TN20_14217	OG0020018Hg_chrom3_TN22_16798	OG0020018Hg_chrom3_TN7_16924	OG0020018Hg_chrom3_TN8_16129	OG0020018chr3X12_13190
OG0006618	OG0004606Hg_chrom3_OP50_13505	OG0004606Hg_chrom3_TN20_14210	OG0020019Hg_chrom3_MM26_21301	OG0020019Hg_chrom3_PA3_17188	OG0020019Hg_chrom3_TN10_16725	OG0020019Hg_chrom3_TN22_16805	OG0020019Hg_chrom3_TN7_16929	OG0020019Hg_chrom3_TN8_16122	OG0020019chr3X12_13180
OG0006619	OG0003212Hg_chrom3_MM26_21311	OG0003212Hg_chrom3_OP50_13507	OG0003212Hg_chrom3_PA3_17191	OG0003212Hg_chrom3_TN10_16718	OG0003212Hg_chrom3_TN20_14206	OG0003212Hg_chrom3_TN22_16809	OG0003212Hg_chrom3_TN7_16933	OG0003212Hg_chrom3_TN8_16115	OG0003212chr3X12_13173
OG0006620	OG0014912Hg_chrom3_OP50_13513	OG0014912Hg_chrom3_PA3_17200	OG0014912Hg_chrom3_TN20_14201	OG0024784Hg_chrom3_MM26_21320	OG0024784Hg_chrom3_TN10_16712	OG0024784Hg_chrom3_TN22_16818	OG0024784Hg_chrom3_TN7_16945	OG0024784Hg_chrom3_TN8_16105	OG0024784chr3X12_13165
OG0006621	OG0000823Hg_chrom3_MM26_21333	OG0000823Hg_chrom3_OP50_13526	OG0000823Hg_chrom3_PA3_17211	OG0000823Hg_chrom3_TN10_16696	OG0000823Hg_chrom3_TN20_14189	OG0000823Hg_chrom3_TN22_16830	OG0000823Hg_chrom3_TN7_16959	OG0000823Hg_chrom3_TN8_16095	OG0000823chr3X12_13153
OG0006622	OG0017186Hg_chrom3_MM26_21337	OG0017186Hg_chrom3_OP50_13530	OG0017186Hg_chrom3_PA3_17215	OG0017186Hg_chrom3_TN10_16692	OG0017186Hg_chrom3_TN20_14194	OG0017186Hg_chrom3_TN22_16832	OG0017186Hg_chrom3_TN7_16963	OG0017186Hg_chrom3_TN8_16093	OG0017186chr3X12_13151
OG0006623	Hg_chrom3_TN8_16087	OG0017189Hg_chrom3_MM26_21344	OG0017189Hg_chrom3_PA3_17223	OG0017189Hg_chrom3_TN10_16685	OG0017189Hg_chrom3_TN20_14182	OG0017189chr3X12_13144	OG0030777Hg_chrom3_OP50_13535	OG0033063Hg_chrom3_TN22_16837	OG0033063Hg_chrom3_TN7_16970
OG0006627	OG0003597Hg_chrom3_OP50_13618	OG0003597Hg_chrom3_PA3_17333	OG0003597Hg_chrom3_TN10_16596	OG0003597Hg_chrom3_TN20_14352	OG0003597Hg_chrom3_TN22_16936	OG0003597Hg_chrom3_TN7_17080	OG0003597Hg_chrom3_TN8_16285	OG0033065Hg_chrom3_MM26_21381	OG0033065chr3X12_13012
OG0006628	OG0003598Hg_chrom3_MM26_21383	OG0003598Hg_chrom3_OP50_13617	OG0003598Hg_chrom3_PA3_17332	OG0003598Hg_chrom3_TN10_16600	OG0003598Hg_chrom3_TN20_14351	OG0003598Hg_chrom3_TN22_16932	OG0003598Hg_chrom3_TN7_17077	OG0003598Hg_chrom3_TN8_16282	OG0003598chr3X12_13015
OG0006629	OG0017191Hg_chrom3_MM26_21437	OG0017191Hg_chrom3_OP50_13583	OG0017191Hg_chrom3_PA3_17283	OG0017191Hg_chrom3_TN10_16631	OG0017191Hg_chrom3_TN20_14131	OG0017191Hg_chrom3_TN22_16899	OG0017191Hg_chrom3_TN7_17035	OG0017191Hg_chrom3_TN8_16025	OG0017191chr3X12_13054
OG0006632	Hg_chrom3_TN10_16573	OG0009654Hg_chrom3_MM26_21503	OG0009654Hg_chrom3_OP50_13641	OG0009654Hg_chrom3_PA3_17363	OG0009654Hg_chrom3_TN20_14385	OG0009654Hg_chrom3_TN22_16991	OG0009654Hg_chrom3_TN7_17114	OG0009654Hg_chrom3_TN8_16314	OG0009654chr3X12_12982
OG0006633	OG0014918Hg_chrom3_MM26_21510	OG0014918Hg_chrom3_OP50_13643	OG0014918Hg_chrom3_PA3_17372	OG0014918Hg_chrom3_TN10_16561	OG0014918Hg_chrom3_TN20_14393	OG0014918Hg_chrom3_TN22_16998	OG0014918Hg_chrom3_TN7_17122	OG0014918Hg_chrom3_TN8_16321	OG0014918chr3X12_12974
OG0006634	OG0014919Hg_chrom3_MM26_21514	OG0014919Hg_chrom3_OP50_13645	OG0014919Hg_chrom3_PA3_17376	OG0014919Hg_chrom3_TN10_16557	OG0014919Hg_chrom3_TN20_14395	OG0014919Hg_chrom3_TN22_17003	OG0014919Hg_chrom3_TN7_17127	OG0014919Hg_chrom3_TN8_16325	OG0014919chr3X12_12970
OG0006635	OG0005984Hg_chrom3_MM26_21517	OG0005984Hg_chrom3_OP50_13647	OG0005984Hg_chrom3_PA3_17378	OG0005984Hg_chrom3_TN10_16556	OG0005984Hg_chrom3_TN20_14396	OG0005984Hg_chrom3_TN22_17007	OG0005984Hg_chrom3_TN8_16330	OG0005984chr3X12_12968	OG0035480Hg_chrom3_TN7_17131
OG0006636	OG0011849Hg_chrom3_MM26_21521	OG0011849Hg_chrom3_PA3_17380	OG0011849Hg_chrom3_TN10_16550	OG0011849Hg_chrom3_TN22_17010	OG0011849Hg_chrom3_TN7_17133	OG0011849Hg_chrom3_TN8_16332	OG0011849chr3X12_12966	OG0017193Hg_chrom3_OP50_13650	OG0017193Hg_chrom3_TN20_14397
OG0006637	OG0017194Hg_chrom3_MM26_21523	OG0017194Hg_chrom3_OP50_13651	OG0017194Hg_chrom3_PA3_17382	OG0017194Hg_chrom3_TN10_16548	OG0017194Hg_chrom3_TN20_14398	OG0017194chr3X12_12964	OG0036291Hg_chrom3_TN22_17011	OG0036291Hg_chrom3_TN7_17135	OG0036291Hg_chrom3_TN8_16334
OG0006638	OG0007737Hg_chrom3_MM26_21526	OG0007737Hg_chrom3_OP50_13652	OG0007737Hg_chrom3_PA3_17385	OG0007737Hg_chrom3_TN10_16545	OG0007737chr3X12_12961	OG0022638Hg_chrom3_TN20_14400	OG0022638Hg_chrom3_TN22_17013	OG0022638Hg_chrom3_TN7_17137	OG0022638Hg_chrom3_TN8_16336
OG0006639	OG0014920Hg_chrom3_MM26_21531	OG0014920Hg_chrom3_TN10_16541	OG0014920Hg_chrom3_TN22_17020	OG0014920Hg_chrom3_TN8_16342	OG0014920chr3X12_12955	OG0022639Hg_chrom3_PA3_17390	OG0034206Hg_chrom3_OP50_13657	OG0034206Hg_chrom3_TN20_14404	OG0034206Hg_chrom3_TN7_17142
OG0006640	OG0013234Hg_chrom3_MM26_21533	OG0013234Hg_chrom3_OP50_13661	OG0013234Hg_chrom3_PA3_17392	OG0013234Hg_chrom3_TN10_16539	OG0013234Hg_chrom3_TN20_14407	OG0013234Hg_chrom3_TN22_17022	OG0013234Hg_chrom3_TN7_17146	OG0013234Hg_chrom3_TN8_16344	OG0013234chr3X12_12953
OG0006641	OG0011850Hg_chrom3_MM26_21535	OG0011850Hg_chrom3_OP50_13663	OG0011850Hg_chrom3_PA3_17393	OG0011850Hg_chrom3_TN10_16537	OG0011850Hg_chrom3_TN20_14408	OG0011850Hg_chrom3_TN22_17026	OG0011850Hg_chrom3_TN7_17149	OG0011850Hg_chrom3_TN8_16347	OG0011850chr3X12_12948
OG0006642	OG0014921Hg_chrom3_MM26_21537	OG0014921Hg_chrom3_OP50_13664	OG0014921Hg_chrom3_PA3_17394	OG0014921Hg_chrom3_TN10_16536	OG0014921Hg_chrom3_TN20_14410	OG0014921Hg_chrom3_TN22_17029	OG0014921Hg_chrom3_TN7_17151	OG0014921Hg_chrom3_TN8_16349	OG0014921chr3X12_12947
OG0006644	OG0013237Hg_chrom3_MM26_21586	OG0013237Hg_chrom3_OP50_13692	OG0013237Hg_chrom3_PA3_17424	OG0013237Hg_chrom3_TN10_16492	OG0013237Hg_chrom3_TN20_14439	OG0013237Hg_chrom3_TN22_17059	OG0013237Hg_chrom3_TN7_17191	OG0013237Hg_chrom3_TN8_16383	OG0013237chr3X12_12888
OG0006645	OG0007738Hg_chrom3_MM26_21596	OG0007738Hg_chrom3_OP50_13696	OG0007738Hg_chrom3_PA3_17430	OG0007738Hg_chrom3_TN10_16487	OG0007738Hg_chrom3_TN20_14445	OG0007738Hg_chrom3_TN22_17068	OG0007738Hg_chrom3_TN7_17200	OG0007738Hg_chrom3_TN8_16390	OG0007738chr3X12_12876
OG0006646	OG0005250Hg_chrom3_MM26_21599	OG0005250Hg_chrom3_OP50_13699	OG0005250Hg_chrom3_PA3_17434	OG0005250Hg_chrom3_TN10_16485	OG0005250Hg_chrom3_TN20_14446	OG0005250chr3X12_12875	OG0026456Hg_chrom3_TN22_17072	OG0026456Hg_chrom3_TN7_17205	OG0026456Hg_chrom3_TN8_16395
OG0006647	OG0011855Hg_chrom3_MM26_21603	OG0011855Hg_chrom3_OP50_13701	OG0011855Hg_chrom3_TN10_16480	OG0011855Hg_chrom3_TN20_14448	OG0011855Hg_chrom3_TN22_17074	OG0011855Hg_chrom3_TN7_17207	OG0011855Hg_chrom3_TN8_16397	OG0011855chr3X12_12867	OG0014925Hg_chrom3_PA3_17438
OG0006648	OG0017197Hg_chrom3_MM26_21607	OG0017197Hg_chrom3_OP50_13709	OG0017197Hg_chrom3_PA3_17439	OG0017197Hg_chrom3_TN10_16483	OG0017197Hg_chrom3_TN20_14452	OG0017197Hg_chrom3_TN22_17078	OG0017197Hg_chrom3_TN7_17212	OG0017197Hg_chrom3_TN8_16402	OG0017197chr3X12_12869
OG0006650	OG0014929Hg_chrom3_MM26_21703	OG0014929Hg_chrom3_OP50_13792	OG0014929Hg_chrom3_PA3_17512	OG0014929Hg_chrom3_TN10_16382	OG0014929Hg_chrom3_TN20_14507	OG0014929Hg_chrom3_TN22_17155	OG0014929Hg_chrom3_TN7_17283	OG0014929Hg_chrom3_TN8_16472	OG0014929chr3X12_12737
OG0006651	OG0006797Hg_chrom3_MM26_21704	OG0006797Hg_chrom3_PA3_17513	OG0006797Hg_chrom3_TN10_16377	OG0006797Hg_chrom3_TN22_17156	OG0006797Hg_chrom3_TN7_17286	OG0006797Hg_chrom3_TN8_16474	OG0017201Hg_chrom3_OP50_13794	OG0017201Hg_chrom3_TN20_14511	OG0017201chr3X12_12733
OG0006652	OG0001630Hg_chrom3_OP50_13796	OG0001630Hg_chrom3_PA3_17522	OG0001630Hg_chrom3_TN10_16371	OG0001630Hg_chrom3_TN20_14513	OG0001630Hg_chrom3_TN7_17294	OG0001630chr3X12_12730	OG0024794Hg_chrom3_MM26_21713	OG0024794Hg_chrom3_TN22_17165	OG0024794Hg_chrom3_TN8_16482
OG0006653	OG0010722Hg_chrom3_OP50_13800	OG0010722Hg_chrom3_PA3_17524	OG0010722Hg_chrom3_TN10_16370	OG0010722Hg_chrom3_TN22_17168	OG0010722chr3X12_12726	OG0023877Hg_chrom3_TN7_17298	OG0023877Hg_chrom3_TN8_16489	OG0029630Hg_chrom3_MM26_21718	OG0029630Hg_chrom3_TN20_14515
OG0006654	OG0017202Hg_chrom3_MM26_21728	OG0017202Hg_chrom3_OP50_13813	OG0017202Hg_chrom3_PA3_17535	OG0017202Hg_chrom3_TN10_16358	OG0017202Hg_chrom3_TN20_14528	OG0017202Hg_chrom3_TN22_17179	OG0017202Hg_chrom3_TN7_17313	OG0017202Hg_chrom3_TN8_16503	OG0017202chr3X12_12702
OG0006655	OG0014932Hg_chrom3_MM26_21737	OG0014932Hg_chrom3_OP50_13825	OG0014932Hg_chrom3_PA3_17543	OG0014932Hg_chrom3_TN10_16349	OG0014932Hg_chrom3_TN20_14537	OG0014932Hg_chrom3_TN22_17189	OG0014932Hg_chrom3_TN7_17323	OG0014932Hg_chrom3_TN8_16512	OG0014932chr3X12_12695
OG0006656	OG0010723Hg_chrom3_MM26_21755	OG0010723Hg_chrom3_OP50_13846	OG0010723Hg_chrom3_PA3_17568	OG0010723Hg_chrom3_TN10_16328	OG0010723Hg_chrom3_TN20_14551	OG0010723Hg_chrom3_TN8_16533	OG0010723chr3X12_12661	OG0017203Hg_chrom3_TN22_17211	OG0017203Hg_chrom3_TN7_17346
OG0006657	OG0008679Hg_chrom3_MM26_21759	OG0008679Hg_chrom3_OP50_13850	OG0008679Hg_chrom3_TN10_16325	OG0008679Hg_chrom3_TN20_14555	OG0008679Hg_chrom3_TN22_17216	OG0008679Hg_chrom3_TN7_17351	OG0008679Hg_chrom3_TN8_16538	OG0008679chr3X12_12656	OG0033075Hg_chrom3_PA3_17573
OG0006658	OG0003213Hg_chrom3_MM26_21764	OG0003213Hg_chrom3_OP50_13851	OG0003213Hg_chrom3_PA3_17577	OG0003213Hg_chrom3_TN10_16318	OG0003213Hg_chrom3_TN20_14558	OG0003213Hg_chrom3_TN22_17218	OG0003213Hg_chrom3_TN7_17353	OG0003213Hg_chrom3_TN8_16543	OG0003213chr3X12_12652
OG0006659	Hg_chrom3_OP50_13860	OG0005252Hg_chrom3_PA3_17584	OG0005252Hg_chrom3_TN10_16314	OG0005252Hg_chrom3_TN20_14563	OG0005252chr3X12_12647	OG0022643Hg_chrom3_MM26_21771	OG0022643Hg_chrom3_TN22_17226	OG0022643Hg_chrom3_TN7_17365	OG0022643Hg_chrom3_TN8_16554
OG0006660	OG0009659Hg_chrom3_MM26_21777	OG0009659Hg_chrom3_OP50_13868	OG0009659Hg_chrom3_PA3_17595	OG0009659Hg_chrom3_TN10_16310	OG0009659Hg_chrom3_TN20_14572	OG0009659Hg_chrom3_TN22_17232	OG0009659Hg_chrom3_TN7_17370	OG0009659Hg_chrom3_TN8_16564	OG0009659chr3X12_12631
OG0006661	OG0010727Hg_chrom3_MM26_21806	OG0010727Hg_chrom3_OP50_13895	OG0010727Hg_chrom3_PA3_17626	OG0010727Hg_chrom3_TN10_16265	OG0010727Hg_chrom3_TN20_14598	OG0010727Hg_chrom3_TN22_17296	OG0010727Hg_chrom3_TN7_17393	OG0010727Hg_chrom3_TN8_16601	OG0010727chr3X12_12594
OG0006662	OG0002884Hg_chrom3_MM26_21808	OG0002884Hg_chrom3_OP50_13898	OG0002884Hg_chrom3_PA3_17628	OG0002884Hg_chrom3_TN10_16263	OG0002884Hg_chrom3_TN20_14600	OG0002884Hg_chrom3_TN22_17298	OG0002884Hg_chrom3_TN7_17394	OG0002884Hg_chrom3_TN8_16603	OG0002884chr3X12_12592
OG0006663	OG0003602Hg_chrom3_MM26_21812	OG0003602Hg_chrom3_OP50_13901	OG0003602Hg_chrom3_PA3_17631	OG0003602Hg_chrom3_TN10_16257	OG0003602Hg_chrom3_TN20_14603	OG0003602Hg_chrom3_TN22_17302	OG0003602Hg_chrom3_TN7_17398	OG0003602Hg_chrom3_TN8_16605	OG0003602chr3X12_12588
OG0006664	OG0007744Hg_chrom3_MM26_21814	OG0007744Hg_chrom3_OP50_13904	OG0007744Hg_chrom3_PA3_17633	OG0007744Hg_chrom3_TN10_16252	OG0007744Hg_chrom3_TN20_14605	OG0007744Hg_chrom3_TN22_17304	OG0007744Hg_chrom3_TN7_17399	OG0007744Hg_chrom3_TN8_16607	OG0007744chr3X12_12586
OG0006665	OG0008680Hg_chrom3_MM26_21819	OG0008680Hg_chrom3_OP50_13905	OG0008680Hg_chrom3_PA3_17636	OG0008680Hg_chrom3_TN10_16250	OG0008680Hg_chrom3_TN20_14606	OG0008680Hg_chrom3_TN22_17308	OG0008680Hg_chrom3_TN7_17403	OG0008680Hg_chrom3_TN8_16610	OG0008680chr3X12_12585
OG0006666	OG0009660Hg_chrom3_MM26_21821	OG0009660Hg_chrom3_OP50_13907	OG0009660Hg_chrom3_PA3_17638	OG0009660Hg_chrom3_TN10_16249	OG0009660Hg_chrom3_TN20_14608	OG0009660Hg_chrom3_TN22_17309	OG0009660Hg_chrom3_TN7_17404	OG0009660Hg_chrom3_TN8_16611	OG0009660chr3X12_12584
OG0006667	OG0017205Hg_chrom3_MM26_21891	OG0017205Hg_chrom3_OP50_13957	OG0017205Hg_chrom3_PA3_17688	OG0017205Hg_chrom3_TN10_16200	OG0017205Hg_chrom3_TN20_14656	OG0017205Hg_chrom3_TN22_17343	OG0017205Hg_chrom3_TN7_17453	OG0017205Hg_chrom3_TN8_16657	OG0017205chr3X12_12541
OG0006669	OG0003216Hg_chrom3_MM26_21955	OG0003216Hg_chrom3_OP50_14011	OG0003216Hg_chrom3_PA3_17732	OG0003216Hg_chrom3_TN10_16154	OG0003216Hg_chrom3_TN20_14709	OG0003216Hg_chrom3_TN22_17419	OG0003216Hg_chrom3_TN7_17501	OG0003216Hg_chrom3_TN8_16707	OG0003216chr3X12_12476
OG0006671	OG0014940Hg_chrom3_PA3_17790	OG0014940Hg_chrom3_TN10_16087	OG0014940Hg_chrom3_TN8_16776	OG0017207Hg_chrom3_MM26_22027	OG0017207Hg_chrom3_OP50_14053	OG0017207Hg_chrom3_TN20_14755	OG0017207Hg_chrom3_TN22_17489	OG0017207Hg_chrom3_TN7_17568	OG0017207chr3X12_12338
OG0006672	OG0009666Hg_chrom3_MM26_22035	OG0009666Hg_chrom3_OP50_14058	OG0009666Hg_chrom3_PA3_17793	OG0009666Hg_chrom3_TN10_16082	OG0009666Hg_chrom3_TN20_14757	OG0009666Hg_chrom3_TN22_17491	OG0009666Hg_chrom3_TN7_17571	OG0009666Hg_chrom3_TN8_16779	OG0009666chr3X12_12335
OG0006673	OG0013243Hg_chrom3_MM26_22045	OG0013243Hg_chrom3_OP50_14069	OG0013243Hg_chrom3_PA3_17803	OG0013243Hg_chrom3_TN10_16072	OG0013243Hg_chrom3_TN20_14770	OG0013243Hg_chrom3_TN22_17502	OG0013243Hg_chrom3_TN7_17579	OG0013243Hg_chrom3_TN8_16788	OG0013243chr3X12_12324
OG0006674	Hg_chrom3_PA3_17906	OG0001426Hg_chrom3_OP50_14163	OG0001426Hg_chrom3_TN10_15950	OG0001426Hg_chrom3_TN22_17596	OG0001426Hg_chrom3_TN7_17697	OG0001426Hg_chrom3_TN8_16884	OG0024800Hg_chrom3_MM26_22079	OG0024800Hg_chrom3_TN20_14886	chr3X12_12207
OG0006675	OG0004614Hg_chrom3_MM26_22086	OG0004614Hg_chrom3_OP50_14167	OG0004614Hg_chrom3_PA3_17911	OG0004614Hg_chrom3_TN10_15947	OG0004614Hg_chrom3_TN20_14889	OG0004614Hg_chrom3_TN22_17599	OG0004614Hg_chrom3_TN7_17703	OG0004614Hg_chrom3_TN8_16890	OG0004614chr3X12_12201
OG0006676	OG0017208Hg_chrom3_MM26_22114	OG0017208Hg_chrom3_OP50_14086	OG0017208Hg_chrom3_PA3_17831	OG0017208Hg_chrom3_TN10_16038	OG0017208Hg_chrom3_TN20_14802	OG0017208Hg_chrom3_TN22_17524	OG0017208Hg_chrom3_TN7_17608	OG0017208Hg_chrom3_TN8_16820	OG0017208chr3X12_12288
OG0006677	OG0017209Hg_chrom3_OP50_14087	OG0017209Hg_chrom3_TN20_14803	OG0017209Hg_chrom3_TN22_17525	OG0017209Hg_chrom3_TN7_17609	OG0025826Hg_chrom3_TN10_16035	OG0025826chr3X12_12285	OG0033091Hg_chrom3_MM26_22116	OG0033091Hg_chrom3_PA3_17833	OG0033091Hg_chrom3_TN8_16822
OG0006678	OG0014949Hg_chrom3_MM26_22204	OG0014949Hg_chrom3_OP50_14305	OG0014949Hg_chrom3_PA3_17962	OG0014949Hg_chrom3_TN10_15839	OG0014949Hg_chrom3_TN20_14983	OG0014949Hg_chrom3_TN22_17714	OG0014949Hg_chrom3_TN7_17786	OG0014949Hg_chrom3_TN8_17015	OG0014949chr3X12_12082
OG0006679	OG0017213Hg_chrom3_OP50_14302	OG0017213Hg_chrom3_TN10_15840	OG0017213Hg_chrom3_TN20_14981	OG0017213chr3X12_12083	OG0022652Hg_chrom3_MM26_22206	OG0022652Hg_chrom3_PA3_17961	OG0036298Hg_chrom3_TN22_17712	OG0036298Hg_chrom3_TN7_17783	OG0036298Hg_chrom3_TN8_17013
OG0006681	OG0009673Hg_chrom3_MM26_22293	OG0009673Hg_chrom3_OP50_14345	OG0009673Hg_chrom3_TN10_15793	OG0009673Hg_chrom3_TN20_15022	OG0009673Hg_chrom3_TN22_17744	OG0009673Hg_chrom3_TN7_17827	OG0009673Hg_chrom3_TN8_17045	OG0009673Hg_chrom6_PA3_34903	OG0009673chr3X12_12041
OG0006684	OG0014952Hg_chrom3_MM26_22323	OG0014952Hg_chrom3_OP50_14385	OG0014952Hg_chrom3_PA3_18026	OG0014952Hg_chrom3_TN10_15761	OG0014952Hg_chrom3_TN20_15038	OG0014952Hg_chrom3_TN22_17772	OG0014952Hg_chrom3_TN7_17855	OG0014952Hg_chrom3_TN8_17072	OG0014952chr3X12_12005
OG0006685	OG0005990Hg_chrom3_MM26_22327	OG0005990Hg_chrom3_OP50_14389	OG0005990Hg_chrom3_TN10_15756	OG0005990Hg_chrom3_TN20_15039	OG0005990Hg_chrom3_TN22_17777	OG0005990Hg_chrom3_TN7_17860	OG0005990Hg_chrom3_TN8_17078	OG0005990chr3X12_12002	OG0019057Hg_chrom3_PA3_18028
OG0006686	Hg_chrom3_TN20_15074	OG0000250Hg_chrom3_MM26_22362	OG0000250Hg_chrom3_OP50_14420	OG0000250Hg_chrom3_PA3_18063	OG0000250Hg_chrom3_TN10_15710	OG0000250Hg_chrom3_TN22_17815	OG0000250Hg_chrom3_TN7_17897	OG0000250Hg_chrom3_TN8_17112	OG0000250chr3X12_11970
OG0006687	OG0002887Hg_chrom3_MM26_22371	OG0002887Hg_chrom3_OP50_14428	OG0002887Hg_chrom3_PA3_18068	OG0002887Hg_chrom3_TN10_15706	OG0002887Hg_chrom3_TN20_15079	OG0002887Hg_chrom3_TN22_17824	OG0002887Hg_chrom3_TN7_17902	OG0002887Hg_chrom3_TN8_17118	OG0002887chr3X12_11961
OG0006688	OG0017219Hg_chrom3_MM26_22374	OG0017219Hg_chrom3_OP50_14429	OG0017219Hg_chrom3_PA3_18071	OG0017219Hg_chrom3_TN10_15704	OG0017219Hg_chrom3_TN20_15083	OG0017219Hg_chrom3_TN22_17825	OG0017219Hg_chrom3_TN7_17903	OG0017219Hg_chrom3_TN8_17119	OG0017219chr3X12_11960
OG0006689	OG0014953Hg_chrom3_MM26_22395	OG0014953Hg_chrom3_OP50_14446	OG0014953Hg_chrom3_PA3_18099	OG0014953Hg_chrom3_TN10_15600	OG0014953Hg_chrom3_TN20_15095	OG0014953Hg_chrom3_TN22_17849	OG0014953Hg_chrom3_TN7_17923	OG0014953Hg_chrom3_TN8_17149	OG0014953chr3X12_11926
OG0006692	Hg_chrom3_TN7_17986	OG0001632Hg_chrom3_MM26_22530	OG0001632Hg_chrom3_OP50_14493	OG0001632Hg_chrom3_PA3_18231	OG0001632Hg_chrom3_TN10_15476	OG0001632Hg_chrom3_TN20_15172	OG0001632Hg_chrom3_TN22_17963	OG0001632Hg_chrom3_TN8_17259	OG0001632chr3X12_11826
OG0006693	Hg_chrom3_TN7_17994	OG0009676Hg_chrom3_MM26_22533	OG0009676Hg_chrom3_OP50_14489	OG0009676Hg_chrom3_PA3_18229	OG0009676Hg_chrom3_TN10_15473	OG0009676Hg_chrom3_TN20_15170	OG0009676Hg_chrom3_TN22_17959	OG0009676Hg_chrom3_TN8_17256	OG0009676chr3X12_11829
OG0006697	OG0000194Hg_chrom3_MM26_22589	OG0000194Hg_chrom3_OP50_14554	OG0000194Hg_chrom3_PA3_18286	OG0000194Hg_chrom3_TN10_15381	OG0000194Hg_chrom3_TN20_15214	OG0000194Hg_chrom3_TN22_18048	OG0000194Hg_chrom3_TN7_18117	OG0000194Hg_chrom3_TN8_17315	OG0000194chr3X12_11743
OG0006698	OG0003606Hg_chrom3_MM26_22622	OG0003606Hg_chrom3_OP50_14585	OG0003606Hg_chrom3_PA3_18319	OG0003606Hg_chrom3_TN10_15330	OG0003606Hg_chrom3_TN20_15241	OG0003606Hg_chrom3_TN22_18077	OG0003606Hg_chrom3_TN7_18158	OG0003606Hg_chrom3_TN8_17346	OG0003606chr3X12_11623
OG0006706	OG0006813Hg_chrom3_MM26_23009	OG0006813Hg_chrom3_OP50_14899	OG0006813Hg_chrom3_PA3_18724	OG0006813Hg_chrom3_TN10_14979	OG0006813Hg_chrom3_TN20_15385	OG0006813Hg_chrom3_TN22_18468	OG0006813Hg_chrom3_TN7_18512	OG0006813Hg_chrom3_TN8_17661	OG0006813chr3X12_11192
OG0006707	OG0007758Hg_chrom3_MM26_23011	OG0007758Hg_chrom3_OP50_14901	OG0007758Hg_chrom3_PA3_18727	OG0007758Hg_chrom3_TN10_14975	OG0007758Hg_chrom3_TN20_15382	OG0007758Hg_chrom3_TN22_18471	OG0007758Hg_chrom3_TN7_18515	OG0007758Hg_chrom3_TN8_17663	OG0007758chr3X12_11190
OG0006708	OG0000661Hg_chrom3_MM26_23013	OG0000661Hg_chrom3_OP50_14907	OG0000661Hg_chrom3_PA3_18731	OG0000661Hg_chrom3_TN10_14969	OG0000661Hg_chrom3_TN20_15376	OG0000661Hg_chrom3_TN22_18474	OG0000661Hg_chrom3_TN7_18518	OG0000661Hg_chrom3_TN8_17665	OG0000661chr3X12_11186
OG0006709	OG0002570Hg_chrom3_MM26_23015	OG0002570Hg_chrom3_OP50_14910	OG0002570Hg_chrom3_PA3_18733	OG0002570Hg_chrom3_TN10_14966	OG0002570Hg_chrom3_TN20_15373	OG0002570Hg_chrom3_TN22_18481	OG0002570Hg_chrom3_TN7_18522	OG0002570Hg_chrom3_TN8_17670	OG0002570chr3X12_11182
OG0006711	Hg_chrom3_TN10_14958	OG0017237Hg_chrom3_OP50_14917	OG0017237Hg_chrom3_TN7_18529	OG0020061Hg_chrom3_MM26_23020	OG0020061Hg_chrom3_PA3_18741	OG0020061Hg_chrom3_TN20_15366	OG0020061Hg_chrom3_TN22_18488	OG0020061Hg_chrom3_TN8_17675	OG0020061chr3X12_11180
OG0006712	OG0017238Hg_chrom3_MM26_23024	OG0017238Hg_chrom3_OP50_14918	OG0017238Hg_chrom3_PA3_18744	OG0017238Hg_chrom3_TN10_14948	OG0017238Hg_chrom3_TN20_15364	OG0017238Hg_chrom3_TN22_18491	OG0017238Hg_chrom3_TN7_18532	OG0017238Hg_chrom3_TN8_17678	OG0017238chr3X12_11177
OG0006721	OG0003612Hg_chrom3_TN10_14684	OG0003612Hg_chrom3_TN22_18745	OG0003612Hg_chrom3_TN7_18828	OG0020072Hg_chrom3_MM26_23341	OG0020072Hg_chrom3_OP50_9676	OG0020072Hg_chrom3_PA3_19197	OG0020072Hg_chrom3_TN20_15769	OG0020072Hg_chrom3_TN8_17852	OG0020072chr3X12_11033
OG0006722	Hg_chrom3_TN7_18866	OG0008703Hg_chrom3_MM26_23384	OG0008703Hg_chrom3_OP50_9705	OG0008703Hg_chrom3_PA3_19164	OG0008703Hg_chrom3_TN10_14607	OG0008703Hg_chrom3_TN20_15799	OG0008703Hg_chrom3_TN22_18787	OG0008703Hg_chrom3_TN8_17906	OG0008703chr3X12_10992
OG0006724	OG0013267Hg_chrom3_MM26_23428	OG0013267Hg_chrom3_OP50_9741	OG0013267Hg_chrom3_PA3_19116	OG0013267Hg_chrom3_TN10_14537	OG0013267Hg_chrom3_TN20_15835	OG0013267Hg_chrom3_TN22_18841	OG0013267Hg_chrom3_TN7_18919	OG0013267Hg_chrom3_TN8_17955	OG0013267chr3X12_10953
OG0006726	OG0008706Hg_chrom3_OP50_9767	OG0008706Hg_chrom3_TN20_15895	OG0008706Hg_chrom3_TN8_18013	OG0008706chr3X12_10871	OG0024829Hg_chrom3_MM26_23482	OG0024829Hg_chrom3_PA3_19067	OG0024829Hg_chrom3_TN10_14454	OG0024829Hg_chrom3_TN22_18919	OG0024829Hg_chrom3_TN7_18972
OG0006727	OG0014980Hg_chrom3_MM26_23490	OG0014980Hg_chrom3_OP50_9774	OG0014980Hg_chrom3_PA3_19062	OG0014980Hg_chrom3_TN10_14465	OG0014980Hg_chrom3_TN20_15899	OG0014980Hg_chrom3_TN8_18022	OG0014980chr3X12_10865	OG0020076Hg_chrom3_TN22_18925	OG0020076Hg_chrom3_TN7_18978
OG0006729	OG0014981Hg_chrom3_MM26_23501	OG0014981Hg_chrom3_OP50_9780	OG0014981Hg_chrom3_PA3_19053	OG0014981Hg_chrom3_TN10_14446	OG0014981Hg_chrom3_TN20_15904	OG0014981Hg_chrom3_TN22_18933	OG0014981Hg_chrom3_TN7_18991	OG0014981Hg_chrom3_TN8_18033	OG0014981chr3X12_10856
OG0006730	Hg_chrom3_TN8_18038	OG0014982Hg_chrom3_MM26_23510	OG0014982Hg_chrom3_OP50_9791	OG0014982Hg_chrom3_PA3_19045	OG0014982Hg_chrom3_TN10_14439	OG0014982Hg_chrom3_TN20_15910	OG0014982Hg_chrom3_TN22_18940	OG0014982Hg_chrom3_TN7_19002	OG0014982chr3X12_10849
OG0006731	OG0010751Hg_chrom3_MM26_23511	OG0010751Hg_chrom3_OP50_9792	OG0010751Hg_chrom3_PA3_19043	OG0010751Hg_chrom3_TN10_14437	OG0010751Hg_chrom3_TN20_15911	OG0010751Hg_chrom3_TN22_18943	OG0010751Hg_chrom3_TN7_19004	OG0010751chr3X12_10847	OG0020078Hg_chrom3_TN8_18041
OG0006732	Hg_chrom3_TN7_19028	OG0017252Hg_chrom3_MM26_23537	OG0017252Hg_chrom3_OP50_9803	OG0017252Hg_chrom3_PA3_19012	OG0017252Hg_chrom3_TN10_14410	OG0017252Hg_chrom3_TN20_15923	OG0017252Hg_chrom3_TN22_18961	OG0017252Hg_chrom3_TN8_18058	OG0017252chr3X12_10834
OG0006733	OG0006823Hg_chrom3_MM26_23544	OG0006823Hg_chrom3_OP50_9825	OG0006823Hg_chrom3_PA3_18995	OG0006823Hg_chrom3_TN10_14393	OG0006823Hg_chrom3_TN20_15939	OG0006823Hg_chrom3_TN22_18981	OG0006823Hg_chrom3_TN7_19048	OG0006823Hg_chrom3_TN8_18077	OG0006823chr3X12_10814
OG0006734	OG0010752Hg_chrom3_MM26_23548	OG0010752Hg_chrom3_OP50_9830	OG0010752Hg_chrom3_PA3_18992	OG0010752Hg_chrom3_TN10_14391	OG0010752Hg_chrom3_TN20_15942	OG0010752Hg_chrom3_TN22_18984	OG0010752Hg_chrom3_TN7_19050	OG0010752Hg_chrom3_TN8_18079	OG0010752chr3X12_10813
OG0006735	OG0001833Hg_chrom3_MM26_23564	OG0001833Hg_chrom3_OP50_9843	OG0001833Hg_chrom3_PA3_18972	OG0001833Hg_chrom3_TN10_14381	OG0001833Hg_chrom3_TN20_15952	OG0001833Hg_chrom3_TN22_19003	OG0001833Hg_chrom3_TN7_19071	OG0001833Hg_chrom3_TN8_18098	OG0001833chr3X12_10802
OG0006736	OG0017253Hg_chrom3_MM26_23569	OG0017253Hg_chrom3_OP50_9851	OG0017253Hg_chrom3_PA3_18966	OG0017253Hg_chrom3_TN10_14373	OG0017253Hg_chrom3_TN20_15959	OG0017253Hg_chrom3_TN22_19009	OG0017253Hg_chrom3_TN7_19076	OG0017253Hg_chrom3_TN8_18106	OG0017253chr3X12_10795
OG0006737	OG0014985Hg_chrom3_MM26_23571	OG0014985Hg_chrom3_OP50_9853	OG0014985Hg_chrom3_TN20_15961	OG0014985Hg_chrom3_TN22_19012	OG0014985Hg_chrom3_TN7_19078	OG0014985Hg_chrom3_TN8_18108	OG0014985chr3X12_10794	OG0040083Hg_chrom3_PA3_18964	OG0040083Hg_chrom3_TN10_14371
OG0006738	OG0017256Hg_chrom3_MM26_23579	OG0017256Hg_chrom3_OP50_9858	OG0017256Hg_chrom3_PA3_18955	OG0017256Hg_chrom3_TN10_14361	OG0017256Hg_chrom3_TN20_15967	OG0017256Hg_chrom3_TN22_19018	OG0017256Hg_chrom3_TN7_19083	OG0017256Hg_chrom3_TN8_18114	OG0017256chr3X12_10786
OG0006739	OG0007763Hg_chrom3_MM26_23593	OG0007763Hg_chrom3_OP50_9872	OG0007763Hg_chrom3_PA3_18942	OG0007763Hg_chrom3_TN10_14329	OG0007763Hg_chrom3_TN20_15976	OG0007763Hg_chrom3_TN22_19027	OG0007763Hg_chrom3_TN7_19097	OG0007763Hg_chrom3_TN8_18122	OG0007763chr3X12_10765
OG0006740	OG0004628Hg_chrom3_MM26_23595	OG0004628Hg_chrom3_OP50_9875	OG0004628Hg_chrom3_PA3_18940	OG0004628Hg_chrom3_TN10_14328	OG0004628Hg_chrom3_TN20_15979	OG0004628Hg_chrom3_TN22_19028	OG0004628Hg_chrom3_TN7_19100	OG0004628Hg_chrom3_TN8_18123	OG0004628chr3X12_10763
OG0006741	OG0002278Hg_chrom3_MM26_23598	OG0002278Hg_chrom3_OP50_9878	OG0002278Hg_chrom3_PA3_18935	OG0002278Hg_chrom3_TN10_14322	OG0002278Hg_chrom3_TN20_15981	OG0002278Hg_chrom3_TN22_19034	OG0002278Hg_chrom3_TN7_19106	OG0002278Hg_chrom3_TN8_18130	OG0002278chr3X12_10757
OG0006742	OG0017258Hg_chrom3_MM26_23604	OG0017258Hg_chrom3_OP50_9884	OG0017258Hg_chrom3_PA3_18930	OG0017258Hg_chrom3_TN10_14319	OG0017258Hg_chrom3_TN20_15987	OG0017258Hg_chrom3_TN22_19038	OG0017258Hg_chrom3_TN7_19109	OG0017258Hg_chrom3_TN8_18134	OG0017258chr3X12_10753
OG0006743	OG0017259Hg_chrom3_PA3_18928	OG0017259Hg_chrom3_TN10_14317	OG0017259Hg_chrom3_TN20_15988	OG0017259chr3X12_10751	OG0020080Hg_chrom3_MM26_23607	OG0020080Hg_chrom3_OP50_9887	OG0020080Hg_chrom3_TN22_19042	OG0020080Hg_chrom3_TN7_19112	OG0020080Hg_chrom3_TN8_18138
OG0006744	OG0014986Hg_chrom3_MM26_23611	OG0014986Hg_chrom3_OP50_9890	OG0014986Hg_chrom3_PA3_18925	OG0014986Hg_chrom3_TN10_14312	OG0014986Hg_chrom3_TN20_15993	OG0014986Hg_chrom3_TN22_19047	OG0014986Hg_chrom3_TN7_19115	OG0014986Hg_chrom3_TN8_18143	OG0014986chr3X12_10742
OG0006746	OG0011898Hg_chrom3_MM26_23662	OG0011898Hg_chrom3_PA3_18882	OG0011898Hg_chrom3_TN10_14277	OG0011898Hg_chrom3_TN7_19152	OG0011898Hg_chrom3_TN8_18188	OG0011898chr3X12_10702	OG0022695Hg_chrom3_OP50_9922	OG0022695Hg_chrom3_TN20_16016	OG0022695Hg_chrom3_TN22_19070
OG0006747	OG0006825Hg_chrom3_MM26_23670	OG0006825Hg_chrom3_OP50_9930	OG0006825Hg_chrom3_PA3_18875	OG0006825Hg_chrom3_TN10_14264	OG0006825Hg_chrom3_TN20_16028	OG0006825Hg_chrom3_TN22_19080	OG0006825Hg_chrom3_TN7_19162	OG0006825Hg_chrom3_TN8_18199	OG0006825chr3X12_10694
OG0006748	OG0017264Hg_chrom3_MM26_23673	OG0017264Hg_chrom3_OP50_9931	OG0017264Hg_chrom3_PA3_18874	OG0017264Hg_chrom3_TN10_14263	OG0017264Hg_chrom3_TN20_16029	OG0017264Hg_chrom3_TN22_19088	OG0017264Hg_chrom3_TN7_19163	OG0017264Hg_chrom3_TN8_18200	OG0017264chr3X12_10693
OG0006750	OG0017265Hg_chrom3_MM26_23699	OG0017265Hg_chrom3_OP50_9947	OG0017265Hg_chrom3_PA3_18855	OG0017265Hg_chrom3_TN10_14246	OG0017265Hg_chrom3_TN20_16042	OG0017265Hg_chrom3_TN22_19100	OG0017265Hg_chrom3_TN7_19182	OG0017265Hg_chrom3_TN8_18212	OG0017265chr3X12_10682
OG0006751	OG0017266Hg_chrom3_MM26_23706	OG0017266Hg_chrom3_OP50_9952	OG0017266Hg_chrom3_PA3_18851	OG0017266Hg_chrom3_TN10_14241	OG0017266Hg_chrom3_TN20_16048	OG0017266Hg_chrom3_TN22_19104	OG0017266Hg_chrom3_TN7_19185	OG0017266Hg_chrom3_TN8_18215	OG0017266chr3X12_10677
OG0006752	Hg_chrom3_TN8_18217	OG0014988Hg_chrom3_MM26_23707	OG0014988Hg_chrom3_OP50_9949	OG0014988Hg_chrom3_PA3_18849	OG0014988Hg_chrom3_TN10_14239	OG0014988Hg_chrom3_TN20_16049	OG0014988Hg_chrom3_TN22_19105	OG0014988Hg_chrom3_TN7_19187	OG0014988chr3X12_10676
OG0006753	OG0014989Hg_chrom3_MM26_23711	OG0014989Hg_chrom3_OP50_9954	OG0014989Hg_chrom3_PA3_18846	OG0014989Hg_chrom3_TN10_14235	OG0014989Hg_chrom3_TN20_16051	OG0014989Hg_chrom3_TN22_19108	OG0014989Hg_chrom3_TN7_19190	OG0014989Hg_chrom3_TN8_18220	OG0014989chr3X12_10673
OG0006754	OG0013274Hg_chrom3_OP50_9955	OG0013274Hg_chrom3_TN20_16053	OG0013274Hg_chrom3_TN7_19193	OG0020086Hg_chrom3_MM26_23714	OG0020086Hg_chrom3_PA3_18842	OG0020086Hg_chrom3_TN10_14233	OG0020086Hg_chrom3_TN22_19111	OG0020086Hg_chrom3_TN8_18223	OG0020086chr3X12_10670
OG0006755	OG0004629Hg_chrom3_MM26_23716	OG0004629Hg_chrom3_OP50_9960	OG0004629Hg_chrom3_PA3_18840	OG0004629Hg_chrom3_TN10_14228	OG0004629Hg_chrom3_TN20_16059	OG0004629Hg_chrom3_TN22_19115	OG0004629Hg_chrom3_TN7_19197	OG0004629Hg_chrom3_TN8_18227	OG0004629chr3X12_10666
OG0006756	OG0009691Hg_chrom3_MM26_23731	OG0009691Hg_chrom3_OP50_9967	OG0009691Hg_chrom3_PA3_18829	OG0009691Hg_chrom3_TN10_14216	OG0009691Hg_chrom3_TN20_16063	OG0009691Hg_chrom3_TN22_19124	OG0009691Hg_chrom3_TN7_19206	OG0009691Hg_chrom3_TN8_18237	OG0009691chr3X12_10657
OG0006757	OG0005272Hg_chrom3_MM26_23741	OG0005272Hg_chrom3_TN10_14208	OG0005272Hg_chrom3_TN20_16072	OG0005272Hg_chrom3_TN22_19130	OG0005272Hg_chrom3_TN7_19214	OG0005272Hg_chrom3_TN8_18244	OG0005272chr3X12_10644	OG0023893Hg_chrom3_OP50_9977	OG0023893Hg_chrom3_PA3_18818
OG0006758	OG0006003Hg_chrom4_MM26_23811	OG0006003Hg_chrom4_OP50_15051	OG0006003Hg_chrom4_PA3_19457	OG0006003Hg_chrom4_TN10_27281	OG0006003Hg_chrom4_TN20_16099	OG0006003Hg_chrom4_TN22_19172	OG0006003Hg_chrom4_TN7_19256	OG0006003Hg_chrom4_TN8_18328	OG0006003chr1X12_1850
OG0006760	OG0004630Hg_chrom4_MM26_23829	OG0004630Hg_chrom4_OP50_15065	OG0004630Hg_chrom4_PA3_19475	OG0004630Hg_chrom4_TN20_16122	OG0004630Hg_chrom4_TN22_19189	OG0004630Hg_chrom4_TN7_19273	OG0004630Hg_chrom4_TN8_18345	OG0004630chr1X12_1834	OG0041425Hg_chrom4_TN10_27255
OG0006761	OG0003228Hg_chrom4_MM26_23832	OG0003228Hg_chrom4_OP50_15068	OG0003228Hg_chrom4_PA3_19478	OG0003228Hg_chrom4_TN10_27252	OG0003228Hg_chrom4_TN20_16125	OG0003228Hg_chrom4_TN22_19192	OG0003228Hg_chrom4_TN7_19277	OG0003228Hg_chrom4_TN8_18348	OG0003228chr1X12_183
OG0006762	OG0007767Hg_chrom4_MM26_23841	OG0007767Hg_chrom4_PA3_19485	OG0007767Hg_chrom4_TN10_27242	OG0007767Hg_chrom4_TN8_18358	OG0007767chr1X12_1821	OG0019067Hg_chrom4_OP50_15084	OG0019067Hg_chrom4_TN20_16131	OG0019067Hg_chrom4_TN22_19201	OG0019067Hg_chrom4_TN7_19285
OG0006763	Hg_chrom4_MM26_23844	OG0009693Hg_chrom4_PA3_19488	OG0009693Hg_chrom4_TN10_27241	OG0009693Hg_chrom4_TN22_19205	OG0009693Hg_chrom4_TN7_19289	OG0009693Hg_chrom4_TN8_18360	OG0023895Hg_chrom4_OP50_15088	OG0023895Hg_chrom4_TN20_16135	OG0023895chr1X12_182
OG0006764	OG0010760Hg_chrom4_MM26_23851	OG0010760Hg_chrom4_PA3_19496	OG0010760Hg_chrom4_TN10_27232	OG0010760Hg_chrom4_TN22_19211	OG0010760Hg_chrom4_TN7_19299	OG0010760Hg_chrom4_TN8_18367	OG0010760chr1X12_1810	OG0010761Hg_chrom4_OP50_15094	OG0010761Hg_chrom4_TN20_16140
OG0006765	OG0007769Hg_chrom4_MM26_23856	OG0007769Hg_chrom4_OP50_15099	OG0007769Hg_chrom4_TN10_27228	OG0007769Hg_chrom4_TN20_16145	OG0007769Hg_chrom4_TN7_19303	OG0007769chr1X12_1808	OG0029697Hg_chrom4_PA3_19501	OG0036305Hg_chrom4_TN22_19216	OG0036305Hg_chrom4_TN8_18372
OG0006766	OG0007770Hg_chrom4_MM26_23860	OG0007770Hg_chrom4_OP50_15102	OG0007770Hg_chrom4_PA3_19502	OG0007770Hg_chrom4_TN10_27226	OG0007770Hg_chrom4_TN20_16149	OG0007770Hg_chrom4_TN22_19218	OG0007770Hg_chrom4_TN7_19305	OG0007770Hg_chrom4_TN8_18375	OG0007770chr1X12_1807
OG0006767	OG0008714Hg_chrom4_MM26_23880	OG0008714Hg_chrom4_TN22_19248	OG0008714Hg_chrom4_TN8_18395	OG0008714chr1X12_1790	OG0011384Hg_chrom4_OP50_15121	OG0011384Hg_chrom4_PA3_19530	OG0011384Hg_chrom4_TN10_27194	OG0011384Hg_chrom4_TN20_16172	OG0011384Hg_chrom4_TN7_19342
OG0006768	OG0005273Hg_chrom4_MM26_23885	OG0005273Hg_chrom4_OP50_15124	OG0005273Hg_chrom4_PA3_19534	OG0005273Hg_chrom4_TN10_27188	OG0005273Hg_chrom4_TN20_16180	OG0005273Hg_chrom4_TN22_19253	OG0005273Hg_chrom4_TN7_19346	OG0005273Hg_chrom4_TN8_18400	OG0005273chr1X12_1786
OG0006769	OG0008715Hg_chrom4_MM26_23919	OG0008715Hg_chrom4_OP50_15146	OG0008715Hg_chrom4_PA3_19559	OG0008715Hg_chrom4_TN10_27148	OG0008715Hg_chrom4_TN20_16204	OG0008715Hg_chrom4_TN22_19278	OG0008715Hg_chrom4_TN7_19379	OG0008715Hg_chrom4_TN8_18433	OG0008715chr1X12_176
OG0006770	OG0006827Hg_chrom4_OP50_15155	OG0006827Hg_chrom4_PA3_19570	OG0006827Hg_chrom4_TN10_27136	OG0006827Hg_chrom4_TN20_16215	OG0006827Hg_chrom4_TN8_18444	OG0006827chr1X12_1750	OG0032171Hg_chrom4_TN22_19291	OG0032171Hg_chrom4_TN7_19389	OG0037804Hg_chrom4_MM26_23931
OG0006772	OG0000252Hg_chrom4_MM26_23967	OG0000252Hg_chrom4_OP50_15183	OG0000252Hg_chrom4_PA3_19604	OG0000252Hg_chrom4_TN10_27097	OG0000252Hg_chrom4_TN20_16248	OG0000252Hg_chrom4_TN22_19329	OG0000252Hg_chrom4_TN7_19422	OG0000252Hg_chrom4_TN8_18478	OG0000252chr1X12_1878
OG0006773	OG0003230Hg_chrom4_MM26_23972	OG0003230Hg_chrom4_OP50_15185	OG0003230Hg_chrom4_PA3_19609	OG0003230Hg_chrom4_TN10_27093	OG0003230Hg_chrom4_TN20_16253	OG0003230Hg_chrom4_TN22_19332	OG0003230Hg_chrom4_TN7_19425	OG0003230Hg_chrom4_TN8_18480	OG0003230chr1X12_1881
OG0006774	OG0014994Hg_chrom4_MM26_23975	OG0014994Hg_chrom4_OP50_15188	OG0014994Hg_chrom4_PA3_19611	OG0014994Hg_chrom4_TN10_27091	OG0014994Hg_chrom4_TN20_16254	OG0014994Hg_chrom4_TN22_19336	OG0014994Hg_chrom4_TN7_19428	OG0014994Hg_chrom4_TN8_18482	OG0014994chr1X12_1883
OG0006775	OG0001035Hg_chrom4_MM26_23977	OG0001035Hg_chrom4_OP50_15189	OG0001035Hg_chrom4_PA3_19612	OG0001035Hg_chrom4_TN10_27087	OG0001035Hg_chrom4_TN20_16256	OG0001035Hg_chrom4_TN22_19338	OG0001035Hg_chrom4_TN7_19429	OG0001035Hg_chrom4_TN8_18484	OG0001035chr1X12_1885
OG0006776	OG0001638Hg_chrom4_MM26_23998	OG0001638Hg_chrom4_OP50_15224	OG0001638Hg_chrom4_PA3_19637	OG0001638Hg_chrom4_TN10_27066	OG0001638Hg_chrom4_TN20_16276	OG0001638Hg_chrom4_TN22_19359	OG0001638Hg_chrom4_TN7_19455	OG0001638Hg_chrom4_TN8_18508	OG0001638chr1X12_1906
OG0006777	OG0017283Hg_chrom4_TN10_27072	OG0025838Hg_chrom4_OP50_15228	OG0025838Hg_chrom4_TN22_19365	OG0025838Hg_chrom4_TN7_19462	OG0025838Hg_chrom4_TN8_18515	OG0025838chr1X12_1914	OG0033128Hg_chrom4_MM26_24005	OG0033128Hg_chrom4_PA3_19643	OG0033128Hg_chrom4_TN20_16280
OG0006778	OG0003619Hg_chrom4_MM26_24007	OG0003619Hg_chrom4_OP50_15222	OG0003619Hg_chrom4_PA3_19648	OG0003619Hg_chrom4_TN10_27060	OG0003619Hg_chrom4_TN20_16283	OG0003619Hg_chrom4_TN22_19367	OG0003619Hg_chrom4_TN7_19465	OG0003619Hg_chrom4_TN8_18517	OG0003619chr1X12_1916
OG0006779	OG0010763Hg_chrom4_MM26_24020	OG0010763Hg_chrom4_OP50_15215	OG0010763Hg_chrom4_PA3_19656	OG0010763Hg_chrom4_TN10_27051	OG0010763Hg_chrom4_TN20_16291	OG0010763Hg_chrom4_TN22_19376	OG0010763Hg_chrom4_TN7_19476	OG0010763Hg_chrom4_TN8_18527	OG0010763chr1X12_1923
OG0006780	OG0008716Hg_chrom4_MM26_24022	OG0008716Hg_chrom4_OP50_15212	OG0008716Hg_chrom4_PA3_19660	OG0008716Hg_chrom4_TN10_27049	OG0008716Hg_chrom4_TN20_16292	OG0008716Hg_chrom4_TN22_19378	OG0008716Hg_chrom4_TN7_19478	OG0008716Hg_chrom4_TN8_18529	OG0008716chr1X12_1926
OG0006781	OG0008717Hg_chrom4_MM26_24033	OG0008717Hg_chrom4_OP50_15204	OG0008717Hg_chrom4_PA3_19666	OG0008717Hg_chrom4_TN10_27041	OG0008717Hg_chrom4_TN20_16299	OG0008717Hg_chrom4_TN22_19385	OG0008717Hg_chrom4_TN7_19484	OG0008717Hg_chrom4_TN8_18536	OG0008717chr1X12_1937
OG0006782	OG0000664Hg_chrom4_MM26_24034	OG0000664Hg_chrom4_OP50_15198	OG0000664Hg_chrom4_PA3_19673	OG0000664Hg_chrom4_TN10_27032	OG0000664Hg_chrom4_TN20_16300	OG0000664Hg_chrom4_TN7_19489	OG0000664Hg_chrom4_TN8_18543	OG0000664chr1X12_1944	OG0005688Hg_chrom4_TN22_19388
OG0006783	OG0017285Hg_chrom4_MM26_24043	OG0017285Hg_chrom4_OP50_15196	OG0017285Hg_chrom4_PA3_19678	OG0017285Hg_chrom4_TN10_27028	OG0017285Hg_chrom4_TN20_16306	OG0017285Hg_chrom4_TN22_19394	OG0017285Hg_chrom4_TN7_19491	OG0017285Hg_chrom4_TN8_18546	OG0017285chr1X12_1950
OG0006784	OG0011908Hg_chrom4_MM26_24044	OG0011908Hg_chrom4_OP50_15195	OG0011908Hg_chrom4_PA3_19679	OG0011908Hg_chrom4_TN10_27026	OG0011908Hg_chrom4_TN20_16307	OG0011908Hg_chrom4_TN22_19396	OG0011908Hg_chrom4_TN7_19493	OG0011908Hg_chrom4_TN8_18548	OG0011908chr1X12_1952
OG0006785	OG0017288Hg_chrom4_MM26_24110	OG0017288Hg_chrom4_OP50_15363	OG0017288Hg_chrom4_PA3_19822	OG0017288Hg_chrom4_TN10_26827	OG0017288Hg_chrom4_TN20_16423	OG0017288Hg_chrom4_TN22_19620	OG0017288Hg_chrom4_TN7_19620	OG0017288Hg_chrom4_TN8_18741	OG0017288chr1X12_2177
OG0006786	OG0010767Hg_chrom4_MM26_24145	OG0010767Hg_chrom4_OP50_15318	OG0010767Hg_chrom4_PA3_19891	OG0010767Hg_chrom4_TN10_26886	OG0010767Hg_chrom4_TN20_16467	OG0010767Hg_chrom4_TN22_19552	OG0010767Hg_chrom4_TN8_18676	OG0036683Hg_chrom4_TN7_19697	OG0036683chr1X12_2059
OG0006787	OG0001270Hg_chrom4_MM26_24162	OG0001270Hg_chrom4_OP50_15280	OG0001270Hg_chrom4_PA3_19750	OG0001270Hg_chrom4_TN10_26951	OG0001270Hg_chrom4_TN20_16357	OG0001270Hg_chrom4_TN22_19485	OG0001270Hg_chrom4_TN7_19551	OG0001270Hg_chrom4_TN8_18615	OG0001270chr1X12_2017
OG0006789	Hg_chrom4_TN7_19531	OG0011911Hg_chrom4_MM26_24186	OG0011911Hg_chrom4_OP50_15267	OG0011911Hg_chrom4_PA3_19728	OG0011911Hg_chrom4_TN10_26973	OG0011911Hg_chrom4_TN20_16338	OG0011911Hg_chrom4_TN22_19442	OG0011911Hg_chrom4_TN8_18591	OG0011911chr1X12_2003
OG0006790	OG0015000Hg_chrom4_MM26_24190	OG0015000Hg_chrom4_OP50_15265	OG0015000Hg_chrom4_PA3_19725	OG0015000Hg_chrom4_TN10_26974	OG0015000Hg_chrom4_TN20_16336	OG0015000Hg_chrom4_TN22_19439	OG0015000Hg_chrom4_TN7_19528	OG0015000Hg_chrom4_TN8_18588	OG0015000chr1X12_2002
OG0006791	OG0000741Hg_chrom4_MM26_24193	OG0000741Hg_chrom4_OP50_15261	OG0000741Hg_chrom4_PA3_19722	OG0000741Hg_chrom4_TN10_26976	OG0000741Hg_chrom4_TN20_16333	OG0000741Hg_chrom4_TN22_19435	OG0000741Hg_chrom4_TN7_19522	OG0000741Hg_chrom4_TN8_18583	OG0000741chr1X12_2
OG0006797	OG0000828Hg_chrom4_MM26_24496	OG0000828Hg_chrom4_OP50_15528	OG0000828Hg_chrom4_PA3_20094	OG0000828Hg_chrom4_TN10_26621	OG0000828Hg_chrom4_TN20_16626	OG0000828Hg_chrom4_TN22_19815	OG0000828Hg_chrom4_TN7_19909	OG0000828Hg_chrom4_TN8_18938	OG0000828chr1X12_2558
OG0006798	Hg_chrom4_TN7_19917	OG0010773Hg_chrom4_MM26_24519	OG0010773Hg_chrom4_OP50_15537	OG0010773Hg_chrom4_PA3_20117	OG0010773Hg_chrom4_TN10_26612	OG0010773Hg_chrom4_TN20_16648	OG0010773Hg_chrom4_TN22_19840	OG0010773Hg_chrom4_TN8_18956	OG0010773chr1X12_2563
OG0006801	OG0008730Hg_chrom4_MM26_24717	OG0008730Hg_chrom8_OP50_33107	OG0008730Hg_chrom8_PA3_41557	OG0008730Hg_chrom8_TN10_45760	OG0008730Hg_chrom8_TN20_34679	OG0008730Hg_chrom8_TN22_41202	OG0008730Hg_chrom8_TN7_41759	OG0008730Hg_chrom8_TN8_40132	OG0008730chr1X12_6488
OG0006802	OG0017298Hg_chrom4_MM26_24720	OG0017298Hg_chrom4_OP50_19190	OG0017298Hg_chrom4_PA3_24210	OG0017298Hg_chrom4_TN10_22310	OG0017298Hg_chrom4_TN22_23858	OG0017298Hg_chrom4_TN7_24034	OG0017298Hg_chrom4_TN8_22949	OG0017298Hg_chrom8_TN20_34639	OG0017298chr1X12_6487
OG0006810	OG0002905Hg_chrom4_MM26_24863	OG0002905Hg_chrom4_OP50_15822	OG0002905Hg_chrom4_PA3_20498	OG0002905Hg_chrom4_TN10_26184	OG0002905Hg_chrom4_TN20_16917	OG0002905Hg_chrom4_TN22_20156	OG0002905Hg_chrom4_TN7_20252	OG0002905Hg_chrom4_TN8_19293	OG0002905chr1X12_2891
OG0006812	OG0015012Hg_chrom4_MM26_24904	OG0015012Hg_chrom4_TN10_25999	OG0023901Hg_chrom4_OP50_15785	OG0023901Hg_chrom4_PA3_20526	OG0023901Hg_chrom4_TN20_16943	OG0023901Hg_chrom4_TN22_20175	OG0023901Hg_chrom4_TN7_20390	OG0023901Hg_chrom4_TN8_19328	OG0023901chr1X12_2914
OG0006813	OG0017303Hg_chrom4_MM26_24908	OG0017303Hg_chrom4_OP50_15781	OG0017303Hg_chrom4_PA3_20530	OG0017303Hg_chrom4_TN10_26003	OG0017303Hg_chrom4_TN20_16948	OG0017303Hg_chrom4_TN22_20179	OG0017303Hg_chrom4_TN7_20387	OG0017303Hg_chrom4_TN8_19333	OG0017303chr1X12_2918
OG0006814	OG0013296Hg_chrom4_MM26_24909	OG0013296Hg_chrom4_OP50_15780	OG0013296Hg_chrom4_PA3_20531	OG0013296Hg_chrom4_TN10_26004	OG0013296Hg_chrom4_TN20_16949	OG0013296Hg_chrom4_TN22_20180	OG0013296Hg_chrom4_TN7_20385	OG0013296Hg_chrom4_TN8_19334	OG0013296chr1X12_2919
OG0006815	Hg_chrom4_MM26_24910	OG0006015Hg_chrom4_OP50_15779	OG0006015Hg_chrom4_PA3_20532	OG0006015Hg_chrom4_TN10_26005	OG0006015Hg_chrom4_TN20_16950	OG0006015Hg_chrom4_TN22_20181	OG0006015Hg_chrom4_TN7_20383	OG0006015Hg_chrom4_TN8_19339	OG0006015chr1X12_2923
OG0006816	OG0004096Hg_chrom4_MM26_24915	OG0004096Hg_chrom4_OP50_15774	OG0004096Hg_chrom4_PA3_20533	OG0004096Hg_chrom4_TN10_26008	OG0004096Hg_chrom4_TN20_16955	OG0004096Hg_chrom4_TN22_20183	OG0004096Hg_chrom4_TN7_20380	OG0004096Hg_chrom4_TN8_19341	OG0004096chr1X12_2927
OG0006817	OG0008731Hg_chrom4_MM26_24917	OG0008731Hg_chrom4_OP50_15772	OG0008731Hg_chrom4_PA3_20538	OG0008731Hg_chrom4_TN10_26010	OG0008731Hg_chrom4_TN20_16956	OG0008731Hg_chrom4_TN22_20186	OG0008731Hg_chrom4_TN7_20378	OG0008731Hg_chrom4_TN8_19343	OG0008731chr1X12_2929
OG0006818	Hg_chrom4_TN10_26027	OG0006016Hg_chrom4_MM26_24928	OG0006016Hg_chrom4_OP50_15760	OG0006016Hg_chrom4_PA3_20548	OG0006016Hg_chrom4_TN20_16968	OG0006016Hg_chrom4_TN22_20194	OG0006016Hg_chrom4_TN7_20363	OG0006016Hg_chrom4_TN8_19355	OG0006016chr1X12_294
OG0006821	OG0004638Hg_chrom4_MM26_25026	OG0004638Hg_chrom4_OP50_15952	OG0004638Hg_chrom4_PA3_20642	OG0004638Hg_chrom4_TN10_25947	OG0004638Hg_chrom4_TN20_17057	OG0004638Hg_chrom4_TN22_20284	OG0004638Hg_chrom4_TN7_20452	OG0004638Hg_chrom4_TN8_19454	OG0004638chr1X12_307
OG0006822	OG0002907Hg_chrom4_MM26_25028	OG0002907Hg_chrom4_OP50_15956	OG0002907Hg_chrom4_PA3_20644	OG0002907Hg_chrom4_TN10_25944	OG0002907Hg_chrom4_TN20_17058	OG0002907Hg_chrom4_TN22_20287	OG0002907Hg_chrom4_TN7_20457	OG0002907Hg_chrom4_TN8_19455	OG0002907chr1X12_3067
OG0006823	OG0005284Hg_chrom4_OP50_15959	OG0005284Hg_chrom4_PA3_20646	OG0005284Hg_chrom4_TN8_19458	OG0005284chr1X12_3063	OG0007789Hg_chrom4_MM26_25032	OG0007789Hg_chrom4_TN20_17060	OG0010782Hg_chrom4_TN10_25937	OG0010782Hg_chrom4_TN22_20292	OG0010782Hg_chrom4_TN7_20463
OG0006824	OG0002286Hg_chrom4_MM26_25036	OG0002286Hg_chrom4_OP50_15962	OG0002286Hg_chrom4_PA3_20650	OG0002286Hg_chrom4_TN10_25934	OG0002286Hg_chrom4_TN20_17063	OG0002286Hg_chrom4_TN22_20297	OG0002286Hg_chrom4_TN7_20468	OG0002286Hg_chrom4_TN8_19462	OG0002286chr1X12_3059
OG0006825	OG0006019Hg_chrom4_MM26_25039	OG0006019Hg_chrom4_OP50_15966	OG0006019Hg_chrom4_PA3_20653	OG0006019Hg_chrom4_TN20_17065	OG0006019Hg_chrom4_TN22_20299	OG0006019Hg_chrom4_TN7_20469	OG0006019Hg_chrom4_TN8_19466	OG0006019chr1X12_3056	OG0017308Hg_chrom4_TN10_25931
OG0006826	OG0017309Hg_chrom4_MM26_25044	OG0017309Hg_chrom4_OP50_15970	OG0017309Hg_chrom4_PA3_20658	OG0017309Hg_chrom4_TN10_25930	OG0017309Hg_chrom4_TN20_17068	OG0017309Hg_chrom4_TN22_20304	OG0017309Hg_chrom4_TN7_20473	OG0017309Hg_chrom4_TN8_19469	OG0017309chr1X12_3055
OG0006827	OG0015017Hg_chrom4_MM26_25045	OG0015017Hg_chrom4_OP50_15973	OG0015017Hg_chrom4_PA3_20660	OG0015017Hg_chrom4_TN10_25929	OG0015017Hg_chrom4_TN20_17069	OG0015017Hg_chrom4_TN22_20305	OG0015017Hg_chrom4_TN7_20475	OG0015017Hg_chrom4_TN8_19471	OG0015017chr1X12_3054
OG0006828	OG0005285Hg_chrom4_MM26_25049	OG0005285Hg_chrom4_OP50_15979	OG0005285Hg_chrom4_PA3_20664	OG0005285Hg_chrom4_TN10_25975	OG0005285Hg_chrom4_TN20_17073	OG0005285Hg_chrom4_TN22_20309	OG0005285Hg_chrom4_TN7_20479	OG0005285Hg_chrom4_TN8_19476	OG0005285chr1X12_3051
OG0006829	OG0002579Hg_chrom4_OP50_15981	OG0002579Hg_chrom4_PA3_20666	OG0002579Hg_chrom4_TN10_25917	OG0002579Hg_chrom4_TN20_17074	OG0002579Hg_chrom4_TN22_20310	OG0002579chr1X12_3049	OG0037842Hg_chrom4_MM26_25055	OG0037842Hg_chrom4_TN8_19482	OG0042257Hg_chrom4_TN7_20480
OG0006830	OG0004639Hg_chrom4_MM26_25060	OG0004639Hg_chrom4_OP50_15985	OG0004639Hg_chrom4_PA3_20670	OG0004639Hg_chrom4_TN10_25912	OG0004639Hg_chrom4_TN20_17078	OG0004639Hg_chrom4_TN22_20314	OG0004639Hg_chrom4_TN7_20484	OG0004639Hg_chrom4_TN8_19487	OG0004639chr1X12_3045
OG0006831	OG0000159Hg_chrom4_MM26_25066	OG0000159Hg_chrom4_OP50_15989	OG0000159Hg_chrom4_PA3_20674	OG0000159Hg_chrom4_TN10_25904	OG0000159Hg_chrom4_TN20_17081	OG0000159Hg_chrom4_TN22_20316	OG0000159Hg_chrom4_TN7_20488	OG0000159Hg_chrom4_TN8_19493	OG0000159chr1X12_3041
OG0006832	OG0011933Hg_chrom4_MM26_25075	OG0011933Hg_chrom4_OP50_15996	OG0011933Hg_chrom4_PA3_20680	OG0011933Hg_chrom4_TN10_25900	OG0011933Hg_chrom4_TN20_17087	OG0011933Hg_chrom4_TN22_20324	OG0011933Hg_chrom4_TN7_20497	OG0011933Hg_chrom4_TN8_19499	OG0011933chr1X12_3037
OG0006833	OG0008733Hg_chrom4_MM26_25077	OG0008733Hg_chrom4_OP50_15999	OG0008733Hg_chrom4_PA3_20683	OG0008733Hg_chrom4_TN20_17089	OG0008733Hg_chrom4_TN22_20326	OG0008733Hg_chrom4_TN7_20499	OG0008733Hg_chrom4_TN8_19502	OG0008733chr1X12_3033	OG0024865Hg_chrom4_TN10_25897
OG0006834	Hg_chrom4_PA3_20686	OG0009709Hg_chrom4_MM26_25083	OG0009709Hg_chrom4_OP50_16002	OG0009709Hg_chrom4_TN10_25892	OG0009709Hg_chrom4_TN20_17092	OG0009709Hg_chrom4_TN22_20331	OG0009709Hg_chrom4_TN7_20504	OG0009709Hg_chrom4_TN8_19506	OG0009709chr1X12_3028
OG0006835	OG0006836Hg_chrom4_MM26_25088	OG0006836Hg_chrom4_OP50_16006	OG0006836Hg_chrom4_PA3_20690	OG0006836Hg_chrom4_TN10_25888	OG0006836Hg_chrom4_TN20_17096	OG0006836Hg_chrom4_TN22_20337	OG0006836chr1X12_3024	OG0027148Hg_chrom4_TN7_20508	OG0027148Hg_chrom4_TN8_19511
OG0006837	OG0004641Hg_chrom4_MM26_25127	OG0004641Hg_chrom4_OP50_16041	OG0004641Hg_chrom4_PA3_20727	OG0004641Hg_chrom4_TN10_25851	OG0004641Hg_chrom4_TN20_17130	OG0004641Hg_chrom4_TN22_20374	OG0004641Hg_chrom4_TN7_20543	OG0004641Hg_chrom4_TN8_19551	OG0004641chr1X12_2991
OG0006839	OG0017313Hg_chrom4_MM26_25151	OG0017313Hg_chrom4_OP50_16060	OG0017313Hg_chrom4_PA3_20754	OG0017313Hg_chrom4_TN10_25819	OG0017313Hg_chrom4_TN20_17151	OG0017313Hg_chrom4_TN22_20397	OG0017313Hg_chrom4_TN7_20570	OG0017313Hg_chrom4_TN8_19575	OG0017313chr1X12_3136
OG0006840	OG0009710Hg_chrom4_MM26_25167	OG0009710Hg_chrom4_OP50_16068	OG0009710Hg_chrom4_PA3_20768	OG0009710Hg_chrom4_TN10_25817	OG0009710Hg_chrom4_TN20_17161	OG0009710Hg_chrom4_TN22_20410	OG0009710Hg_chrom4_TN7_20582	OG0009710Hg_chrom4_TN8_19593	OG0009710chr1X12_3137
OG0006841	OG0004643Hg_chrom4_MM26_25174	OG0004643Hg_chrom4_OP50_16072	OG0004643Hg_chrom4_PA3_20776	OG0004643Hg_chrom4_TN10_25812	OG0004643Hg_chrom4_TN20_17167	OG0004643Hg_chrom4_TN22_20416	OG0004643Hg_chrom4_TN7_20587	OG0004643Hg_chrom4_TN8_19597	OG0004643chr1X12_3144
OG0006842	Hg_chrom4_OP50_16076	Hg_chrom4_TN7_20594	OG0015019Hg_chrom4_PA3_20782	OG0015019Hg_chrom4_TN22_20424	OG0015019Hg_chrom4_TN8_19603	OG0037847Hg_chrom4_MM26_25181	OG0037847chr1X12_3149	OG0041385Hg_chrom4_TN10_25808	OG0041385Hg_chrom4_TN20_17172
OG0006844	OG0013304Hg_chrom4_MM26_25201	OG0013304Hg_chrom4_TN10_25791	OG0013304Hg_chrom4_TN7_20615	OG0021724Hg_chrom4_OP50_16096	OG0021724Hg_chrom4_PA3_20806	OG0021724Hg_chrom4_TN20_17188	OG0021724Hg_chrom4_TN22_20446	OG0021724Hg_chrom4_TN8_19626	OG0021724chr1X12_317
OG0006845	OG0007794Hg_chrom4_MM26_25225	OG0007794Hg_chrom4_OP50_16101	OG0007794Hg_chrom4_PA3_20812	OG0007794Hg_chrom4_TN10_25785	OG0007794Hg_chrom4_TN20_17194	OG0007794Hg_chrom4_TN22_20452	OG0007794Hg_chrom4_TN7_20620	OG0007794Hg_chrom4_TN8_19631	OG0007794chr1X12_3174
OG0006846	OG0009712chr1X12_3176	OG0015020Hg_chrom4_MM26_25228	OG0015020Hg_chrom4_OP50_16103	OG0015020Hg_chrom4_PA3_20814	OG0015020Hg_chrom4_TN10_25780	OG0015020Hg_chrom4_TN20_17197	OG0015020Hg_chrom4_TN22_20455	OG0015020Hg_chrom4_TN7_20625	OG0015020Hg_chrom4_TN8_19634
OG0006847	OG0015021Hg_chrom4_MM26_25231	OG0015021Hg_chrom4_OP50_16106	OG0015021Hg_chrom4_PA3_20816	OG0015021Hg_chrom4_TN10_25778	OG0015021Hg_chrom4_TN20_17198	OG0015021Hg_chrom4_TN22_20458	OG0015021Hg_chrom4_TN7_20626	OG0015021Hg_chrom4_TN8_19637	OG0015021chr1X12_318
OG0006848	OG0003622Hg_chrom4_MM26_25237	OG0003622Hg_chrom4_OP50_16110	OG0003622Hg_chrom4_PA3_20821	OG0003622Hg_chrom4_TN10_25771	OG0003622Hg_chrom4_TN22_20462	OG0003622Hg_chrom4_TN7_20632	OG0003622Hg_chrom4_TN8_19641	OG0003622chr1X12_3184	OG0027153Hg_chrom4_TN20_17201
OG0006849	OG0015022Hg_chrom4_MM26_25243	OG0015022Hg_chrom4_PA3_20825	OG0015022Hg_chrom4_TN10_25765	OG0015022Hg_chrom4_TN7_20638	OG0015022Hg_chrom4_TN8_19648	OG0028099Hg_chrom4_OP50_16116	OG0028099Hg_chrom4_TN20_17206	OG0028099Hg_chrom4_TN22_20468	OG0028099chr1X12_3190
OG0006850	OG0004644Hg_chrom4_MM26_25245	OG0004644Hg_chrom4_OP50_16119	OG0004644Hg_chrom4_PA3_20827	OG0004644Hg_chrom4_TN10_25758	OG0004644Hg_chrom4_TN20_17207	OG0004644Hg_chrom4_TN22_20470	OG0004644Hg_chrom4_TN7_20641	OG0004644Hg_chrom4_TN8_19650	chr1X12_3194
OG0006852	Hg_chrom4_MM26_25315	OG0004645Hg_chrom4_OP50_16152	OG0004645Hg_chrom4_PA3_20868	OG0004645Hg_chrom4_TN10_25716	OG0004645Hg_chrom4_TN20_17239	OG0004645Hg_chrom4_TN22_20517	OG0004645Hg_chrom4_TN7_20683	OG0004645Hg_chrom4_TN8_19689	OG0004645chr1X12_3223
OG0006853	OG0007796Hg_chrom4_MM26_25318	OG0007796Hg_chrom4_OP50_16155	OG0007796Hg_chrom4_PA3_20872	OG0007796Hg_chrom4_TN10_25713	OG0007796Hg_chrom4_TN20_17241	OG0007796Hg_chrom4_TN22_20520	OG0007796Hg_chrom4_TN7_20685	OG0007796chr1X12_3226	OG0020137Hg_chrom4_TN8_19692
OG0006854	OG0007797Hg_chrom4_MM26_25326	OG0007797Hg_chrom4_PA3_20878	OG0007797Hg_chrom4_TN20_17247	OG0007797Hg_chrom4_TN22_20526	OG0007797Hg_chrom4_TN7_20693	OG0007797Hg_chrom4_TN8_19698	OG0007797chr1X12_3233	OG0022732Hg_chrom4_OP50_16160	OG0022732Hg_chrom4_TN10_25705
OG0006855	OG0015024Hg_chrom4_MM26_25331	OG0015024Hg_chrom4_OP50_16163	OG0015024Hg_chrom4_PA3_20881	OG0015024Hg_chrom4_TN10_25703	OG0015024Hg_chrom4_TN20_17249	OG0015024Hg_chrom4_TN22_20529	OG0015024Hg_chrom4_TN7_20698	OG0015024Hg_chrom4_TN8_19701	OG0015024chr1X12_3235
OG0006856	OG0001272Hg_chrom4_MM26_25336	OG0001272Hg_chrom4_PA3_20886	OG0001272Hg_chrom4_TN10_25693	OG0001272Hg_chrom4_TN20_17255	OG0001272Hg_chrom4_TN22_20534	OG0001272Hg_chrom4_TN7_20701	OG0001272Hg_chrom4_TN8_19706	OG0001272chr1X12_324	OG0001433Hg_chrom4_OP50_16170
OG0006857	OG0002287Hg_chrom4_MM26_25343	OG0002287Hg_chrom4_OP50_16177	OG0002287Hg_chrom4_PA3_20897	OG0002287Hg_chrom4_TN10_25686	OG0002287Hg_chrom4_TN20_17264	OG0002287Hg_chrom4_TN22_20545	OG0002287Hg_chrom4_TN7_20712	OG0002287Hg_chrom4_TN8_19719	OG0002287chr1X12_3250
OG0006858	OG0006022Hg_chrom4_MM26_25365	OG0006022Hg_chrom4_OP50_16194	OG0006022Hg_chrom4_PA3_20918	OG0006022Hg_chrom4_TN10_25660	OG0006022Hg_chrom4_TN20_17280	OG0006022Hg_chrom4_TN22_20564	OG0006022Hg_chrom4_TN7_20731	OG0006022Hg_chrom4_TN8_19743	chr1X12_3730
OG0006859	Hg_chrom4_TN7_20745	OG0011943Hg_chrom4_OP50_16205	OG0011943Hg_chrom4_TN10_25652	OG0011943Hg_chrom4_TN20_17287	OG0011943Hg_chrom4_TN22_20579	OG0020140chr1X12_3282	OG0022734Hg_chrom4_MM26_25377	OG0022734Hg_chrom4_PA3_20931	OG0022734Hg_chrom4_TN8_19757
OG0006861	OG0013309Hg_chrom4_MM26_25400	OG0013309Hg_chrom4_OP50_16232	OG0013309Hg_chrom4_PA3_20958	OG0013309Hg_chrom4_TN10_25639	OG0013309Hg_chrom4_TN20_17314	OG0013309Hg_chrom4_TN22_20613	OG0013309Hg_chrom4_TN7_20773	OG0013309Hg_chrom4_TN8_19783	chr1X12_3304
OG0006862	OG0006843Hg_chrom4_MM26_25429	OG0006843Hg_chrom4_OP50_16254	OG0006843Hg_chrom4_PA3_20979	OG0006843Hg_chrom4_TN10_25615	OG0006843Hg_chrom4_TN20_17335	OG0006843Hg_chrom4_TN22_20632	OG0020142Hg_chrom4_TN7_20794	OG0020142Hg_chrom4_TN8_19805	OG0020142chr1X12_3323
OG0006863	OG0017322Hg_chrom4_MM26_25444	OG0017322Hg_chrom4_TN10_25598	OG0017322chr1X12_3342	OG0023908Hg_chrom4_OP50_16268	OG0023908Hg_chrom4_TN22_20642	OG0023908Hg_chrom4_TN7_20816	OG0023908Hg_chrom4_TN8_19829	OG0033160Hg_chrom4_PA3_20995	OG0033160Hg_chrom4_TN20_17349
OG0006864	OG0015027Hg_chrom4_MM26_25446	OG0015027Hg_chrom4_OP50_16271	OG0015027Hg_chrom4_PA3_20999	OG0015027Hg_chrom4_TN10_25594	OG0015027Hg_chrom4_TN20_17352	OG0015027Hg_chrom4_TN22_20648	OG0015027Hg_chrom4_TN7_20822	OG0015027chr1X12_3347	OG0028768Hg_chrom4_TN8_19834
OG0006865	OG0013313Hg_chrom4_MM26_25452	OG0013313Hg_chrom4_OP50_16272	OG0013313Hg_chrom4_PA3_21004	OG0013313Hg_chrom4_TN7_20829	OG0013313Hg_chrom4_TN8_19842	OG0013313chr1X12_3353	OG0017323Hg_chrom4_TN10_25589	OG0042262Hg_chrom4_TN20_17353	OG0042262Hg_chrom4_TN22_20663
OG0006866	OG0016368Hg_chrom4_MM26_25466	OG0016368Hg_chrom4_TN10_25564	OG0016368Hg_chrom4_TN22_20668	OG0016368Hg_chrom4_TN8_19853	OG0024876Hg_chrom4_TN20_17363	OG0031313Hg_chrom4_PA3_21017	OG0031313Hg_chrom4_TN7_20845	OG0034250Hg_chrom4_OP50_16291	OG0034250chr1X12_3365
OG0006867	OG0001843Hg_chrom4_MM26_25470	OG0001843Hg_chrom4_OP50_16293	OG0001843Hg_chrom4_PA3_21024	OG0001843Hg_chrom4_TN10_25556	OG0001843Hg_chrom4_TN20_17366	OG0001843Hg_chrom4_TN22_20671	OG0001843Hg_chrom4_TN7_20849	OG0001843Hg_chrom4_TN8_19860	OG0001843chr1X12_3369
OG0006868	OG0021728Hg_chrom4_PA3_21029	OG0021728Hg_chrom4_TN10_25548	OG0021728Hg_chrom4_TN20_17369	OG0021728Hg_chrom4_TN22_20680	OG0021728Hg_chrom4_TN7_20857	OG0021728Hg_chrom4_TN8_19866	OG0021728chr1X12_3375	OG0037860Hg_chrom4_MM26_25475	OG0037860Hg_chrom4_OP50_16296
OG0006869	OG0007799Hg_chrom4_OP50_16298	OG0007799Hg_chrom4_TN20_17371	OG0015032Hg_chrom4_MM26_25476	OG0015032Hg_chrom4_TN10_25547	OG0015032Hg_chrom4_TN22_20681	OG0015032Hg_chrom4_TN8_19867	OG0015032chr1X12_3376	OG0040119Hg_chrom4_PA3_21030	OG0040119Hg_chrom4_TN7_20858
OG0006870	OG0003240Hg_chrom4_MM26_25490	OG0003240Hg_chrom4_OP50_16307	OG0003240Hg_chrom4_PA3_21048	OG0003240Hg_chrom4_TN10_25527	OG0003240Hg_chrom4_TN20_17379	OG0003240Hg_chrom4_TN22_20697	OG0003240Hg_chrom4_TN8_19885	OG0003240chr1X12_3388	OG0009717Hg_chrom4_TN7_20868
OG0006872	OG0011946Hg_chrom4_PA3_21081	OG0011946Hg_chrom4_TN10_25514	OG0011946Hg_chrom4_TN22_20733	OG0011946Hg_chrom4_TN8_19905	OG0011946chr1X12_3412	OG0027165Hg_chrom4_MM26_25526	OG0027165Hg_chrom4_OP50_16330	OG0027165Hg_chrom4_TN20_17407	OG0027165Hg_chrom4_TN7_20903
OG0006873	OG0004648Hg_chrom4_MM26_25542	OG0004648Hg_chrom4_OP50_16343	OG0004648Hg_chrom4_PA3_21094	OG0004648Hg_chrom4_TN10_25503	OG0004648Hg_chrom4_TN20_17418	OG0004648Hg_chrom4_TN22_20751	OG0004648Hg_chrom4_TN7_20919	OG0004648Hg_chrom4_TN8_19920	OG0004648chr1X12_3424
OG0006874	OG0015034Hg_chrom4_MM26_25543	OG0015034Hg_chrom4_OP50_16345	OG0015034Hg_chrom4_PA3_21096	OG0015034Hg_chrom4_TN10_25502	OG0015034Hg_chrom4_TN20_17420	OG0015034Hg_chrom4_TN22_20752	OG0015034Hg_chrom4_TN7_20920	OG0015034Hg_chrom4_TN8_19922	OG0015034chr1X12_3425
OG0006875	OG0002288Hg_chrom4_MM26_25546	OG0002288Hg_chrom4_OP50_16347	OG0002288Hg_chrom4_PA3_21097	OG0002288Hg_chrom4_TN20_17423	OG0002288Hg_chrom4_TN22_20753	OG0002288Hg_chrom4_TN7_20921	OG0002288Hg_chrom4_TN8_19923	OG0002288chr1X12_3428	OG0022737Hg_chrom4_TN10_25501
OG0006876	OG0008743Hg_chrom4_MM26_25549	OG0008743Hg_chrom4_OP50_16352	OG0008743Hg_chrom4_PA3_21100	OG0008743Hg_chrom4_TN10_25497	OG0008743Hg_chrom4_TN20_17426	OG0008743Hg_chrom4_TN22_20756	OG0008743Hg_chrom4_TN7_20925	OG0008743Hg_chrom4_TN8_19927	OG0008743chr1X12_3430
OG0006877	OG0017325Hg_chrom4_MM26_25551	OG0017325Hg_chrom4_PA3_21102	OG0017325Hg_chrom4_TN10_25495	OG0017325Hg_chrom4_TN22_20758	OG0017325Hg_chrom4_TN7_20927	OG0017325Hg_chrom4_TN8_19929	OG0017325chr1X12_3432	OG0039131Hg_chrom4_OP50_16356	OG0039131Hg_chrom4_TN20_17430
OG0006878	OG0000280Hg_chrom4_TN10_25485	OG0003241Hg_chrom4_MM26_25557	OG0003241Hg_chrom4_OP50_16357	OG0003241Hg_chrom4_PA3_21105	OG0003241Hg_chrom4_TN20_17431	OG0003241Hg_chrom4_TN22_20767	OG0003241Hg_chrom4_TN7_20931	OG0003241Hg_chrom4_TN8_19940	OG0003241chr1X12_3442
OG0006879	OG0002048Hg_chrom4_MM26_25610	OG0002048Hg_chrom4_OP50_16387	OG0002048Hg_chrom4_PA3_21154	OG0002048Hg_chrom4_TN10_25441	OG0002048Hg_chrom4_TN20_17464	OG0002048Hg_chrom4_TN22_20803	OG0002048Hg_chrom4_TN7_20979	OG0002048Hg_chrom4_TN8_19984	chr1X12_3459
OG0006880	OG0004104Hg_chrom4_MM26_25614	OG0004104Hg_chrom4_OP50_16390	OG0004104Hg_chrom4_PA3_21155	OG0004104Hg_chrom4_TN10_25435	OG0004104Hg_chrom4_TN20_17467	OG0004104Hg_chrom4_TN22_20808	OG0004104Hg_chrom4_TN7_20984	OG0004104Hg_chrom4_TN8_19988	OG0004104chr1X12_3467
OG0006881	Hg_chrom4_TN7_20987	OG0004105Hg_chrom4_MM26_25616	OG0004105Hg_chrom4_OP50_16392	OG0004105Hg_chrom4_PA3_21160	OG0004105Hg_chrom4_TN22_20810	OG0004105Hg_chrom4_TN8_19992	OG0027166Hg_chrom4_TN10_25432	OG0027166Hg_chrom4_TN20_17469	OG0027166chr1X12_3469
OG0006882	OG0017329Hg_chrom4_MM26_25623	OG0017329Hg_chrom4_OP50_16396	OG0017329Hg_chrom4_PA3_21164	OG0017329Hg_chrom4_TN10_25423	OG0017329Hg_chrom4_TN20_17474	OG0017329Hg_chrom4_TN22_20813	OG0017329Hg_chrom4_TN7_20989	OG0017329Hg_chrom4_TN8_19996	OG0017329chr1X12_3473
OG0006883	Hg_chrom4_TN10_25411	OG0017331Hg_chrom4_OP50_16403	OG0017331Hg_chrom4_PA3_21174	OG0017331Hg_chrom4_TN20_17481	OG0017331Hg_chrom4_TN7_20996	OG0027167Hg_chrom4_MM26_25630	OG0027167Hg_chrom4_TN22_20824	OG0027167Hg_chrom4_TN8_20005	OG0027167chr1X12_3482
OG0006884	OG0005290Hg_chrom4_MM26_25639	OG0005290Hg_chrom4_PA3_21181	OG0005290Hg_chrom4_TN10_25397	OG0005290Hg_chrom4_TN20_17488	OG0005290Hg_chrom4_TN22_20837	OG0005290Hg_chrom4_TN8_20017	OG0005290chr1X12_370	OG0039133Hg_chrom4_OP50_16414	OG0039133Hg_chrom4_TN7_21006
OG0006885	OG0004649Hg_chrom4_OP50_16418	OG0004649Hg_chrom4_TN10_25390	OG0004649Hg_chrom4_TN20_17494	OG0004649chr1X12_3497	OG0013319Hg_chrom4_MM26_25646	OG0013319Hg_chrom4_PA3_21191	OG0032178Hg_chrom4_TN22_20845	OG0032178Hg_chrom4_TN7_21012	OG0042786Hg_chrom4_TN8_20023
OG0006886	OG0006026Hg_chrom4_MM26_25653	OG0006026Hg_chrom4_OP50_16425	OG0006026Hg_chrom4_PA3_21196	OG0006026Hg_chrom4_TN10_25385	OG0006026Hg_chrom4_TN20_17500	OG0006026Hg_chrom4_TN7_21017	OG0006026chr1X12_3502	OG0042787Hg_chrom4_TN22_20855	OG0042787Hg_chrom4_TN8_20034
OG0006888	OG0015041Hg_chrom4_MM26_25698	OG0015041Hg_chrom4_OP50_16447	OG0015041Hg_chrom4_PA3_21216	OG0015041Hg_chrom4_TN10_25358	OG0015041Hg_chrom4_TN20_17527	OG0015041Hg_chrom4_TN22_20875	OG0015041Hg_chrom4_TN7_21037	OG0015041Hg_chrom4_TN8_20053	OG0015041chr1X12_3525
OG0006889	OG0017338Hg_chrom4_MM26_25699	OG0017338Hg_chrom4_OP50_16446	OG0017338Hg_chrom4_PA3_21218	OG0017338Hg_chrom4_TN20_17526	OG0017338Hg_chrom4_TN22_20876	OG0017338Hg_chrom4_TN7_21038	OG0017338Hg_chrom4_TN8_20054	OG0017338chr1X12_3526	OG0022739Hg_chrom4_TN10_25356
OG0006890	OG0006847Hg_chrom4_MM26_25702	OG0006847Hg_chrom4_OP50_16448	OG0006847Hg_chrom4_PA3_21220	OG0006847Hg_chrom4_TN10_25354	OG0006847Hg_chrom4_TN20_17529	OG0006847Hg_chrom4_TN22_20879	OG0006847Hg_chrom4_TN7_21040	OG0006847Hg_chrom4_TN8_20056	OG0006847chr1X12_3528
OG0006891	Hg_chrom4_TN22_20880	OG0013320Hg_chrom4_MM26_25706	OG0013320Hg_chrom4_PA3_21221	OG0013320Hg_chrom4_TN10_25353	OG0013320Hg_chrom4_TN7_21042	OG0013320Hg_chrom4_TN8_20058	OG0013320chr1X12_3529	OG0034255Hg_chrom4_OP50_16451	OG0034255Hg_chrom4_TN20_17531
OG0006892	OG0013322Hg_chrom4_MM26_25741	OG0013322Hg_chrom4_OP50_16467	OG0013322Hg_chrom4_PA3_21246	OG0013322Hg_chrom4_TN10_25329	OG0013322Hg_chrom4_TN20_17547	OG0013322Hg_chrom4_TN22_20910	OG0013322Hg_chrom4_TN7_21076	OG0013322Hg_chrom4_TN8_20086	OG0013322chr1X12_3552
OG0006893	OG0011947Hg_chrom4_MM26_25742	OG0011947Hg_chrom4_OP50_16469	OG0011947Hg_chrom4_PA3_21249	OG0011947Hg_chrom4_TN10_25324	OG0011947Hg_chrom4_TN20_17549	OG0032179Hg_chrom4_TN22_20913	OG0032179Hg_chrom4_TN7_21078	OG0032179Hg_chrom4_TN8_20088	OG0032179chr1X12_3555
OG0006894	OG0017340Hg_chrom4_MM26_25750	OG0017340Hg_chrom4_OP50_16476	OG0017340Hg_chrom4_PA3_21259	OG0017340Hg_chrom4_TN10_25312	OG0017340Hg_chrom4_TN20_17556	OG0017340Hg_chrom4_TN22_20920	OG0017340Hg_chrom4_TN7_21085	OG0017340Hg_chrom4_TN8_20095	chr1X12_3561
OG0006895	OG0017341Hg_chrom4_MM26_25758	OG0017341Hg_chrom4_OP50_16479	OG0017341Hg_chrom4_PA3_21266	OG0017341Hg_chrom4_TN10_25305	OG0017341Hg_chrom4_TN20_17560	OG0017341Hg_chrom4_TN22_20926	OG0017341Hg_chrom4_TN7_21091	OG0017341Hg_chrom4_TN8_20101	OG0022741chr1X12_3567
OG0006896	OG0003626Hg_chrom4_PA3_21268	OG0003626Hg_chrom4_TN10_25299	OG0003626Hg_chrom4_TN22_20929	OG0003626Hg_chrom4_TN7_21094	OG0003626Hg_chrom4_TN8_20105	OG0003626chr1X12_3569	OG0017342Hg_chrom4_MM26_25762	OG0017342Hg_chrom4_OP50_16480	OG0017342Hg_chrom4_TN20_17564
OG0006897	OG0006027Hg_chrom4_OP50_16486	OG0006027Hg_chrom4_PA3_21273	OG0006027Hg_chrom4_TN20_17569	OG0006027Hg_chrom4_TN22_20934	OG0006027Hg_chrom4_TN8_20112	OG0006027chr1X12_3579	OG0033168Hg_chrom4_MM26_25769	OG0033168Hg_chrom4_TN7_21105	OG0035574Hg_chrom4_TN10_25291
OG0006898	Hg_chrom4_TN10_25286	OG0004107Hg_chrom4_OP50_16488	OG0004107Hg_chrom4_PA3_21282	OG0004107Hg_chrom4_TN20_17570	OG0004107Hg_chrom4_TN22_20941	OG0004107Hg_chrom4_TN7_21110	OG0004107Hg_chrom4_TN8_20117	OG0029738Hg_chrom4_MM26_25775	OG0029738chr1X12_3581
OG0006899	OG0001037Hg_chrom4_MM26_25776	OG0001037Hg_chrom4_OP50_16491	OG0001037Hg_chrom4_PA3_21286	OG0001037Hg_chrom4_TN10_25280	OG0001037Hg_chrom4_TN20_17577	OG0001037Hg_chrom4_TN22_20946	OG0001037Hg_chrom4_TN7_21114	OG0001037Hg_chrom4_TN8_20119	OG0001037chr1X12_3583
OG0006900	OG0006028Hg_chrom4_MM26_25783	OG0006028Hg_chrom4_OP50_16495	OG0006028Hg_chrom4_PA3_21294	OG0006028Hg_chrom4_TN10_25277	OG0006028Hg_chrom4_TN20_17580	OG0006028Hg_chrom4_TN22_20951	OG0006028Hg_chrom4_TN7_21120	OG0006028Hg_chrom4_TN8_20124	OG0006028chr1X12_3592
OG0006901	OG0011948Hg_chrom4_MM26_25787	OG0011948Hg_chrom4_OP50_16496	OG0011948Hg_chrom4_TN20_17584	OG0011948Hg_chrom4_TN8_20130	OG0016260Hg_chrom4_PA3_21302	OG0016260Hg_chrom4_TN10_25271	OG0016260Hg_chrom4_TN22_20957	OG0016260Hg_chrom4_TN7_21129	OG0016260chr1X12_3596
OG0006902	OG0007806Hg_chrom4_MM26_25800	OG0007806Hg_chrom4_OP50_16512	OG0007806Hg_chrom4_TN22_20971	OG0007806Hg_chrom4_TN7_21142	OG0007806chr1X12_3607	OG0017345Hg_chrom4_TN10_25257	OG0036028Hg_chrom4_TN20_17598	OG0036028Hg_chrom4_TN8_20146	OG0040129Hg_chrom4_PA3_21314
OG0006903	OG0017346Hg_chrom4_MM26_25804	OG0017346Hg_chrom4_OP50_16514	OG0017346Hg_chrom4_PA3_21315	OG0017346Hg_chrom4_TN10_25253	OG0017346Hg_chrom4_TN20_17600	OG0017346Hg_chrom4_TN22_20975	OG0017346Hg_chrom4_TN7_21145	OG0017346Hg_chrom4_TN8_20147	OG0017346chr1X12_361
OG0006904	OG0006849Hg_chrom4_MM26_25831	OG0006849Hg_chrom4_OP50_16525	OG0006849Hg_chrom4_PA3_21320	OG0006849Hg_chrom4_TN10_25232	OG0006849Hg_chrom4_TN20_17606	OG0006849Hg_chrom4_TN22_20989	OG0006849Hg_chrom4_TN7_21153	OG0006849Hg_chrom4_TN8_20153	OG0006849chr1X12_3625
OG0006905	OG0014229Hg_chrom4_TN7_21159	OG0016176Hg_chrom4_OP50_16529	OG0017348Hg_chrom4_PA3_21325	OG0017348Hg_chrom4_TN20_17611	OG0017348Hg_chrom4_TN8_20157	OG0020165Hg_chrom4_TN10_25224	OG0024882Hg_chrom4_TN22_20995	OG0029741Hg_chrom4_MM26_25834	OG0029741chr1X12_3628
OG0006906	OG0015044Hg_chrom4_MM26_25839	OG0015044Hg_chrom4_OP50_16531	OG0015044Hg_chrom4_PA3_21329	OG0015044Hg_chrom4_TN10_25222	OG0015044Hg_chrom4_TN20_17613	OG0015044Hg_chrom4_TN22_20998	OG0015044Hg_chrom4_TN7_21161	OG0015044Hg_chrom4_TN8_20161	OG0015044chr1X12_3631
OG0006907	OG0013325Hg_chrom4_MM26_25840	OG0013325Hg_chrom4_OP50_16533	OG0013325Hg_chrom4_PA3_21330	OG0013325Hg_chrom4_TN10_25220	OG0013325Hg_chrom4_TN20_17614	OG0013325Hg_chrom4_TN7_21163	OG0013325Hg_chrom4_TN8_20162	OG0013325chr1X12_3632	OG0035572Hg_chrom4_TN22_21000
OG0006908	Hg_chrom4_TN8_20163	OG0017349Hg_chrom4_MM26_25844	OG0017349Hg_chrom4_OP50_16534	OG0017349Hg_chrom4_PA3_21336	OG0017349Hg_chrom4_TN10_25217	OG0017349Hg_chrom4_TN20_17618	OG0017349Hg_chrom4_TN22_21002	OG0017349Hg_chrom4_TN7_21165	OG0017349chr1X12_3636
OG0006909	OG0001845Hg_chrom4_MM26_25862	OG0001845Hg_chrom4_OP50_16547	OG0001845Hg_chrom4_PA3_21355	OG0001845Hg_chrom4_TN10_25204	OG0001845Hg_chrom4_TN20_17637	OG0001845Hg_chrom4_TN22_21012	OG0001845Hg_chrom4_TN7_21181	OG0001845Hg_chrom4_TN8_20177	OG0001845chr1X12_3652
OG0006910	OG0008752Hg_chrom4_MM26_25915	OG0008752Hg_chrom4_OP50_16587	OG0008752Hg_chrom4_TN20_17676	OG0008752Hg_chrom4_TN22_21061	OG0008752Hg_chrom4_TN7_21231	OG0008752Hg_chrom4_TN8_20223	OG0008752chr1X12_5955	OG0040131Hg_chrom4_PA3_21399	OG0040131Hg_chrom4_TN10_25145
OG0006911	Hg_chrom4_OP50_16608	OG0004108Hg_chrom4_PA3_21408	OG0004108Hg_chrom4_TN22_21068	OG0005294Hg_chrom4_MM26_25932	OG0005294Hg_chrom4_TN20_17690	OG0005294Hg_chrom4_TN7_21244	OG0005294Hg_chrom4_TN8_20237	OG0005294chr1X12_5969	OG0028766Hg_chrom4_TN10_25123
OG0006912	Hg_chrom4_MM26_25936	OG0000254Hg_chrom4_OP50_16615	OG0000254Hg_chrom4_PA3_21417	OG0000254Hg_chrom4_TN10_25117	OG0000254Hg_chrom4_TN20_17697	OG0000254Hg_chrom4_TN22_21077	OG0000254Hg_chrom4_TN7_21249	OG0000254Hg_chrom4_TN8_20244	OG0000254chr1X12_5977
OG0006913	Hg_chrom4_TN10_25100	OG0017364Hg_chrom4_MM26_25974	OG0017364Hg_chrom4_OP50_16639	OG0017364Hg_chrom4_PA3_21446	OG0017364Hg_chrom4_TN20_17724	OG0017364Hg_chrom4_TN22_21100	OG0017364Hg_chrom4_TN7_21269	OG0017364Hg_chrom4_TN8_20267	OG0017364chr1X12_6022
OG0006914	OG0015051Hg_chrom4_OP50_16640	OG0015051Hg_chrom4_TN20_17722	OG0015051Hg_chrom4_TN8_20270	OG0015051chr1X12_6025	OG0022748Hg_chrom4_MM26_25976	OG0022748Hg_chrom4_PA3_21447	OG0022748Hg_chrom4_TN10_25098	OG0022748Hg_chrom4_TN22_21102	OG0022748Hg_chrom4_TN7_21271
OG0006915	OG0013329Hg_chrom4_MM26_25996	OG0013329Hg_chrom4_OP50_16669	OG0013329Hg_chrom4_PA3_21477	OG0013329Hg_chrom4_TN10_25054	OG0013329Hg_chrom4_TN20_17755	OG0013329Hg_chrom4_TN22_21139	OG0013329Hg_chrom4_TN7_21307	OG0013329Hg_chrom4_TN8_20310	OG0013329chr1X12_6052
OG0006916	OG0017368Hg_chrom4_MM26_26000	OG0017368Hg_chrom4_OP50_16674	OG0017368Hg_chrom4_TN10_25051	OG0017368Hg_chrom4_TN20_17759	OG0017368Hg_chrom4_TN8_20313	OG0017368chr1X12_6057	OG0027177Hg_chrom4_PA3_21483	OG0027177Hg_chrom4_TN22_21144	OG0027177Hg_chrom4_TN7_21314
OG0006917	Hg_chrom4_OP50_16680	OG0005295Hg_chrom4_MM26_26004	OG0005295Hg_chrom4_PA3_21487	OG0005295Hg_chrom4_TN10_25048	OG0005295Hg_chrom4_TN20_17763	OG0005295Hg_chrom4_TN22_21147	OG0005295Hg_chrom4_TN7_21318	OG0005295Hg_chrom4_TN8_20317	OG0005295chr1X12_6060
OG0006918	OG0002912Hg_chrom4_OP50_16682	OG0002912Hg_chrom4_PA3_21495	OG0002912Hg_chrom4_TN10_25043	OG0002912Hg_chrom4_TN20_17768	OG0002912Hg_chrom4_TN22_21151	OG0002912Hg_chrom4_TN7_21324	OG0002912Hg_chrom4_TN8_20323	OG0002912chr1X12_6064	OG0033172Hg_chrom4_MM26_26009
OG0006919	OG0006853Hg_chrom4_TN20_17776	OG0017370Hg_chrom4_MM26_26015	OG0017370Hg_chrom4_OP50_16687	OG0017370Hg_chrom4_PA3_21500	OG0017370Hg_chrom4_TN10_25036	OG0017370Hg_chrom4_TN22_21159	OG0017370Hg_chrom4_TN7_21329	OG0017370Hg_chrom4_TN8_20328	OG0017370chr1X12_6070
OG0006920	OG0006034Hg_chrom4_MM26_26020	OG0006034Hg_chrom4_OP50_16693	OG0006034Hg_chrom4_PA3_21505	OG0006034Hg_chrom4_TN10_25033	OG0006034Hg_chrom4_TN20_17777	OG0006034Hg_chrom4_TN22_21163	OG0006034Hg_chrom4_TN7_21333	OG0006034Hg_chrom4_TN8_20331	OG0006034chr1X12_6074
OG0006921	OG0011952Hg_chrom4_MM26_26028	OG0011952Hg_chrom4_OP50_16697	OG0011952Hg_chrom4_TN20_17783	OG0022751Hg_chrom4_PA3_21511	OG0022751Hg_chrom4_TN10_25029	OG0022751Hg_chrom4_TN22_21169	OG0022751Hg_chrom4_TN7_21339	OG0022751Hg_chrom4_TN8_20335	OG0022751chr1X12_6077
OG0006922	OG0002581Hg_chrom4_MM26_26031	OG0002581Hg_chrom4_OP50_16704	OG0002581Hg_chrom4_PA3_21516	OG0002581Hg_chrom4_TN10_25020	OG0002581Hg_chrom4_TN22_21174	OG0002581Hg_chrom4_TN7_21346	OG0002581Hg_chrom4_TN8_20343	OG0005297Hg_chrom4_TN20_17784	OG0005297chr1X12_6080
OG0006923	OG0009722Hg_chrom4_MM26_26034	OG0009722Hg_chrom4_OP50_16708	OG0009722Hg_chrom4_PA3_21519	OG0009722Hg_chrom4_TN10_25016	OG0009722Hg_chrom4_TN20_17788	OG0009722Hg_chrom4_TN7_21349	OG0009722Hg_chrom4_TN8_20346	OG0009722chr1X12_6087	OG0021731Hg_chrom4_TN22_21177
OG0006924	OG0002582Hg_chrom4_MM26_26046	OG0002582Hg_chrom4_OP50_16728	OG0002582Hg_chrom4_PA3_21536	OG0002582Hg_chrom4_TN10_24999	OG0002582Hg_chrom4_TN20_17797	OG0002582Hg_chrom4_TN22_21191	OG0002582Hg_chrom4_TN7_21368	OG0002582Hg_chrom4_TN8_20366	OG0002582chr1X12_6100
OG0006925	Hg_chrom4_PA3_21538	OG0008754Hg_chrom4_MM26_26049	OG0008754Hg_chrom4_OP50_16731	OG0008754Hg_chrom4_TN10_24995	OG0008754Hg_chrom4_TN20_17800	OG0008754Hg_chrom4_TN22_21194	OG0008754Hg_chrom4_TN7_21369	OG0008754Hg_chrom4_TN8_20369	OG0008754chr1X12_6104
OG0006926	OG0013330Hg_chrom4_MM26_26053	OG0013330Hg_chrom4_OP50_16734	OG0013330Hg_chrom4_PA3_21543	OG0013330Hg_chrom4_TN10_24992	OG0013330Hg_chrom4_TN20_17803	OG0013330chr1X12_6107	OG0036325Hg_chrom4_TN22_21197	OG0036325Hg_chrom4_TN7_21373	OG0036325Hg_chrom4_TN8_20372
OG0006927	OG0004109Hg_chrom4_MM26_26056	OG0004109Hg_chrom4_PA3_21546	OG0004109Hg_chrom4_TN10_24988	OG0004109Hg_chrom4_TN20_17804	OG0004109Hg_chrom4_TN22_21199	OG0004109Hg_chrom4_TN7_21376	OG0004109chr1X12_611	OG0039139Hg_chrom4_OP50_16735	OG0039139Hg_chrom4_TN8_20374
OG0006928	OG0015053Hg_chrom4_OP50_16738	OG0015053Hg_chrom4_TN10_24985	OG0015053Hg_chrom4_TN20_17807	OG0022753Hg_chrom4_MM26_26057	OG0022753Hg_chrom4_PA3_21548	OG0022753Hg_chrom4_TN22_21202	OG0022753Hg_chrom4_TN7_21378	OG0022753Hg_chrom4_TN8_20377	OG0022753chr1X12_6111
OG0006929	OG0015054Hg_chrom4_TN8_20380	OG0017374Hg_chrom4_MM26_26060	OG0017374Hg_chrom4_OP50_16740	OG0017374Hg_chrom4_PA3_21552	OG0017374Hg_chrom4_TN10_24983	OG0017374Hg_chrom4_TN20_17809	OG0017374Hg_chrom4_TN22_21205	OG0017374Hg_chrom4_TN7_21381	chr1X12_6113
[truncated: 2,131 more rows]

## Sheet: S6
Table S6: The unique SCN genome.
Orthogroup	MM26	OP50	PA3	TN10	TN20	TN22	TN7	TN8	X12
[truncated: 6,376 more rows]

## Sheet: S7a
Table S5a: Gene ontology terms within the core SCN pangenome
[truncated: 2,115 more rows]

[truncated: 5 more sheets: S7b, S7c, S8, S9, S10]
